# Supplementary material
Source: MDPI journal article supplement (https://www.mdpi.com/search?q=materials-14-01342)

# Convenient synthesis of functionalized unsymmetrical vinyl disulfides and their inverse-electron-demand hetero-Diels-Alder reaction

Supporting Information

Bartosz Jędrzejewski, Mateusz Musiejuk, Justyna Doroszuk and Dariusz Witt\*

Department of Organic Chemistry, Faculty of Chemistry, Gdansk University of Technology,  
Narutowicza 11/12, 80-233 Gdansk, Poland

Fax +48(58)3472694; E-mail: [dariusz.witt@pg.edu.pl](mailto:dariusz.witt@pg.edu.pl)

**Abstract:** We developed simple and efficient methods for the synthesis of functionalized unsymmetrical vinyl disulfides under mild conditions with moderate to high yields. The designed methods are based on the reaction of *S*-vinyl phosphorodithioate with thiosylates or *S*-vinyl thiosylates with thiols. The developed methods allow for the preparation of unsymmetrical vinyl disulfides with additional hydroxy, carboxy, protected amino or ester functionalities. Vinyl disulfides reacted with the generated transient *o*-iminiothioquinones in an inverse electron-demand [4+2] cycloaddition to afford benzo[*b*][1,4]thiazine derivatives.

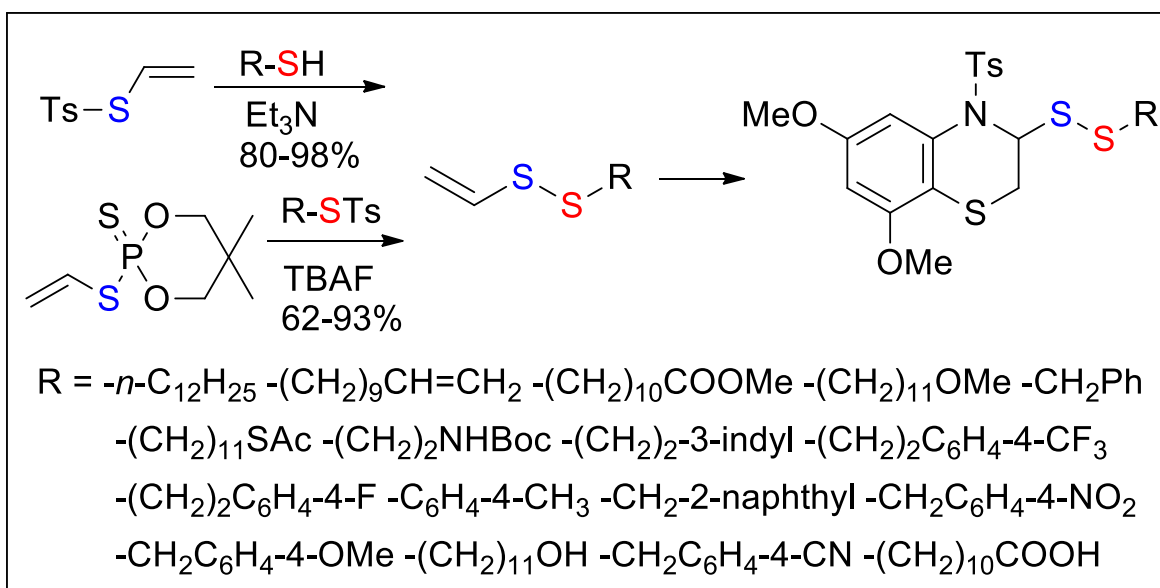

## Table of Contents

### Contents

|                                                                                            |     |
|--------------------------------------------------------------------------------------------|-----|
| General information.                                                                       | S3  |
| Experimental Procedures                                                                    | S3  |
| General procedure for the preparation of thiotosylates derivatives 1f-j;1l;1p.             | S3  |
| Synthesis of <i>N</i> -Boc cysteamine thiotosylate 1f                                      | S4  |
| Synthesis of vinyl disulfide 2 from S-vinyl phosphorodithioate                             | S4  |
| Synthesis of vinyl disulfide 2 from S-vinyl thiotosylate                                   | S5  |
| General procedure for synthesis of benzo[ <i>b</i> ][1,4]thiazine disulfanyl derivatives 7 | S6  |
| Spectral characterization of thiotosylates derivatives 1f-j;1l;1p                          | S7  |
| Spectral characterization of starting materials                                            | S8  |
| Spectral characterization of vinyl disulfides 2                                            | S9  |
| Spectral characterization of benzo[ <i>b</i> ][1,4]thiazine disulfanyl derivatives 7a-r    | S12 |
| References                                                                                 | S14 |
| Author Contributions                                                                       | S14 |
| NMR SPECTRA                                                                                | S14 |

## General information.

Preparation of thiosylates **1a-1e**; **1k**; **1m-1n**; **1r** was described in previous works.<sup>1</sup> All bromides were purchased from ProChimia, preparation of sodium 4-methylbenzenesulfonothioate from sodium 4-methylbenzenesulfonate purchased from Merck, was described previously.<sup>1</sup> Vinyl magnesium bromide solution (1M) in THF and tetrabutylammonium fluoride (TBAF) solution (1M) in THF were purchased from Merck.

Tetrahydrofuran was pre-dried over KOH pellets and distilled. Then it was dried by heating under reflux over potassium in the presence of benzophenone as an indicator. Chloroform, acetonitrile and dichloromethane were dried according to literature procedure. TLC was performed with silica gel Polygram SIL G/UV254. Column chromatography was performed using silica gel 60 (230-400 mesh, Merck).

NMR spectra were recorded on Bruker 400 MHz spectrometers. The residual solvent peak was used as the internal reference (CDCl<sub>3</sub>:  $\delta$ =7.26 ppm for <sup>1</sup>H,  $\delta$ =77.0 ppm for <sup>13</sup>C). IR spectra were recorded on Nicolet Is50 Ft-IR spectrometer by ATR method. Melting points were measured with a Gallenkamp 7936B apparatus and were not standardized.

## Experimental Procedures

### General procedure for the preparation of thiosylates derivatives **1f-j**; **1l**; **1p**.

From alkyl halides<sup>1</sup>

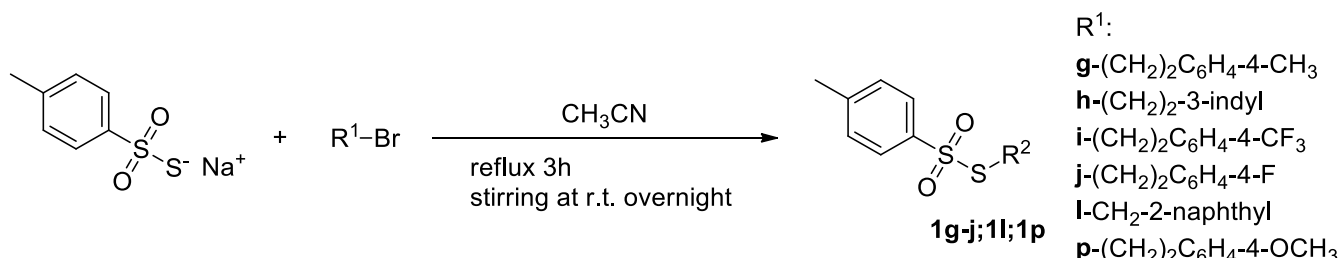

To the solution of alkyl halide (1 eq, 14.7 mmol) in dry acetonitrile (50 mL) under reflux condenser sodium 4-methylbenzenesulfonothioate (1 eq, 14.7 mmol) was added, reaction was refluxed 3 h, then was stirred overnight at rt. After this time solvent was evaporated, residue was washed with water (30 mL), and extracted 3 times with diethyl ether (50 mL). Combined organic layers were dried over MgSO<sub>4</sub>, filtered and evaporated to constant volume. Crude product was purified by column chromatography (SiO<sub>2</sub>). Pure compounds were identified by <sup>1</sup>H NMR and <sup>13</sup>C NMR spectra. Results are summarized in Table S1.

**Table S1.** Preparation of thiosylates **1**

| Entry | Halide                                                                                | Yield (%) <sup>[a]</sup> |
|-------|---------------------------------------------------------------------------------------|--------------------------|
| 1     | Br-CH <sub>2</sub> CH <sub>2</sub> -C <sub>6</sub> H <sub>4</sub> -4-CH <sub>3</sub>  | 80                       |
| 2     | Br-CH <sub>2</sub> CH <sub>2</sub> -3-indyl                                           | 87                       |
| 3     | Br-CH <sub>2</sub> CH <sub>2</sub> -C <sub>6</sub> H <sub>4</sub> -4-CF <sub>3</sub>  | 75                       |
| 4     | Br-CH <sub>2</sub> CH <sub>2</sub> -C <sub>6</sub> H <sub>4</sub> -4-F                | 70                       |
| 5     | Br-CH <sub>2</sub> -2-naphthyl                                                        | 78                       |
| 6     | Br-CH <sub>2</sub> CH <sub>2</sub> -C <sub>6</sub> H <sub>4</sub> -4-OCH <sub>3</sub> | 80                       |

[a] Isolated yield

## Synthesis of *N*-Boc cysteamine thiosylate **1f**

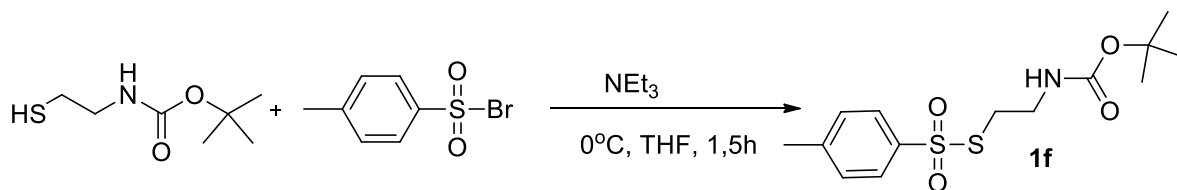

A solution of 564 mg of tosyl bromide (2.4 mmol) and triethylamine (2.4 mmol, 334  $\mu$ L) in dry THF (20 mL) was cooled to 0°C under nitrogen. Then a solution of 354 mg *N*-Boc cysteamine (2.0 mmol) in dry THF (5 mL) was added for 30 minutes. Mixture was stirred at 0°C for 1 h after complete addition. Then solvent was removed in vacuo and the residue was purified by column chromatography ( $\text{SiO}_2$ ) using DCM as eluent to provide 464 mg of *S*-(2-((tert-butoxycarbonyl)amino)ethyl) 4-methylbenzenesulfonothioate as a white solid with 70% yield.

## Synthesis of vinyl disulfides **2** from *S*-vinyl phosphorodithioate

### a. Synthesis of 5,5-Dimethyl-2-thioxo-2-vinylsulfanyl-[1,3,2]dioxaphosphorinane

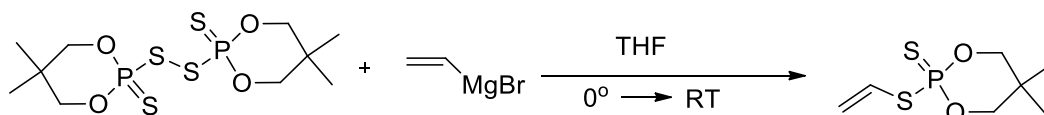

To a stirred solution of 868 mg (2.2 mmol) bis-(5,5-dimethyl-2-thioxo-1,3,2-dioxaphosphorinane-2-yl) disulfide in dry THF (3 mL) was cooled to -5°C under nitrogen, then vinylmagnesium bromide (2.0 mmol, 1M solution in THF, 2 mL) was added dropwise. After complete addition, mixture was stirred for 15 min at rt, and the solvent was removed in vacuo. Crude product was purified by silica gel column chromatography (petroleum ether/DCM 4:1) to provide 296 mg of *S*-vinyl phosphorodithioate as white powder with 66% yield.

### b. General procedure for synthesis of vinyl disulfide **2** from *S*-vinyl phosphorodithioate

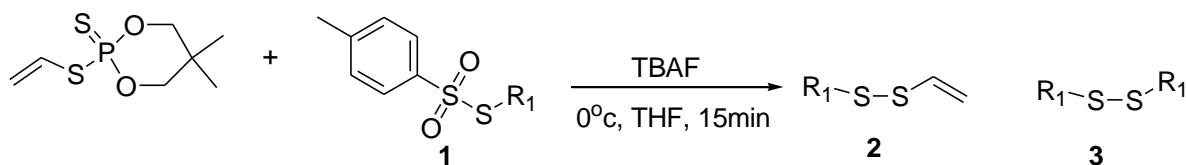

A stirred solution of 224 mg (1.0 mmol) *S*-vinyl phosphorodithioate and thiosylate **1** (1.0 mmol) in dry THF (5 mL) under nitrogen was cooled to 0°C. Then tetrabutylammonium fluoride (1.1 mmol, 1M solution in THF, 1.1 mL) was added in one portion. After addition, mixture was stirred for 15 min at 0°C. Solvent was removed in vacuo and crude product was purified by column chromatography ( $\text{SiO}_2$ ). Results are summarized in Table S2.

**Table S2.** Synthesis of vinyl disulfide **2** from *S*-vinyl phosphorodithioate

| Entry | R                                                                                           | Yield <b>2</b> (%) <sup>[a]</sup> | Yield <b>3</b> (%) <sup>[a]</sup> |
|-------|---------------------------------------------------------------------------------------------|-----------------------------------|-----------------------------------|
| 1     | -(CH <sub>2</sub> ) <sub>11</sub> CH <sub>3</sub> <b>1a</b>                                 | 93 <b>2a</b>                      | -                                 |
| 2     | -(CH <sub>2</sub> ) <sub>9</sub> CH=CH <sub>2</sub> <b>1b</b>                               | 82 <b>2b</b>                      | -                                 |
| 3     | -(CH <sub>2</sub> ) <sub>10</sub> COOCH <sub>3</sub> <b>1c</b>                              | 73 <b>2c</b>                      | -                                 |
| 4     | -(CH <sub>2</sub> ) <sub>11</sub> OCH <sub>3</sub> <b>1d</b>                                | 62 <b>2d</b>                      | -                                 |
| 5     | -(CH <sub>2</sub> ) <sub>11</sub> SCOCH <sub>3</sub> <b>1e</b>                              | 85 <b>2e</b>                      | -                                 |
| 6     | -(CH <sub>2</sub> ) <sub>2</sub> NHBOC <b>1f</b>                                            | 75 <b>2f</b>                      | -                                 |
| 7     | -(CH <sub>2</sub> ) <sub>2</sub> C <sub>6</sub> H <sub>4</sub> -4-CH <sub>3</sub> <b>1g</b> | 76 <b>2g</b>                      | -                                 |
| 8     | -(CH <sub>2</sub> ) <sub>2</sub> -3-indyl <b>1h</b>                                         | 75 <b>2h</b>                      | -                                 |
| 9     | -(CH <sub>2</sub> ) <sub>2</sub> C <sub>6</sub> H <sub>4</sub> -4-CF <sub>3</sub> <b>1i</b> | 65 <b>2i</b>                      | -                                 |

|    |                                                                                              |   |               |
|----|----------------------------------------------------------------------------------------------|---|---------------|
| 10 | -(CH <sub>2</sub> ) <sub>2</sub> C <sub>6</sub> H <sub>4</sub> -4-F <b>1j</b>                | - | 100 <b>3j</b> |
| 11 | -C <sub>6</sub> H <sub>4</sub> -4-CH <sub>3</sub> <b>1k</b>                                  | - | 100 <b>3k</b> |
| 12 | -CH <sub>2</sub> -2-naphthyl <b>1l</b>                                                       | - | 80 <b>3l</b>  |
| 13 | -CH <sub>2</sub> C <sub>6</sub> H <sub>4</sub> -4-NO <sub>2</sub> <b>1m</b>                  | - | 70 <b>3m</b>  |
| 14 | -CH <sub>2</sub> C <sub>6</sub> H <sub>4</sub> -4-OCH <sub>3</sub> <b>1n</b>                 | - | 85 <b>3n</b>  |
| 15 | -CH <sub>2</sub> C <sub>6</sub> H <sub>4</sub> -4-CN <b>1o</b>                               | - | 75 <b>3o</b>  |
| 16 | -(CH <sub>2</sub> ) <sub>2</sub> C <sub>6</sub> H <sub>4</sub> -4-OCH <sub>3</sub> <b>1p</b> | - | 86 <b>3p</b>  |
| 17 | -CH <sub>2</sub> C <sub>6</sub> H <sub>5</sub> <b>1r</b>                                     | - | 76 <b>3r</b>  |

[a] Isolated yield

## Synthesis of vinyl disulfide **2** from S-vinyl thiosylate

### a. Synthesis of bis (p-toluenesulfonyl)sulfide

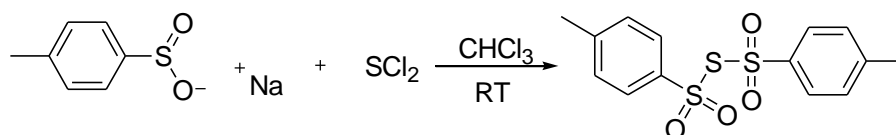

*Ditosylsulfide was prepared using modified literature procedure<sup>2</sup>:*

To a suspension of 13.54 g (76 mmol) sodium p-toluenesulfonate in dry CHCl<sub>3</sub> (150 mL) under N<sub>2</sub>, sulfur dichloride (40 mmol, 2.54 mL) was added dropwise. Mixture was stirred for 2 h at rt, then the insoluble material was filtered off. Solvent was removed in vacuo, obtained yellowish solid was recrystallized from boiling glacial acetic acid to provide 9.24 g (68%) of bis (p-toluenesulfonyl)sulfide as white needles (mp. 136-137°C, lit. 137°C), spectra were identical as reported in literature<sup>2</sup>.

### b. Synthesis of S-vinyl thiosylate

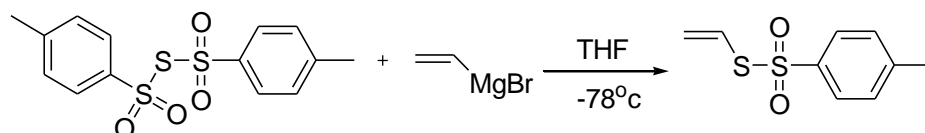

Vinylmagnesium bromide (10 mmol, 1M solution in THF, 10 mL) was added dropwise to a stirred solution of bis-(p-toluenesulfonyl)sulfide 5.47 g (16 mmol) in dry THF (200 mL) at -78°C under nitrogen. After the complete addition, mixture was stirred for 2 h at this temperature, then cooling bath was removed, and mixture was warmed to rt. Solvent was removed in vacuo, and the residue was purified by column chromatography (Hexene : DCM 2:1) to provide 1.29 g (60%) of S-vinyl thiosylate as a yellow oil.

### c. General procedure for synthesis of vinyl disulfides **2** from S-vinyl thiosylate

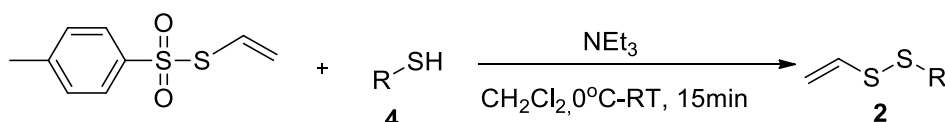

To stirred, ice cooled solution of S-vinyl thiosylate 428 mg (2.0 mmol) and thiol **4** (1.0 mmol) in dry DCM (10 mL) under nitrogen, NEt<sub>3</sub> (1.0 mmol, 140μL) was added in one portion. The mixture was stirred at rt for 15 min. Then solvent was evaporated and the residue was purified by column chromatography (SiO<sub>2</sub>) to provide disulfide **2**. Results are summarized in Table S3.

**Table S3.** Synthesis of vinyl disulfides **2** from *S*-vinyl thiosylate

| Entry | R                                                                             | Yield <b>2</b> (%) <sup>[a]</sup> |
|-------|-------------------------------------------------------------------------------|-----------------------------------|
| 1     | -(CH <sub>2</sub> ) <sub>11</sub> CH <sub>3</sub> <b>4a</b>                   | 97 <b>2a</b>                      |
| 2     | -(CH <sub>2</sub> ) <sub>10</sub> COOCH <sub>3</sub> <b>4c</b>                | 88 <b>2c</b>                      |
| 3     | -(CH <sub>2</sub> ) <sub>2</sub> C <sub>6</sub> H <sub>4</sub> -4-F <b>4j</b> | 90 <b>2j</b>                      |
| 4     | -C <sub>6</sub> H <sub>4</sub> -4-CH <sub>3</sub> <b>4k</b>                   | 96 <b>2k</b>                      |
| 5     | -CH <sub>2</sub> -2-naphthyl <b>4l</b>                                        | 92 <b>2l</b>                      |
| 6     | -CH <sub>2</sub> C <sub>6</sub> H <sub>4</sub> -4-NO <sub>2</sub> <b>4m</b>   | 80 <b>2m</b>                      |
| 7     | -CH <sub>2</sub> C <sub>6</sub> H <sub>4</sub> -4-OCH <sub>3</sub> <b>4n</b>  | 87 <b>2n</b>                      |
| 8     | -CH <sub>2</sub> C <sub>6</sub> H <sub>4</sub> -4-CN <b>4o</b>                | 89 <b>2o</b>                      |
| 9     | -CH <sub>2</sub> C <sub>6</sub> H <sub>5</sub> <b>4r</b>                      | 98 <b>2r</b>                      |
| 10    | -(CH <sub>2</sub> ) <sub>10</sub> COOH <b>4s</b>                              | 84 <b>2s</b>                      |
| 11    | -(CH <sub>2</sub> ) <sub>11</sub> OH <b>4t</b>                                | 91 <b>2t</b>                      |

[a] Isolated yields.

**General procedure for synthesis of benzo[*b*][1,4]thiazine disulfanyl derivatives **7****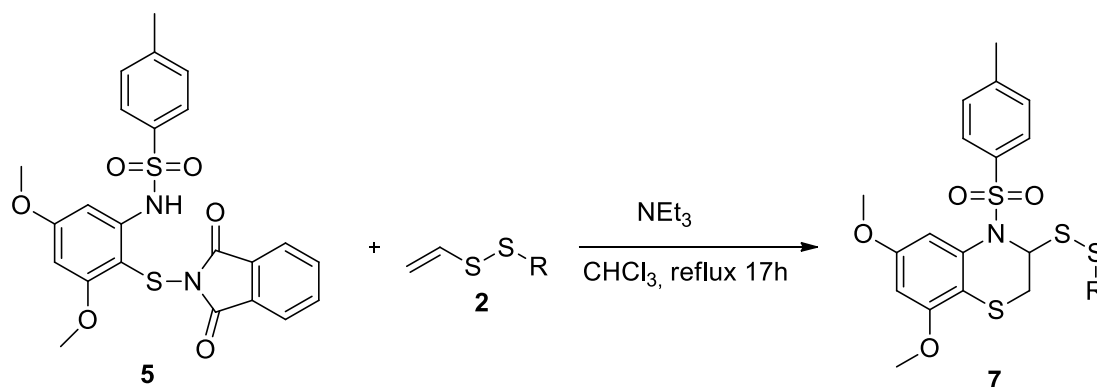

*Benzo[*b*][1,4]thiazine disulfanyl derivatives were prepared using modified procedure.<sup>3</sup>*

To a solution of 2-*N*-sulfonylthiophthalimide **5** 242 mg (0.5 mmol) and vinyl disulfide **2** (0.75 mmol) in dry CHCl<sub>3</sub> (20 mL) under nitrogen, triethylamine (0.5 mmol, 70 μL) was added. Mixture was stirred under reflux for 17 h, then solvent was removed in vacuo, and the crude product was purified by column chromatography (SiO<sub>2</sub>). Results are summarized in Table S4.

**Table S4.** Synthesis of benzo[*b*][1,4]thiazine disulfanyl derivatives **7**

| Entry | R                                                                  | Yield <b>7</b> (%) <sup>[a]</sup> | Recovered <b>2</b> (%) <sup>[a]</sup> |
|-------|--------------------------------------------------------------------|-----------------------------------|---------------------------------------|
| 1     | -(CH <sub>2</sub> ) <sub>11</sub> CH <sub>3</sub>                  | 50 <b>7a</b>                      | 35 <b>2a</b>                          |
| 2     | -(CH <sub>2</sub> ) <sub>10</sub> COOCH <sub>3</sub>               | 30 <b>7c</b>                      | 42 <b>2c</b>                          |
| 3     | -CH <sub>2</sub> C <sub>6</sub> H <sub>4</sub> -4-NO <sub>2</sub>  | 29 <b>7m</b>                      | 46 <b>2m</b>                          |
| 4     | -CH <sub>2</sub> C <sub>6</sub> H <sub>4</sub> -4-OCH <sub>3</sub> | 27 <b>7n</b>                      | 44 <b>2n</b>                          |
| 5     | -CH <sub>2</sub> C <sub>6</sub> H <sub>5</sub>                     | 25 <b>7r</b>                      | 52 <b>2r</b>                          |

[a] Isolated yields.

## Spectral characterization of thiosulfates derivatives 1f-j;1l;1p

### S-2-((tert-butoxycarbonyl)amino)ethyl 4-methylbenzenesulfonothioate 1f

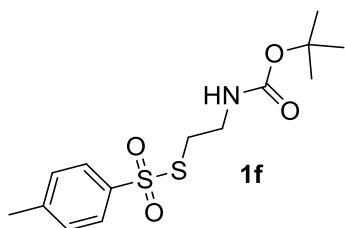

Chromatography: DCM ( $R_f=0.3$ ), Yield 464 mg 70%, white solid, mp. 120-121°C

$^1\text{H NMR}$  (400 MHz,  $\text{CDCl}_3$ )  $\delta$  7.84 (d,  $J = 8.4$  Hz, 2H), 7.37 (d,  $J = 8.5$  Hz, 2H), 4.93 (s, 1H), 3.47 – 3.34 (m, 2H), 3.12 (t,  $J = 6.3$  Hz, 2H), 2.48 (s, 3H), 1.45 (s, 9H).

$^{13}\text{C NMR}$  (101 MHz,  $\text{CDCl}_3$ )  $\delta$  155.7, 145.0, 141.7, 130.0, 127.1, 79.8, 39.7, 36.1, 28.3, 21.7.

HRMS (ESI):  $m/z$   $[\text{M} + \text{H}]^+$  calcd for  $\text{C}_{14}\text{H}_{22}\text{NO}_4\text{S}_2$ : 332.0985; found: 332.0990.

### S-2-(4-methylphenyl)eth-1-yl 4-methylbenzenesulfonothioate 1g

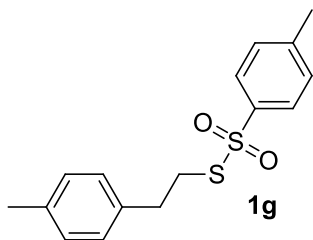

Chromatography : H/DCM 1/1 ( $R_f=0.28$ ), Yield 3.60g 80%, white solid, mp. 60-61°C

$^1\text{H NMR}$  (400 MHz,  $\text{CDCl}_3$ )  $\delta$  7.84 (d,  $J = 8.4$  Hz, 2H), 7.36 (d,  $J = 8.0$  Hz, 2H), 7.11 (d,  $J = 7.8$  Hz, 2H), 7.01 (d,  $J = 8.0$  Hz, 2H), 3.22 (t,  $J = 7.7$  Hz, 2H), 2.89 (t,  $J = 7.7$  Hz, 2H), 2.48 (s, 3H), 2.34 (s, 3H).

$^{13}\text{C NMR}$  (101 MHz,  $\text{CDCl}_3$ )  $\delta$  144.7, 142.1, 136.5, 135.7, 129.9, 129.3, 128.4, 127.1, 37.3, 34.7, 21.7, 21.1.

HRMS (ESI):  $m/z$   $[\text{M} + \text{H}]^+$  calcd for  $\text{C}_{16}\text{H}_{19}\text{O}_2\text{S}_2$ : 307.0821; found: 307.0824.

### S-2-(1H-indol-3-yl)ethyl 4-methylbenzenesulfonothioate 1h

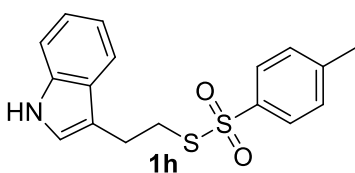

Chromatography : H/DCM 1/1 ( $R_f=0.25$ ), Yield 3.65g 75%, yellow oil, store at -10°C

$^1\text{H NMR}$  (400 MHz,  $\text{CDCl}_3$ )  $\delta$  8.07 (s, 1H), 7.85 (d,  $J = 8.3$  Hz, 2H), 7.52 (d,  $J = 7.9$  Hz, 1H), 7.38 (d,  $J = 8.1$  Hz, 1H), 7.34 (d,  $J = 8.0$  Hz, 1H), 7.26 – 7.20 (m, 1H), 7.17 – 7.11 (m, 1H), 6.99 (d,  $J = 2.3$  Hz, 1H), 3.33 (t,  $J = 7.5$  Hz, 2H), 3.12 (t,  $J = 7.5$  Hz, 2H), 2.48 (d,  $J = 6.6$  Hz, 3H).

$^{13}\text{C NMR}$  (101 MHz,  $\text{CDCl}_3$ )  $\delta$  144.7, 142.1, 136.2, 129.9, 127.0, 126.8, 122.3, 119.6, 118.5, 113.2, 111.3, 36.6, 25.1, 21.7.

HRMS (ESI):  $m/z$   $[\text{M} + \text{H}]^+$  calcd for  $\text{C}_{17}\text{H}_{18}\text{NO}_2\text{S}_2$ : 332.0773; found: 332.0774.

### S-2-(4-trifluoromethylphenyl)eth-1-yl 4-methylbenzenesulfonothioate 1i

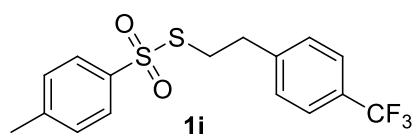

Chromatography : H/DCM 2/1 ( $R_f=0.27$ ), Yield 3.97g 75%, white solid, mp. 48-49°C

$^1\text{H NMR}$  (400 MHz,  $\text{CDCl}_3$ )  $\delta$  7.83 (d,  $J = 8.3$  Hz, 2H), 7.55 (d,  $J = 8.1$  Hz, 2H), 7.37 (d,  $J = 8.1$  Hz, 2H), 7.24 (d,  $J = 8.0$  Hz, 2H), 3.25 (t,  $J = 7.6$  Hz, 2H), 3.02 (t,  $J = 7.6$  Hz, 2H), 2.48 (s, 3H).

$^{13}\text{C NMR}$  (101 MHz,  $\text{CDCl}_3$ )  $\delta$  145.0, 142.7, 141.9, 129.9, 129.4, 129.0, 127.1, 125.6 (q,  $J = 3.8$  Hz), 122.8, 36.7, 35.0, 21.7.

HRMS (ESI):  $m/z$   $[\text{M} + \text{H}]^+$  calcd for  $\text{C}_{16}\text{H}_{16}\text{F}_3\text{O}_2\text{S}_2$ : 361.0538; found: 361.0541.

### S-2-(4-fluorophenyl)eth-1-yl 4-methylbenzenesulfonothioate 1j

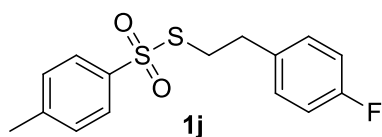

Chromatography : H/DCM 1/1 ( $R_f=0.3$ ), Yield 3.19g 70%, white solid, mp. 43-44°C

$^1\text{H NMR}$  (400 MHz,  $\text{CDCl}_3$ )  $\delta$  7.83 (d,  $J = 8.4$  Hz, 2H), 7.37 (d,  $J = 8.0$  Hz, 2H), 7.11 – 7.05 (m, 2H), 7.02 – 6.93 (m, 2H), 3.22 (t,  $J = 7.6$  Hz, 2H), 2.92 (t,  $J = 7.6$  Hz, 2H), 2.48 (s, 3H).

$^{13}\text{C NMR}$  (101 MHz,  $\text{CDCl}_3$ )  $\delta$  161.8 (d,  $J = 245.2$  Hz), 144.9, 142.0, 134.4 (d,  $J = 3.3$  Hz), 130.1 (d,  $J = 3.3$  Hz), 129.9, 127.0, 115.5 (d,  $J = 21.3$  Hz), 37.2, 34.4, 21.7.

HRMS (ESI):  $m/z$   $[\text{M} + \text{H}]^+$  calcd for  $\text{C}_{15}\text{H}_{16}\text{FO}_2\text{S}_2$ : 311.0570; found: 311.0575.

### S-(naphthalen-2-ylmethyl) 4-methylbenzenesulfonothioate 1l

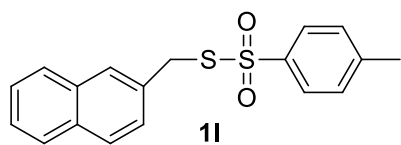

Chromatography : H/DCM 1/1 ( $R_f=0.35$ ), Yield 3.72g 77%, white solid, mp. 100-101°C

$^1\text{H NMR}$  (400 MHz,  $\text{CDCl}_3$ )  $\delta$  7.81 – 7.76 (m, 1H), 7.73 – 7.66 (m, 4H), 7.60 (s, 1H), 7.52 – 7.46 (m, 2H), 7.30 – 7.26 (m, 1H), 7.13 (d,  $J = 8.5$  Hz, 2H), 4.45 (s, 2H), 2.32 (s, 3H).

$^{13}\text{C NMR}$  (101 MHz,  $\text{CDCl}_3$ )  $\delta$  144.5, 142.1, 133.1, 132.8, 130.9, 129.5, 128.7, 128.2, 127.7, 127.6, 127.0, 126.5, 126.4, 126.3, 40.7, 21.5.

HRMS (ESI):  $m/z$   $[M + H]^+$  calcd for  $\text{C}_{18}\text{H}_{17}\text{O}_2\text{S}_2$ : 329.0664; found: 329.0665.

### S-2-(4-methoxyphenyl)eth-1-yl 4-methylbenzenesulfonothioate 1p

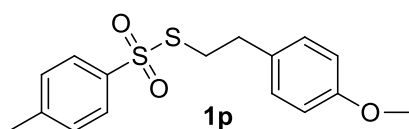

Chromatography : H/DCM 1/2 ( $R_f=0.32$ ), Yield 3.65g 77%, colorless oil, stored at -10°C

$^1\text{H NMR}$  (400 MHz,  $\text{CDCl}_3$ )  $\delta$  7.88 – 7.77 (m, 2H), 7.41 – 7.31 (m, 2H), 7.11 – 6.99 (m, 2H), 6.91 – 6.73 (m, 2H), 3.81 (s, 3H), 3.21 (t,  $J = 7.6$  Hz, 2H), 2.87 (t,  $J = 7.6$  Hz, 2H), 2.48 (s, 3H).

$^{13}\text{C NMR}$  (101 MHz,  $\text{CDCl}_3$ )  $\delta$  158.5, 144.8, 142.1, 130.8, 129.9, 129.6, 127.1, 114.0, 55.3, 37.5, 34.3, 21.7.

HRMS (ESI):  $m/z$   $[M + H]^+$  calcd for  $\text{C}_{16}\text{H}_{19}\text{O}_3\text{S}_2$ : 323.0770; found: 323.0773.

## Spectral characterization of starting materials

### 5,5-Dimethyl-2-thioxo-2-vinylsulfanyl-[1,3,2]dioxaphosphorinane

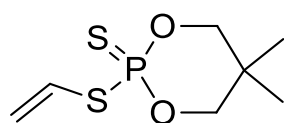

Chromatography: PE/DCM 4/1 ( $R_f=0.2$ ), Yield 0.296g 66%, white solid, mp. 57.8-58.8 °C

$^1\text{H NMR}$  (400 MHz,  $\text{CDCl}_3$ )  $\delta$  6.50 (dt,  $J = 16.6, 9.3$  Hz, 1H), 5.79 – 5.63 (m, 2H), 4.21 (dd,  $J = 10.8, 7.0$  Hz, 2H), 4.02 (dtd,  $J = 11.2, 2.4, 1.2$  Hz, 2H), 1.29 (s, 3H), 0.97 (s, 3H).

$^{13}\text{C NMR}$  (101 MHz,  $\text{CDCl}_3$ )  $\delta$  124.0 (d,  $J = 4.5$  Hz), 123.5 (d,  $J = 12.6$  Hz), 77.6 (d,  $J = 9.0$  Hz), 32.5 (d,  $J = 7.0$  Hz), 21.0 (d,  $J = 1.2$  Hz).

$^{31}\text{P NMR}$  (202 MHz,  $\text{CDCl}_3$ )  $\delta$  82.46.

HRMS (ESI):  $m/z$   $[M + H]^+$  calcd for  $\text{C}_7\text{H}_{14}\text{O}_2\text{PS}_2$ : 225.0167; found: 225.0168.

### toluene-4-thiosulfonic acid S-vinyl ester

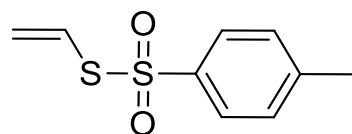

Chromatography: PE/DCM 2/1 ( $R_f=0.3$ ), Yield 1.29g 60%, yellow oil, stored at -10 °C

$^1\text{H NMR}$  (400 MHz,  $\text{CDCl}_3$ )  $\delta$  7.79 (d,  $J = 8.4$  Hz, 2H), 7.35 (d,  $J = 8.1$  Hz, 2H), 6.62 (dd,  $J = 16.5, 9.0$  Hz, 1H), 5.78 (d,  $J = 9.0$  Hz, 1H), 5.61 (d,  $J = 16.5$  Hz, 1H), 2.47 (s, 3H).

$^{13}\text{C NMR}$  (101 MHz,  $\text{CDCl}_3$ )  $\delta$  145.0, 141.4, 129.7, 128.0, 127.3, 125.5, 21.7.

HRMS (ESI):  $m/z$   $[M + H]^+$  calcd for  $\text{C}_9\text{H}_{11}\text{O}_2\text{S}_2$ : 215.0195; found: 215.0196.



## Spectral characterization of vinyl disulfides 2

### 1-vinylbisulfanyldodecane 2a

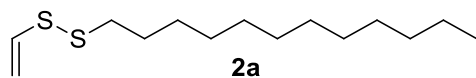

Chromatography: Hexene ( $R_f=0.6$ ), Yield 0.242g, 93% (Table S2 entry 1); 0.253g, 97% (Table S3 entry 1), colorless oil

$^1\text{H NMR}$  (400 MHz,  $\text{CDCl}_3$ )  $\delta$  6.41 (dd,  $J = 16.2, 9.6$  Hz, 1H), 5.56 (d,  $J = 16.2$  Hz, 1H), 5.36 (d,  $J = 9.6$  Hz, 1H), 2.73 (t,  $J = 7.3$  Hz, 2H), 1.74–1.64 (m, 2H), 1.44–1.26 (m, 18H), 0.91 (t,  $J = 6.9$  Hz, 3H).

$^{13}\text{C NMR}$  (101 MHz,  $\text{CDCl}_3$ )  $\delta$  133.8, 113.1, 38.3, 31.9, 29.6, 29.6, 29.6, 29.5, 29.3, 29.2, 29.1, 28.5, 22.7, 14.1.

HRMS (ESI):  $m/z$   $[\text{M} + \text{H}]^+$  calcd for  $\text{C}_{14}\text{H}_{29}\text{S}_2$ : 261.1705; found: 261.1711.

### 11-vinylbisulfanylundec-1-ene 2b

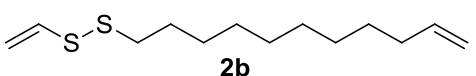

Chromatography: Hexene ( $R_f=0.57$ ), Yield 0.200g, 82% (Table S2 entry 2), colorless oil

$^1\text{H NMR}$  (400 MHz,  $\text{CDCl}_3$ )  $\delta$  6.41 (dd,  $J = 16.2, 9.6$  Hz, 1H), 5.92–5.74 (m, 1H), 5.56 (d,  $J = 16.2$  Hz, 1H), 5.36 (d,  $J = 9.6$  Hz, 1H), 5.06–4.93 (m, 2H), 2.73 (t,  $J = 7.3$  Hz, 2H), 2.10–2.03 (m, 2H), 1.74–1.64 (m, 2H), 1.46–1.28 (m, 12H).

$^{13}\text{C NMR}$  (101 MHz,  $\text{CDCl}_3$ )  $\delta$  139.2, 133.8, 114.1, 113.1, 38.3, 33.8, 29.4, 29.4, 29.2, 29.1, 29.1, 28.9, 28.5.

HRMS (ESI):  $m/z$   $[\text{M} + \text{H}]^+$  calcd for  $\text{C}_{13}\text{H}_{25}\text{S}_2$ : 245.1392; found: 245.1395.

### 11-vinylbisulfanylundecanoic acid methyl ester 2c

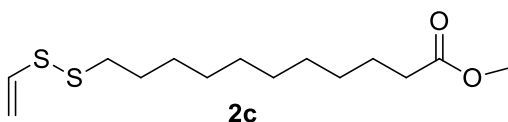

Chromatography: Hexene/DCM 2/1 ( $R_f=0.25$ ), Yield 0.212g, 73% (Table S2 entry 3); 0.256g, 88% (Table S3 entry 2), colorless oil

$^1\text{H NMR}$  (400 MHz,  $\text{CDCl}_3$ )  $\delta$  6.40 (dd,  $J = 16.2, 9.6$  Hz, 1H), 5.55 (d,  $J = 16.3$  Hz, 1H), 5.36 (d,  $J = 9.6$  Hz, 1H), 3.69 (s, 3H), 2.72 (t,  $J = 7.3$  Hz, 2H), 2.32 (t,  $J = 7.5$  Hz, 2H), 1.77–1.62 (m, 4H), 1.48–1.20 (m, 12H).

$^{13}\text{C NMR}$  (101 MHz,  $\text{CDCl}_3$ )  $\delta$  174.3, 133.8, 113.1, 51.5, 38.2, 34.1, 29.4, 29.3, 29.2, 29.2, 29.1, 29.1, 28.5, 24.9.

HRMS (ESI):  $m/z$   $[\text{M} + \text{H}]^+$  calcd for  $\text{C}_{14}\text{H}_{27}\text{O}_2\text{S}_2$ : 291.1447; found: 291.1452.

### 11-methoxy-1-vinylbisulfanylundecane 2d

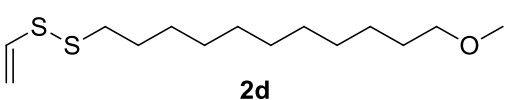

Chromatography: Hexene/DCM 3/1 ( $R_f=0.44$ ), Yield 0.171g, 62% (Table S2 entry 4), colorless oil

$^1\text{H NMR}$  (400 MHz,  $\text{CDCl}_3$ )  $\delta$  6.40 (dd,  $J = 16.2, 9.6$  Hz, 1H), 5.56 (d,  $J = 16.2$  Hz, 1H), 5.36 (d,  $J = 9.6$  Hz, 1H), 3.39 (t,  $J = 6.6$  Hz, 2H), 3.35 (s, 3H), 2.71 (t,  $J = 7.4$  Hz, 2H), 1.45–1.19 (m, 18H).

$^{13}\text{C NMR}$  (101 MHz,  $\text{CDCl}_3$ )  $\delta$  133.8, 113.1, 73.0, 58.5, 38.3, 29.7, 29.5, 29.5, 29.5, 29.2, 29.1, 28.5, 26.1.

HRMS (ESI):  $m/z$   $[\text{M} + \text{H}]^+$  calcd for  $\text{C}_{14}\text{H}_{29}\text{OS}_2$ : 277.1654; found: 277.1657.

### S-(11-(vinylbisulfanyl)undec-1-yl) ethanethioate 2e

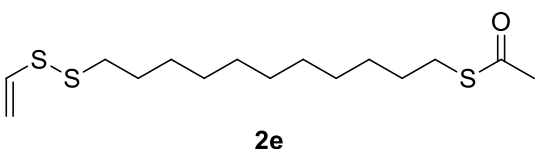

Chromatography: Hexene/Ethyl acetate 3/1 ( $R_f=0.31$ ), Yield 0.273g, 85% (Table S2 entry 5), yellowish oil

$^1\text{H NMR}$  (400 MHz,  $\text{CDCl}_3$ )  $\delta$  6.40 (dd,  $J = 16.2, 9.6$  Hz, 1H), 5.55 (d,  $J = 16.2$  Hz, 1H), 5.36 (d,  $J = 9.6$  Hz, 1H), 2.89 (t,  $J = 7.3$  Hz, 2H), 2.72 (t,  $J = 7.3$  Hz,

2H), 2.34 (s, 3 H), 1.72-1.65 (m, 2H), 1.62–1.54 (m, 2H), 1.46–1.21 (m, 14 H).  
 $^{13}\text{C}$  NMR (101 MHz,  $\text{CDCl}_3$ )  $\delta$  = 196.1, 133.8, 113.1, 38.2, 30.7, 29.5, 29.5, 29.4, 29.2, 29.1, 29.1, 28.8, 28.5.  
HRMS (ESI):  $m/z$   $[\text{M} + \text{H}]^+$  calcd for  $\text{C}_{15}\text{H}_{29}\text{OS}_3$ : 321.1375; found: 321.1371.

#### **N-(2-vinyl-disulfanylethyl)-carbamic acid *tert*-butyl ester 2f**

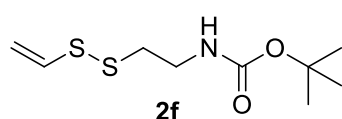

Chromatography: Hexene/DCM 2/1 ( $R_f=0.35$ ), Yield 0.177g, 75% (Table S2 entry 6), colorless oil

$^1\text{H}$  NMR (400 MHz,  $\text{CDCl}_3$ )  $\delta$  6.40 (dd,  $J$  = 16.2, 9.5 Hz, 1H), 5.58 (d,  $J$  = 16.2 Hz, 1H), 5.41 (d,  $J$  = 9.6 Hz, 1H), 4.90 (s, 1 H), 3.45 (dd,  $J$  = 11.6, 5.6 Hz, 2H), 2.83 (t,  $J$  = 6.2 Hz, 2H), 1.47 (s, 9 H).

$^{13}\text{C}$  NMR (101 MHz,  $\text{CDCl}_3$ )  $\delta$  155.7, 133.1, 114.1, 79.6, 39.1, 37.7, 28.4.  
HRMS (ESI):  $m/z$   $[\text{M} + \text{H}]^+$  calcd for  $\text{C}_9\text{H}_{18}\text{NO}_2\text{S}_2$ : 236.0773; found: 236.0772.

#### **4-(2-vinyl-disulfanyleth-1-yl)toluene 2g**

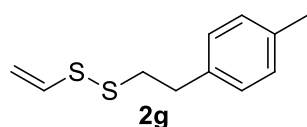

Chromatography: Hexene ( $R_f=0.55$ ), Yield 0.160g, 76% (Table S2 entry 7), colorless oil

$^1\text{H}$  NMR (400 MHz,  $\text{CDCl}_3$ )  $\delta$  7.16–7.09 (m, 4 H), 6.42 (dd,  $J$  = 16.2, 9.5 Hz, 1H), 5.57 (d,  $J$  = 16.3 Hz, 1H), 5.38 (d,  $J$  = 9.6 Hz, 1H), 2.98–2.93 (m, 4 H), 2.35 (s, 3 H).

$^{13}\text{C}$  NMR (101 MHz,  $\text{CDCl}_3$ )  $\delta$  133.5, 129.2, 129.2, 128.5, 128.5, 113.5, 39.3, 35.1, 21.1.  
HRMS (ESI):  $m/z$   $[\text{M} + \text{H}]^+$  calcd for  $\text{C}_{11}\text{H}_{15}\text{S}_2$ : 211.0610; found: 211.0614.

#### **3-(2-vinyl-disulfanyleth-1-yl)-1H-indole 2h**

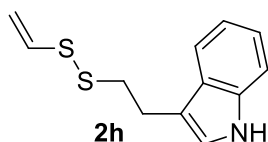

Chromatography: Hexene/DCM 2/1 ( $R_f=0.27$ ), Yield 0.177g, 75% (Table S2 entry 8), colorless oil, stored at  $-10^\circ\text{C}$

$^1\text{H}$  NMR (400 MHz,  $\text{CDCl}_3$ )  $\delta$  8.02 (s, 1H), 7.62 (d,  $J$  = 7.9 Hz, 1H), 7.39 (dd,  $J$  = 8.1, 0.8 Hz, 1H), 7.26–7.20 (m, 1H), 7.15 (ddd,  $J$  = 8.0, 7.1, 1.0 Hz, 1H), 7.08 (d,  $J$  = 2.3 Hz, 1H), 6.45 (dd,  $J$  = 16.2, 9.6 Hz, 1H), 5.60 (d,  $J$  = 16.2 Hz, 1H), 5.39 (d,  $J$  = 9.6 Hz, 1H), 3.19 (ddd,  $J$  = 8.1, 3.7, 2.4 Hz, 2H), 3.12–3.01

(m, 2H).

$^{13}\text{C}$  NMR (101 MHz,  $\text{CDCl}_3$ )  $\delta$  133.7, 122.2, 121.8, 119.4, 118.7, 114.3, 113.5, 111.2, 38.5, 25.3.

HRMS (ESI):  $m/z$   $[\text{M} + \text{H}]^+$  calcd for  $\text{C}_{12}\text{H}_{14}\text{NS}_2$ : 236.0562; found: 236.0566.

#### **4-(2-vinyl-disulfanyleth-1-yl)-trifluoromethylbenzene 2i**

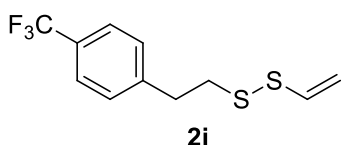

Chromatography: Hexene/DCM 5/1 ( $R_f=0.33$ ), Yield 0.172g, 65% (Table S2 entry 9), colorless oil

$^1\text{H}$  NMR (400 MHz,  $\text{CDCl}_3$ )  $\delta$  7.58 (d,  $J$  = 8.0 Hz, 2H), 7.34 (d,  $J$  = 8.0 Hz, 2H), 6.40 (dd,  $J$  = 16.2, 9.5 Hz, 1H), 5.57 (d,  $J$  = 16.3 Hz, 1H), 5.40 (d,  $J$  = 9.5 Hz, 1H), 3.13 – 3.03 (m, 2H), 3.03 – 2.86 (m, 2H).

$^{13}\text{C}$  NMR (101 MHz,  $\text{CDCl}_3$ )  $\delta$  143.9, 133.2, 129.0, 128.7, 125.5 (q,  $J$  = 3.8 Hz), 113.9, 39.5, 35.3.

HRMS (ESI):  $m/z$   $[\text{M} + \text{H}]^+$  calcd for  $\text{C}_{11}\text{H}_{12}\text{F}_3\text{S}_2$ : 265.0327; found: 265.0329.

#### **4-(2-vinyl-disulfanyleth-1-yl)-fluorobenzene 2j**

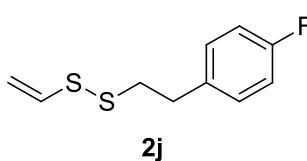

Chromatography: Hexene/DCM 4/1 ( $R_f=0.44$ ), Yield 0.193g, 90% (Table S3 entry 3), colorless oil,

$^1\text{H}$  NMR (400 MHz,  $\text{CDCl}_3$ )  $\delta$  7.20-7.10 (m, 2H), 7.08-6.95 (m, 2H), 6.41 (dd,  $J$  = 16.2, 9.6 Hz, 1H), 5.56 (d,  $J$  = 16.2 Hz, 1H), 5.39 (d,  $J$  = 9.5 Hz, 1H), 3.02–2.90 (m, 4H).

$^{13}\text{C}$  NMR (101 MHz,  $\text{CDCl}_3$ )  $\delta$  163.2, 143.8, 135.7 (d,  $J$  = 3.4 Hz), 130.0 (d,  $J$  = 8.0 Hz), 115.3 (d,  $J$  =

21.1 Hz), 113.6, 39.2, 34.7.

HRMS (ESI):  $m/z$   $[\text{M} + \text{H}]^+$  calcd for  $\text{C}_{10}\text{H}_{12}\text{FS}_2$ : 215.0359; found: 215.0364.

#### 4-vinyldisulfanyltoluene 2k

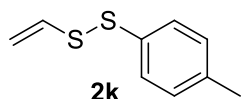

Chromatography: Hexene ( $R_f=0.6$ ), Yield 0.175g, 96% (Table S3 entry 4), yellowish oil,

$^1\text{H NMR}$  (400 MHz,  $\text{CDCl}_3$ )  $\delta$  7.41 (d,  $J = 8.2$  Hz, 2H), 7.15 (d,  $J = 8.0$  Hz, 2H), 6.48 (dd,  $J = 16.2, 9.5$  Hz, 1H), 5.57 (d,  $J = 16.2$  Hz, 1H), 5.39 (d,  $J = 9.5$  Hz, 1H), 2.36 (s, 3H).

$^{13}\text{C NMR}$  (101 MHz,  $\text{CDCl}_3$ )  $\delta$  137.6, 133.1, 132.9, 129.8, 128.7, 114.2, 21.1.

HRMS (ESI):  $m/z$  [ $M + H$ ] $^+$  calcd for  $\text{C}_9\text{H}_{11}\text{S}_2$ : 183.0297; found: 183.0303.

#### 2-(vinyldisulfanylmethyl)naphthalene 2l

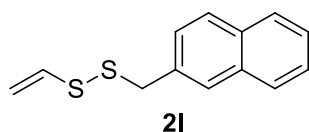

Chromatography: Hexene/Toluene 5/1 ( $R_f=0.5$ ), Yield 0.214g, 92% (Table S3 entry 5), yellowish oil,

$^1\text{H NMR}$  (400 MHz,  $\text{CDCl}_3$ )  $\delta$  7.87–7.82 (m, 3H), 7.75 (s, 1H), 7.55–7.45 (m, 3H), 6.27 (dd,  $J = 26.3, 16.8$  Hz, 1H), 5.51 (d,  $J = 16.3$  Hz, 1H), 5.28 (d,  $J = 9.5$  Hz, 1H), 4.09 (s, 2H).

$^{13}\text{C NMR}$  (101 MHz,  $\text{CDCl}_3$ )  $\delta$  134.2, 133.3, 133.2, 132.7, 128.4, 127.8, 127.2, 126.1, 113.8, 42.8.

HRMS (ESI):  $m/z$  [ $M + H$ ] $^+$  calcd for  $\text{C}_{13}\text{H}_{13}\text{S}_2$ : 233.0453; found: 233.0456.

#### 4-(vinyldisulfanylmethyl)nitrobenzene 2m

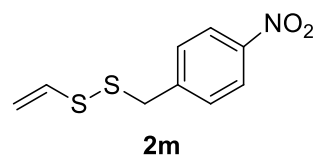

Chromatography: Hexane/Toluene 2/1 ( $R_f=0.3$ ), Yield 0.222g, 80% (Table S3 entry 6), yellow oil,

$^1\text{H NMR}$  (400 MHz,  $\text{CDCl}_3$ )  $\delta$  8.21 (d,  $J = 8.7$  Hz, 2H), 7.48 (d,  $J = 8.7$  Hz, 2H), 6.20 (dd,  $J = 16.3, 9.5$  Hz, 1H), 5.46 (d,  $J = 16.3$  Hz, 1H), 5.30 (d,  $J = 9.5$  Hz, 1H), 3.96 (s, 2H).

$^{13}\text{C NMR}$  (101 MHz,  $\text{CDCl}_3$ )  $\delta$  147.3, 144.6, 132.6, 130.2, 123.8, 114.5, 41.3.

HRMS (ESI):  $m/z$  [ $M + H$ ] $^+$  calcd for  $\text{C}_9\text{H}_{10}\text{NO}_2\text{S}_2$ : 228.0147; found: 228.0152.

#### 4-(vinyldisulfanylmethyl)methoxybenzene 2n

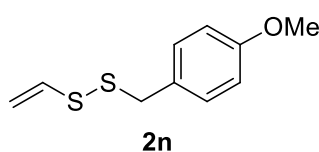

Chromatography: Hexane/DCM 3/1 ( $R_f = 0.36$ ), Yield 0.185g, 87% (Table S3 entry 7), colorless oil,

$^1\text{H NMR}$  (400 MHz,  $\text{CDCl}_3$ )  $\delta$  7.25 (d,  $J = 8.6$  Hz, 2H), 6.88 (d,  $J = 8.6$  Hz, 2H), 6.26 (dd,  $J = 16.3, 9.5$  Hz, 1H), 5.50 (d,  $J = 16.3$  Hz, 1H), 5.32 (d,  $J = 9.5$  Hz, 1H), 3.89 (s, 2H), 3.83 (s, 3H).

$^{13}\text{C NMR}$  (101 MHz,  $\text{CDCl}_3$ )  $\delta$  159.1, 133.2, 130.5, 128.8, 114.0, 113.5, 55.3, 41.9.

HRMS (ESI):  $m/z$  [ $M + H$ ] $^+$  calcd for  $\text{C}_{10}\text{H}_{13}\text{OS}_2$ : 213.0402; found: 213.0408.

#### 4-(vinyldisulfanylmethyl)benzonitrile 2o

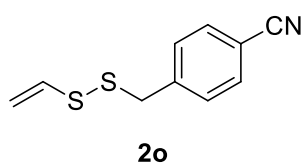

Chromatography: Hexane/DCM 2/1 ( $R_f = 0.45$ ), Yield 0.185g, 89% Table S3 entry 8), colorless oil,

$^1\text{H NMR}$  (400 MHz,  $\text{CDCl}_3$ )  $\delta$  7.64 (d,  $J = 8.3$  Hz, 2H), 7.43 (d,  $J = 8.3$  Hz, 2H), 6.19 (dd,  $J = 16.3, 9.5$  Hz, 1H), 5.45 (d,  $J = 16.3$  Hz, 1H), 5.30 (d,  $J = 9.5$  Hz, 1H), 3.92 (s, 2H).

$^{13}\text{C NMR}$  (101 MHz,  $\text{CDCl}_3$ )  $\delta$  137.8, 127.9, 127.5, 125.4, 114.0, 109.6, 106.6, 36.8.

HRMS (ESI):  $m/z$  [ $M + H$ ] $^+$  calcd for  $\text{C}_{10}\text{H}_{10}\text{NS}_2$ : 208.0249; found: 208.0246.

## Vinyl-benzyl disulfide 2r

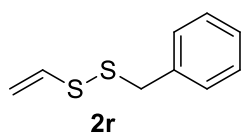

Chromatography: Hexane ( $R_f=0.6$ ), Yield 0.179g, 98% (Table S3 entry 9), yellowish oil,

$^1\text{H NMR}$  (400 MHz,  $\text{CDCl}_3$ )  $\delta$  7.44–.27 (m, 5H), 6.25 (dd,  $J = 16.3, 9.5$  Hz, 1H), 5.49 (d,  $J = 16.3$  Hz, 1H), 5.31 (d,  $J = 9.5$  Hz, 1H), 3.93 (s, 2H).

$^{13}\text{C NMR}$  (101 MHz,  $\text{CDCl}_3$ )  $\delta$  136.8, 133.1, 129.4, 128.6, 127.6, 113.7, 42.5.

HRMS (ESI):  $m/z$   $[\text{M} + \text{H}]^+$  calcd for  $\text{C}_9\text{H}_{11}\text{S}_2$ : 183.0297; found: 183.0302.

## 11-(vinyl-disulfanyl)undecanoic acid 2s

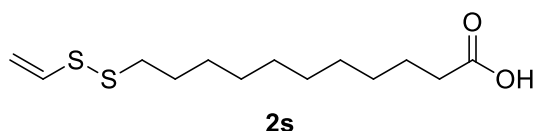

Chromatography: DCM/Ethyl acetate 9/1 ( $R_f=0.3$ ), Yield 0.232g 84% (Table S3 entry 10), colorless oil,

$^1\text{H NMR}$  (400 MHz,  $\text{CDCl}_3$ )  $\delta$  6.40 (dd,  $J = 16.2, 9.6$  Hz, 1H), 5.56 (d,  $J = 16.2$  Hz, 1H), 5.36 (d,  $J = 9.6$  Hz, 1H), 2.70 (t,  $J = 7.4$  Hz, 2H), 2.37 (t,  $J = 7.5$  Hz, 2H), 1.75–1.60 (m, 4H), 1.45–1.26 (m, 12H).

$^{13}\text{C NMR}$  (101 MHz,  $\text{CDCl}_3$ )  $\delta$  179.5, 133.8, 113.1, 38.2, 29.4, 29.3, 29.2, 29.2, 29.1, 29.0, 28.5, 24.7.

HRMS (ESI):  $m/z$   $[\text{M} + \text{H}]^+$  calcd for  $\text{C}_{13}\text{H}_{25}\text{O}_2\text{S}_2$ : 277.1290; found: 277.1286.

## 11-(vinyl-disulfanyl)-undecan-1-ol 2t

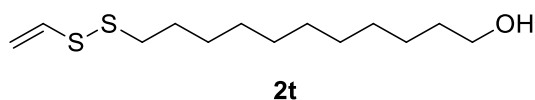

Chromatography: DCM ( $R_f=0.27$ ), Yield 0.239g, 91% (Table S3 entry 11), colorless oil,

$^1\text{H NMR}$  (400 MHz,  $\text{CDCl}_3$ )  $\delta$  6.40 (dd,  $J = 16.2, 9.6$  Hz, 1H), 5.56 (d,  $J = 16.2$  Hz, 1H), 5.36 (d,  $J = 9.6$  Hz, 1H), 3.67 (t,  $J = 6.6$  Hz, 2H), 2.72 (t,  $J = 7.3$ , 2H), 1.72–1.64 (m, 2H), 1.48–1.14 (m, 16H).

$^{13}\text{C NMR}$  (101 MHz,  $\text{CDCl}_3$ )  $\delta$  133.8, 113.1, 63.1, 38.2, 32.8, 29.6, 29.5, 29.5, 29.4, 29.2, 29.1, 28.5, 25.7.

HRMS (ESI):  $m/z$   $[\text{M} + \text{H}]^+$  calcd for  $\text{C}_{13}\text{H}_{27}\text{OS}_2$ : 263.1498; found: 263.1503.

## Spectral characterization of benzo[b][1,4]thiazine disulfanyl derivatives 7a-r

### 3-(dodec-1-yl-disulfanyl)-6,8-dimethoxy-4-(4-toluenesulfonyl)-3,4-dihydro-2H-benzo[1,4]thiazine 7a

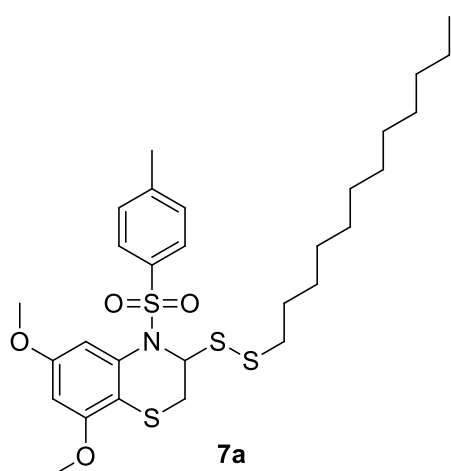

Chromatography: Hexane/DCM 2/1 ( $R_f=0.32$ ), Yield 0.150g, 50% (Table S4 entry 1), thick yellow oil,

$^1\text{H NMR}$  (400 MHz,  $\text{CDCl}_3$ )  $\delta$  7.52 (d,  $J = 8.3$  Hz, 2H), 7.21 (d,  $J = 8.1$  Hz, 2H), 7.03 (d,  $J = 2.4$  Hz, 1H), 6.37 (d,  $J = 2.4$  Hz, 1H), 5.89 (t,  $J = 5.2$  Hz, 1H), 3.83 (s, 3H), 3.83 (s, 3H), 3.15–2.85 (m, 2H), 2.87–2.74 (m, 2H), 2.40 (s, 3H), 1.71–1.54 (m, 2H), 1.44–1.21 (m, 18H), 0.88 (t,  $J = 6.9$  Hz, 3H).

$^{13}\text{C NMR}$  (101 MHz,  $\text{CDCl}_3$ )  $\delta$  157.8, 156.0, 144.2, 135.9, 133.4, 129.6, 127.4, 109.2, 105.1, 97.4, 65.4, 56.1, 55.6, 39.2, 31.9, 29.7, 29.7, 29.5, 29.4, 22.7, 21.6, 14.1.

IR (ATR): 2922(w), 2851(w), 1578(w), 1455(w), 1434(w), 1308(s), 1284(w), 1228(w), 1185(w), 1060(w), 1039(w), 842(s), 829(s), 812(s), 705(w), 694(s), 644(s)  $\text{cm}^{-1}$

HRMS (ESI):  $m/z$   $[\text{M} + \text{H}]^+$  calcd for  $\text{C}_{29}\text{H}_{44}\text{NO}_4\text{S}_4$ : 598.2148; found: 598.2153.

### 3-(10-methoxycarbonyldec-1-yl)disulfanyl)-6,8-dimethoxy-4-(4-toluenesulfonyl)-3,4-dihydro-2H-benzo[1,4]thiazine 7c

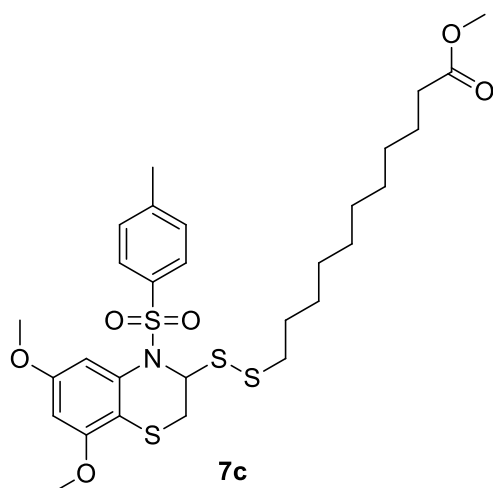

Chromatography: DCM ( $R_f = 0.45$ ), Yield 0.094g, 30% (Table S4 entry 2), thick yellow oil

$^1\text{H NMR}$  (400 MHz,  $\text{CDCl}_3$ )  $\delta$  7.52 (d,  $J = 8.3$  Hz, 2H), 7.21 (d,  $J = 8.1$  Hz, 2H), 7.04 (d,  $J = 2.4$  Hz, 1H), 6.37 (d,  $J = 2.4$  Hz, 1H), 5.89 (t,  $J = 5.2$  Hz, 1H), 3.84 (s, 3H), 3.83 (s, 3H), 3.69 (s, 3H), 3.15–2.85 (m, 2H), 2.88–2.74 (m, 2H), 2.40 (s, 3H), 2.33 (t,  $J = 7.5$  Hz, 2H), 1.70–1.55 (m, 4H), 1.41–1.25 (m, 12H).

$^{13}\text{C NMR}$  (101 MHz,  $\text{CDCl}_3$ )  $\delta$  157.8, 156.0, 144.2, 135.9, 129.6, 127.4, 105.1, 97.4, 65.4, 56.1, 55.6, 51.5, 39.2, 34.1, 31.2, 29.4, 29.4, 29.2, 29.2, 29.1, 28.5, 25.0, 21.6.

IR (ATR): 2924(w), 2851(w), 1733(m), 1597(m), 1455(m), 1434(m), 1355(m), 1307(m), 1228(m), 1200(vs), 1186(m), 1161(m), 1114(w), 1059(w), 961(w), 829(w), 744(m), 705(s), 694(m), 609(s), 580(m), 566(s), 540(s)  $\text{cm}^{-1}$

HRMS (ESI):  $m/z$  [ $M + H$ ] $^+$  calcd for  $\text{C}_{29}\text{H}_{42}\text{NO}_6\text{S}_4$ : 628.1889; found: 628.1901.

### 3-(4-nitrobenzyl)disulfanyl)-6,8-dimethoxy-4-(4-toluenesulfonyl)-3,4-dihydro-2H-benzo[1,4]thiazine 7m

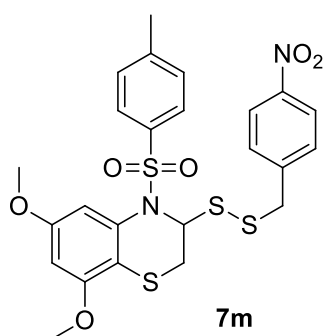

Chromatography: DCM/Toluene 1/2 ( $R_f = 0.35$ ), Yield 0.082g, 29% (Table S4 entry 3), thick yellow oil

$^1\text{H NMR}$  (400 MHz,  $\text{CDCl}_3$ )  $\delta$  8.19 (d,  $J = 8.7$  Hz, 2H), 7.51 – 7.44 (m, 4H), 7.21 (d,  $J = 8.0$  Hz, 2H), 7.13 (d,  $J = 2.4$  Hz, 1H), 6.39 (d,  $J = 2.4$  Hz, 1H), 5.81 (t,  $J = 5.4$  Hz, 1H), 4.16 – 4.06 (m, 2H), 3.84 (s, 6H), 2.94 (ddd,  $J = 29.1, 13.3, 5.4$  Hz, 2H), 2.41 (s, 3H).

$^{13}\text{C NMR}$  (101 MHz,  $\text{CDCl}_3$ )  $\delta$  158.1, 156.2, 144.7, 144.5, 135.4, 133.3, 130.3, 129.7, 127.4, 123.8, 105.1, 97.3, 65.5, 56.1, 55.7, 42.3, 31.2, 21.6.

IR (ATR): 2873(w), 2850(w), 1596(m), 1577(m), 1542(m), 1517(m), 1454(w), 1433(w), 1342(vs), 1309(m), 1229(m), 1218(vs), 1201(s), 1186(m), 1095(m), 959(w), 620(w), 579(s), 540(s)  $\text{cm}^{-1}$

HRMS (ESI):  $m/z$  [ $M + H$ ] $^+$  calcd for  $\text{C}_{24}\text{H}_{25}\text{N}_2\text{O}_6\text{S}_4$ : 565.0590; found: 565.0591.

### 3-(4-methoxybenzyl)disulfanyl)-6,8-dimethoxy-4-(4-toluenesulfonyl)-3,4-dihydro-2H-benzo[1,4]thiazine 7n

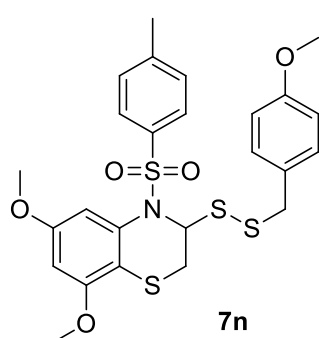

Chromatography: Toluene ( $R_f = 0.21$ ), Yield 0.074g, 27% (Table S4 entry 4), thick yellow oil

$^1\text{H NMR}$  (400 MHz,  $\text{CDCl}_3$ )  $\delta$  7.49 (d,  $J = 8.3$  Hz, 2H), 7.28 (d,  $J = 8.6$  Hz, 2H), 7.21 (d,  $J = 8.1$  Hz, 2H), 7.07 (d,  $J = 2.4$  Hz, 1H), 6.88 (t,  $J = 7.3$  Hz, 2H), 6.38 (d,  $J = 2.4$  Hz, 1H), 5.67 (t,  $J = 5.3$  Hz, 1H), 4.13–3.92 (m, 2H), 3.84 (s, 3H), 3.83 (s, 3H), 3.82 (s, 3H), 2.91 (d,  $J = 5.3$  Hz, 2H), 2.40 (s, 3H).

$^{13}\text{C NMR}$  (101 MHz,  $\text{CDCl}_3$ )  $\delta$  159.1, 157.8, 156.0, 144.3, 135.8, 133.3, 130.7, 129.6, 128.9, 127.4, 114.1, 109.3, 105.2, 97.5, 64.9, 56.1, 55.7, 55.3, 43.2, 30.9, 21.6.

IR (ATR): 2998(w), 2836(w), 2361(w), 2331(w), 1596(m), 1577(m), 1510(m), 1454(m), 1355(w), 1303(w), 1248(w), 1200(vs), 1161(s), 1087(s), 1031(s), 958(w), 703(m), 664(m), 540(s)  $\text{cm}^{-1}$

HRMS (ESI):  $m/z$  [ $M + H$ ] $^+$  calcd for  $\text{C}_{25}\text{H}_{26}\text{NO}_5\text{S}_4$ : 550.0845; found: 550.0851.

### 3-(benzylidysulfanyl)-6,8-dimethoxy-4-(4-toluenesulfonyl)-3,4-dihydro-2H-benzo[1,4]thiazine 7r

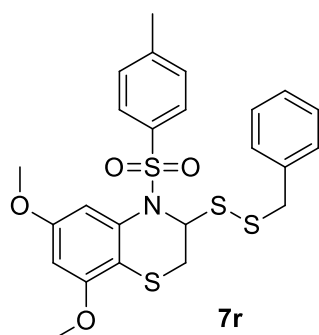

Chromatography: Toluene/Hexane 1/1 (R<sub>f</sub> = 0.4), Yield 0.065g, 25% (Table S4 entry 5), thick yellow oil

<sup>1</sup>H NMR (400 MHz, CDCl<sub>3</sub>) δ 7.50 (d, *J* = 8.3 Hz, 2H), 7.38–7.30 (m, 5H), 7.21 (d, *J* = 8.0 Hz, 2H), 7.07 (d, *J* = 2.4 Hz, 1H), 6.38 (d, *J* = 2.4 Hz, 1H), 5.70 (t, *J* = 5.3 Hz, 1H), 4.13–3.98 (m, 2H), 3.83 (s, 3H), 3.82 (s, 3H), 2.92 (dt, *J* = 10.9, 5.4 Hz, 2H), 2.41 (s, 3H).

<sup>13</sup>C NMR (101 MHz, CDCl<sub>3</sub>) δ 157.9, 156.0, 144.3, 137.0, 135.8, 133.3, 129.6, 129.5, 128.6, 127.4, 109.2, 105.2, 97.5, 65.1, 56.1, 55.7, 43.7, 31.0, 29.7, 21.6.

IR (ATR): 2923(w), 2871(w), 2850(w), 2362(w), 1596(m), 1577(m), 1453(m), 1415(m), 1378(m), 1353(m), 1284(vs), 1228(vs), 1200(s), 1185(s), 961(m), 935(m), 869(s), 766(s), 579(s) cm<sup>-1</sup>

HRMS (ESI): *m/z* [M + H]<sup>+</sup> calcd for C<sub>24</sub>H<sub>26</sub>NO<sub>4</sub>S<sub>4</sub>: 520.0739; found: 520.0743.

### References

- [1] a) J. Doroszuk, M. Musiejuk, Ł. Ponikiewski, D. Witt, *Eur. J. Org. Chem.*, **2018**: 6333; b) M. Musiejuk, J. Doroszuk, B. Jędrzejewski, G. Ortiz Nieto, M. Marin Navarro, D. Witt, *Adv. Synth. Catal.* **2020**, 362, 618-626.
- [2] A. Venker, T. Vollgraff, J. Sundermeyer, *Dalton Trans.*, **2018**, 47, 1933-1941.
- [3] M. Campo, G. Lamanna, S. Menichetti, *Synlett* **2007**, 2961-2964.

### Author Contributions

B. Jędrzejewski, leading investigator (synthesis of starting materials, disulfides and Diels-Alder reactions)  
M. Musiejuk, equal investigator (synthesis of starting materials and disulfides)  
J. Doroszuk, equal investigator (synthesis of starting materials and disulfides)  
D. Witt, principal investigator, (project management, writing of original manuscript)

### NMR SPECTRA

DWME862  
1H

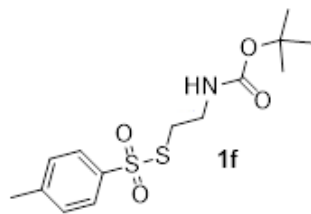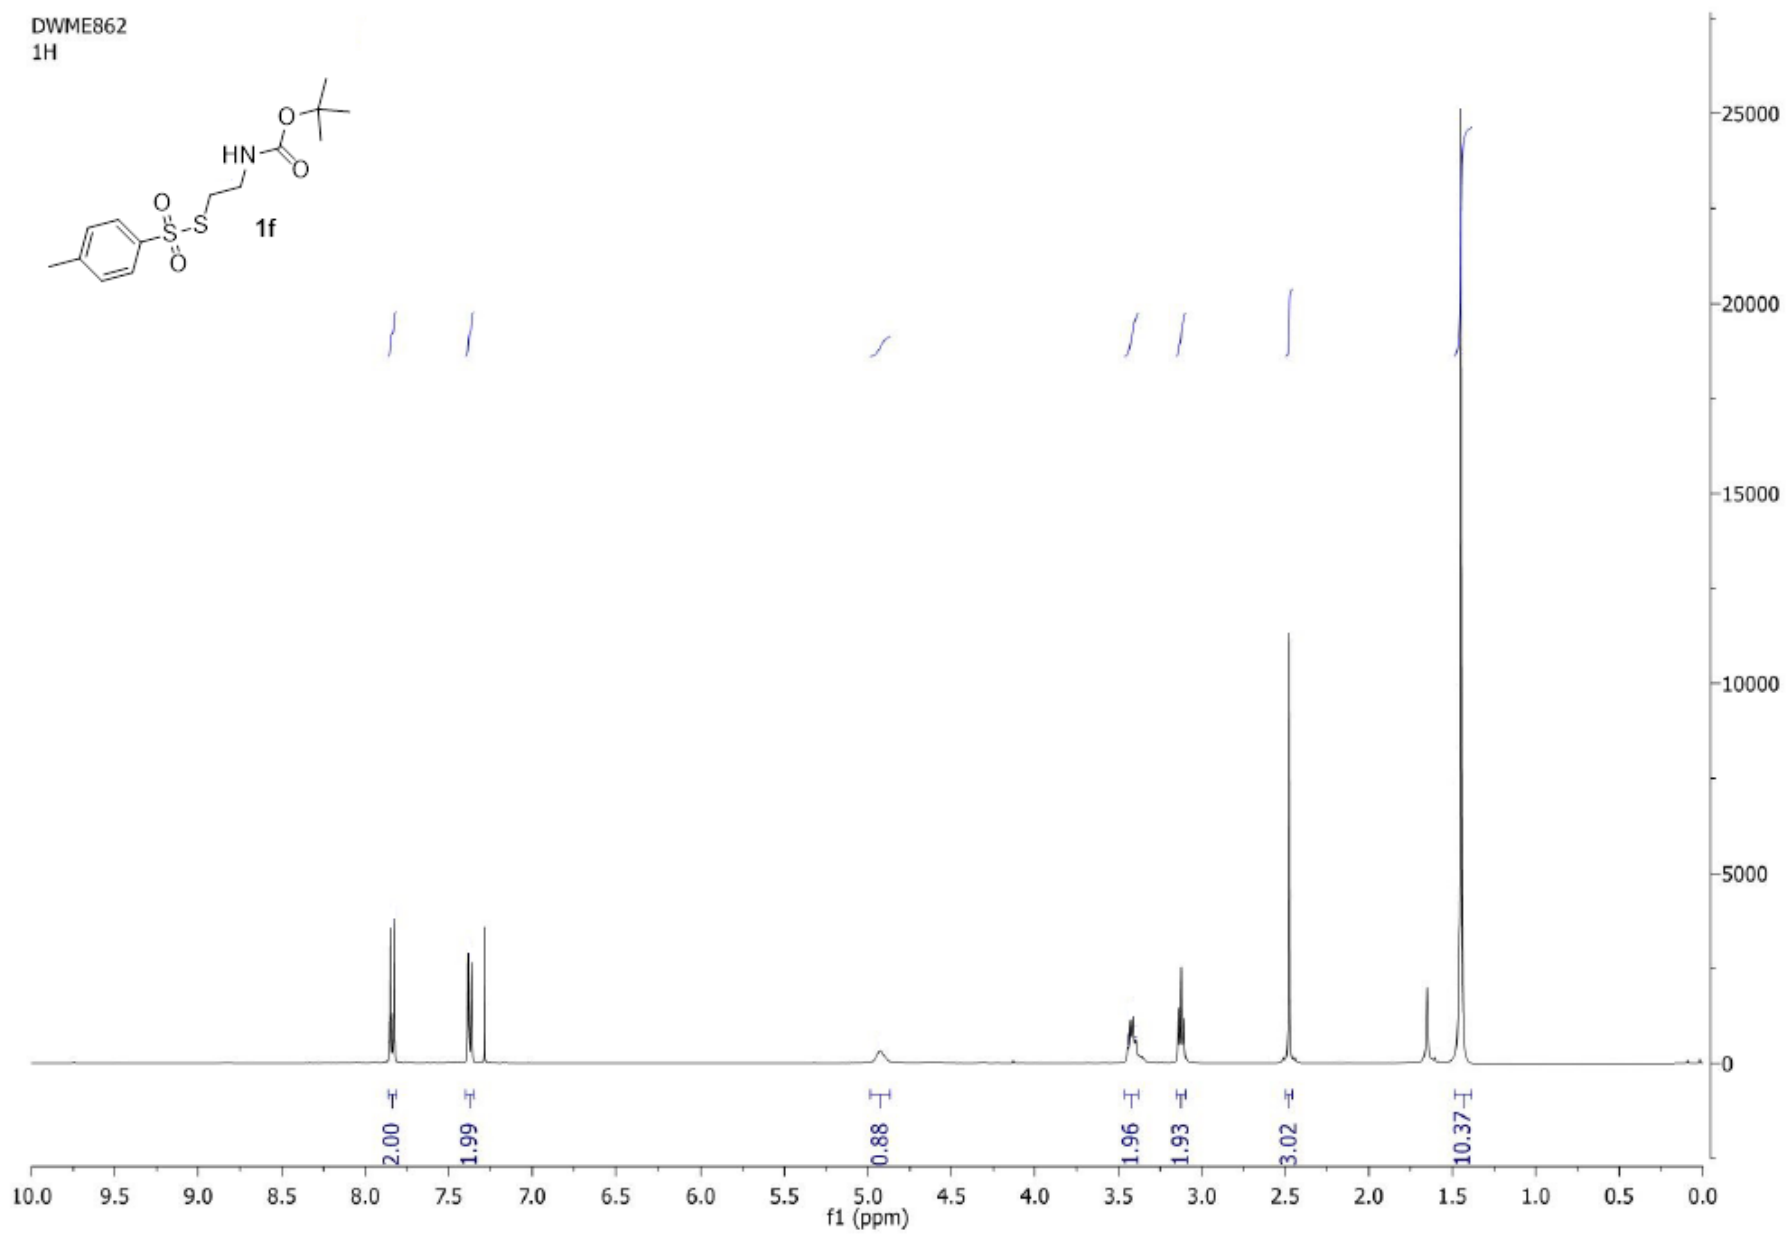

DWME862  
13C

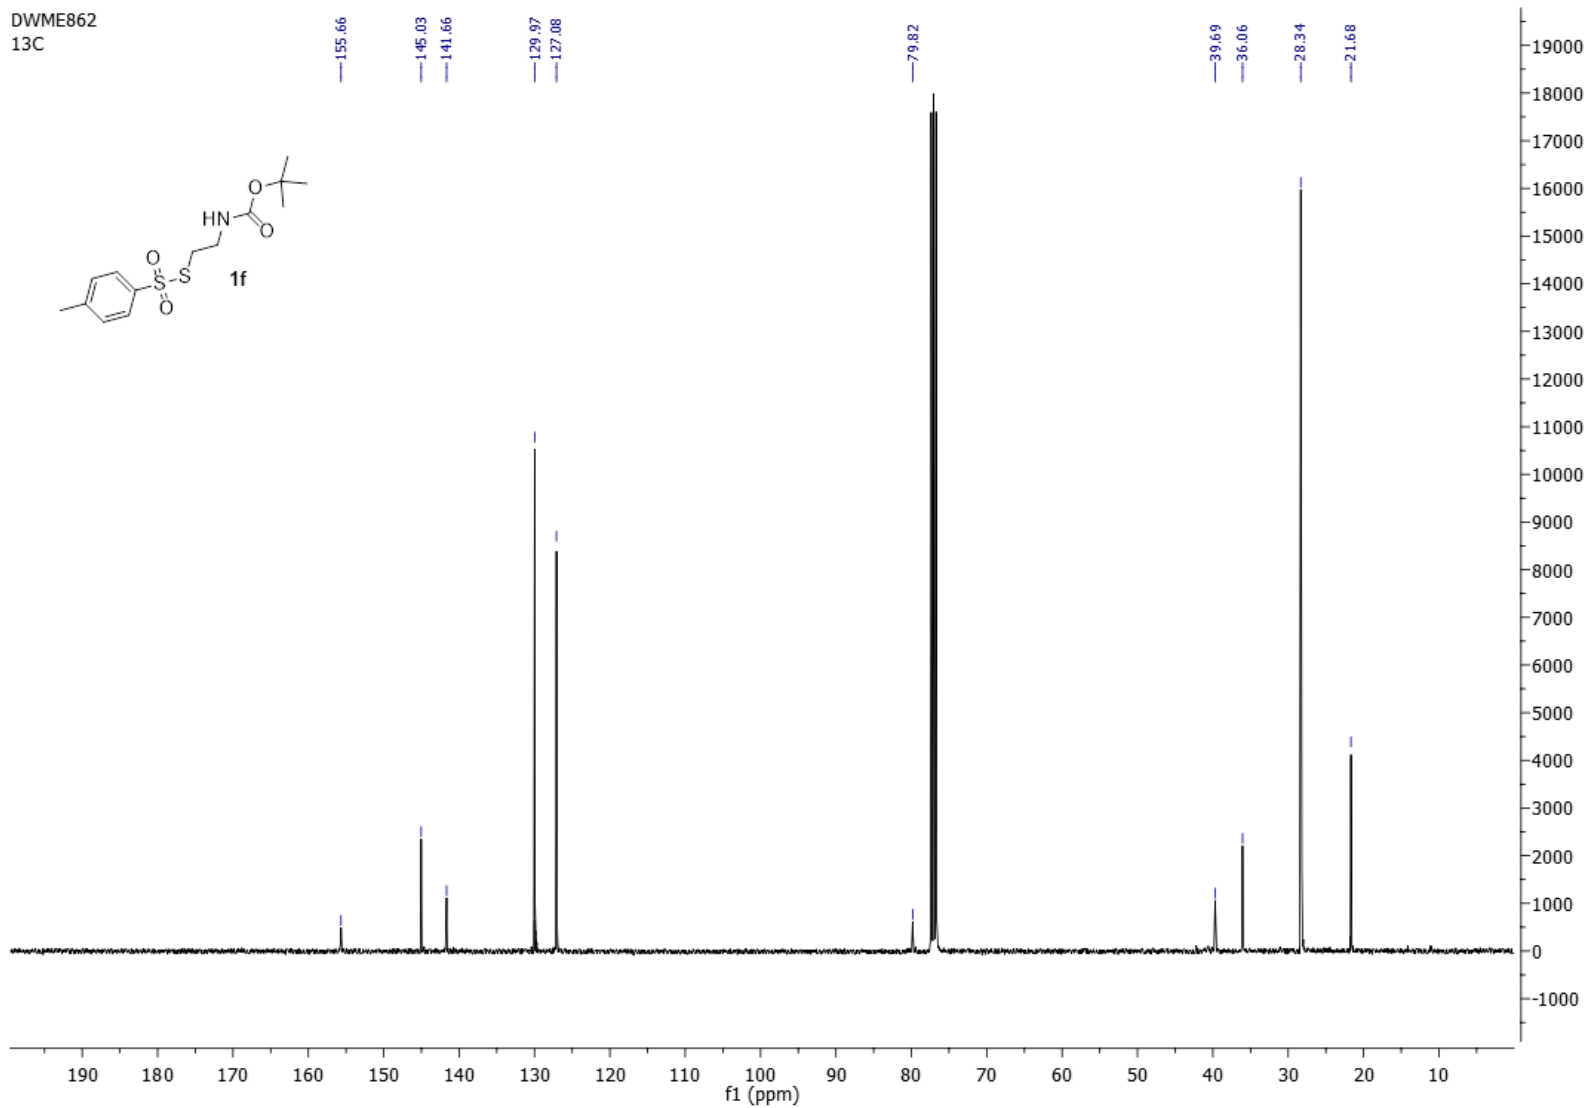



DWME861-F2  
1H

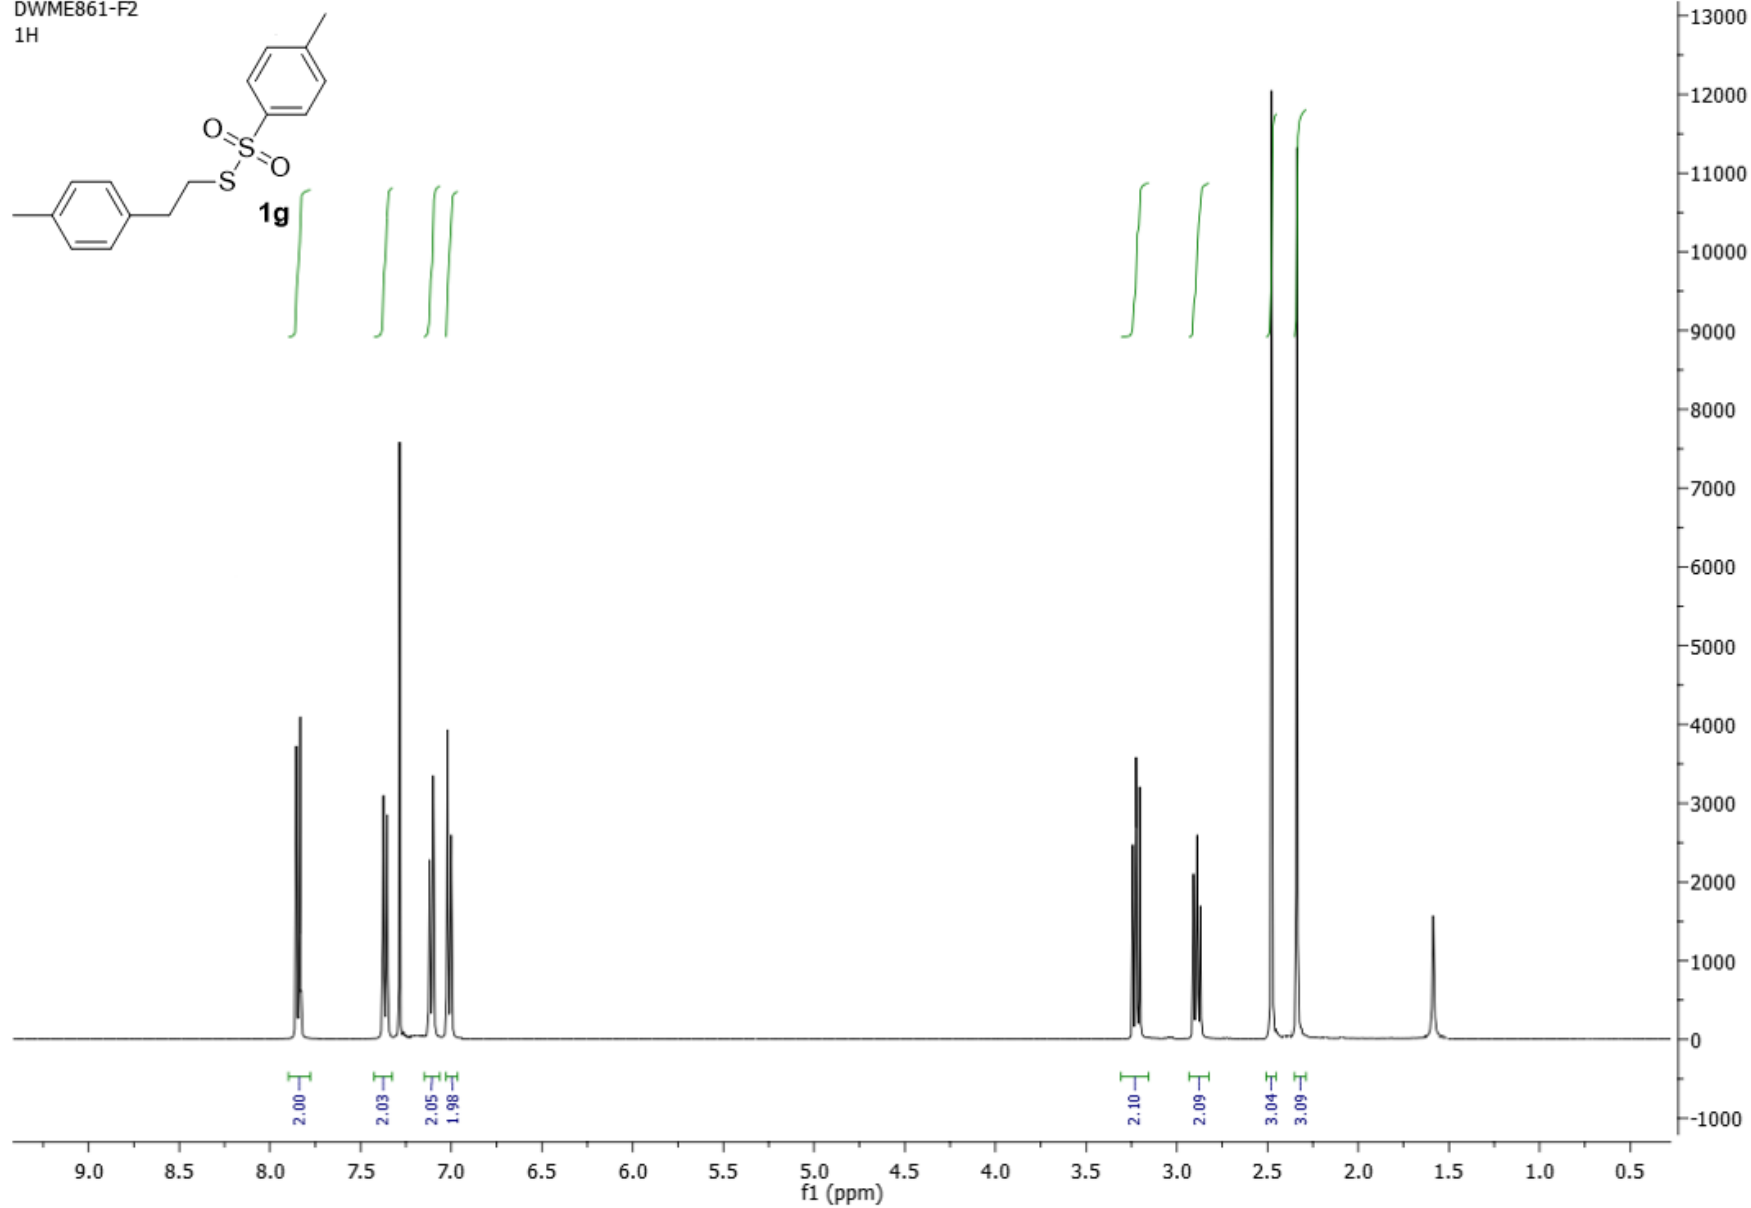

DWME861-F2  
13C

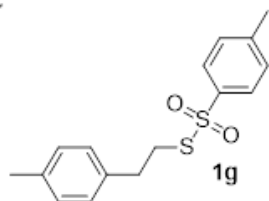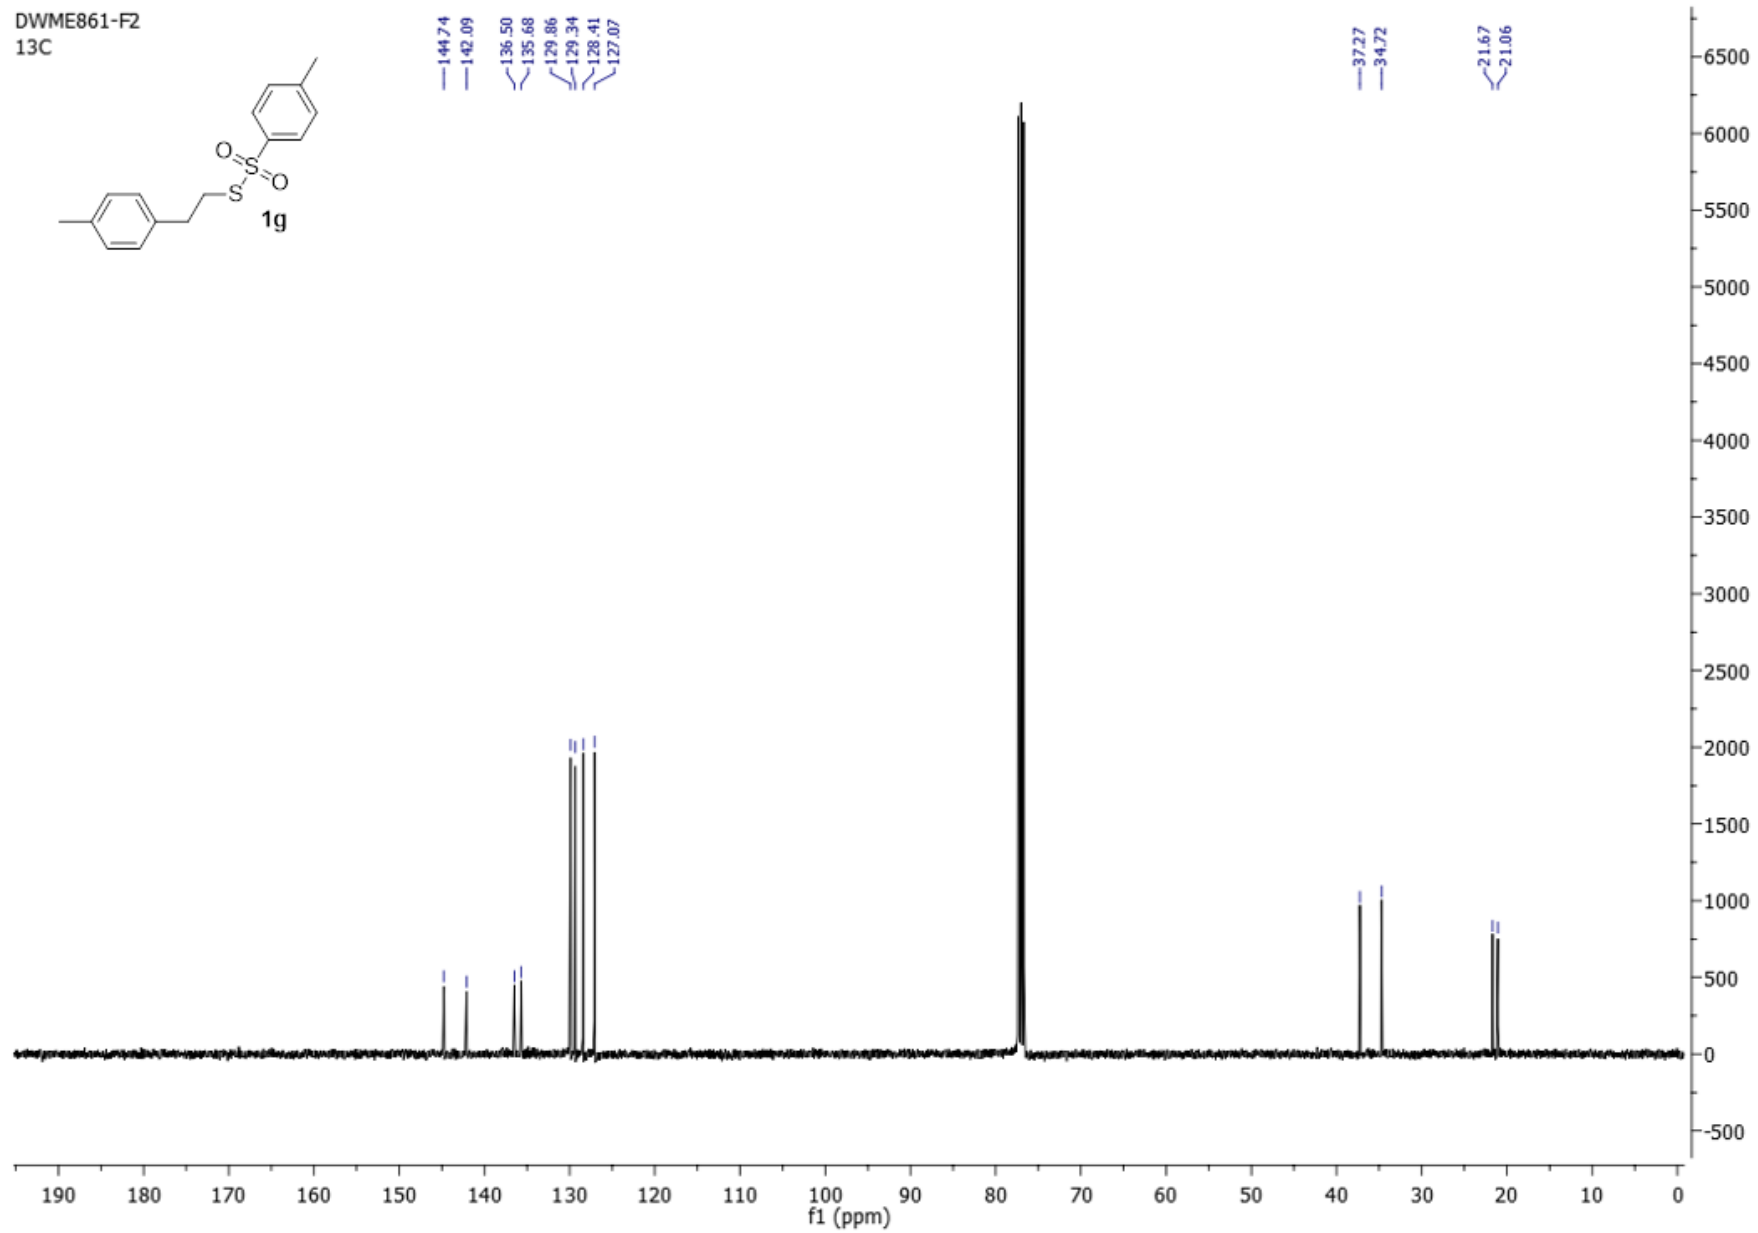

DWME868\_F2  
1H

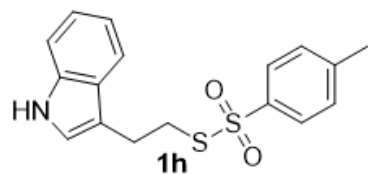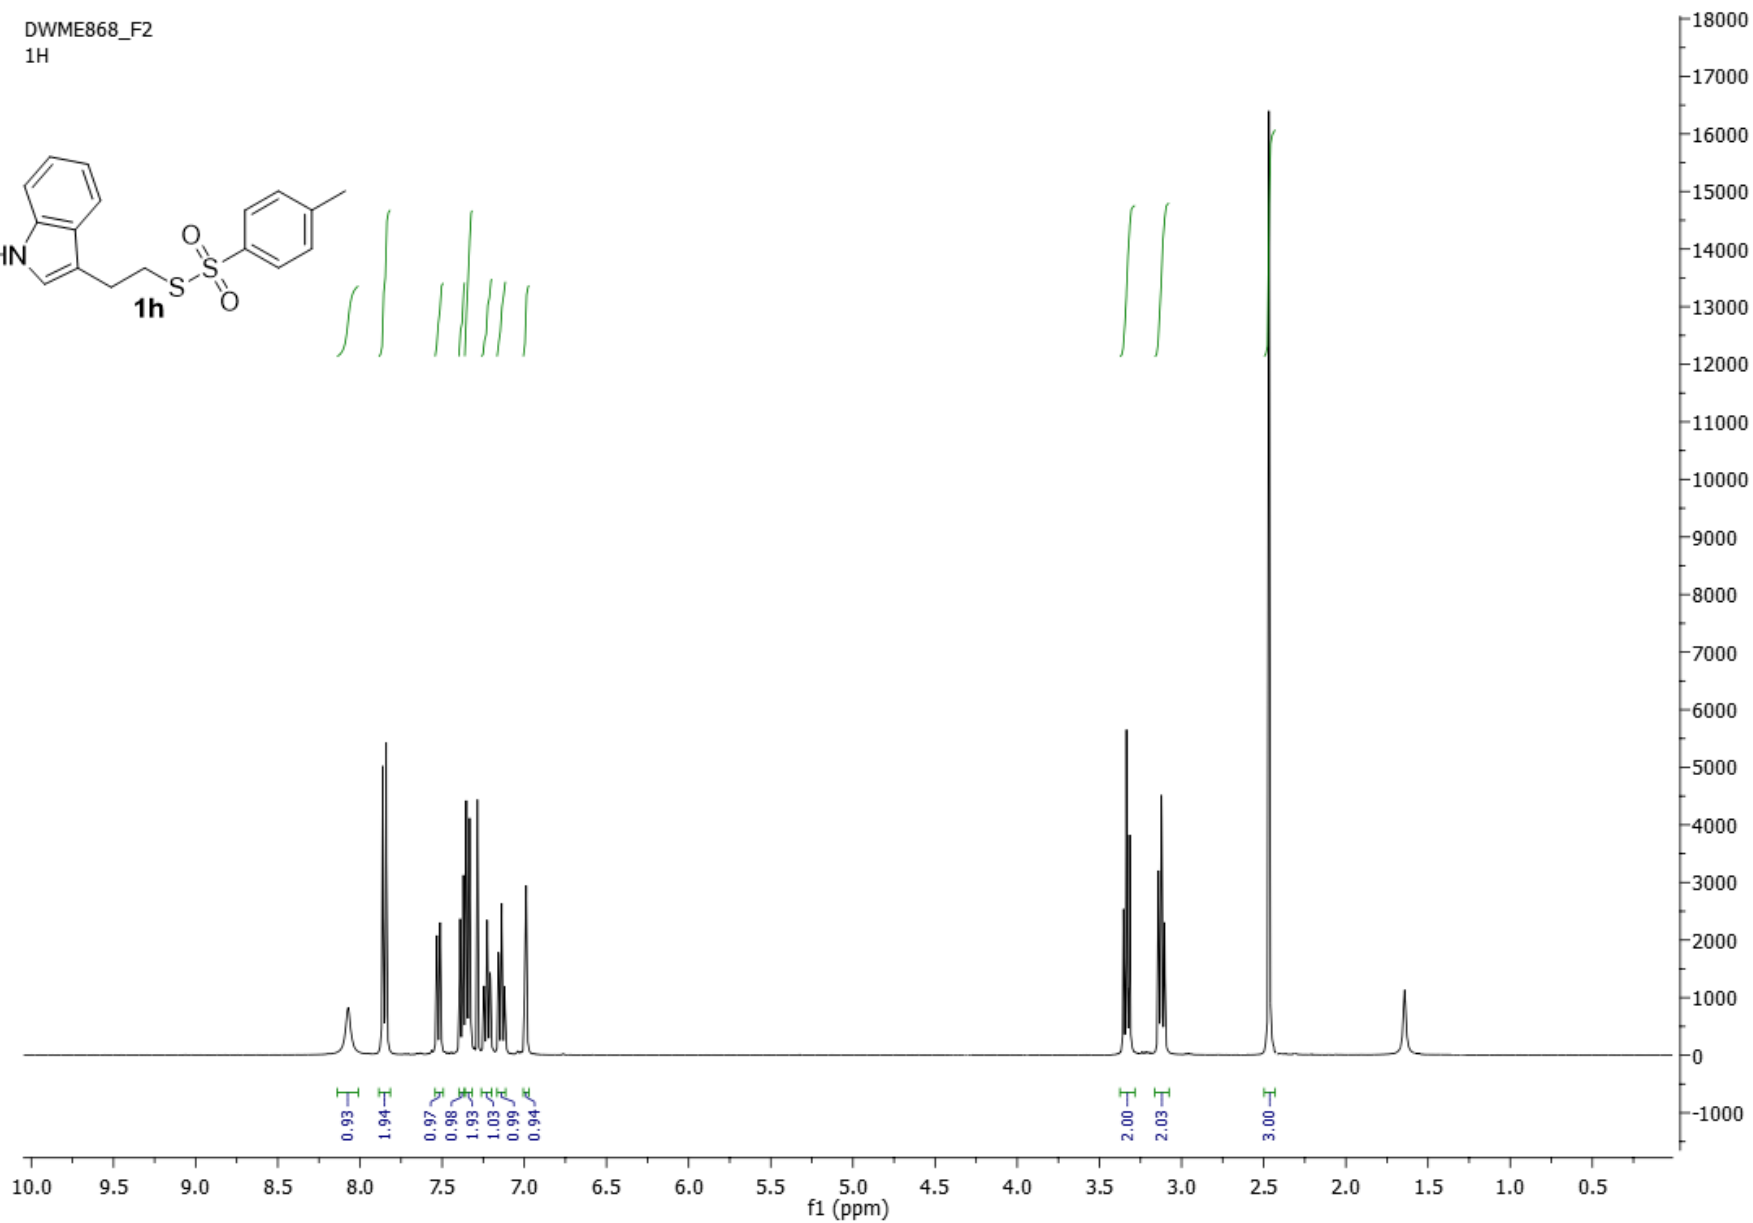

DWME868\_F2  
13C

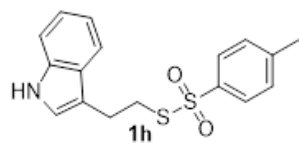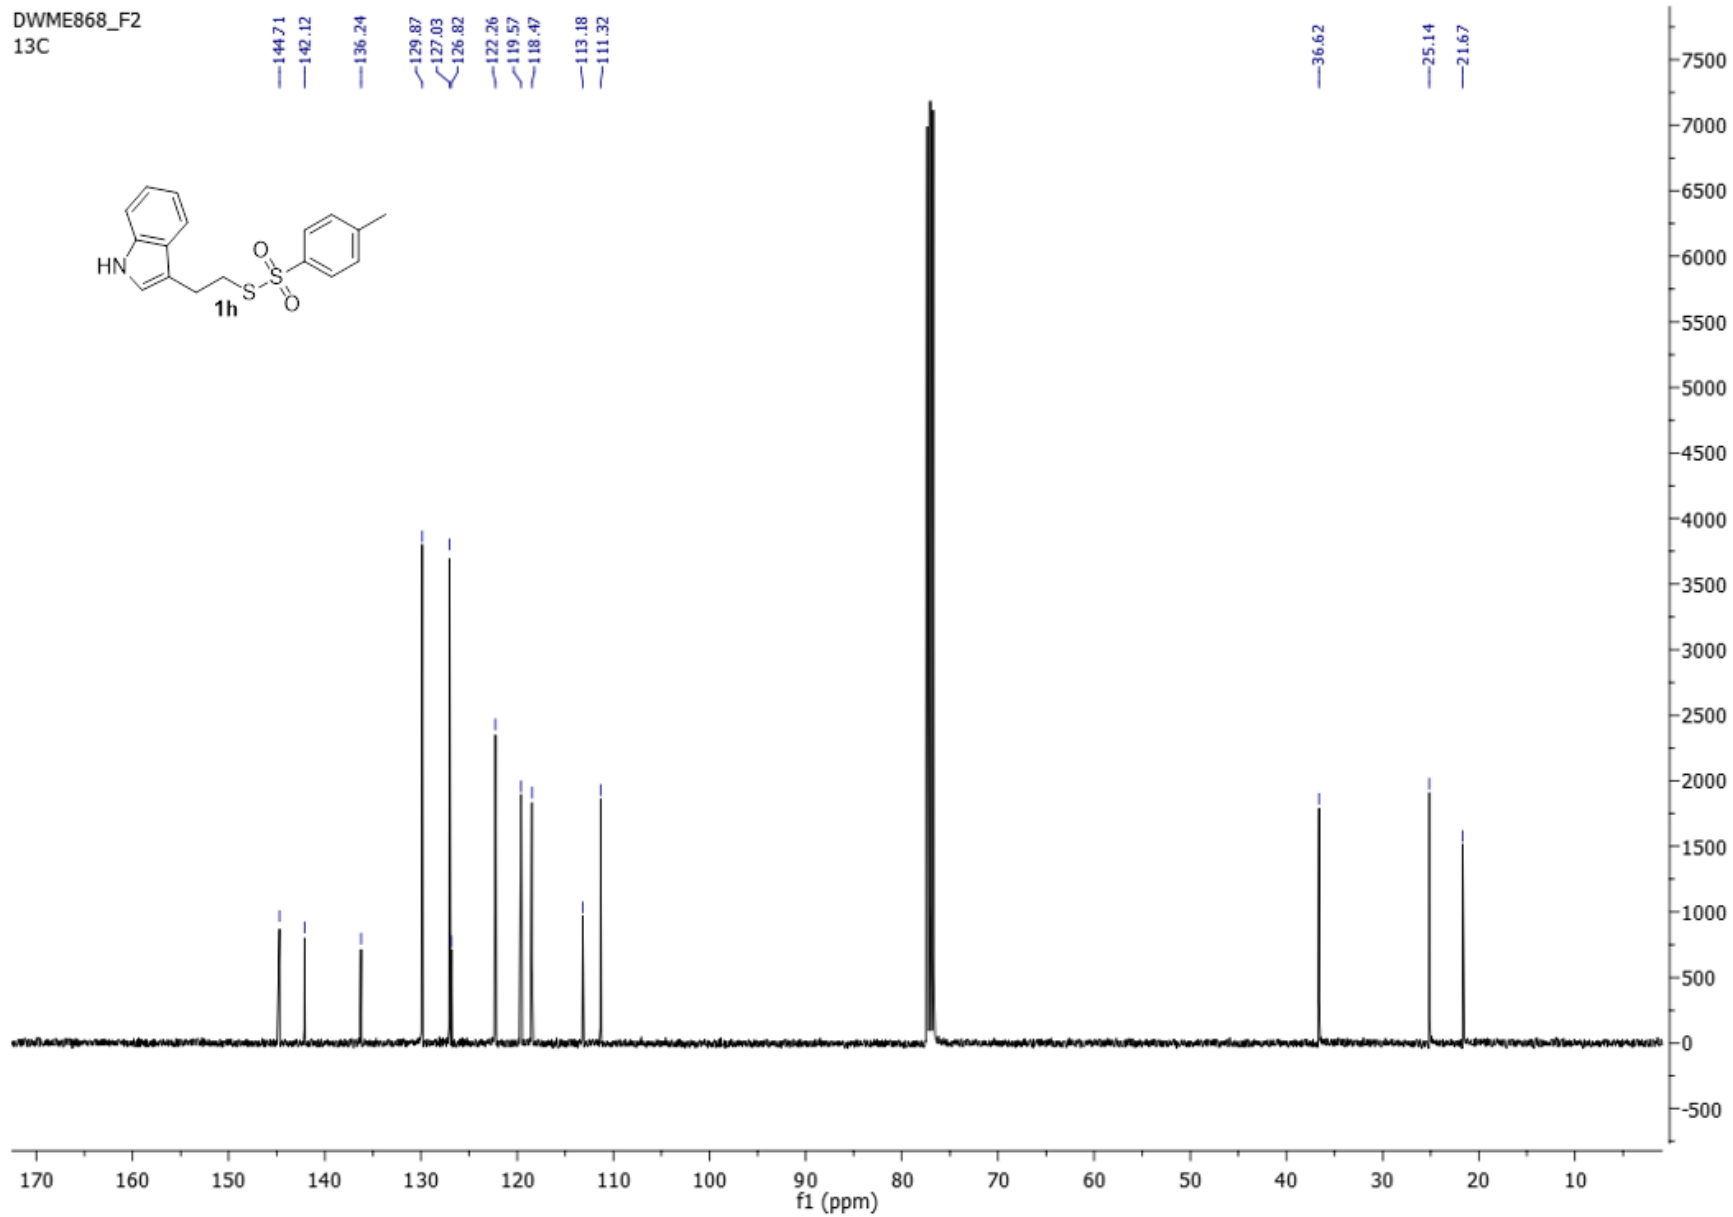

DWME871  
1H

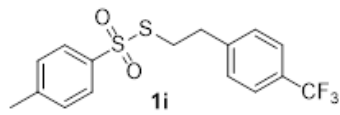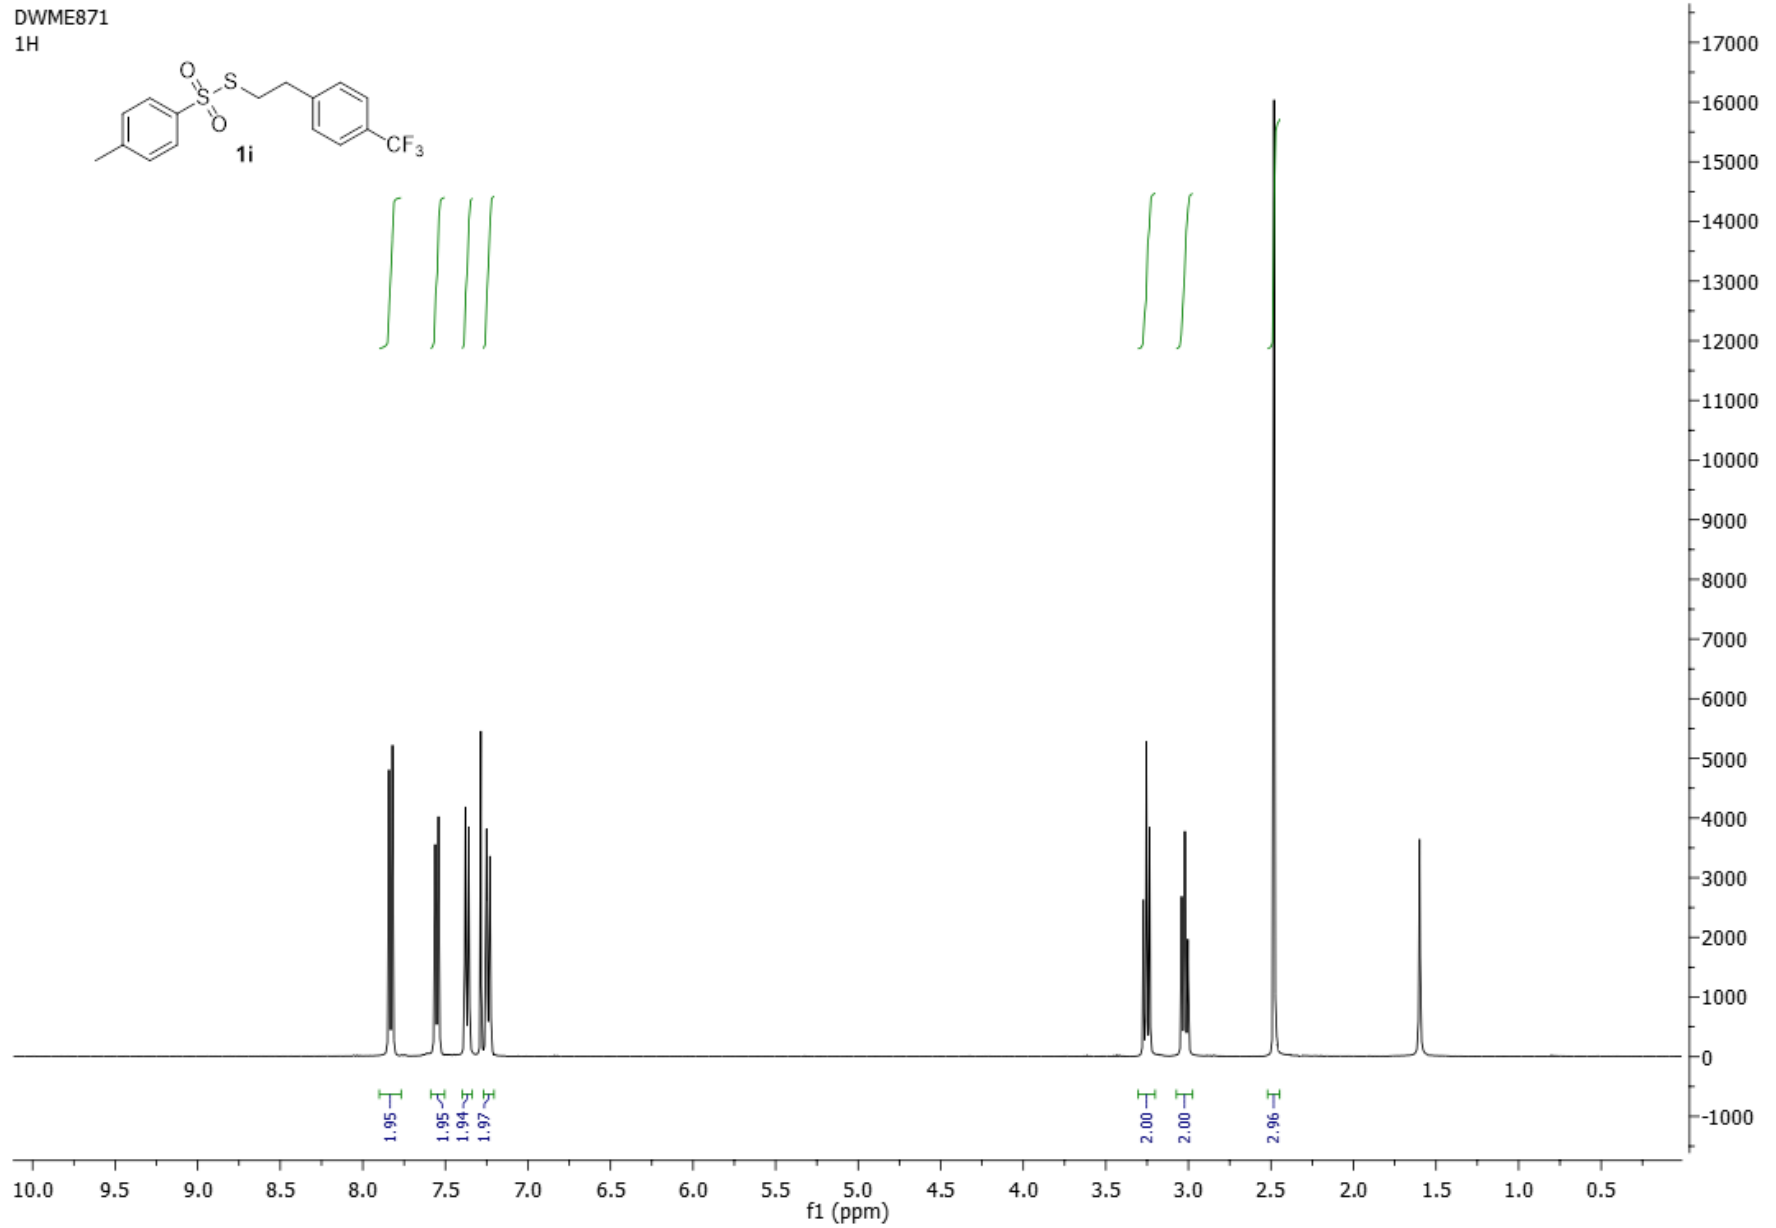

DWME871  
13C

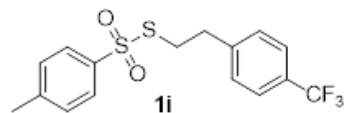

146.00  
142.70  
141.87  
129.94  
129.40  
128.97  
127.05  
125.65  
125.61  
125.57  
125.53  
122.75

36.65  
34.97

21.66

DWME871  
13C

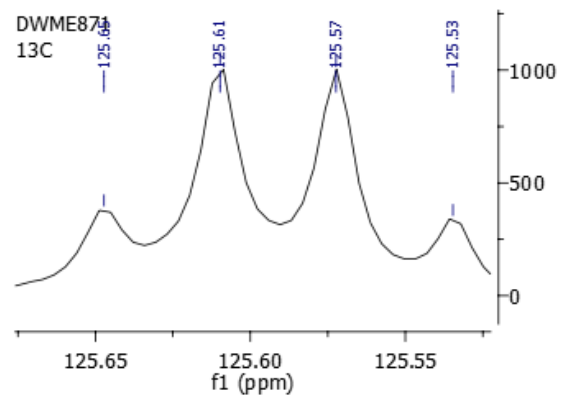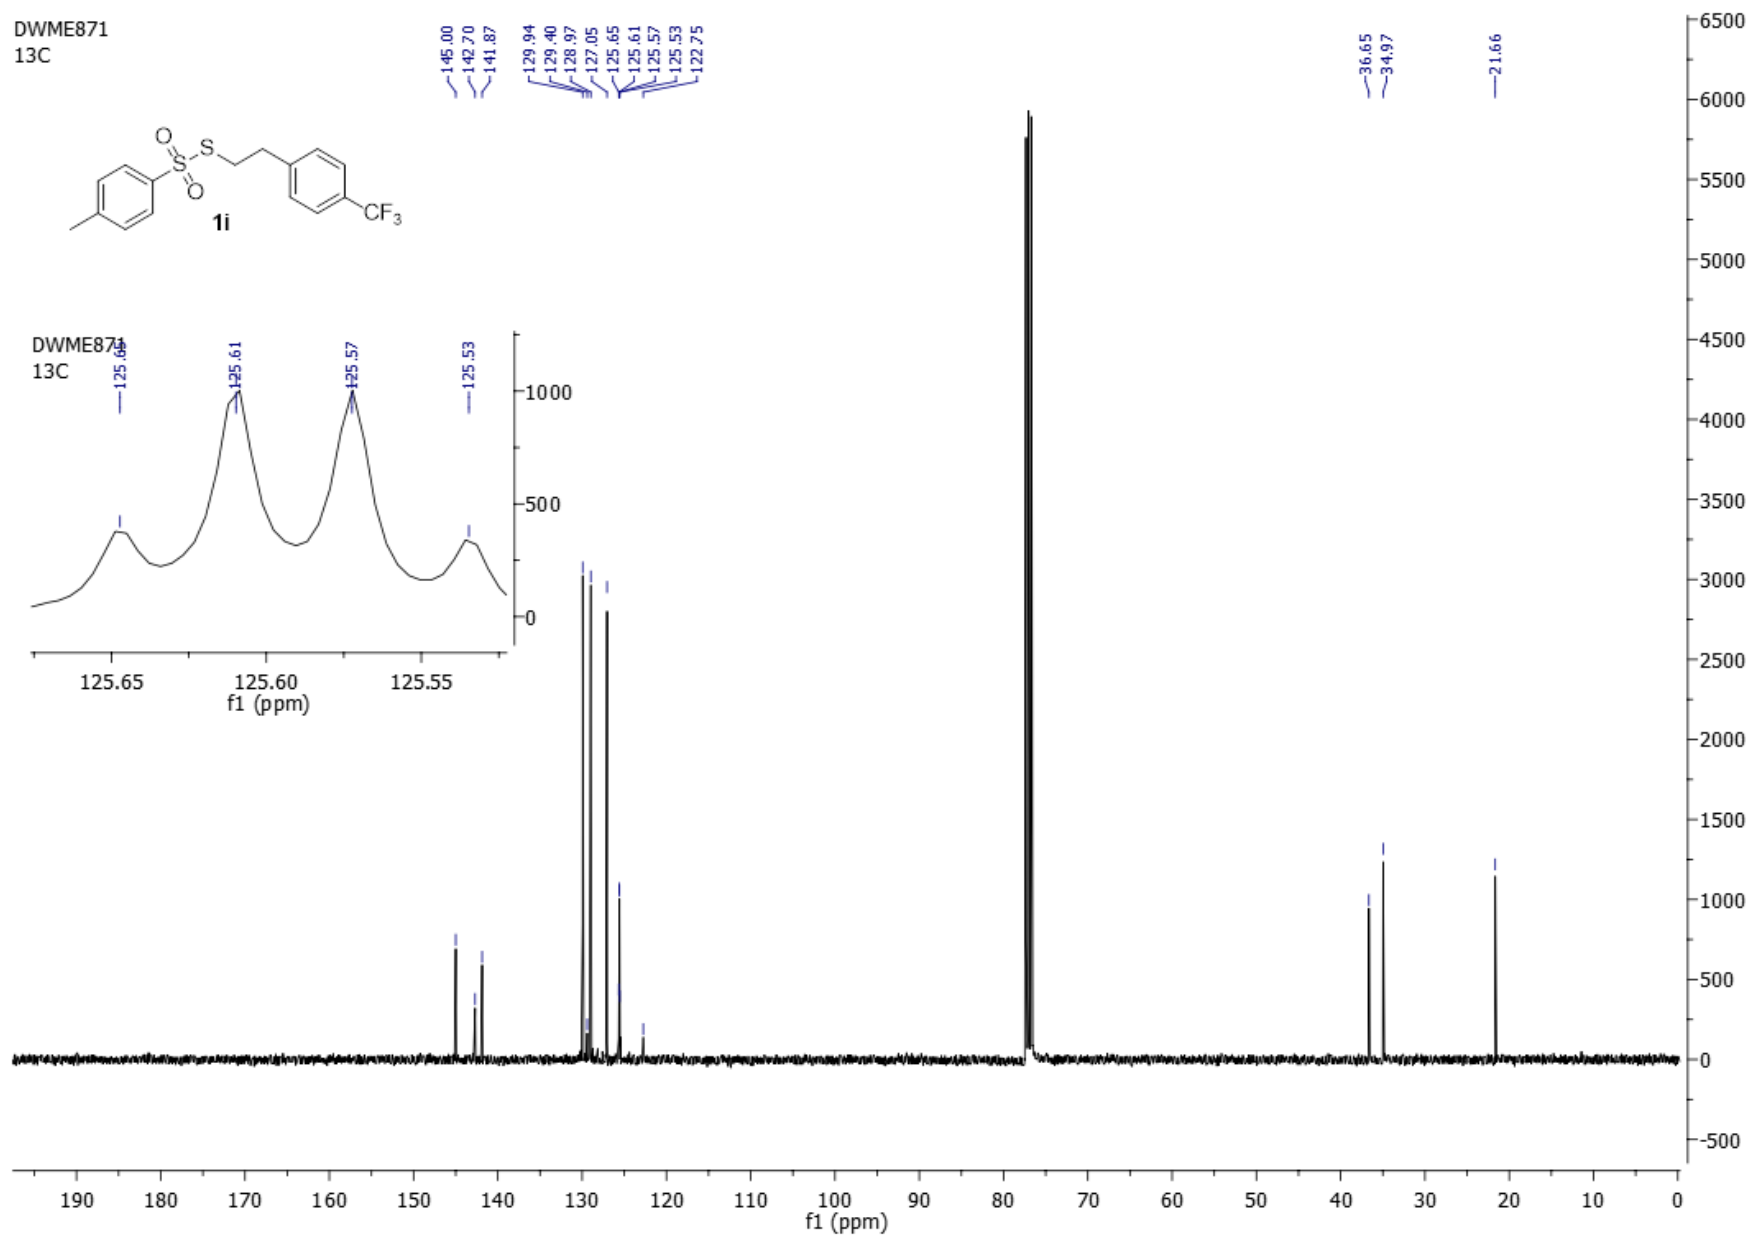

DWME869\_F2  
1H

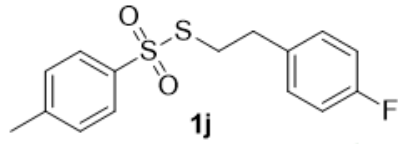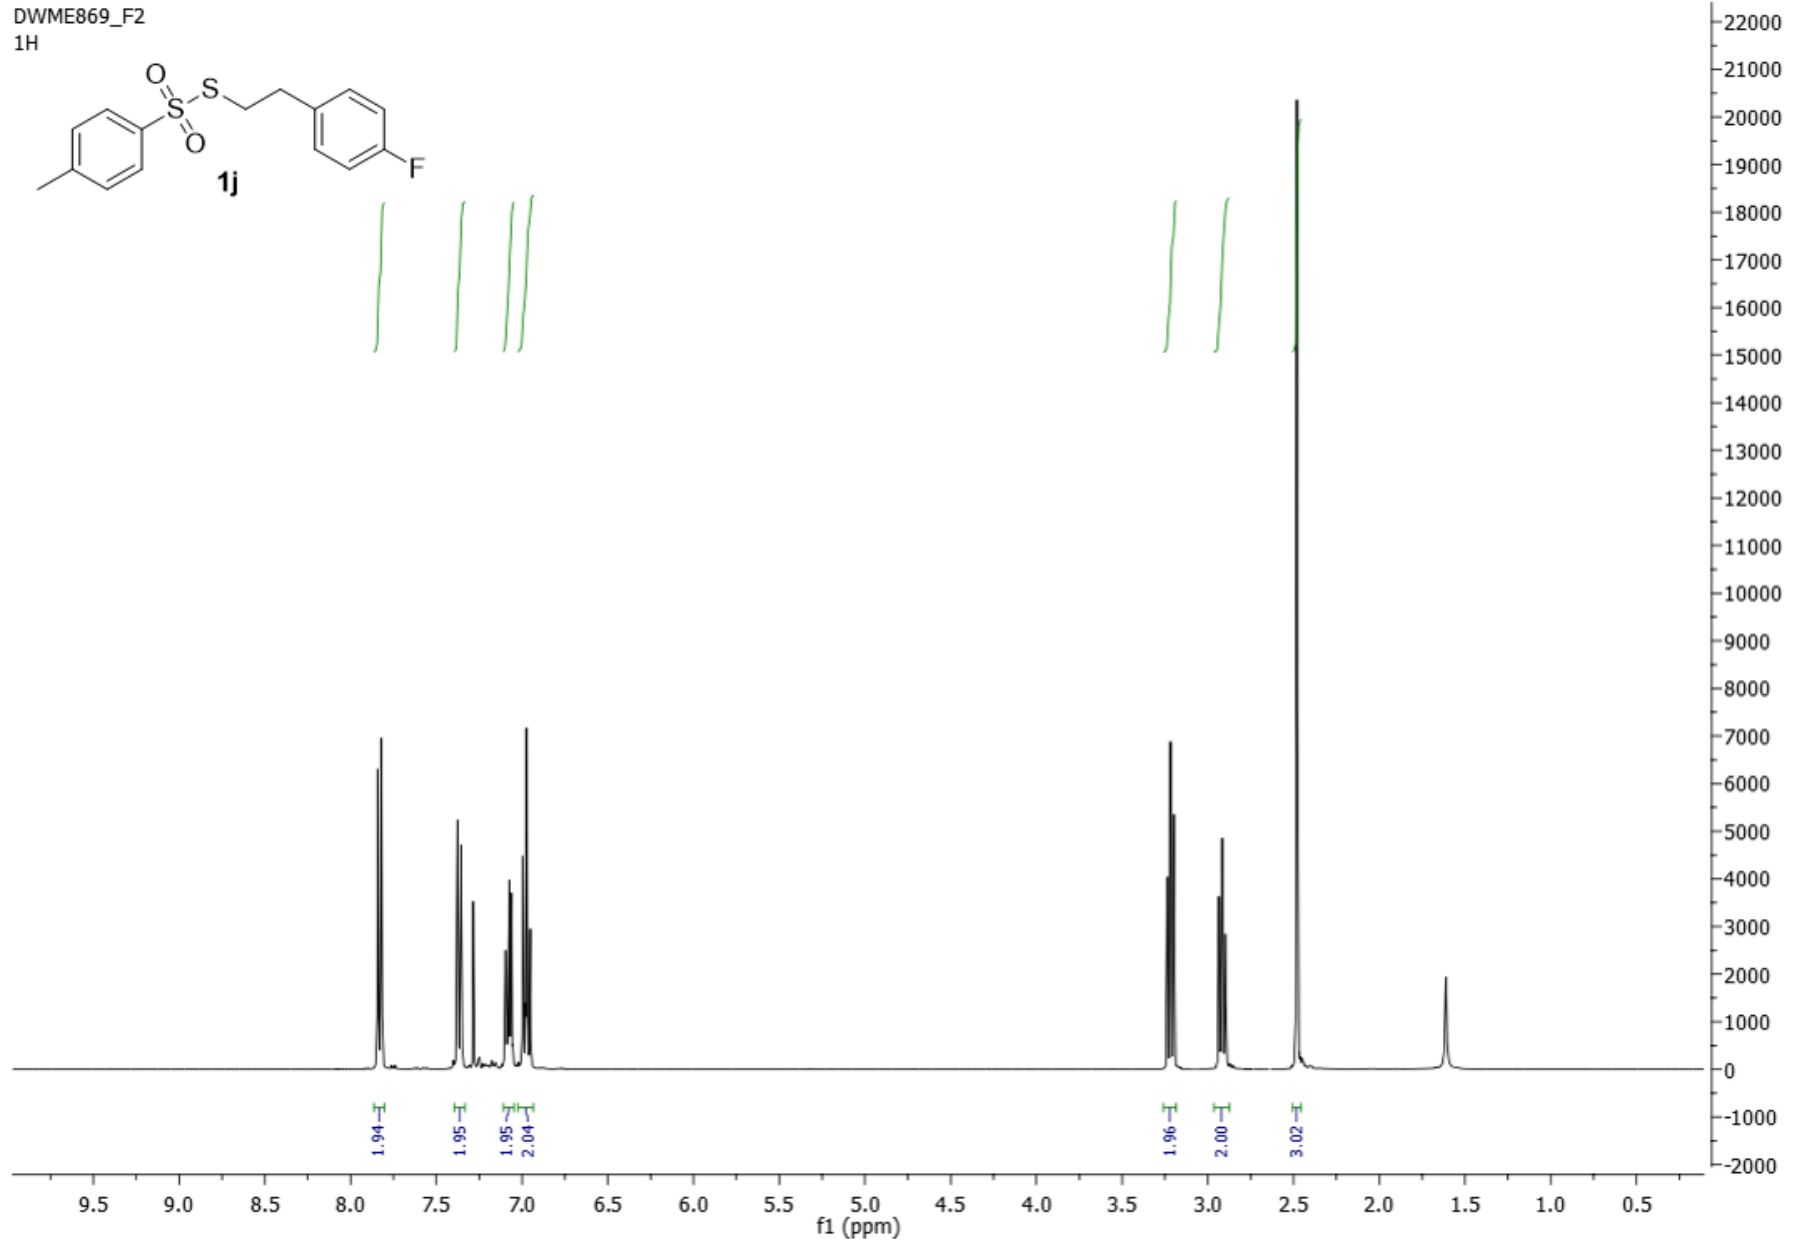

DWME869\_F2  
13C

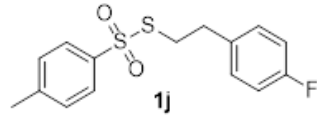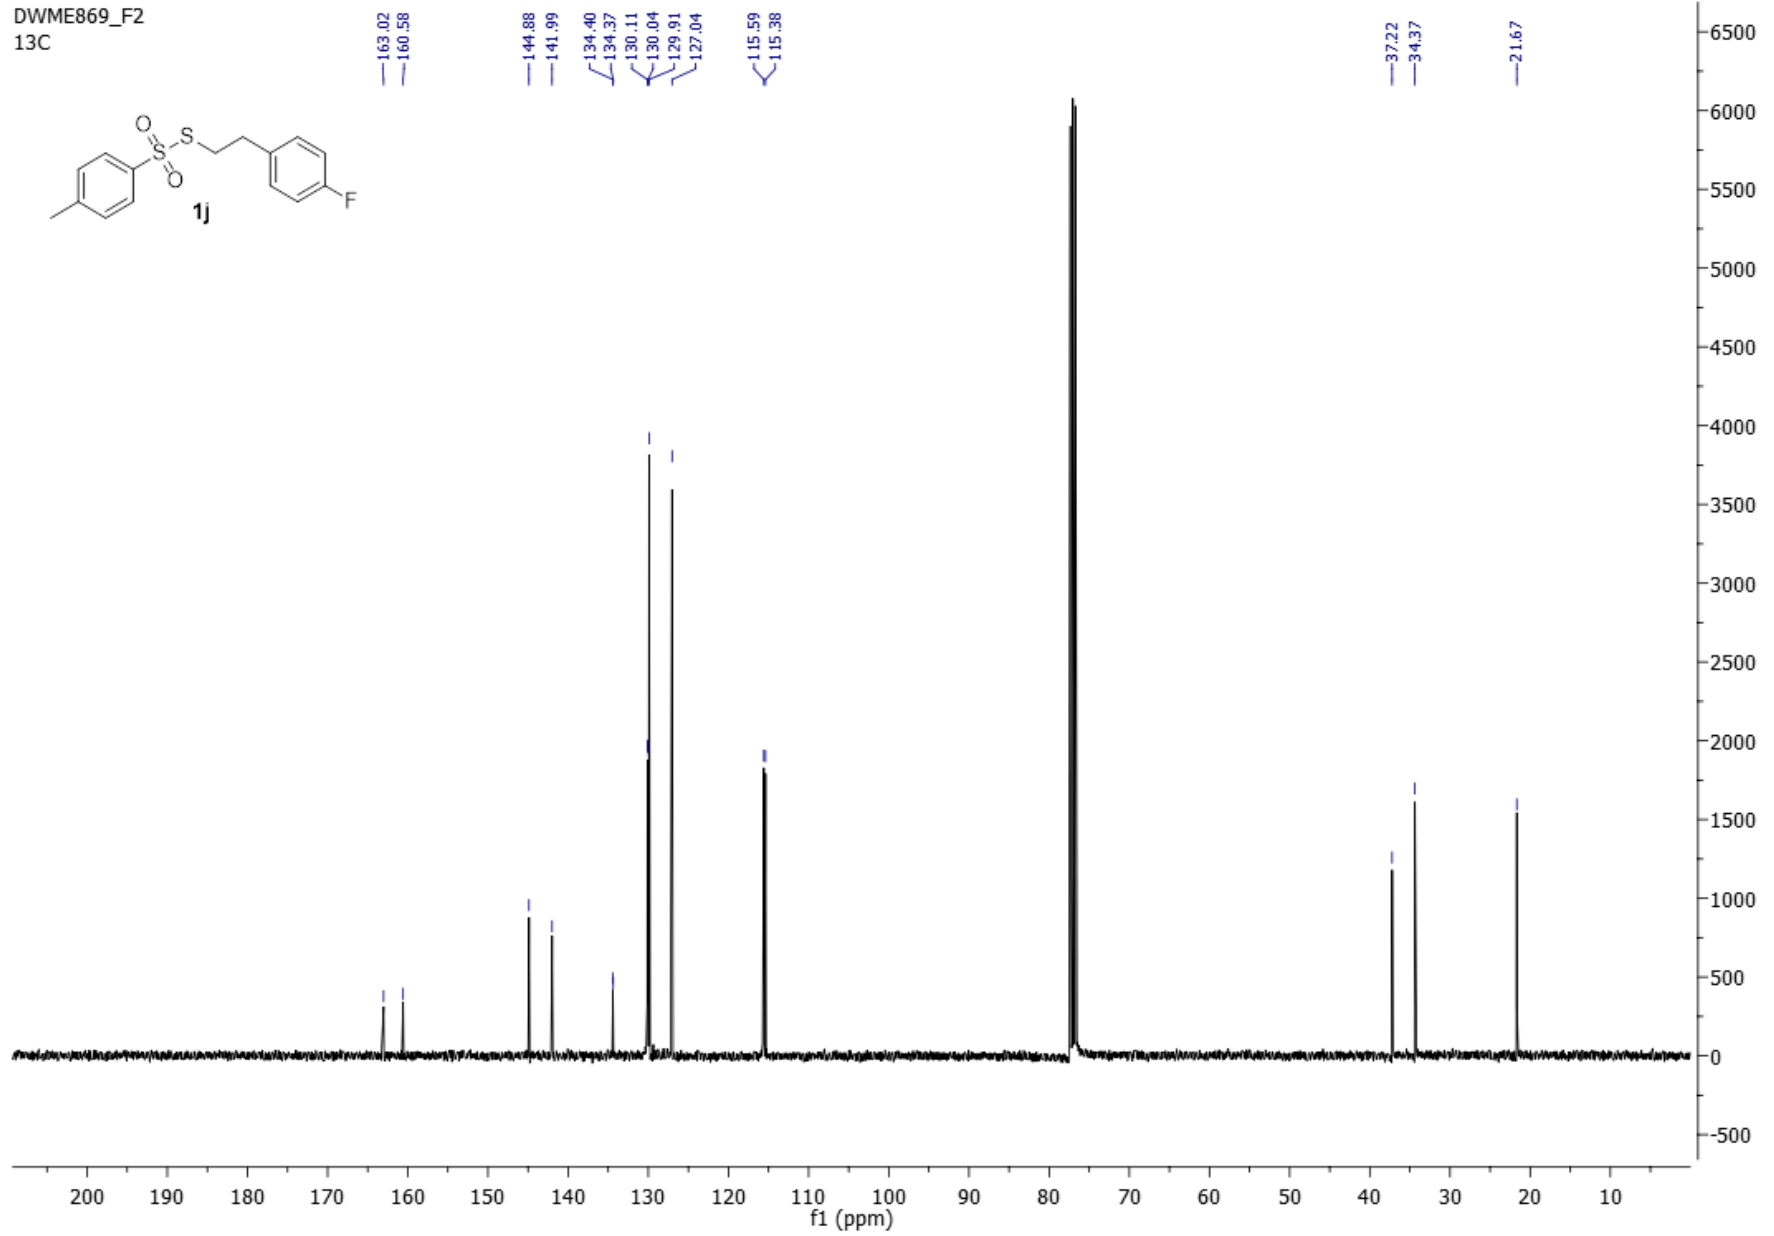



DWME8501  
1H

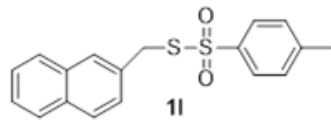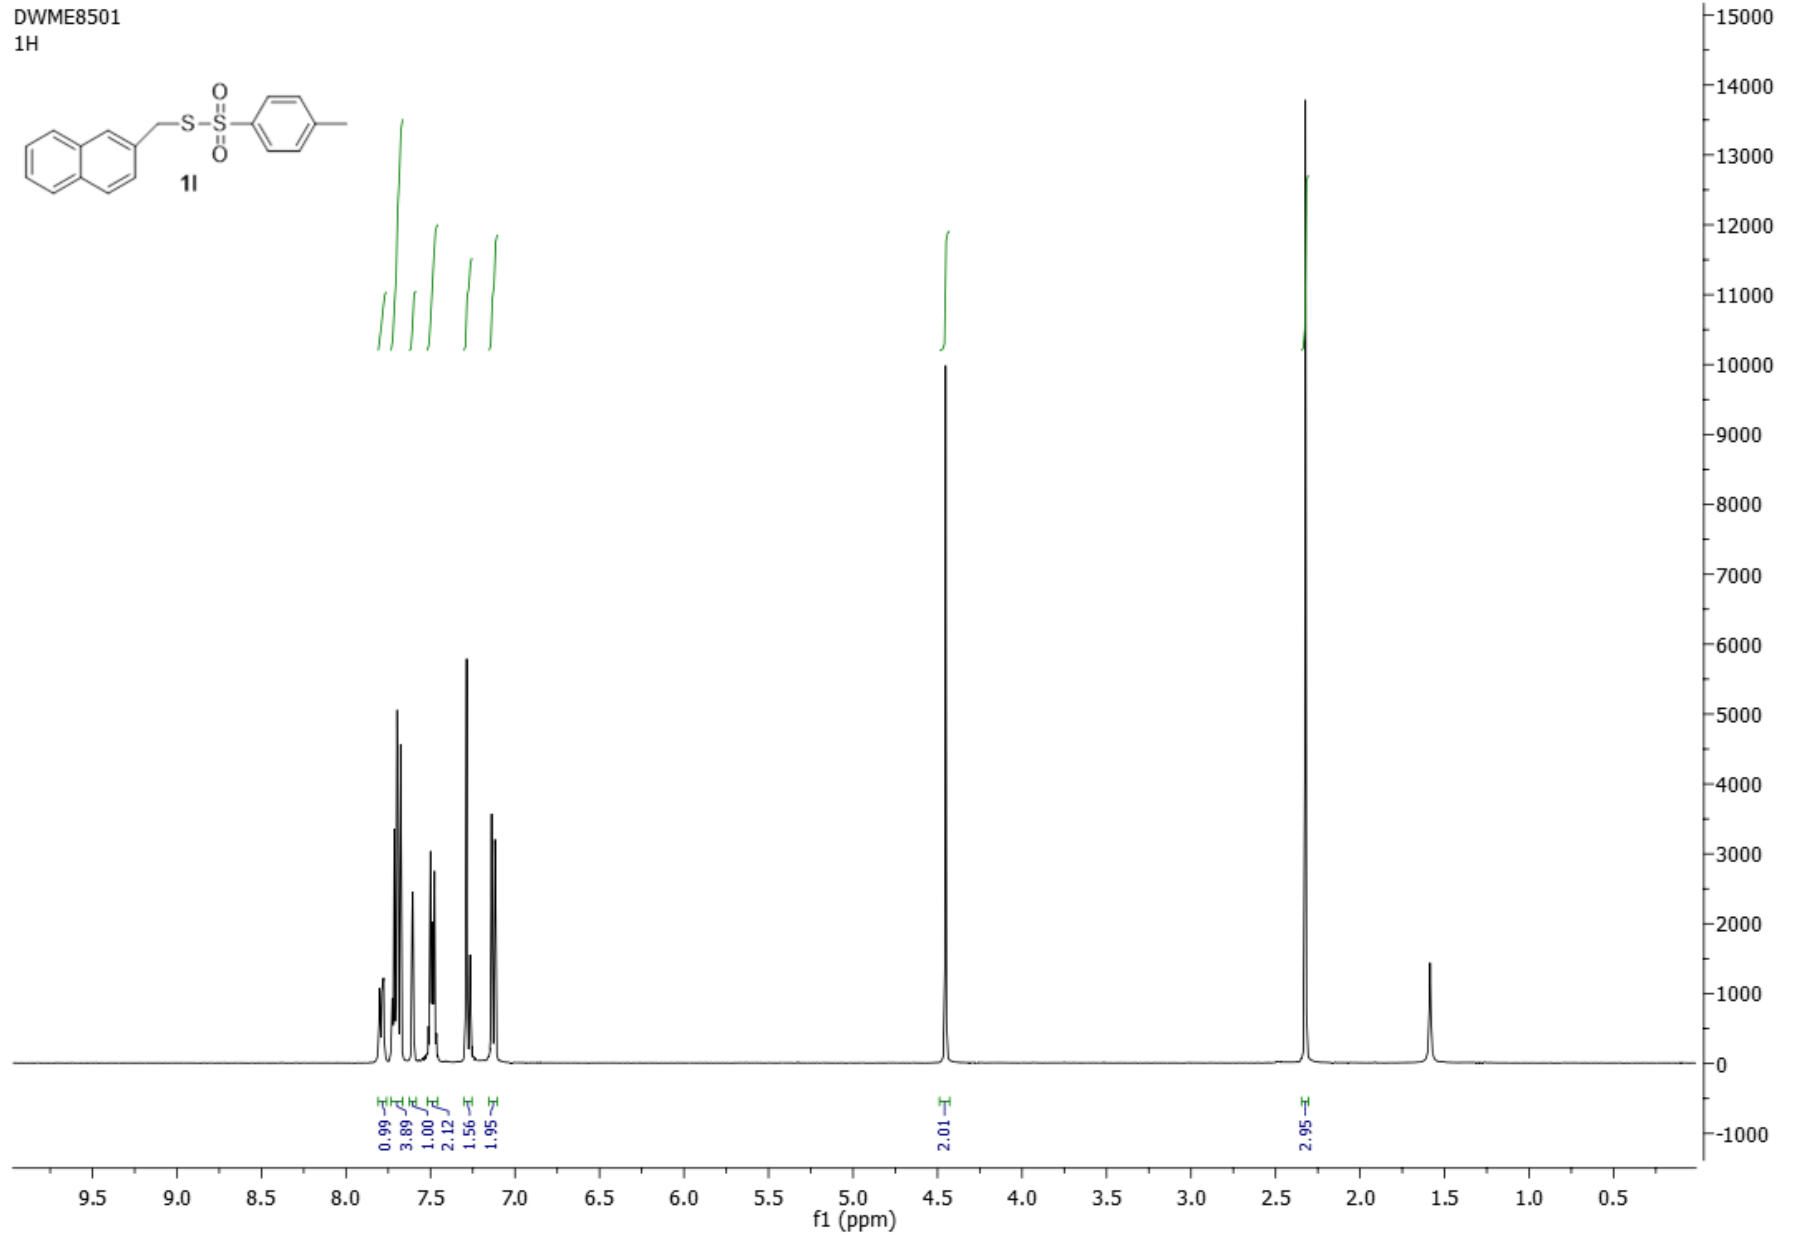

DWME8501  
13C

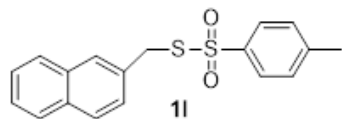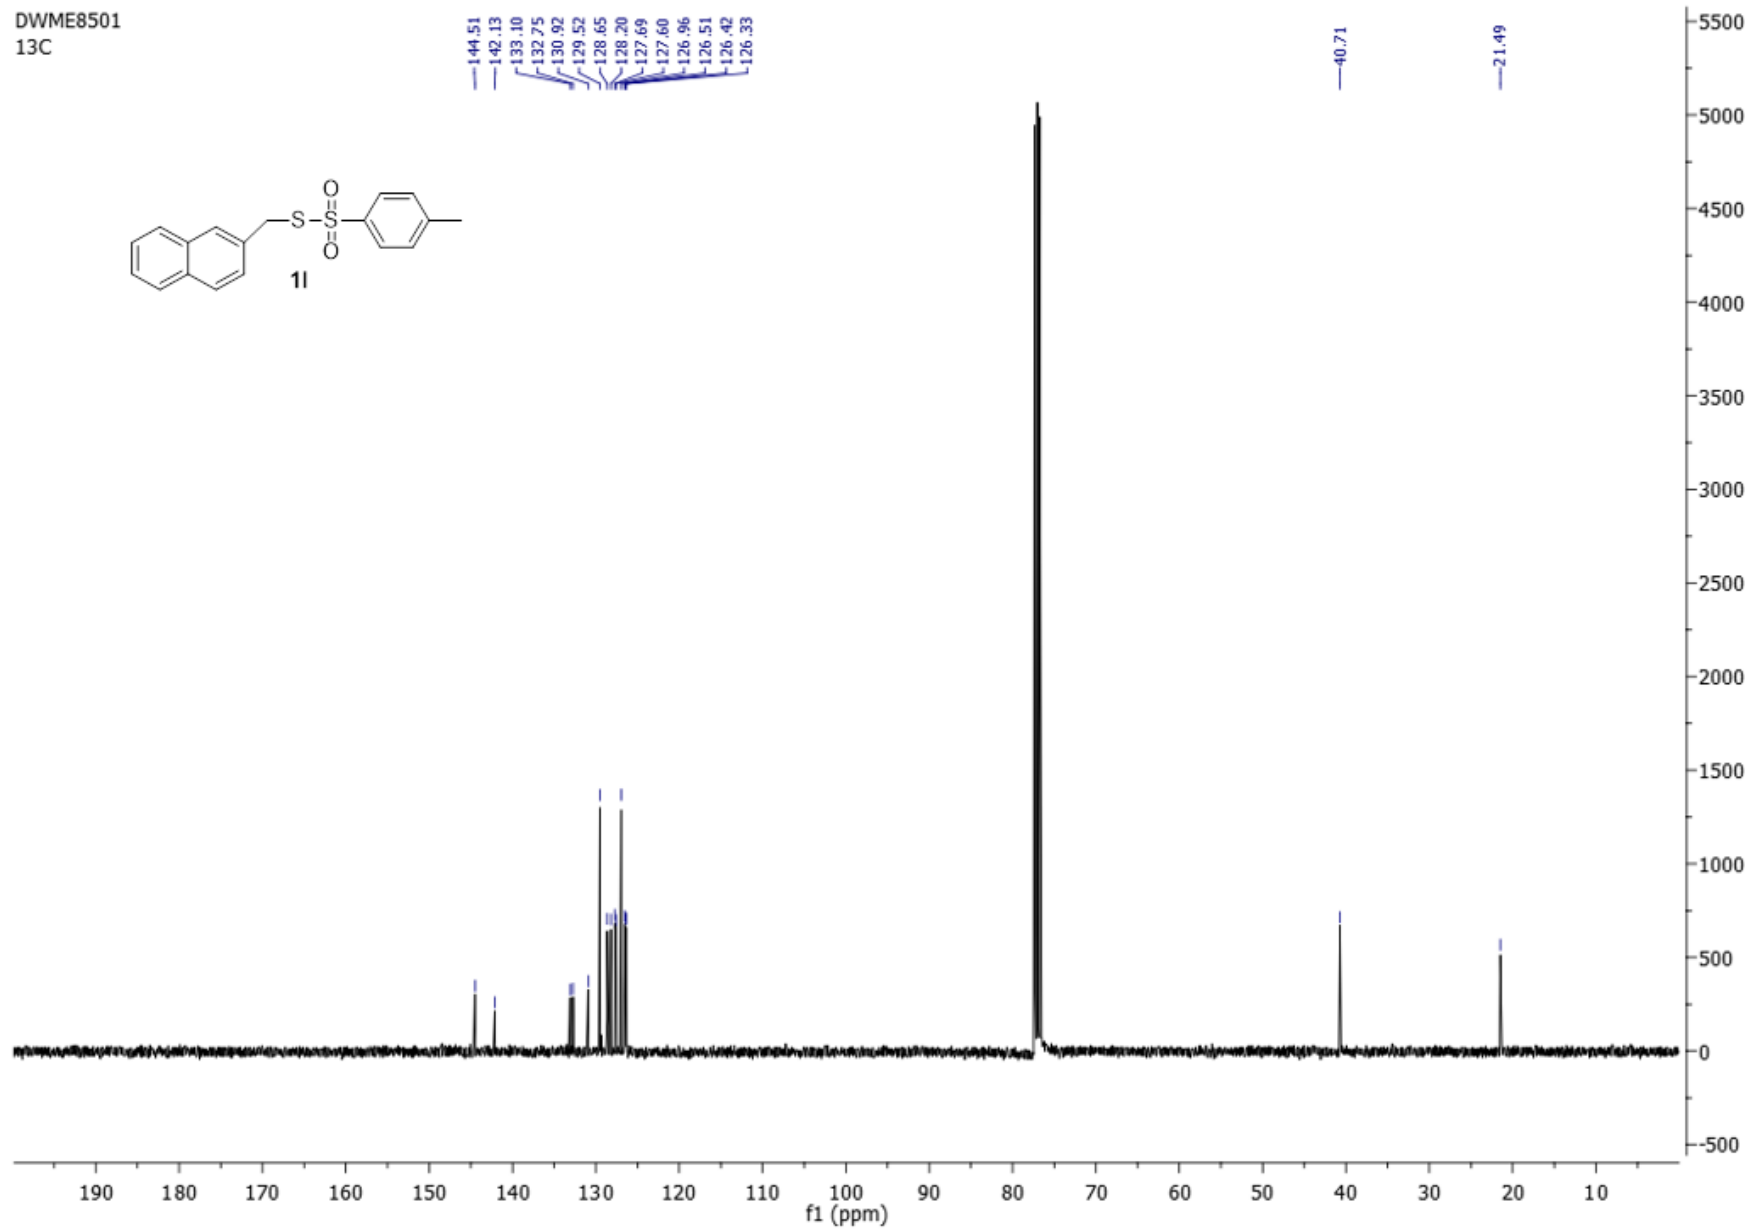

DWME870\_F2  
1H

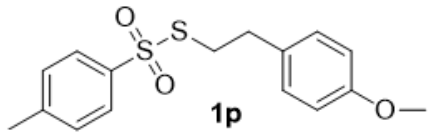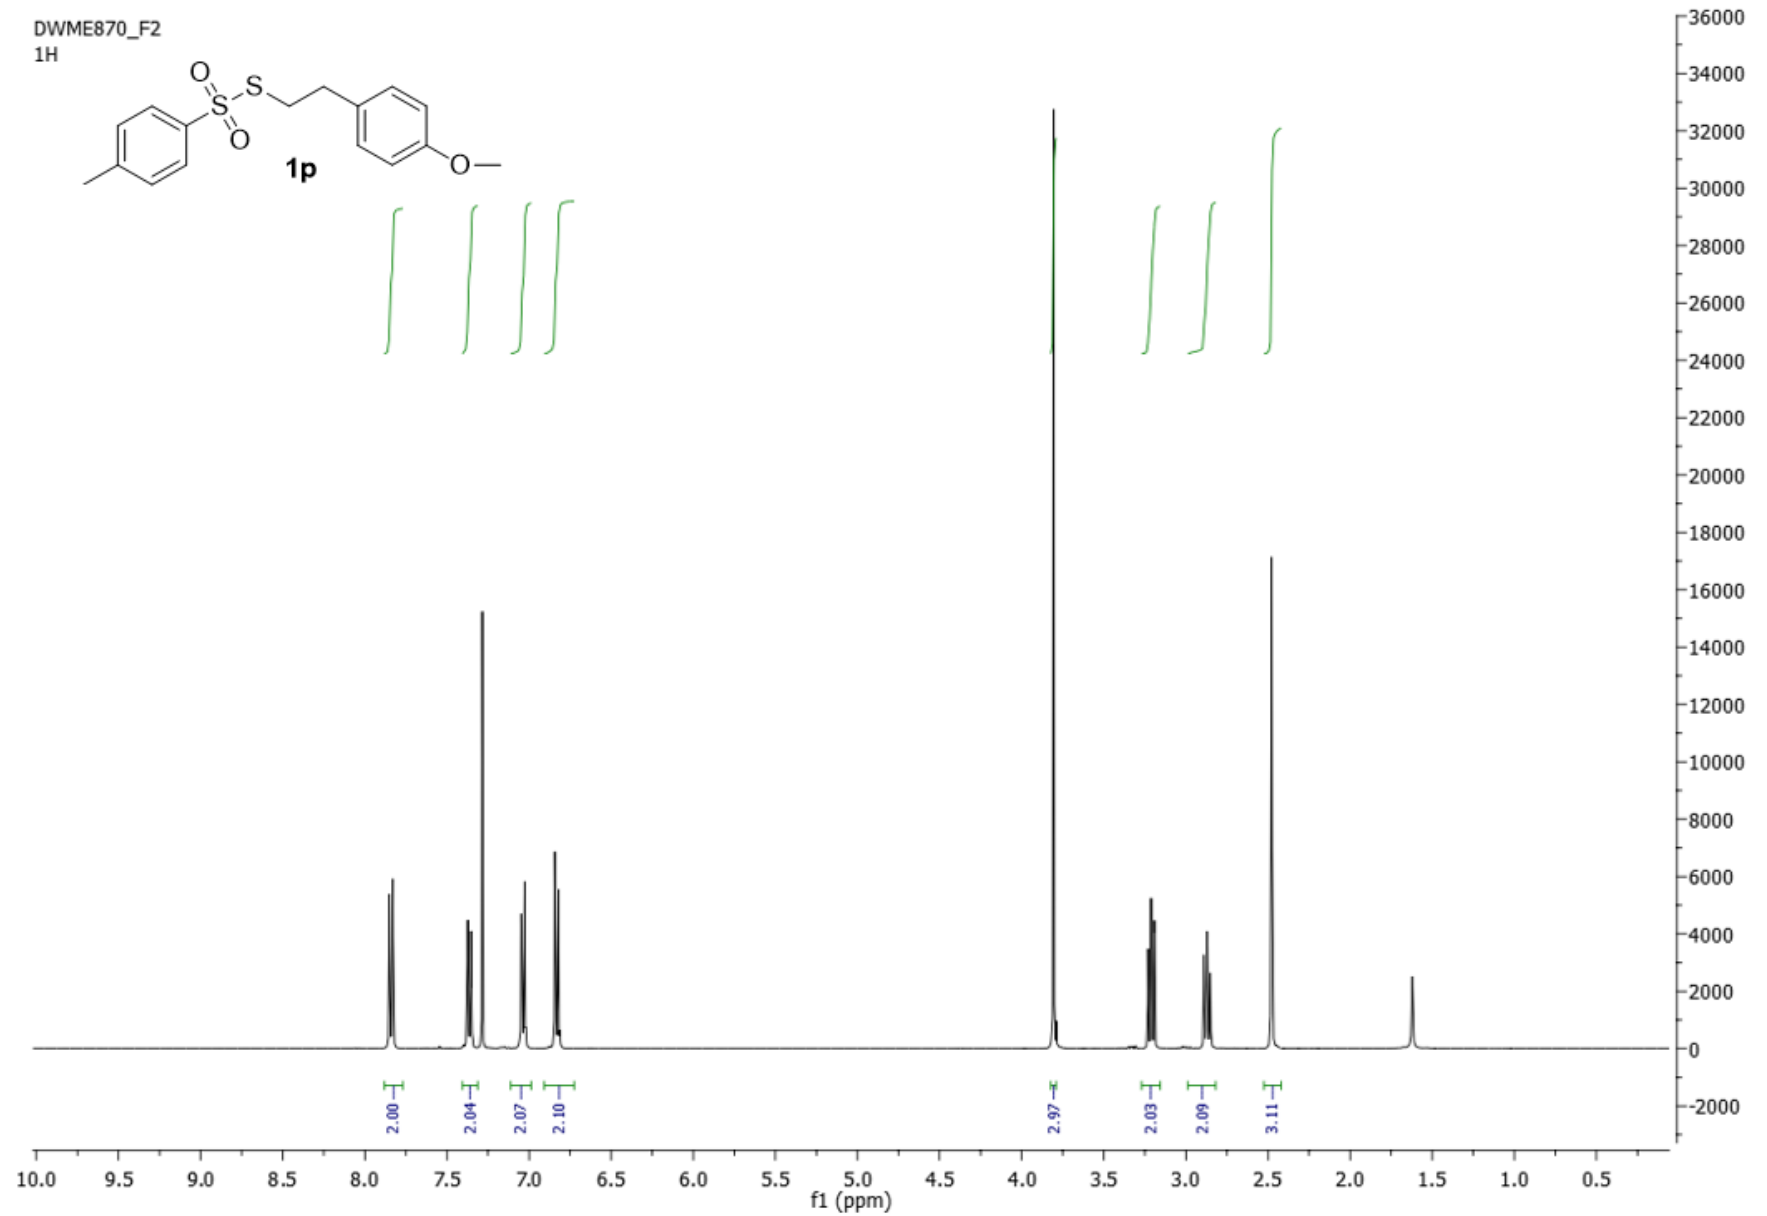

DWME870\_F2  
13C

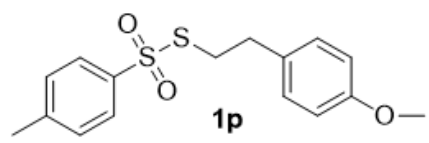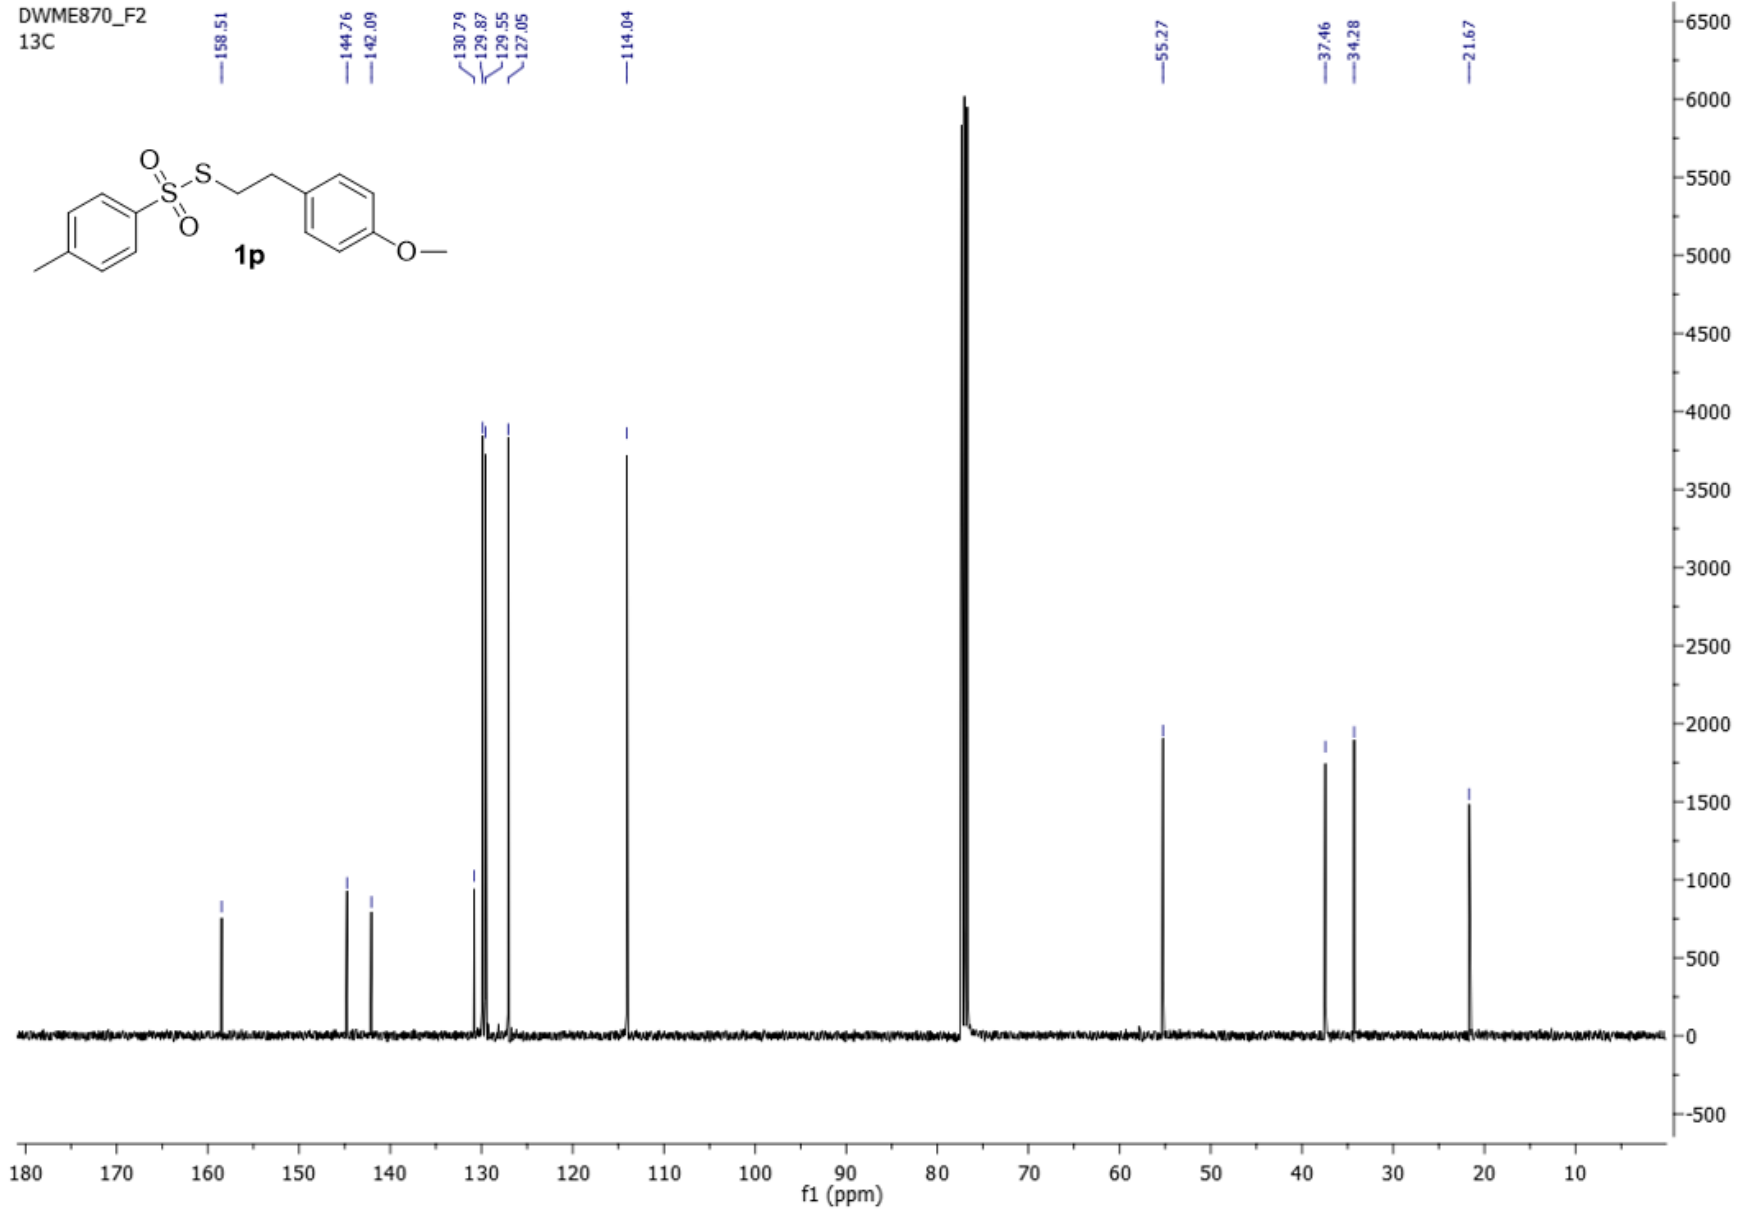

DWME821  
1H

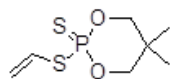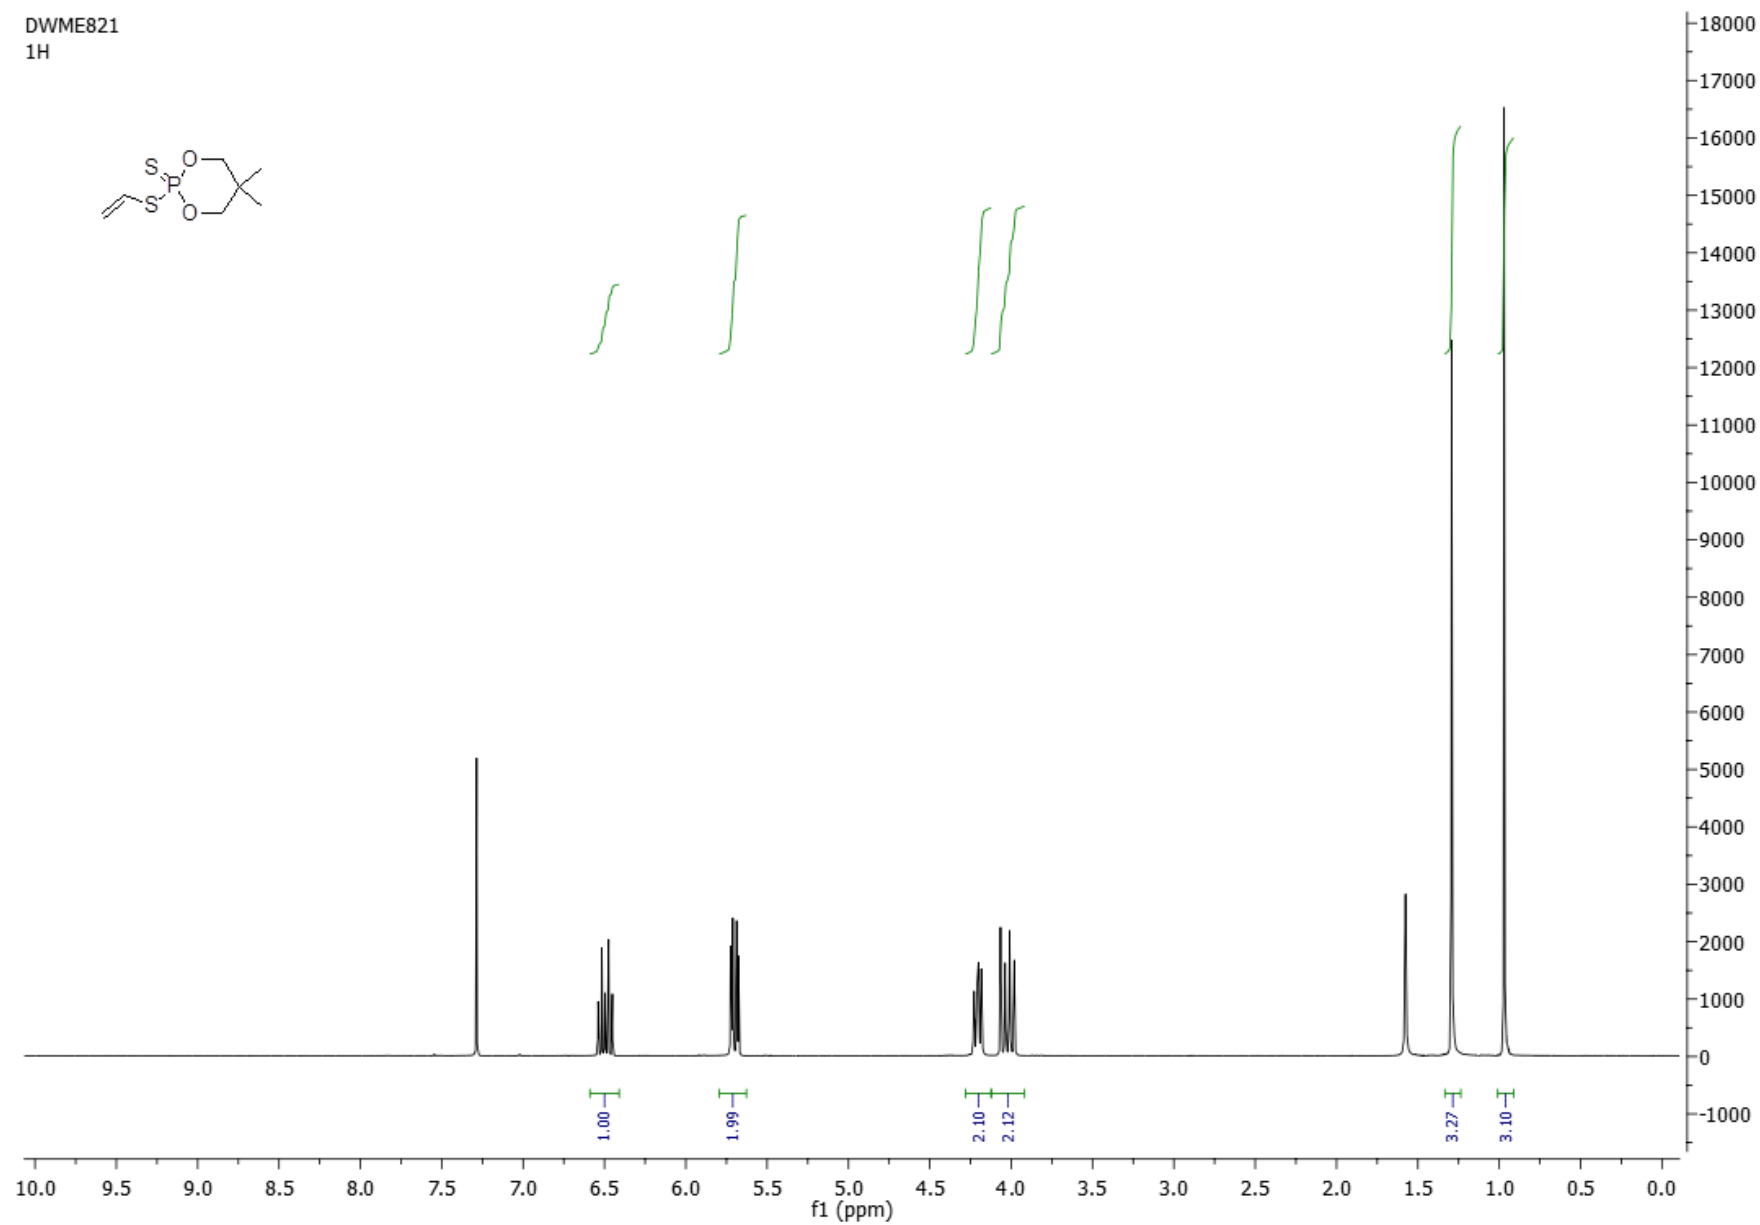

DWME821  
13C

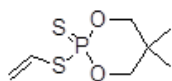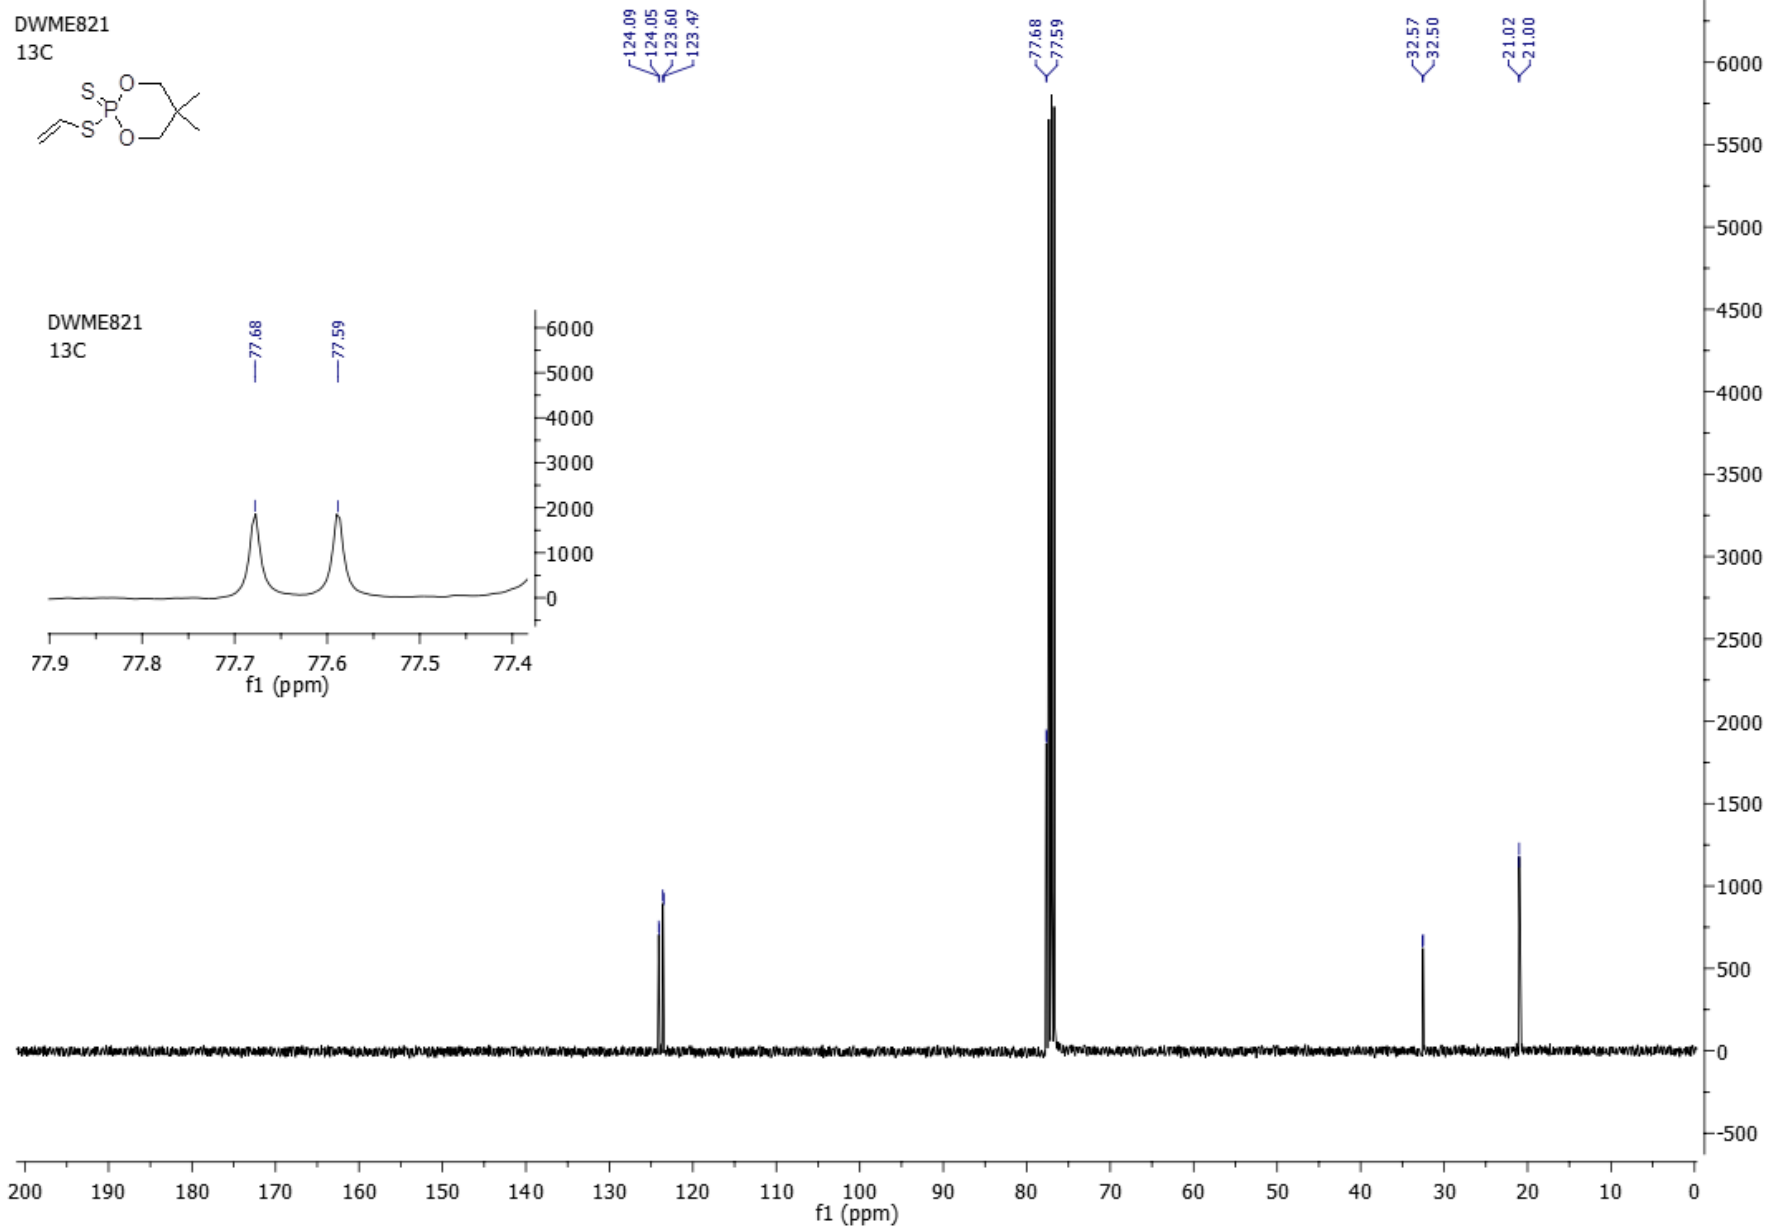

DWME821  
31P{1H}

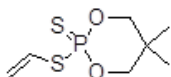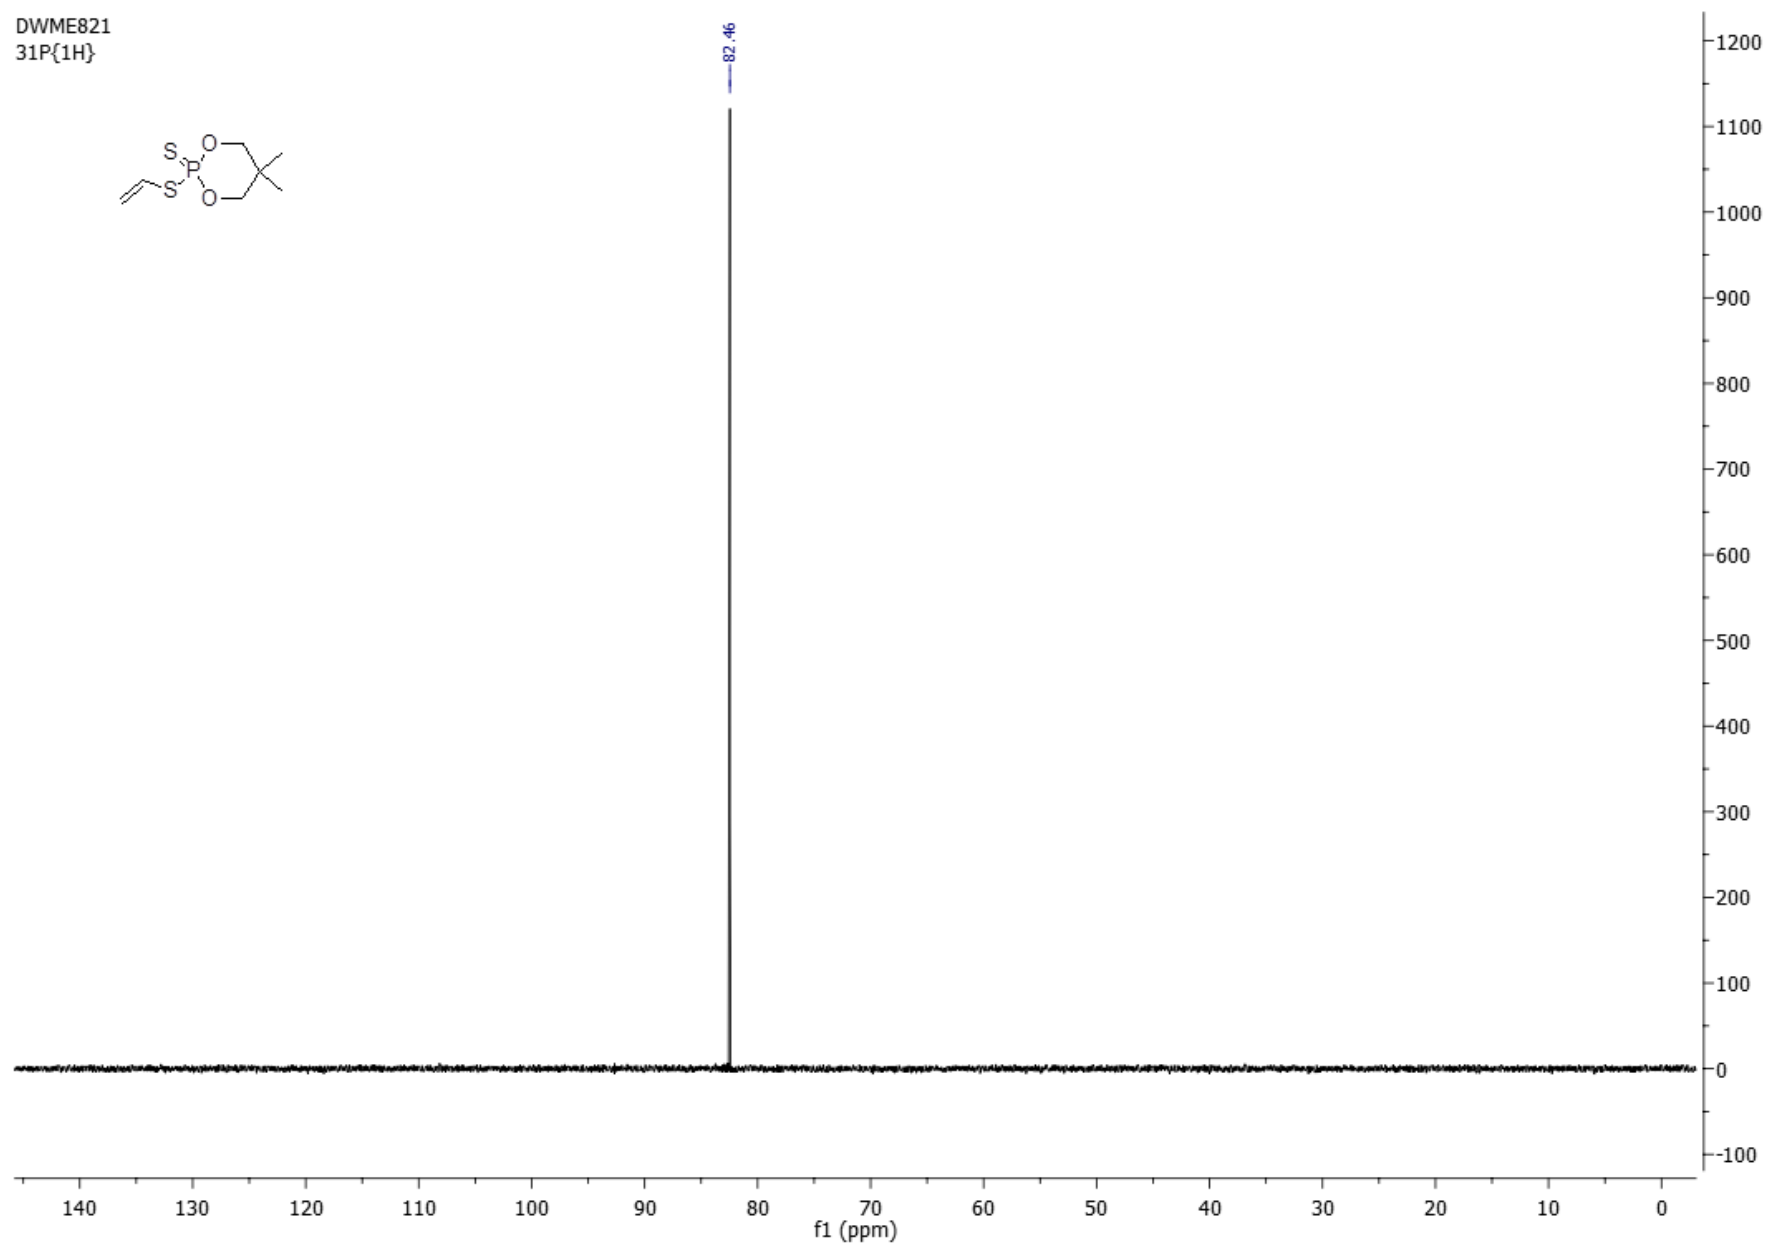

S31

DWBJ180  
1H

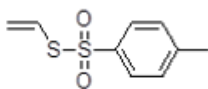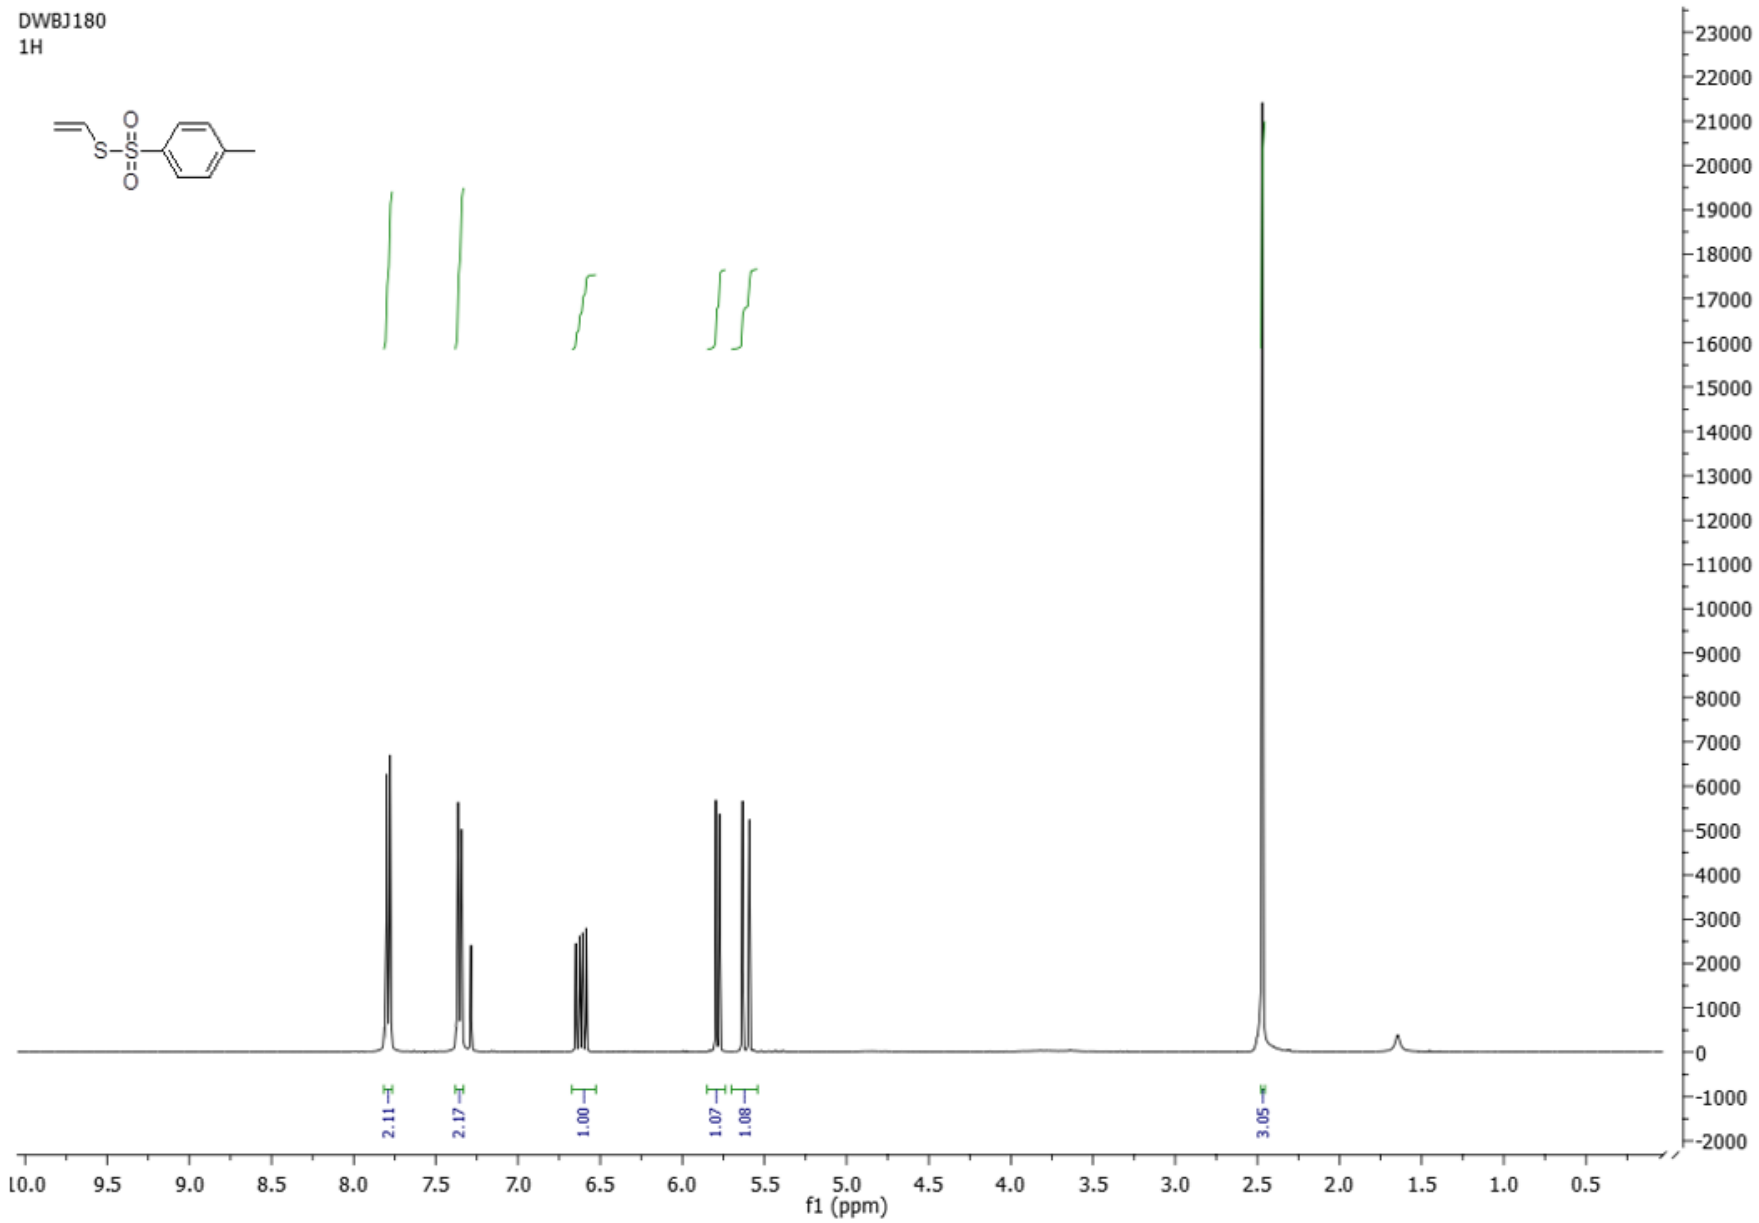



DWBJ180  
13C

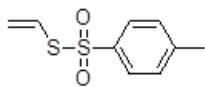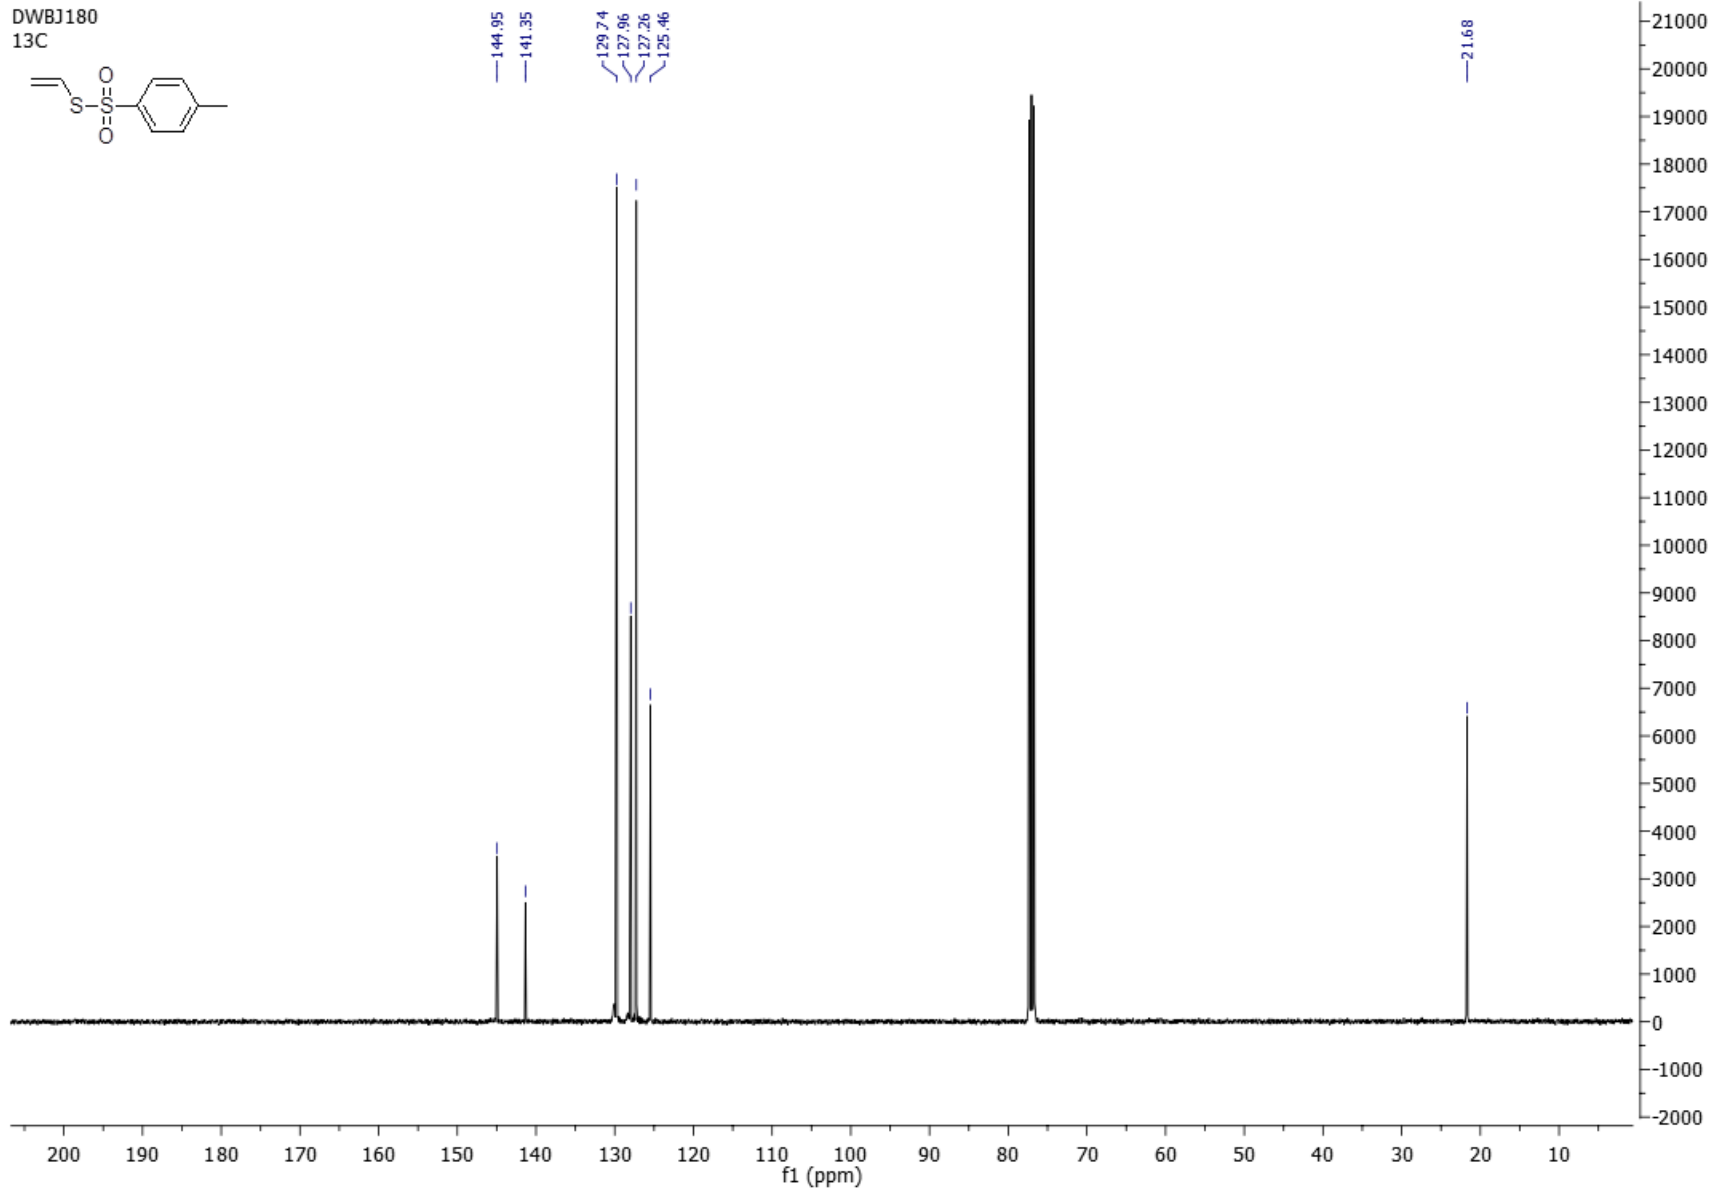

DWBJR56  
1H

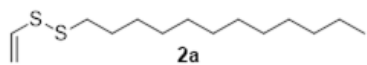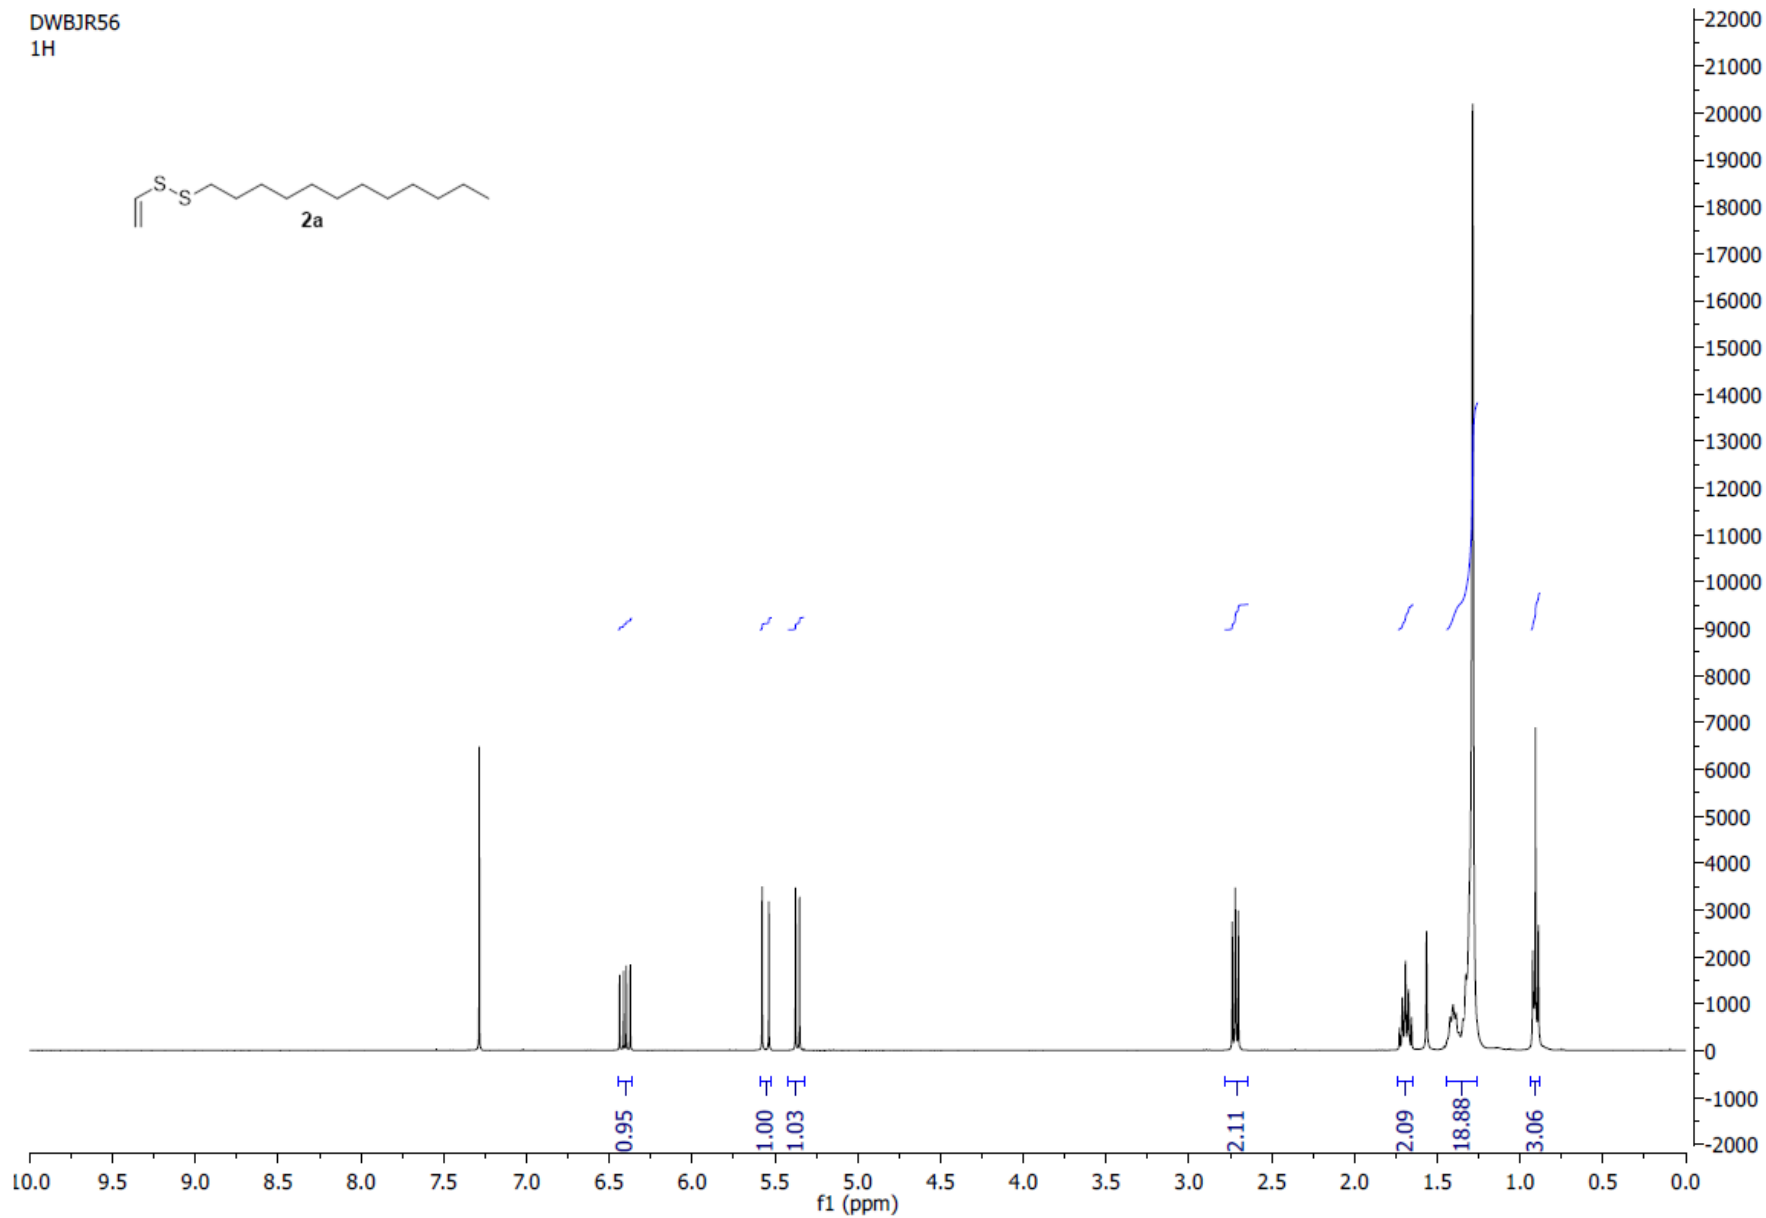

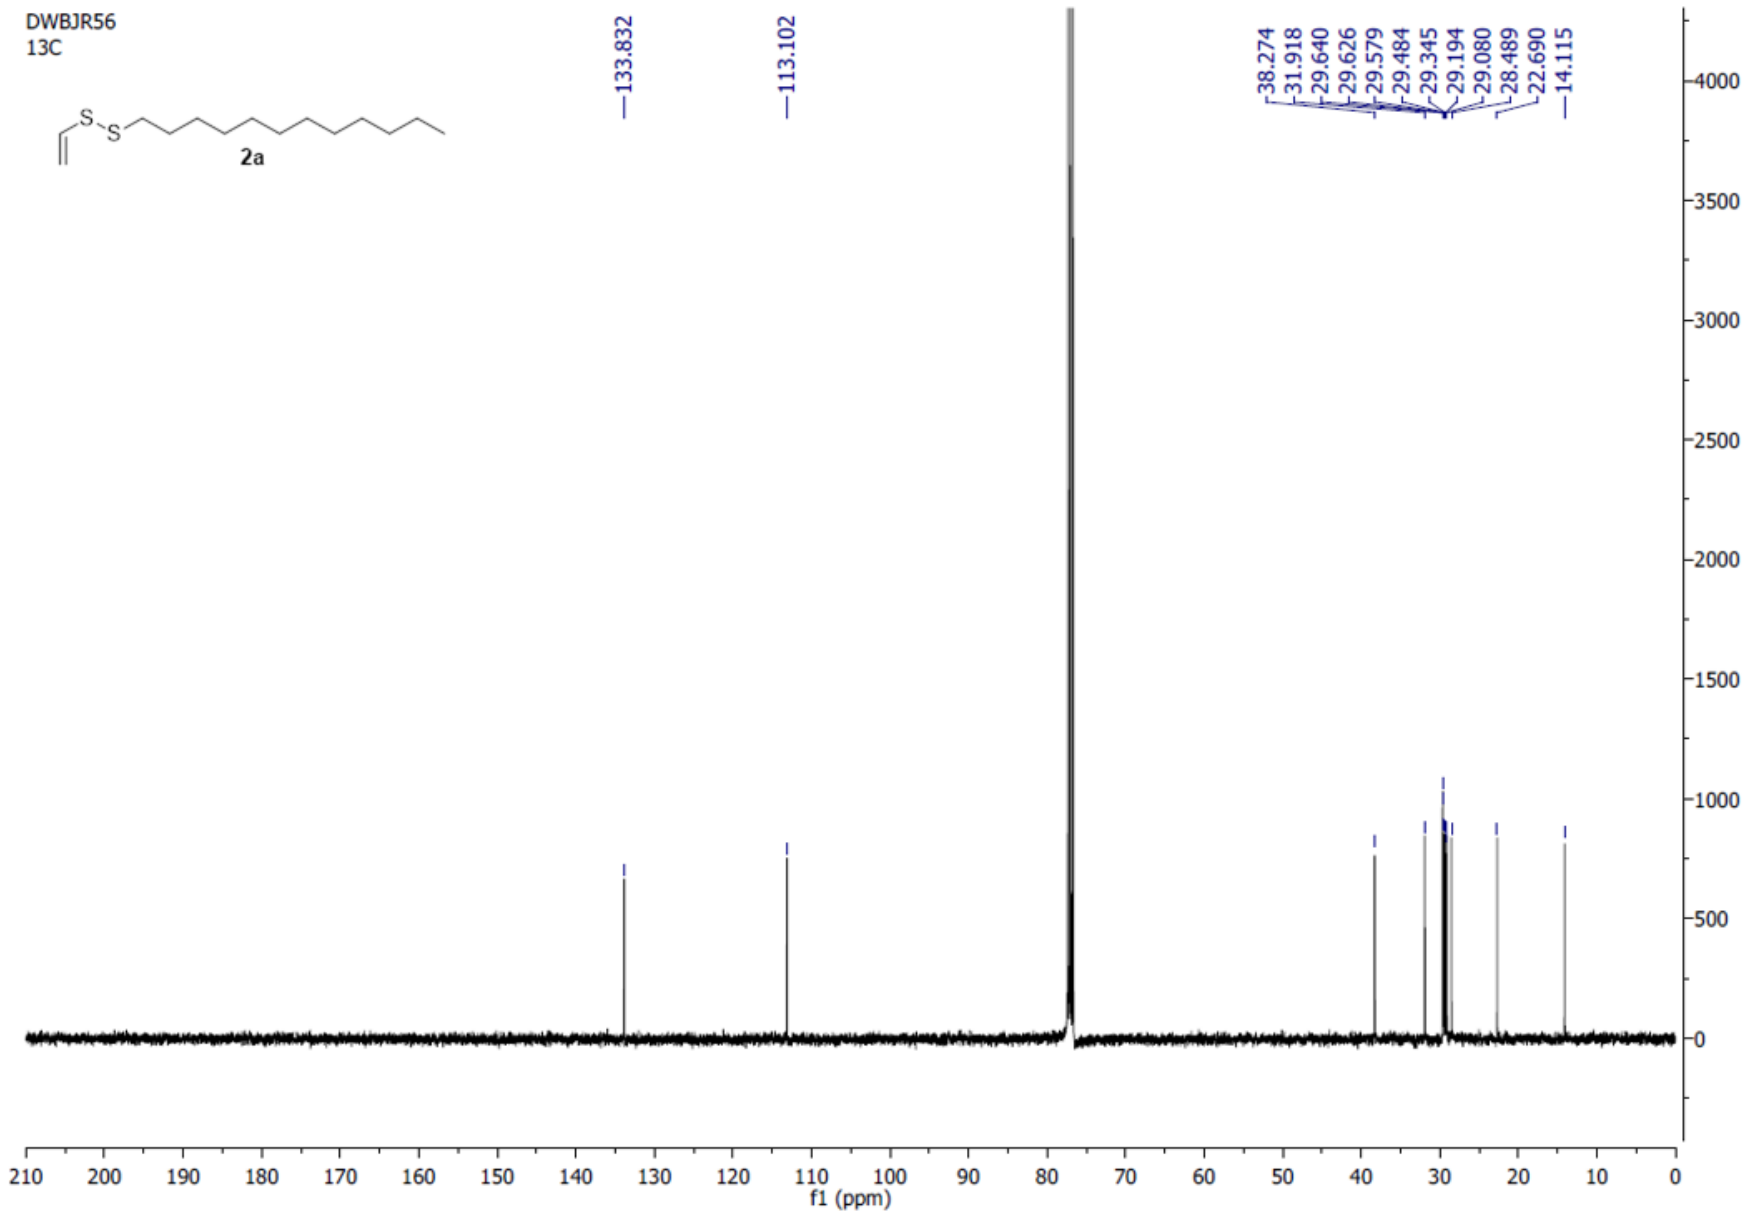

DWME848  
1H

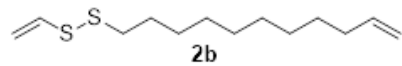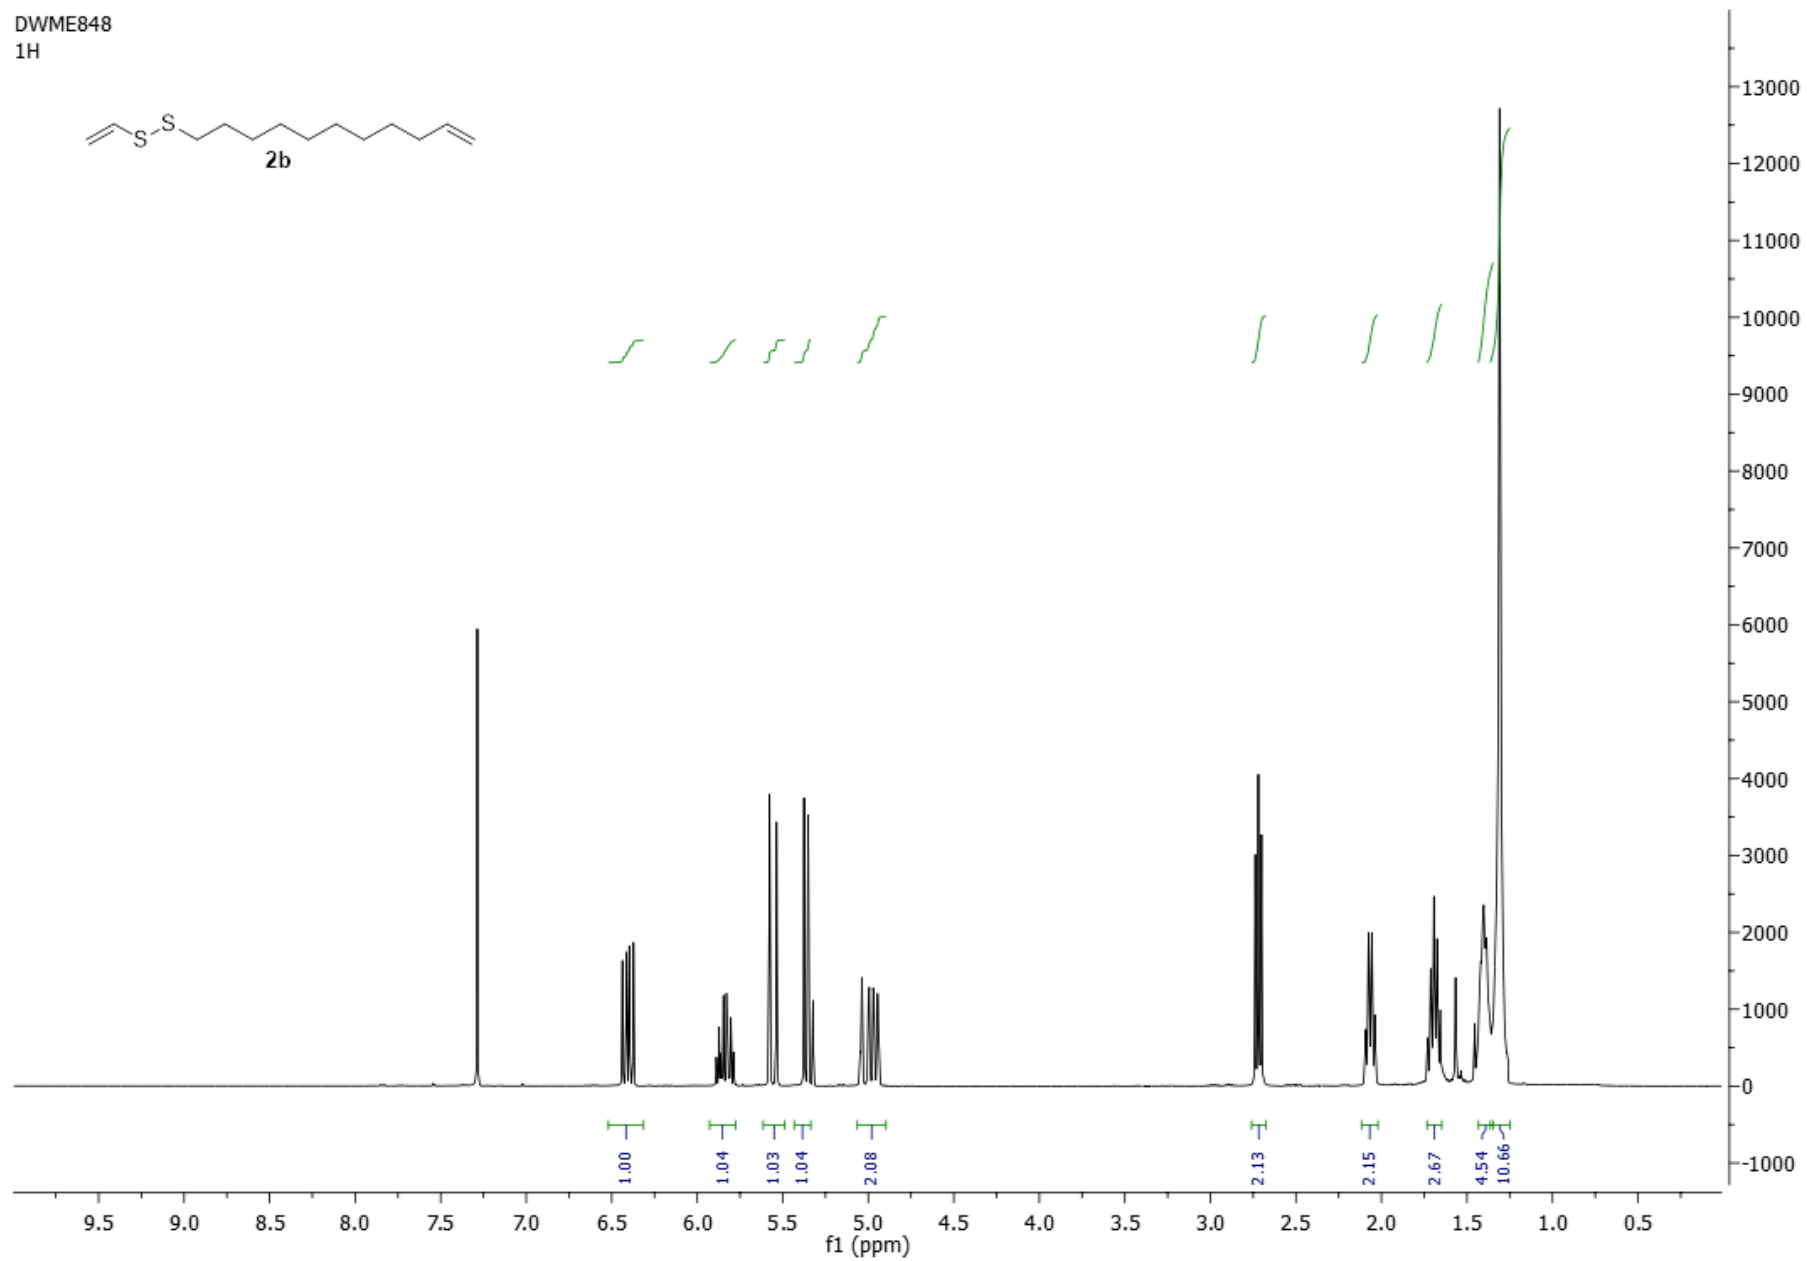

S36

DWME848  
13C

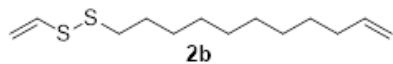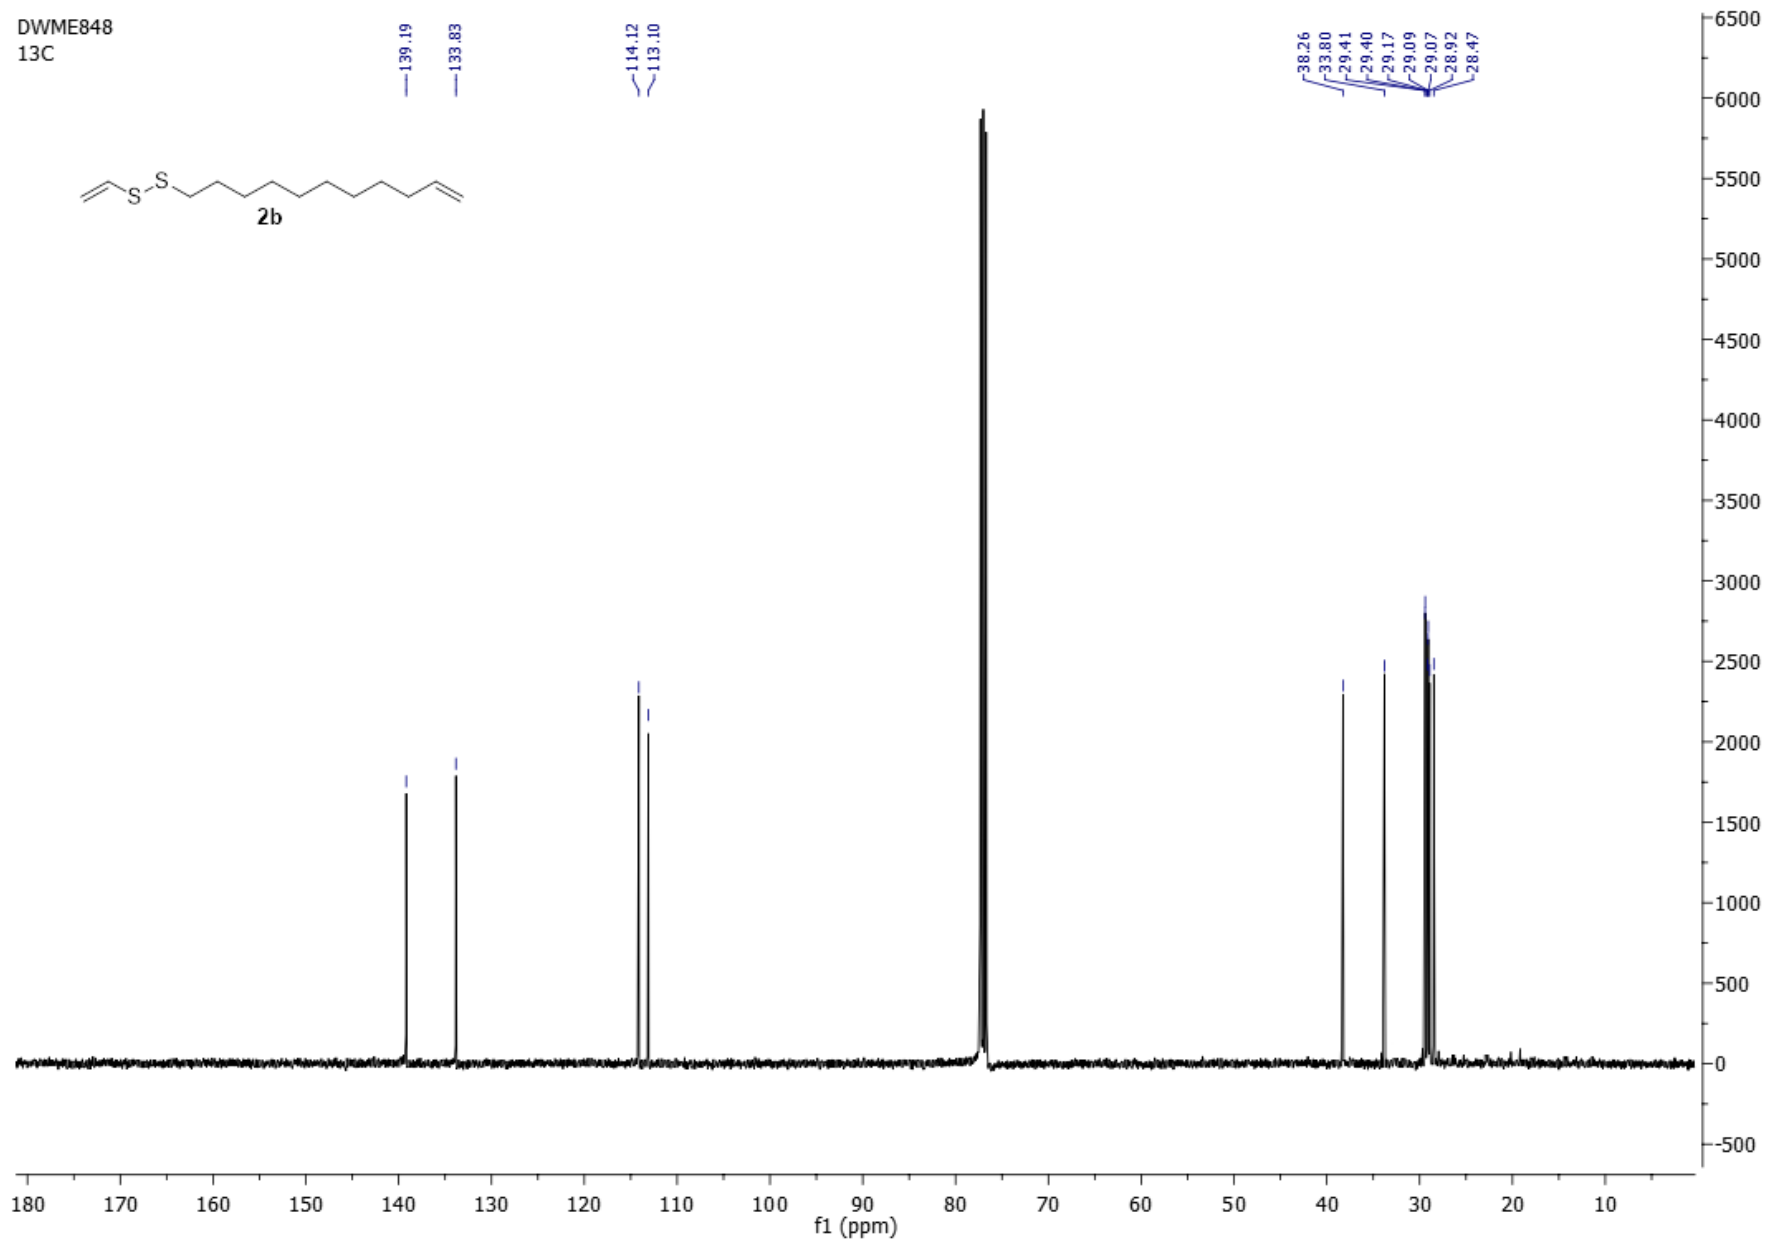

S37

DWO907E2  
1H

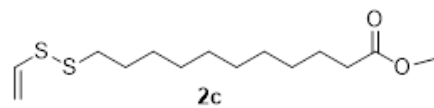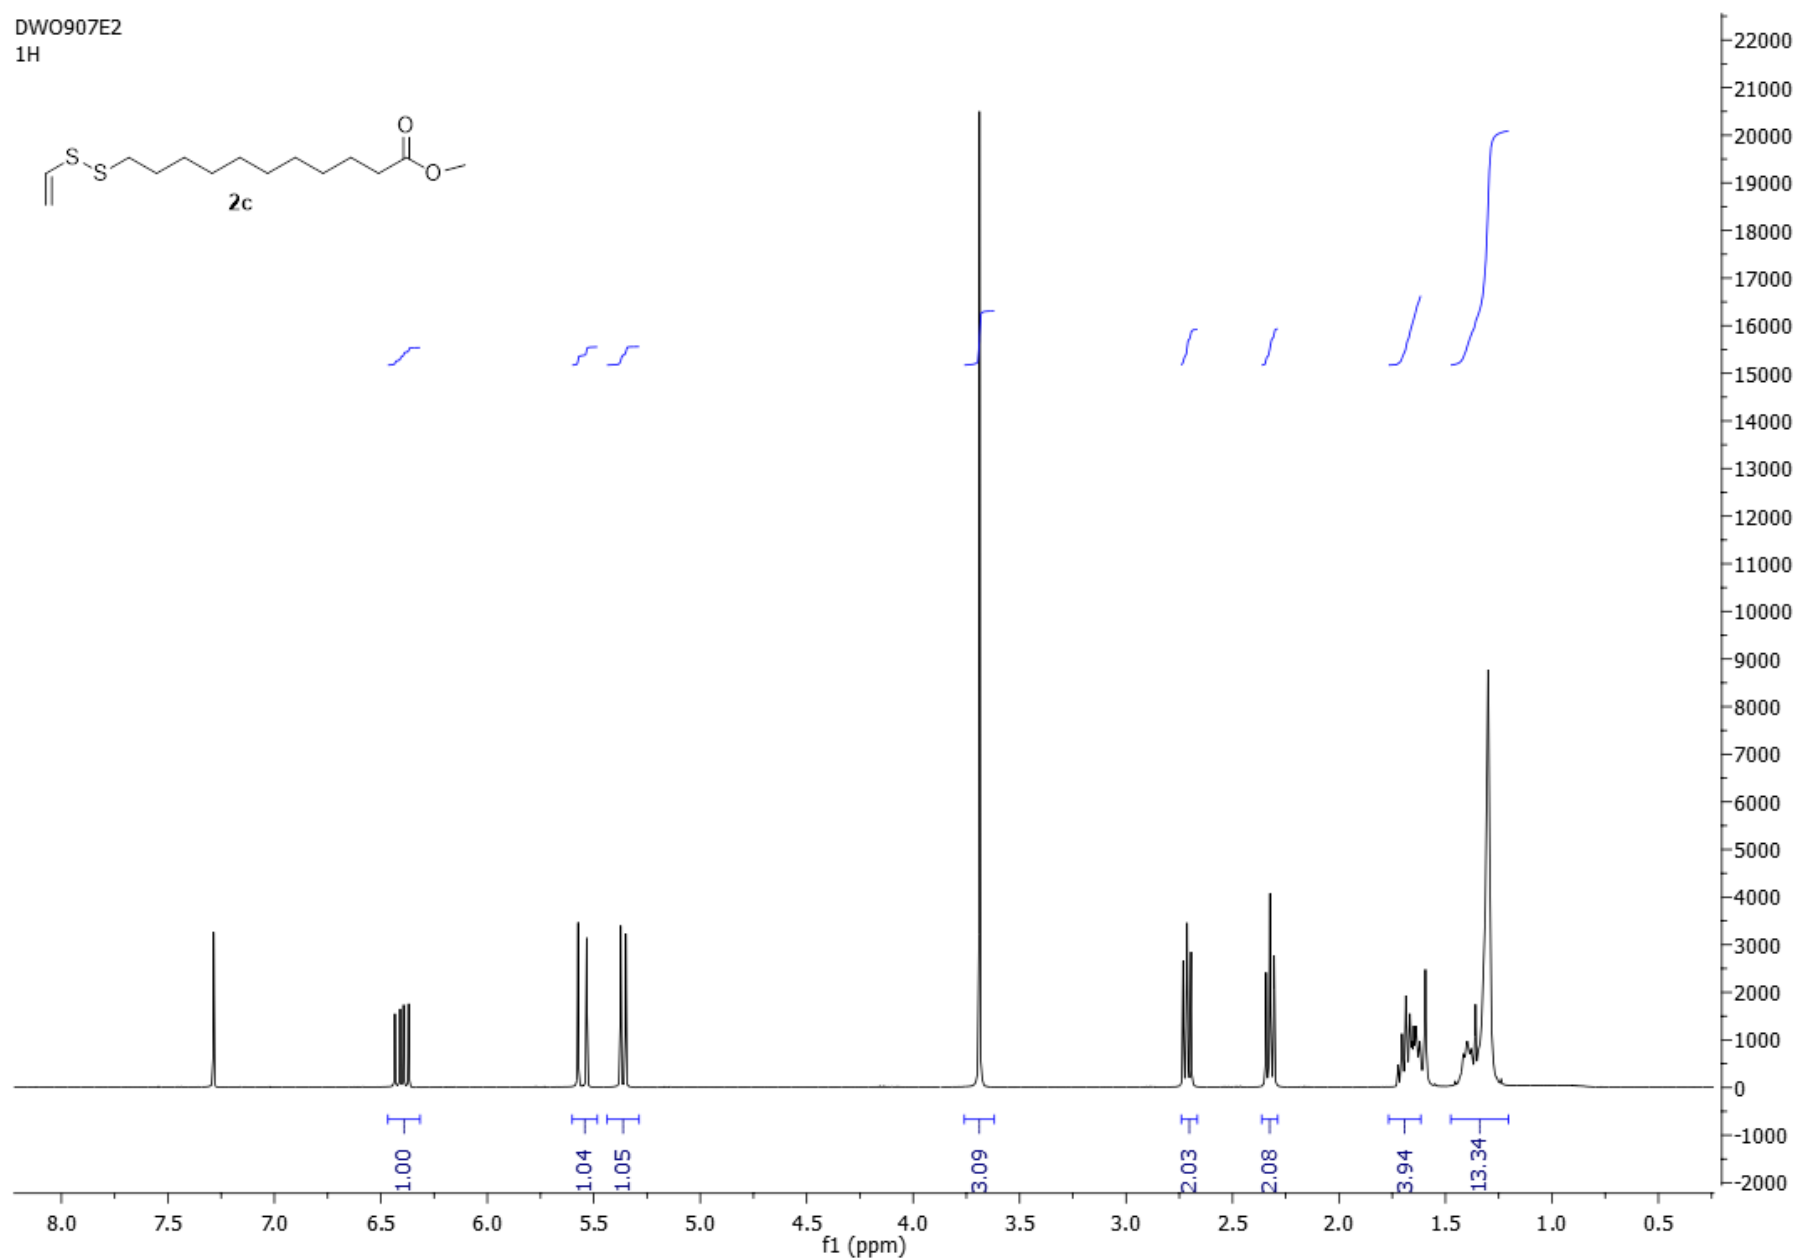

S38

DW0907E2  
13C{1H}

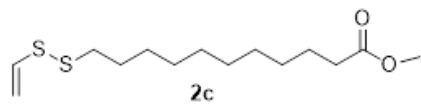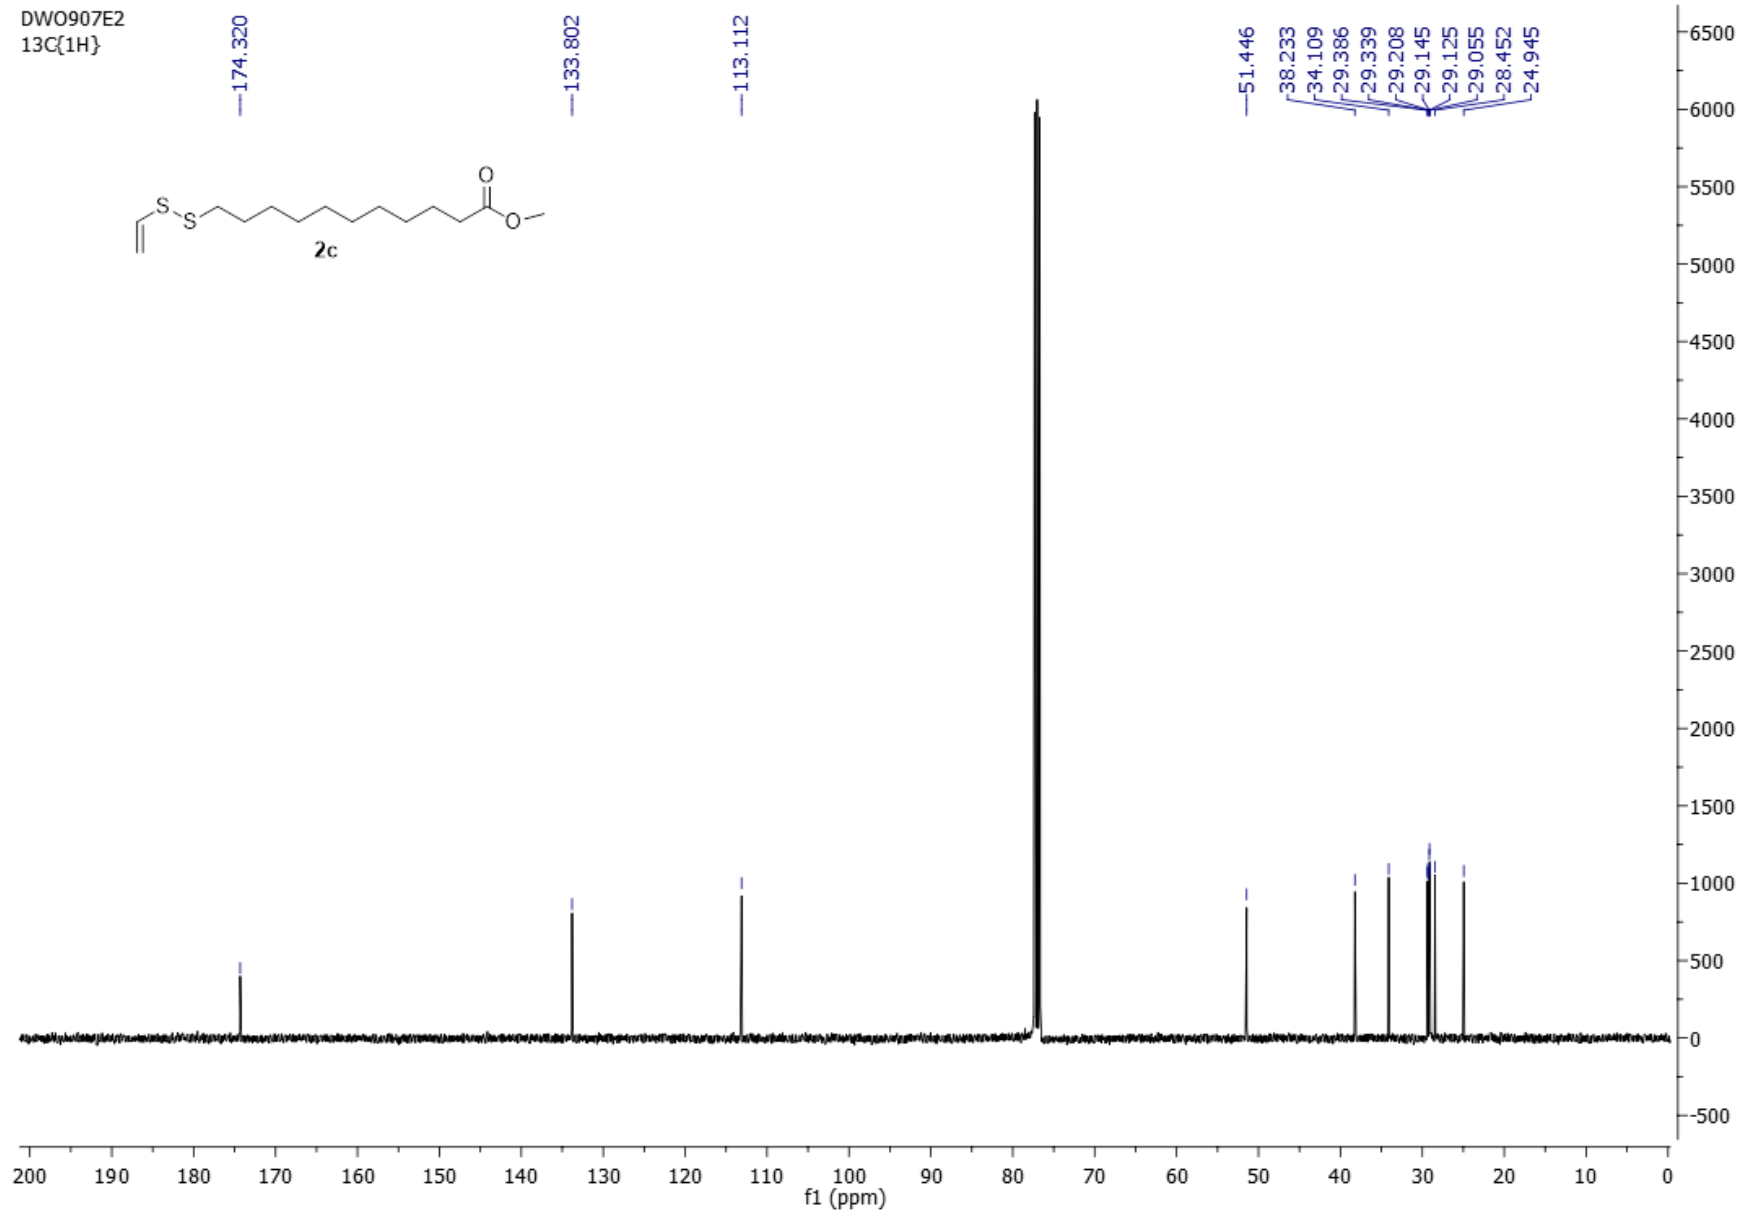

DWBJE65\_F1  
1H

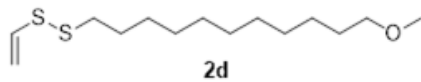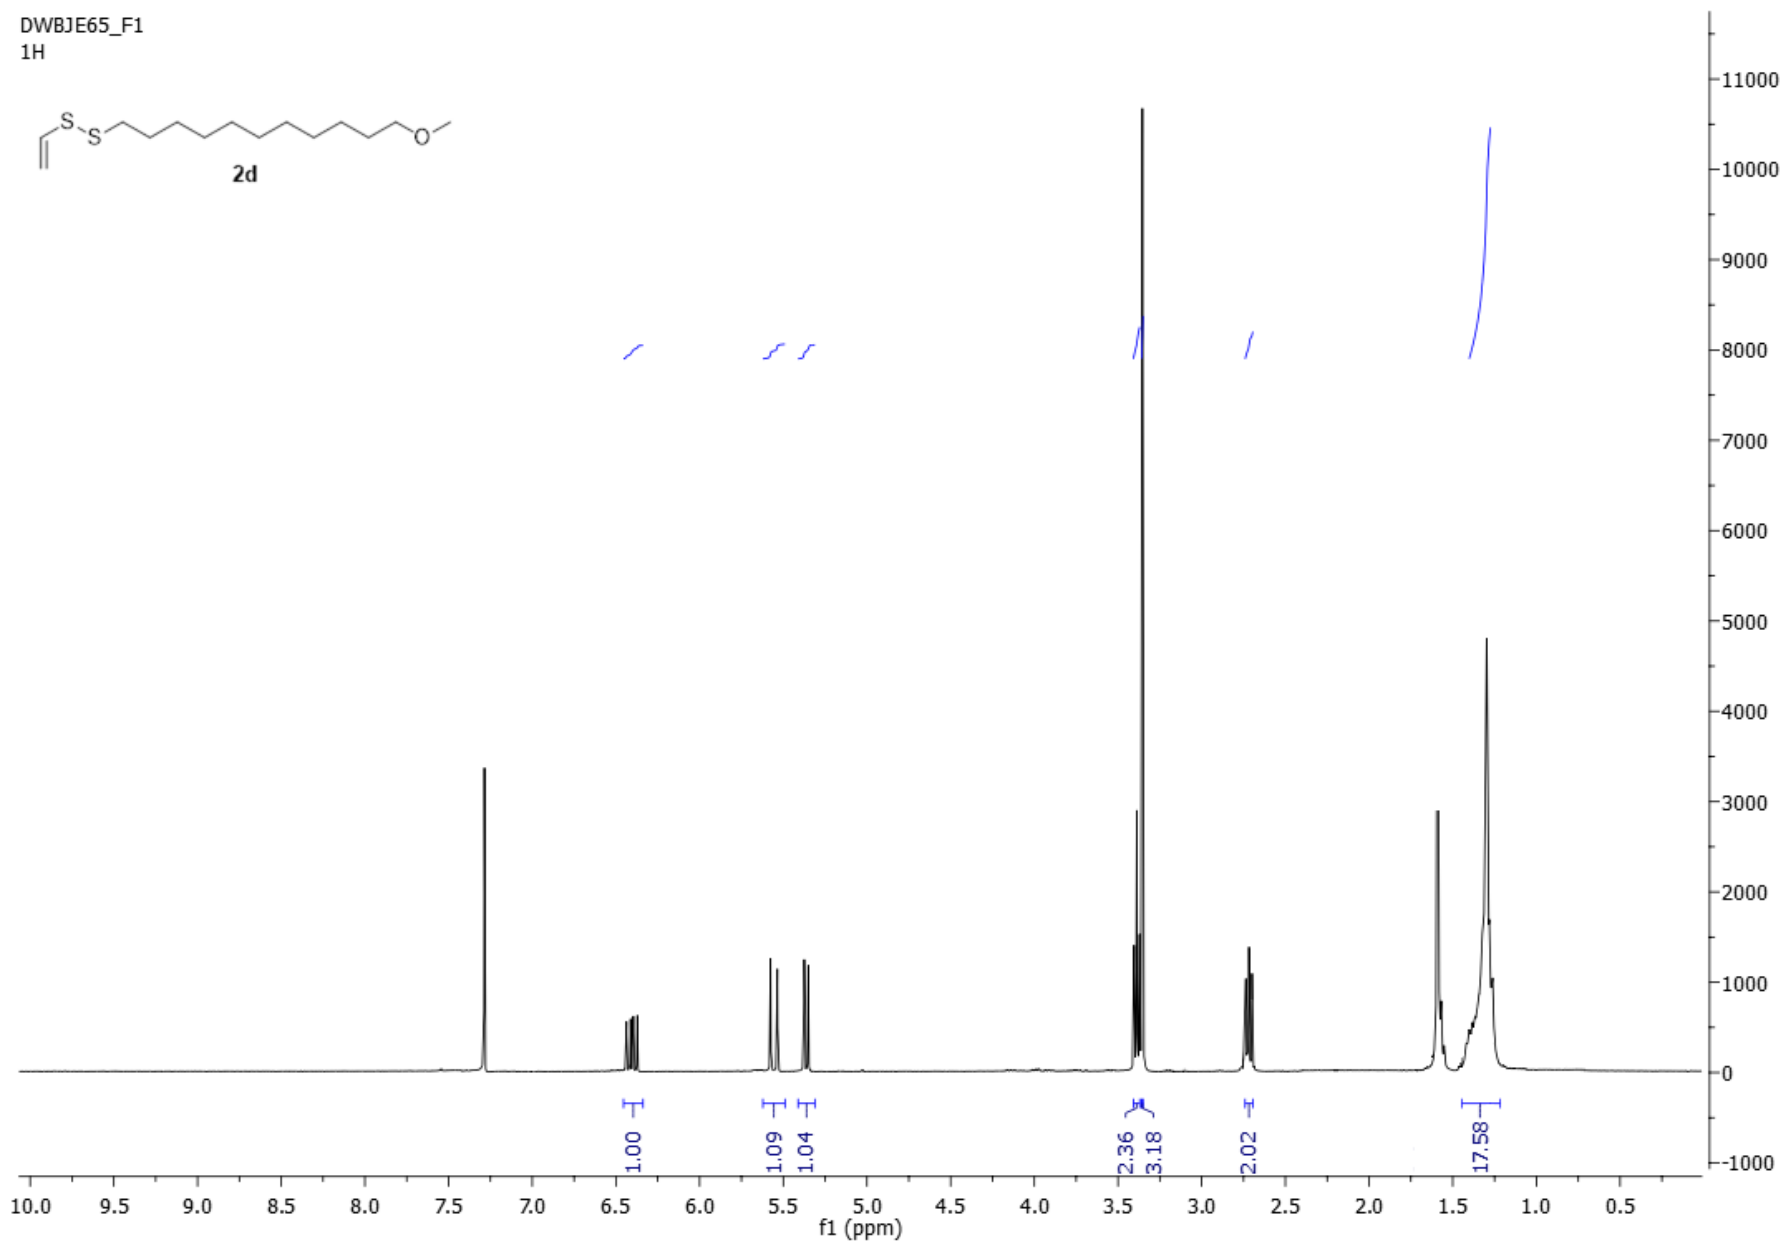



DWBJE65\_F1  
13C

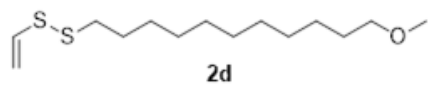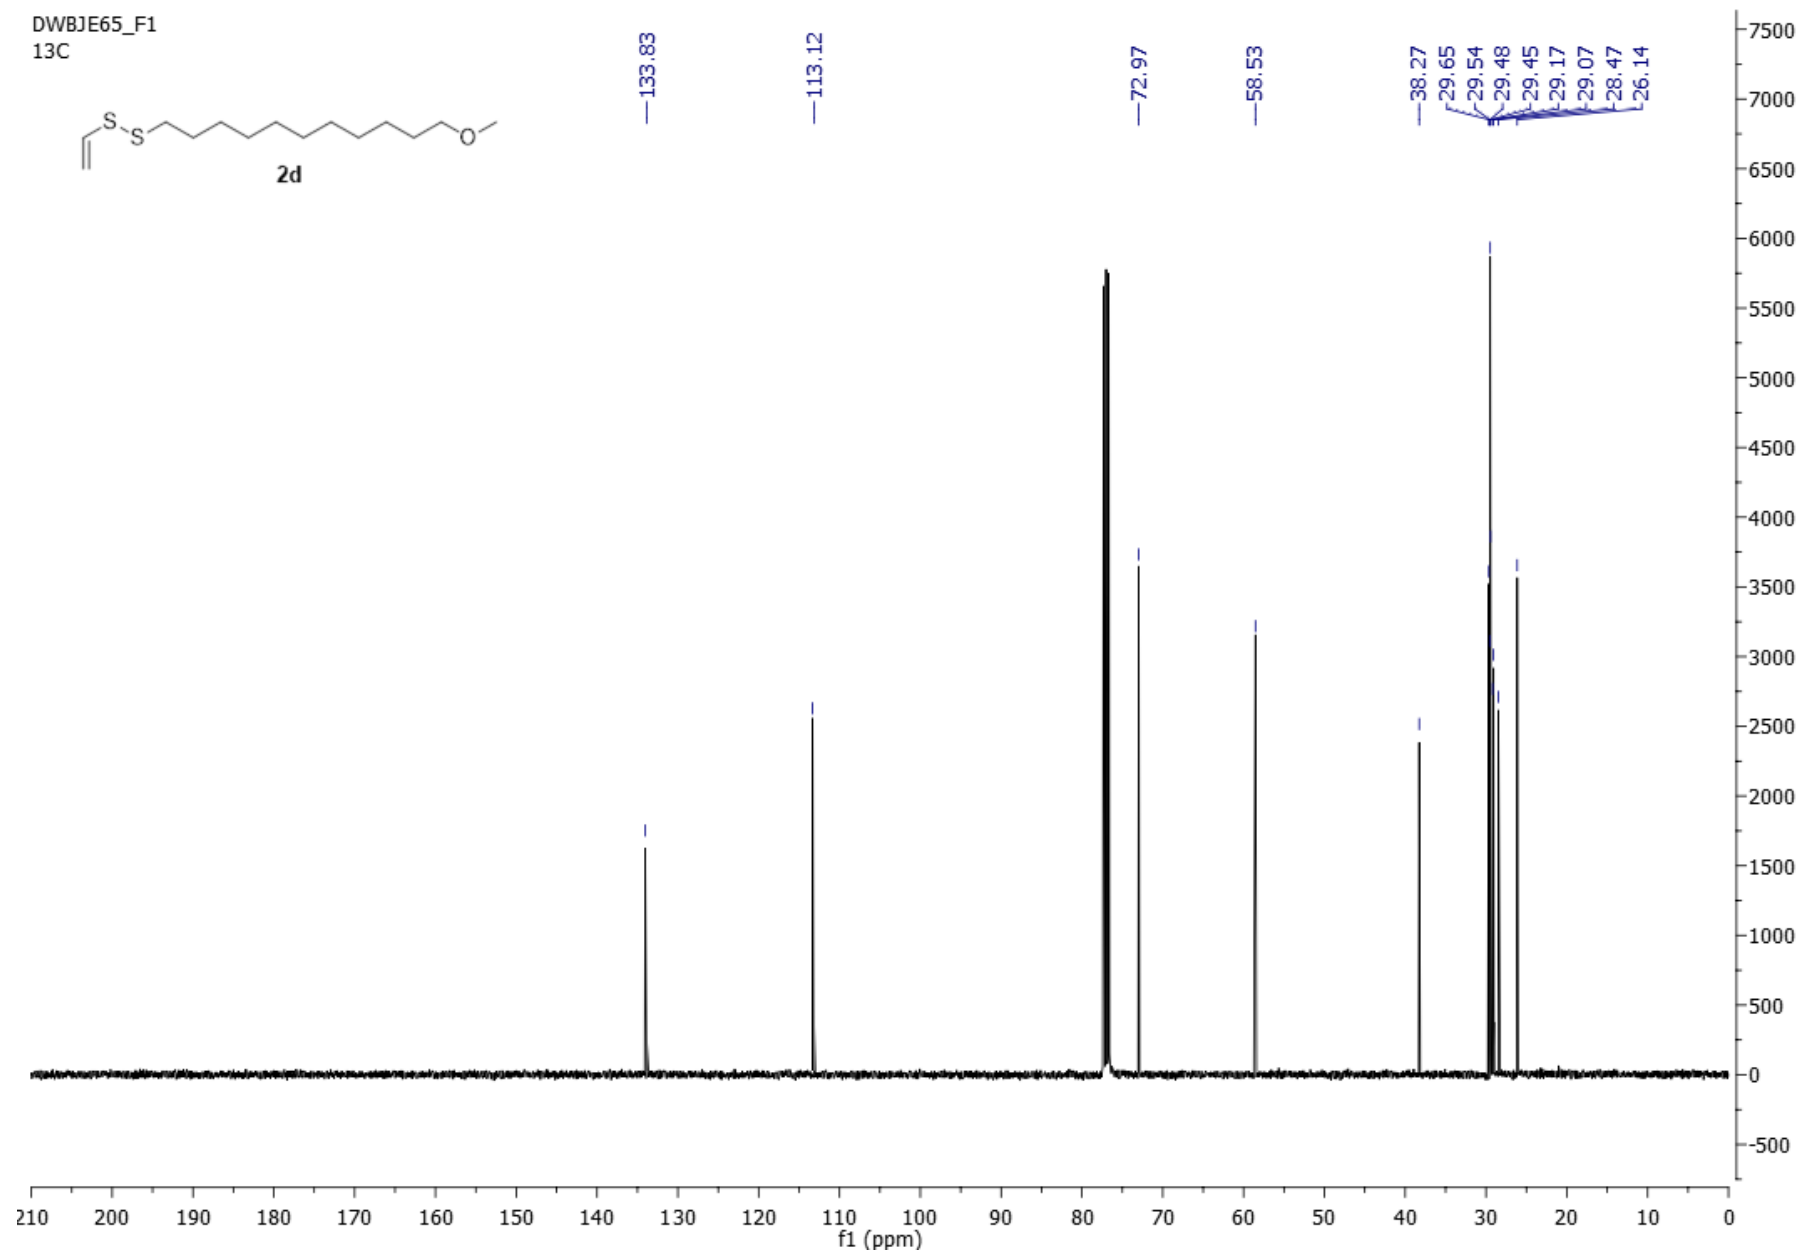

DWB3R68PLUG  
1H

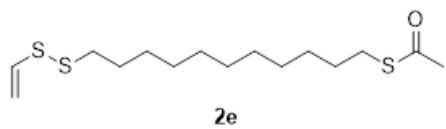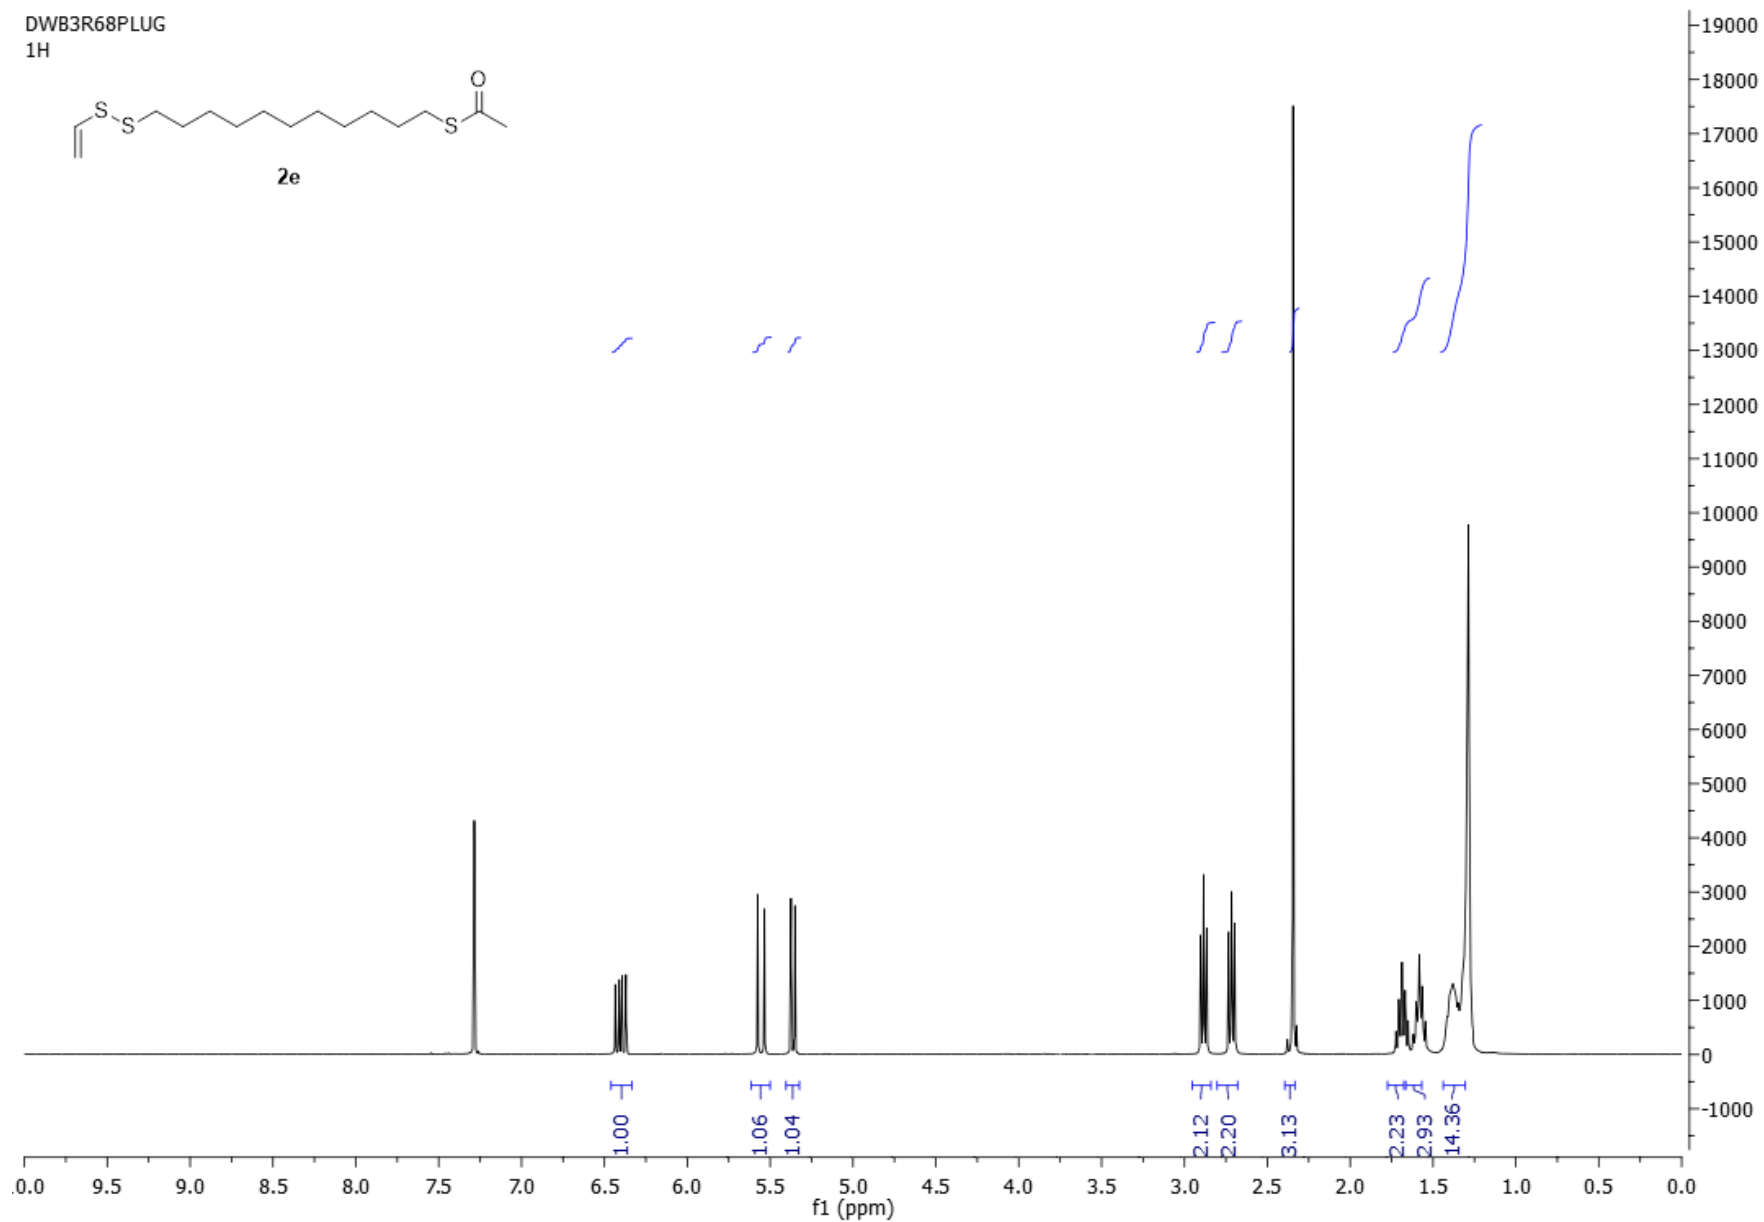

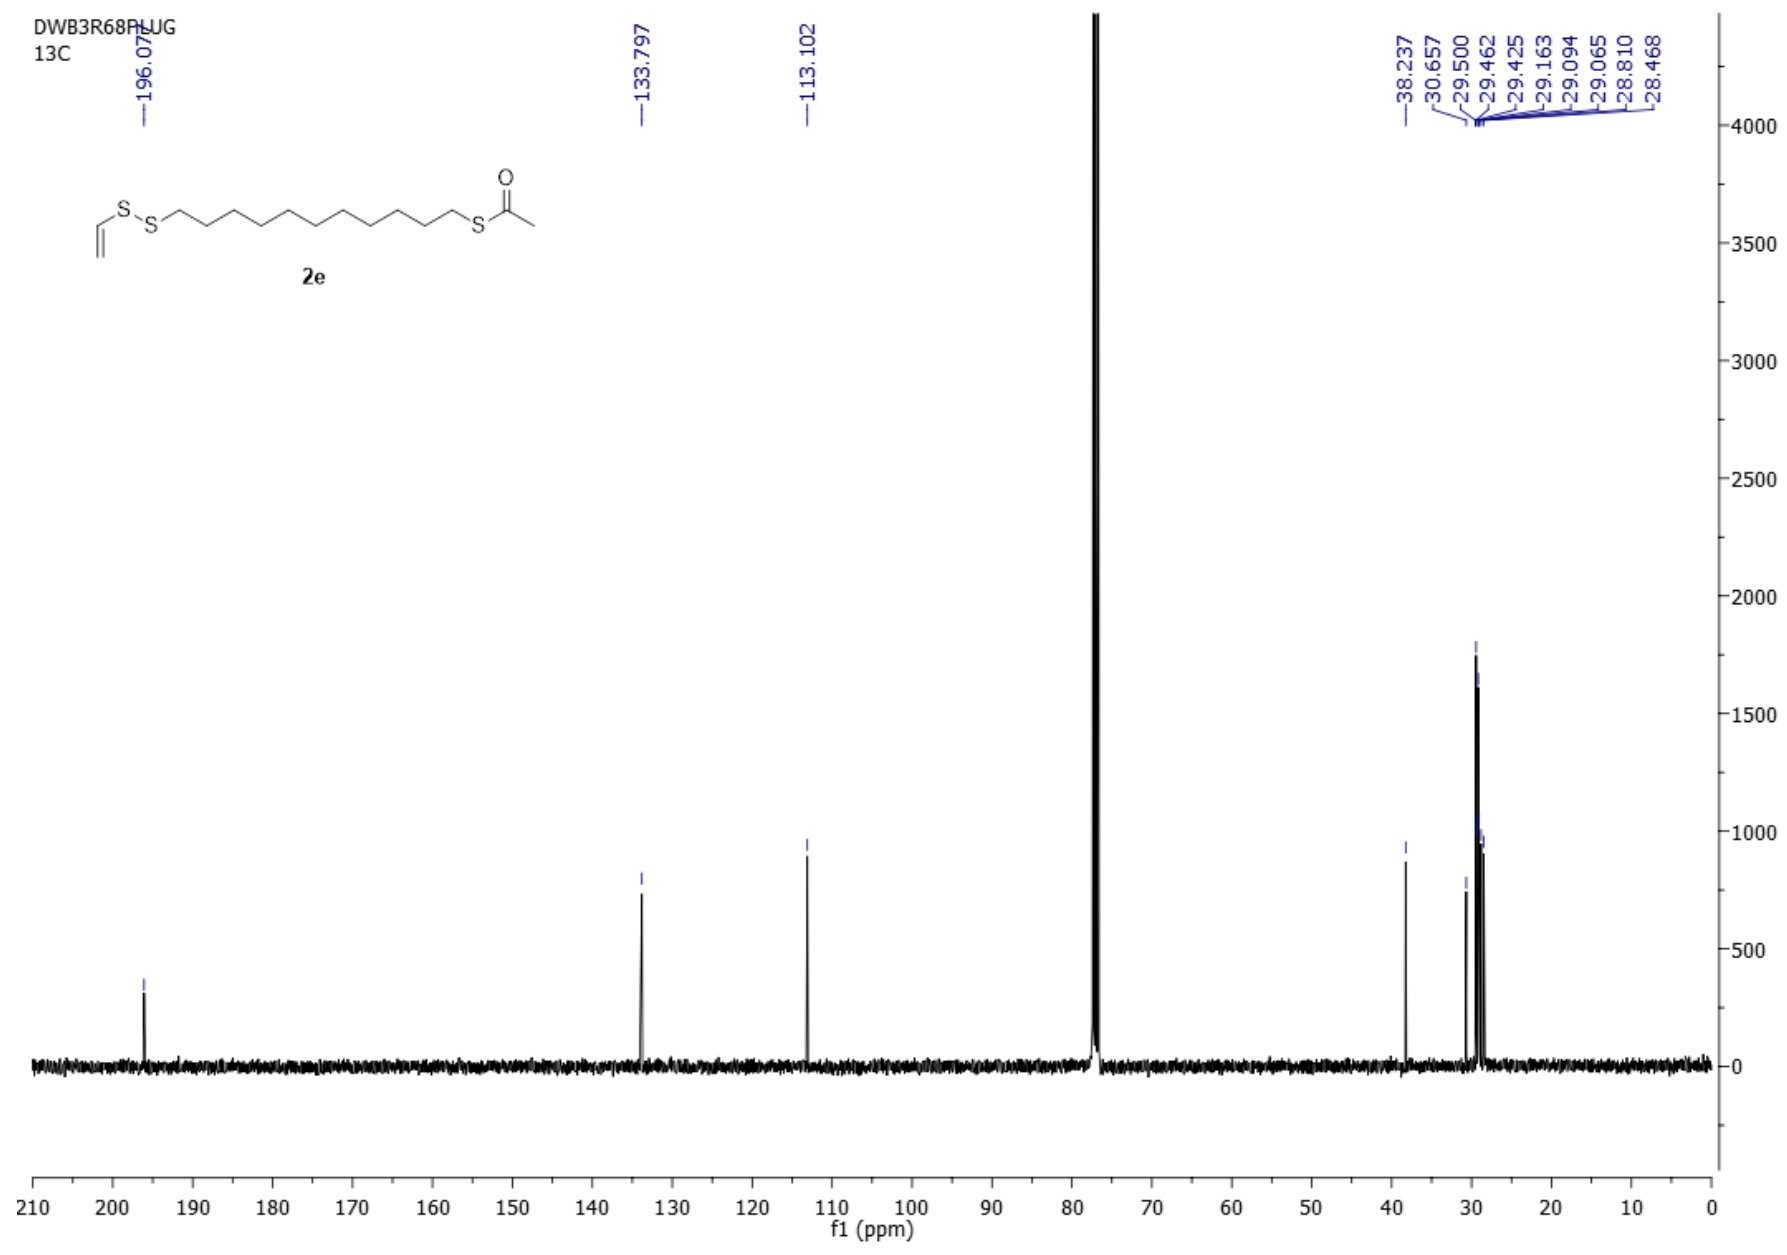

DWME866  
1H

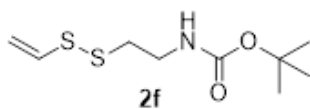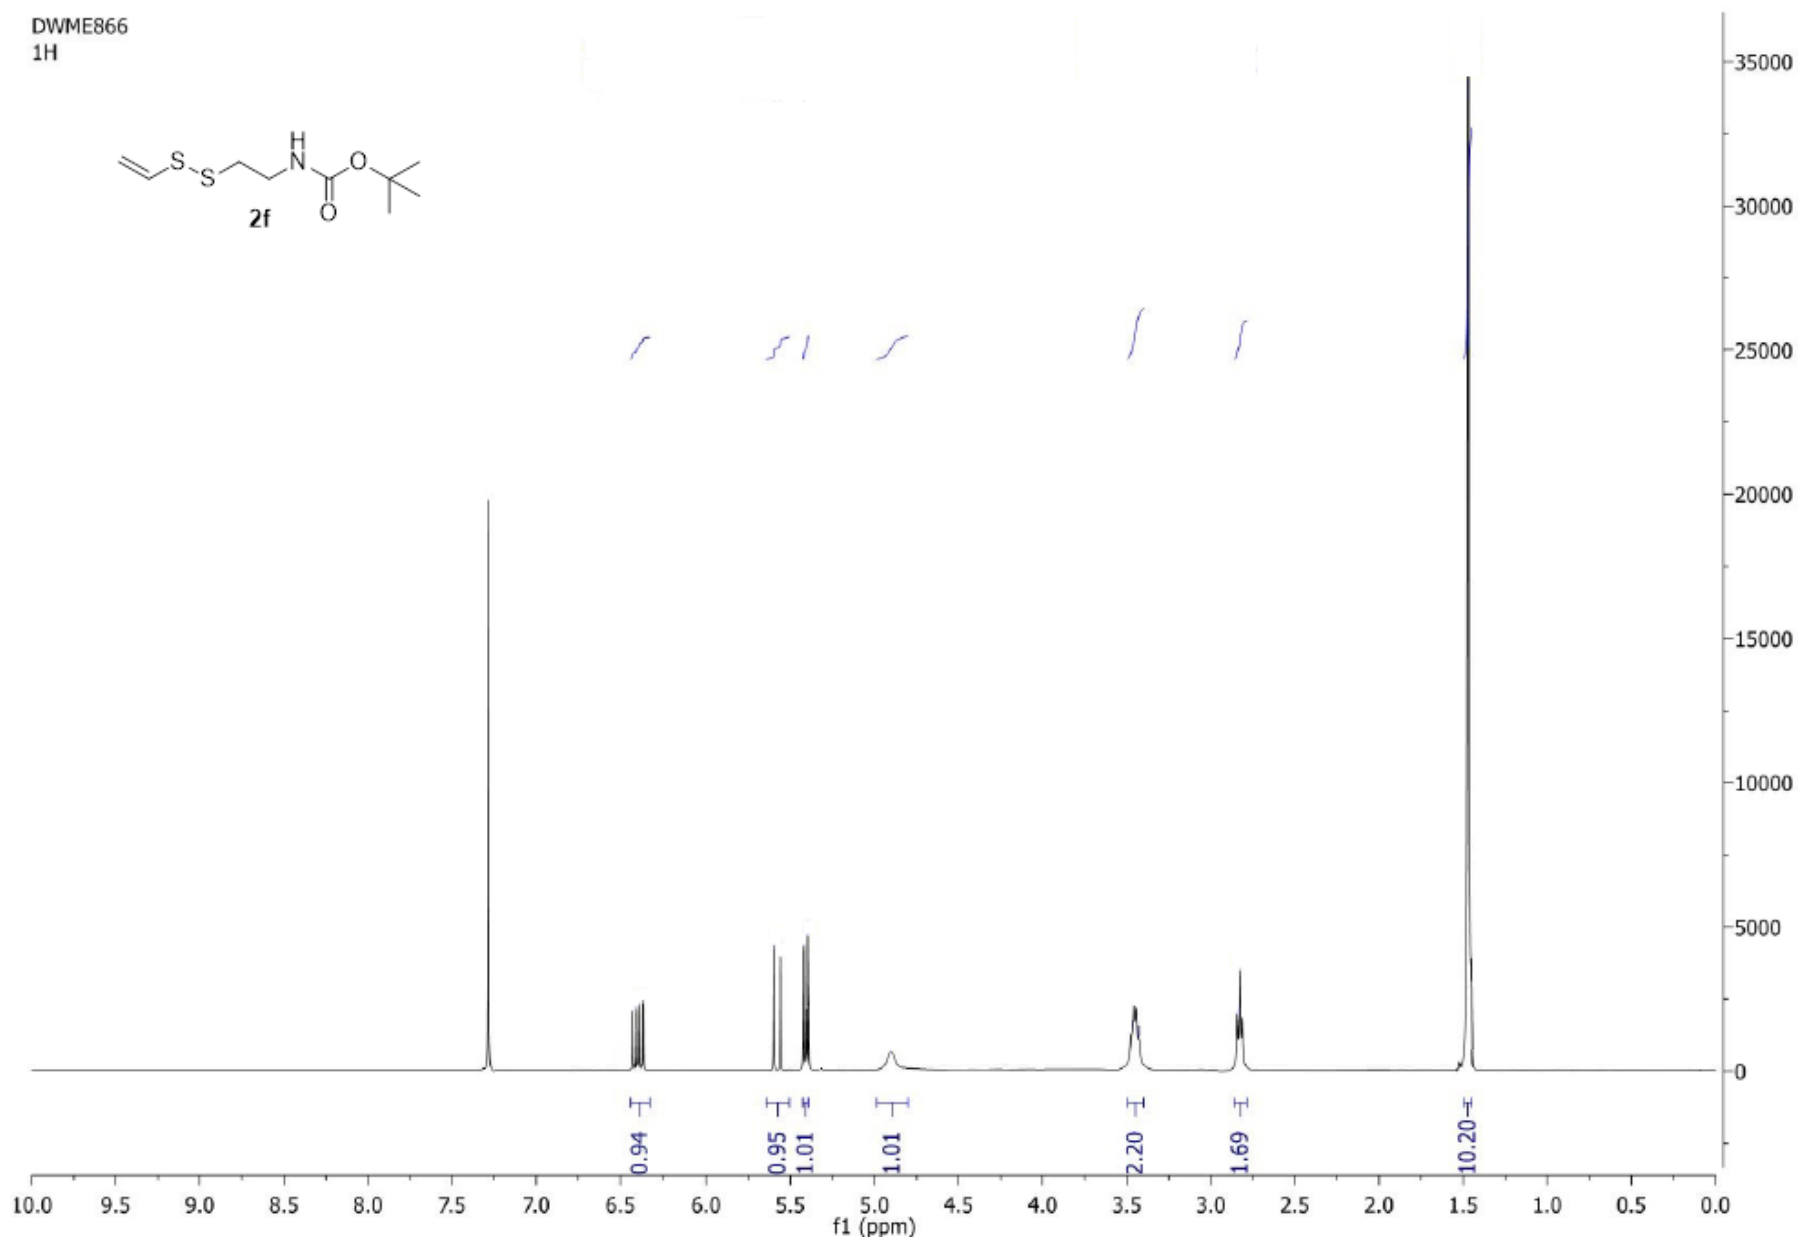

S44

DWME866  
13C

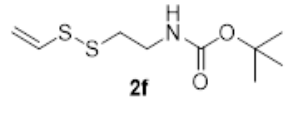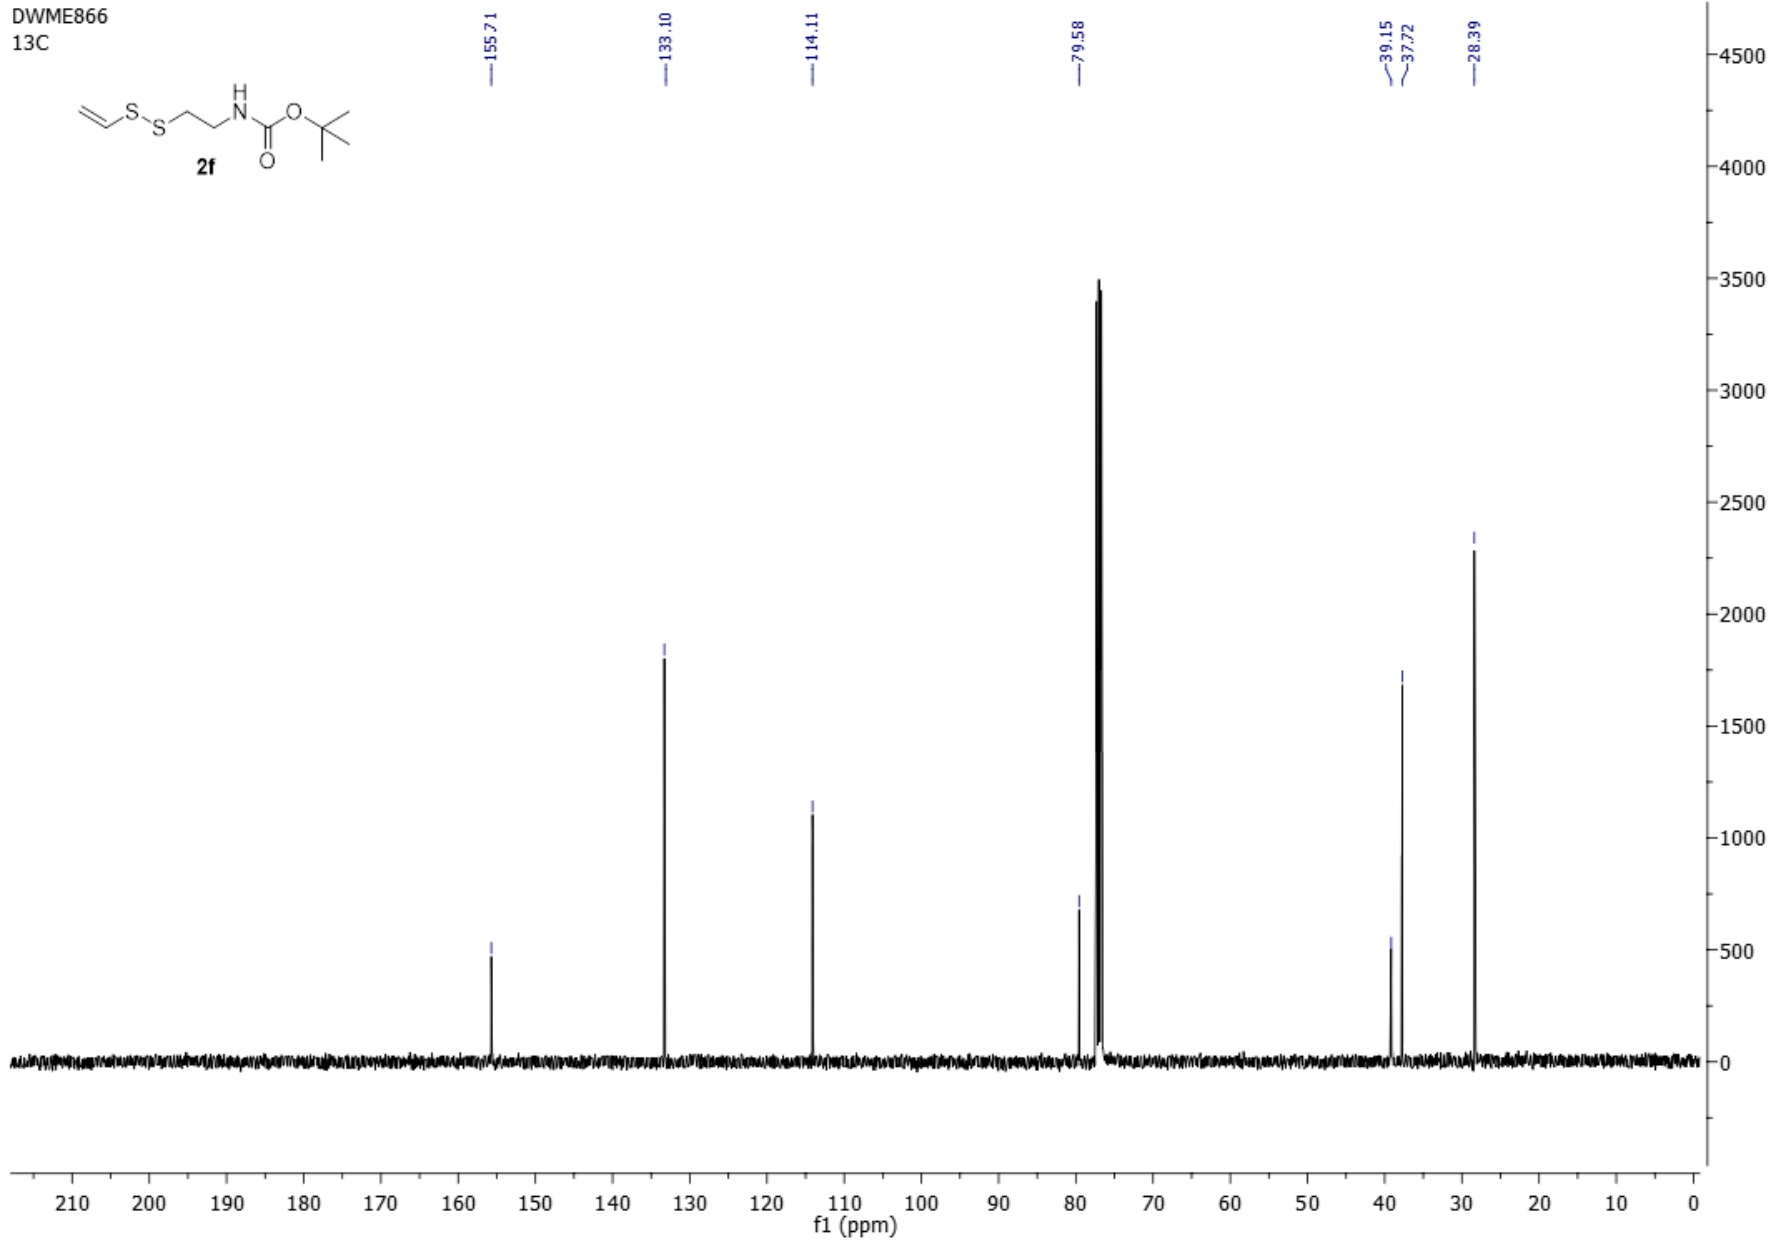

DWME864  
1H

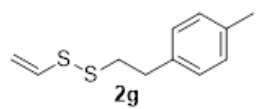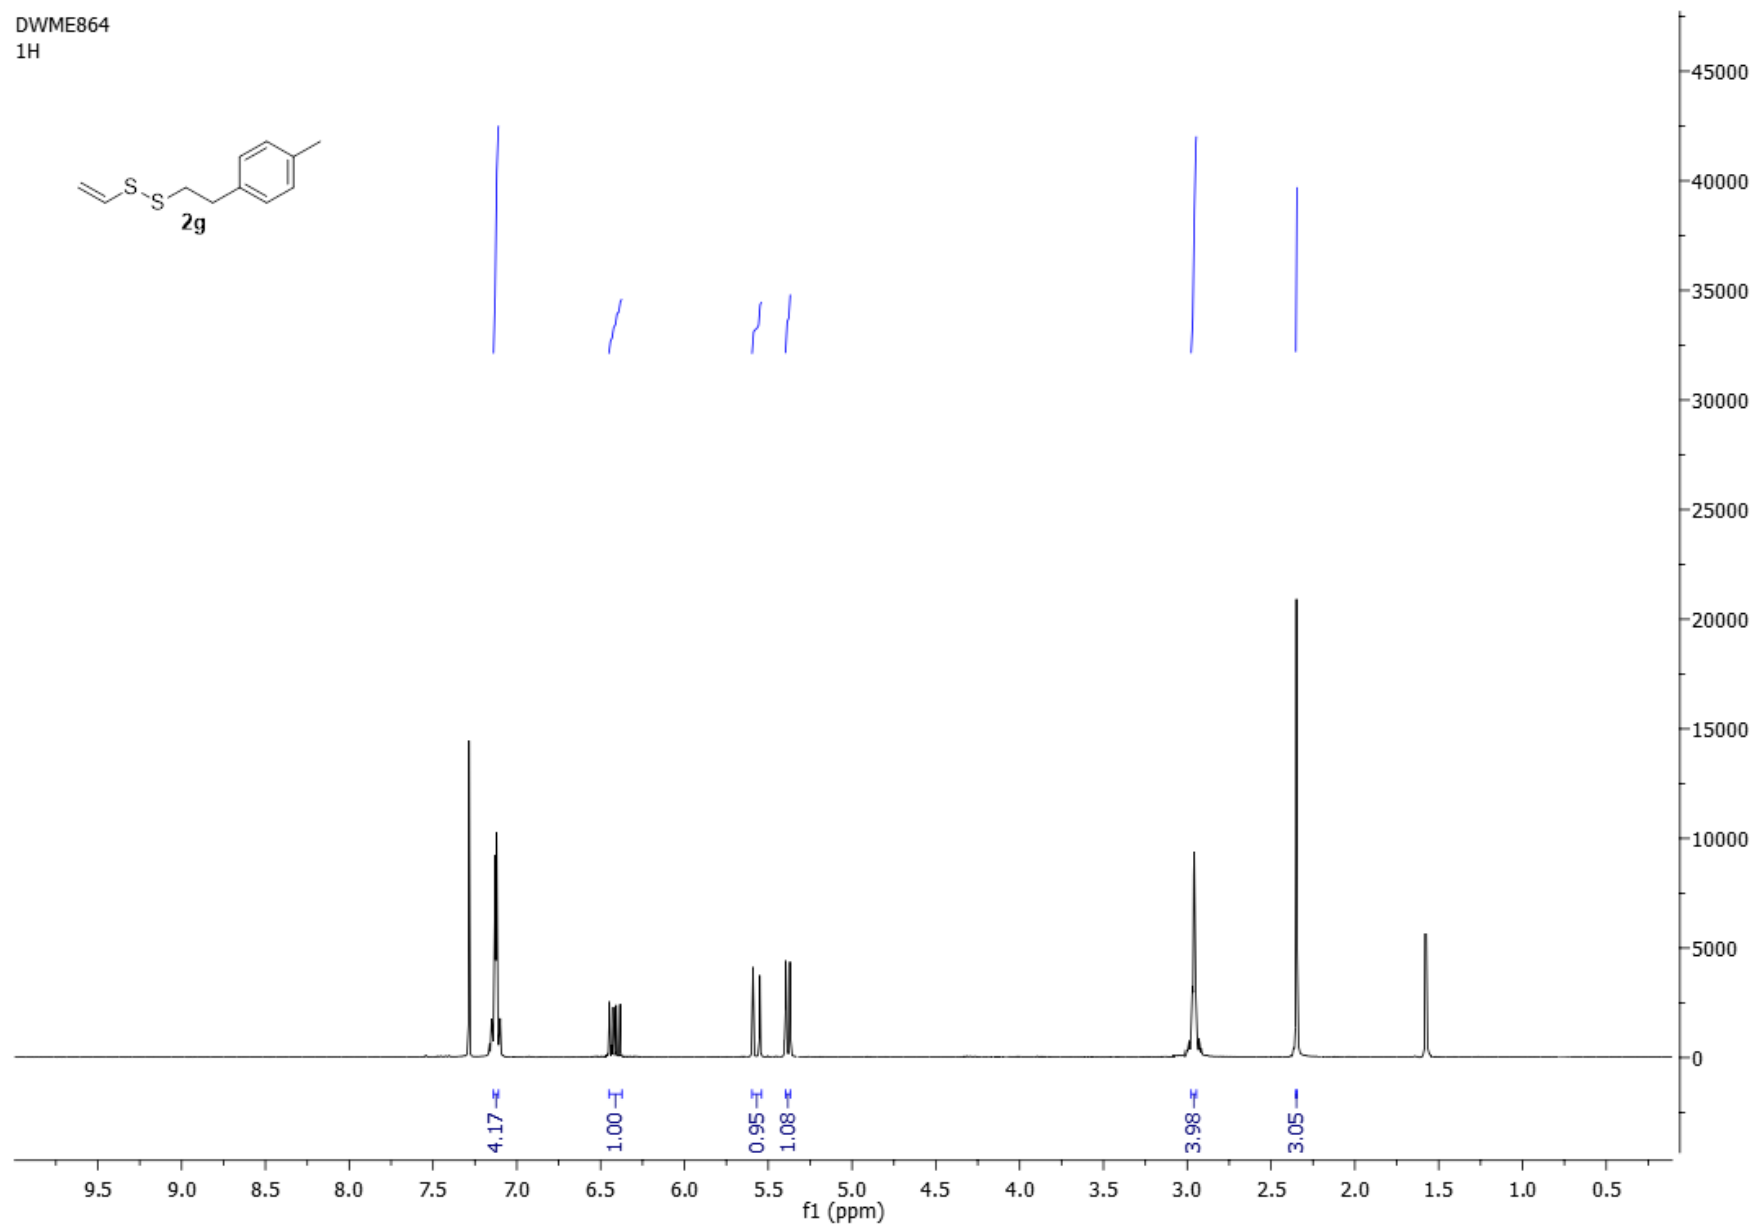

DWME863  
13C

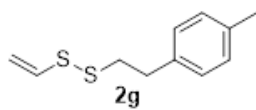

133.52  
129.21  
129.19  
128.48  
128.47

113.54

39.34

35.11

21.05

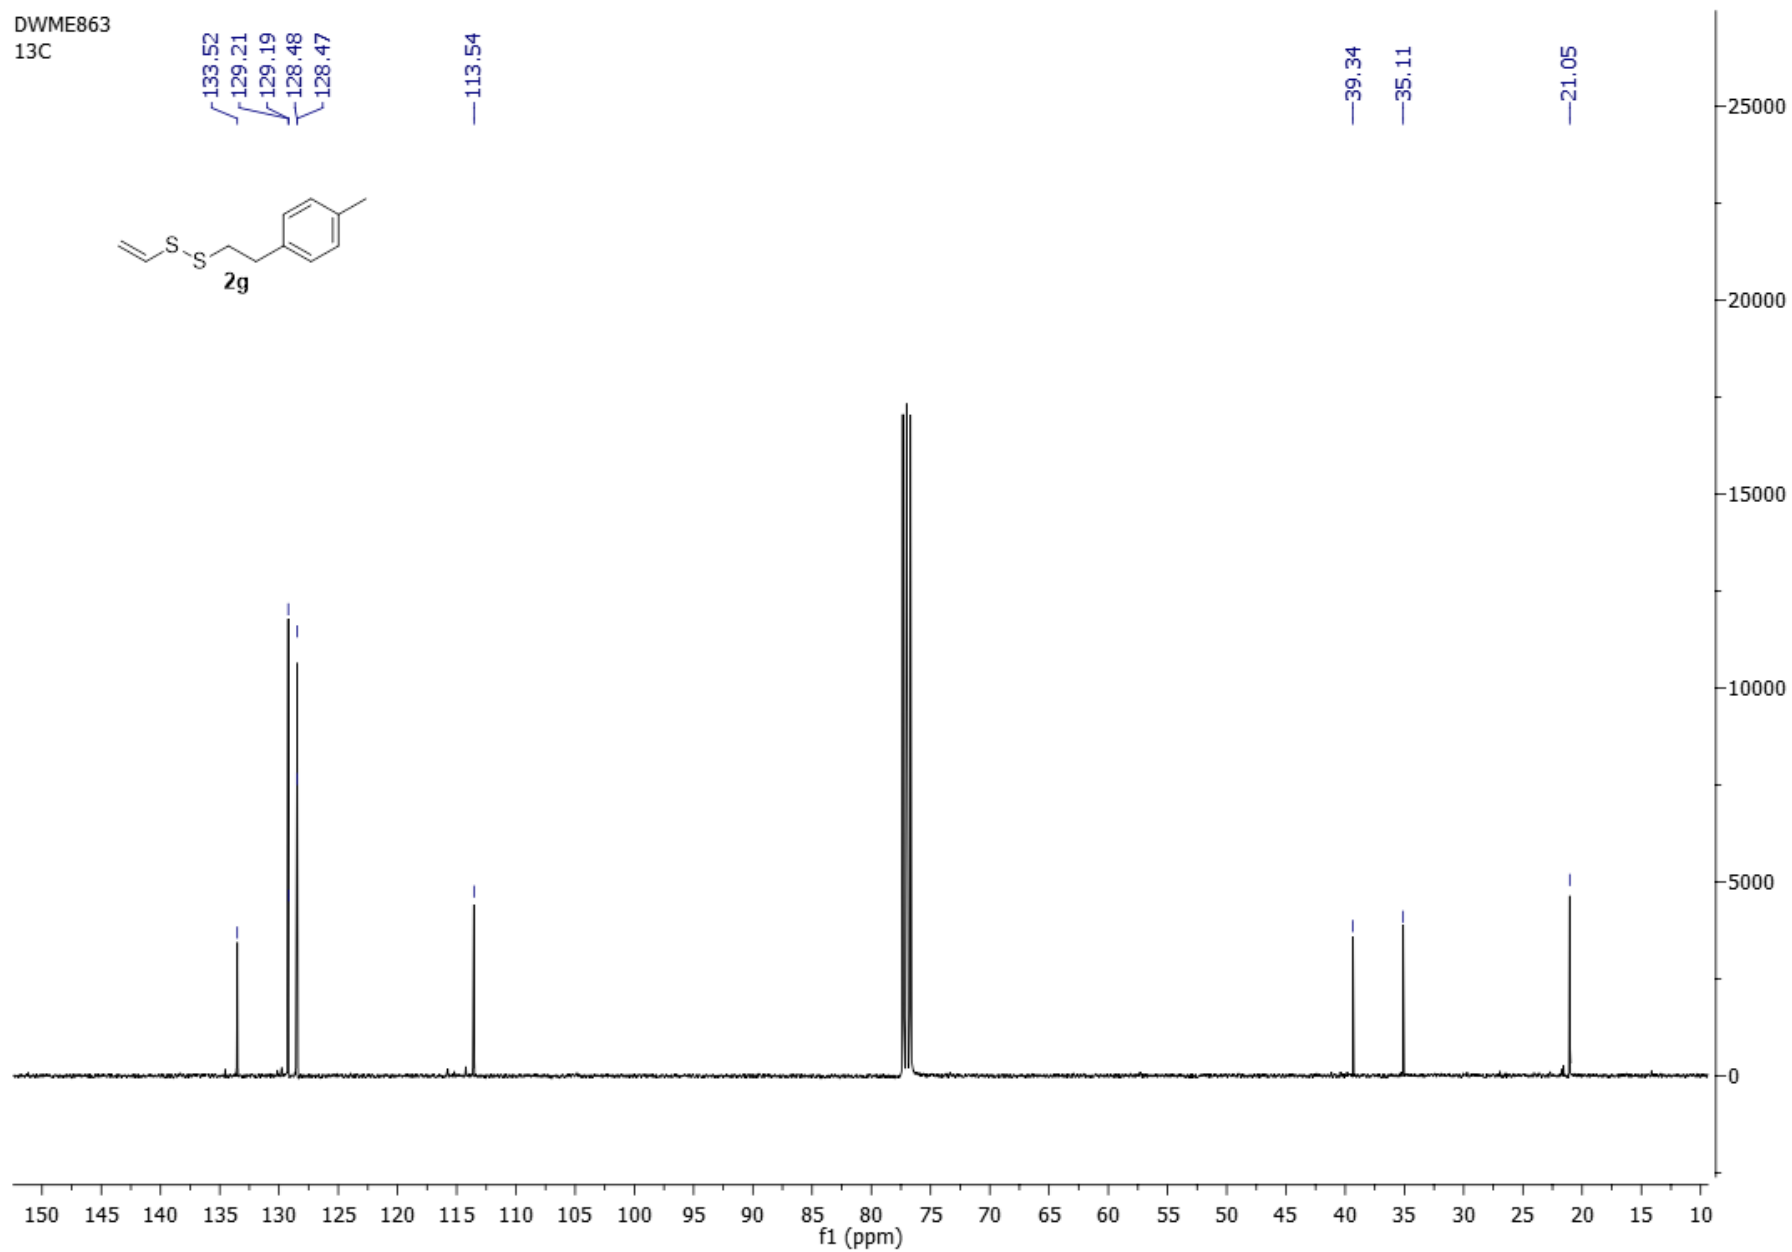

DWME872  
1H

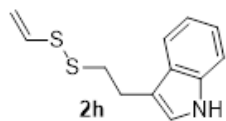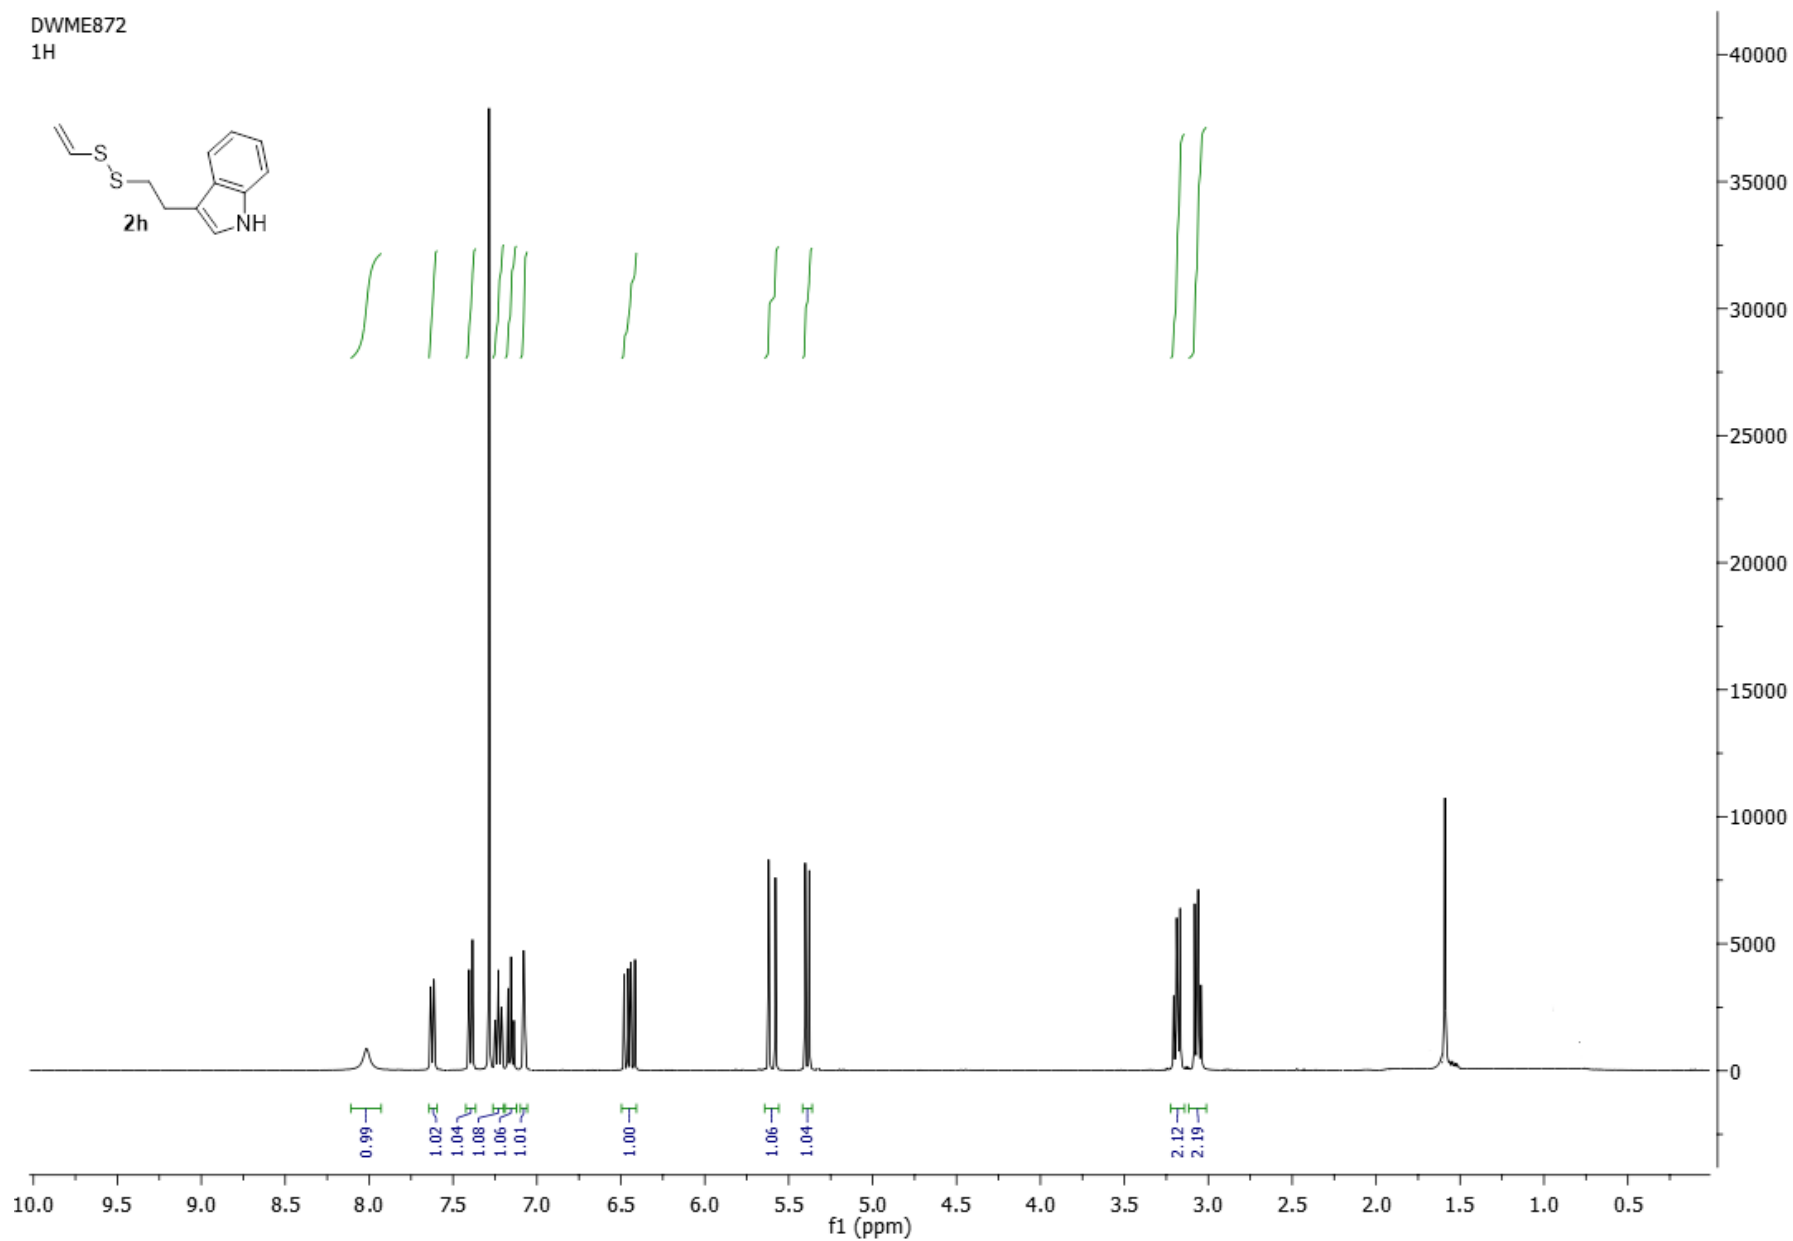

S48



DWME872  
13C

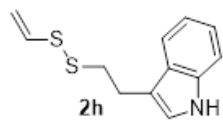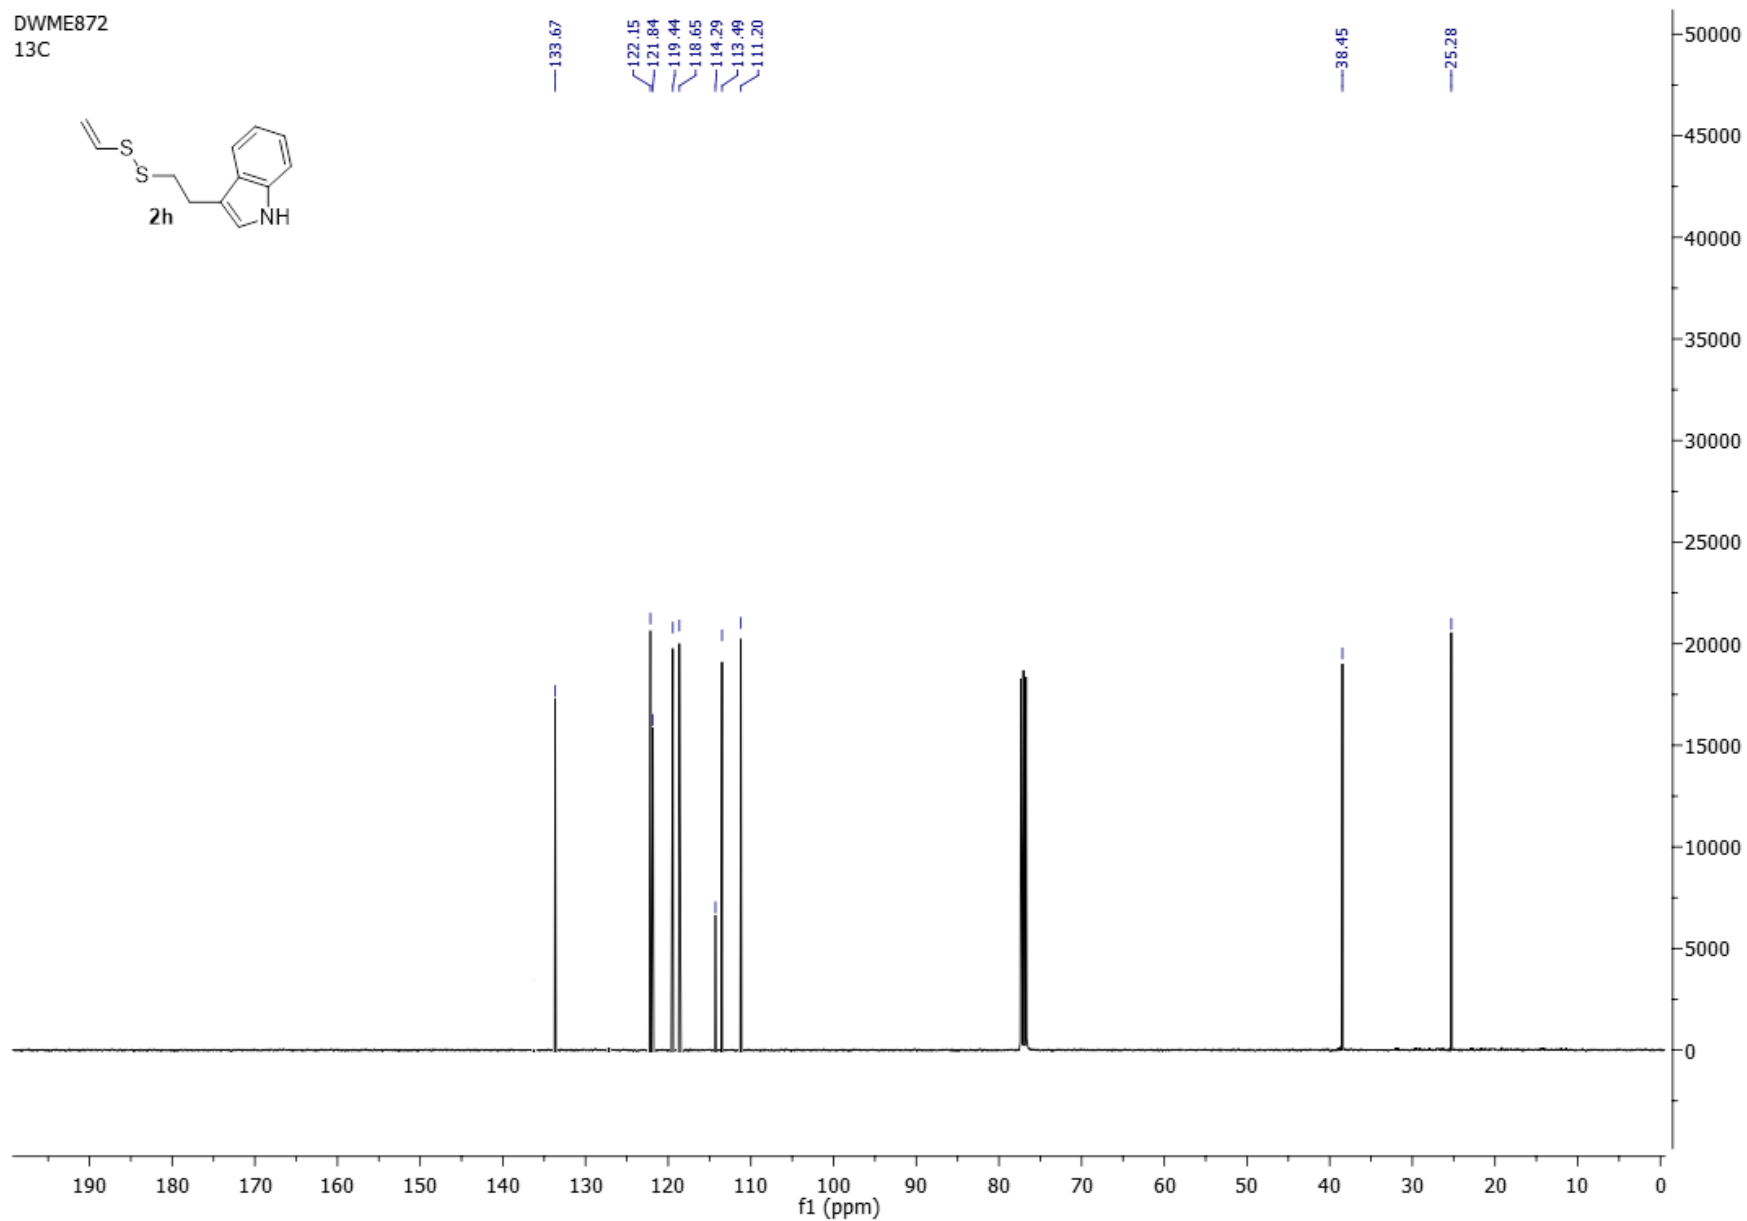

DWME873  
1H

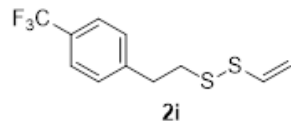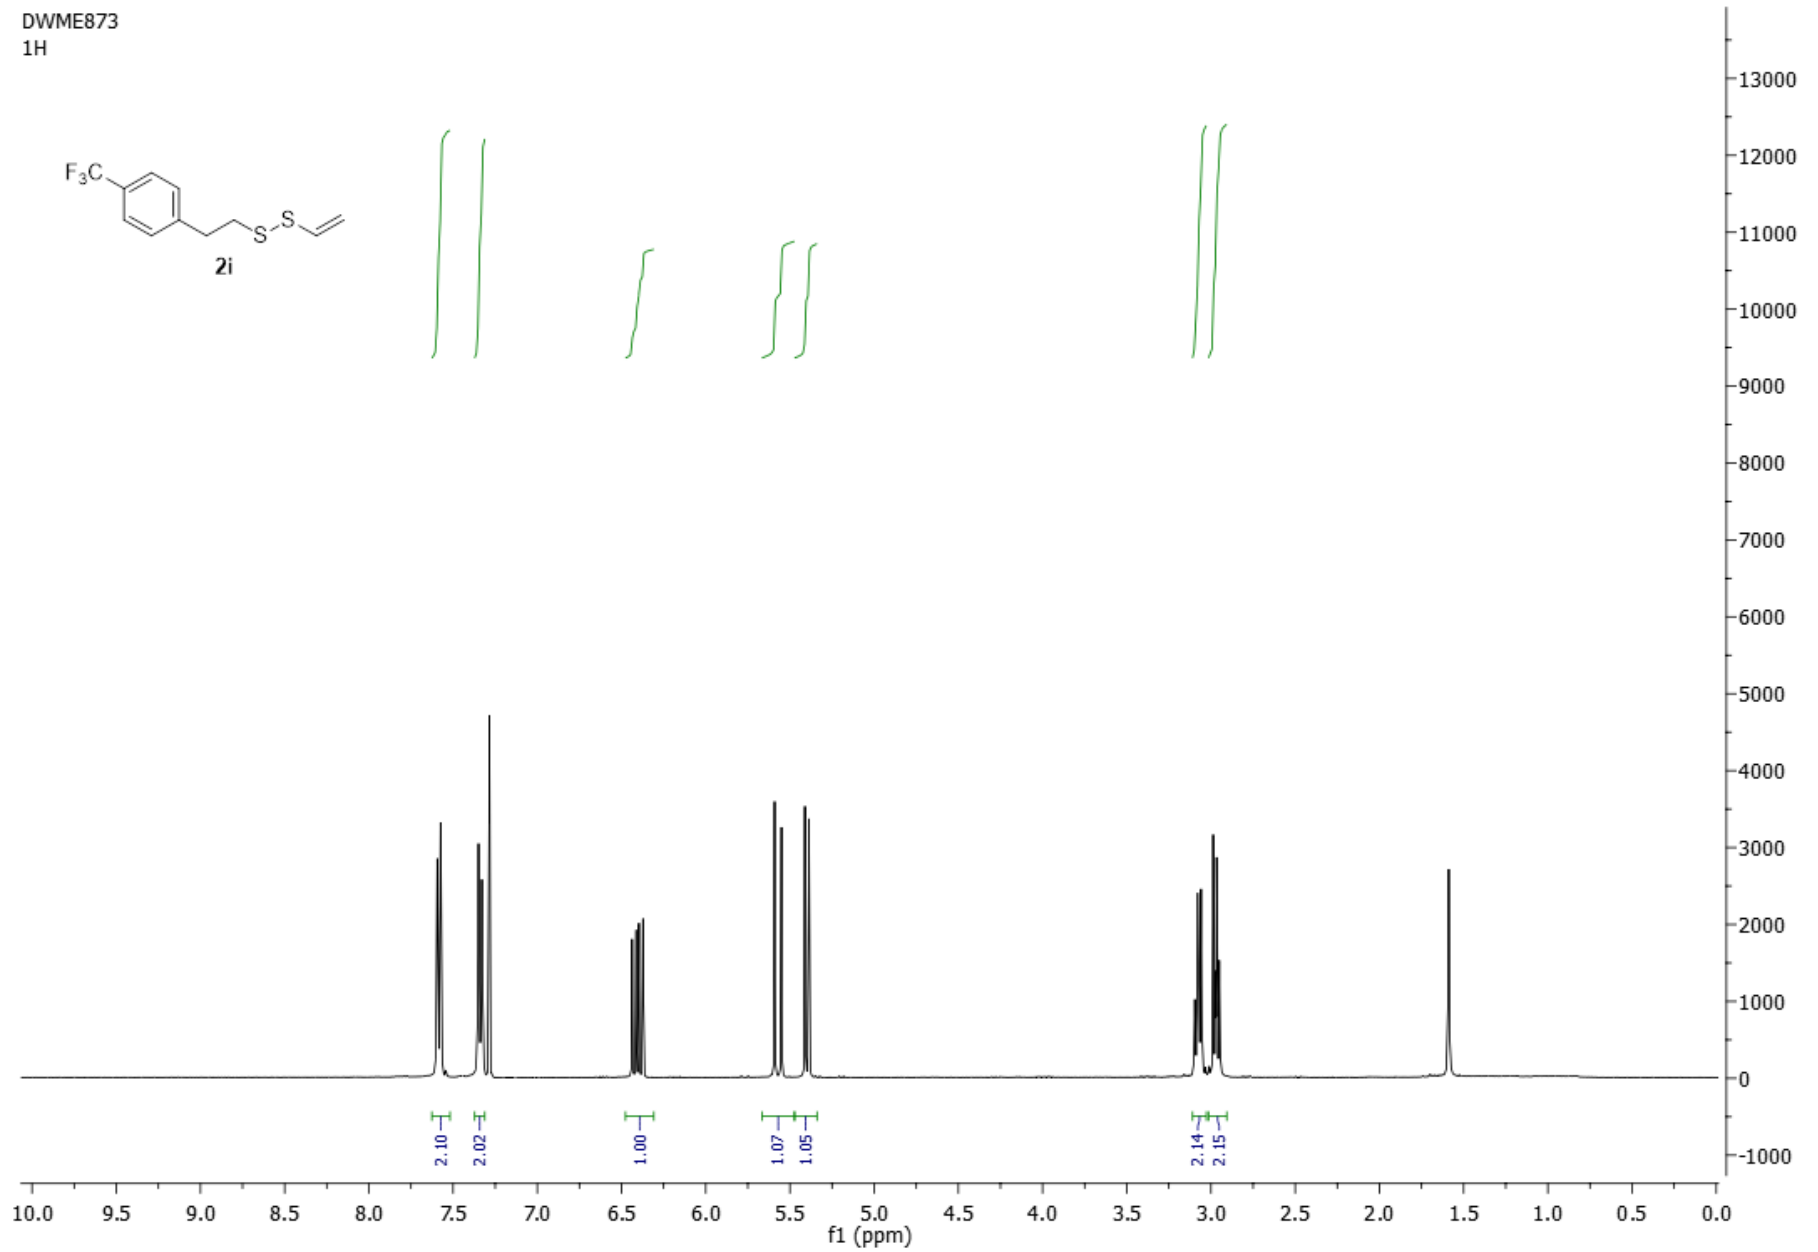

S50

DWME873  
13C

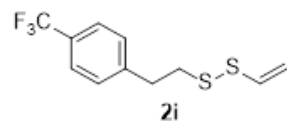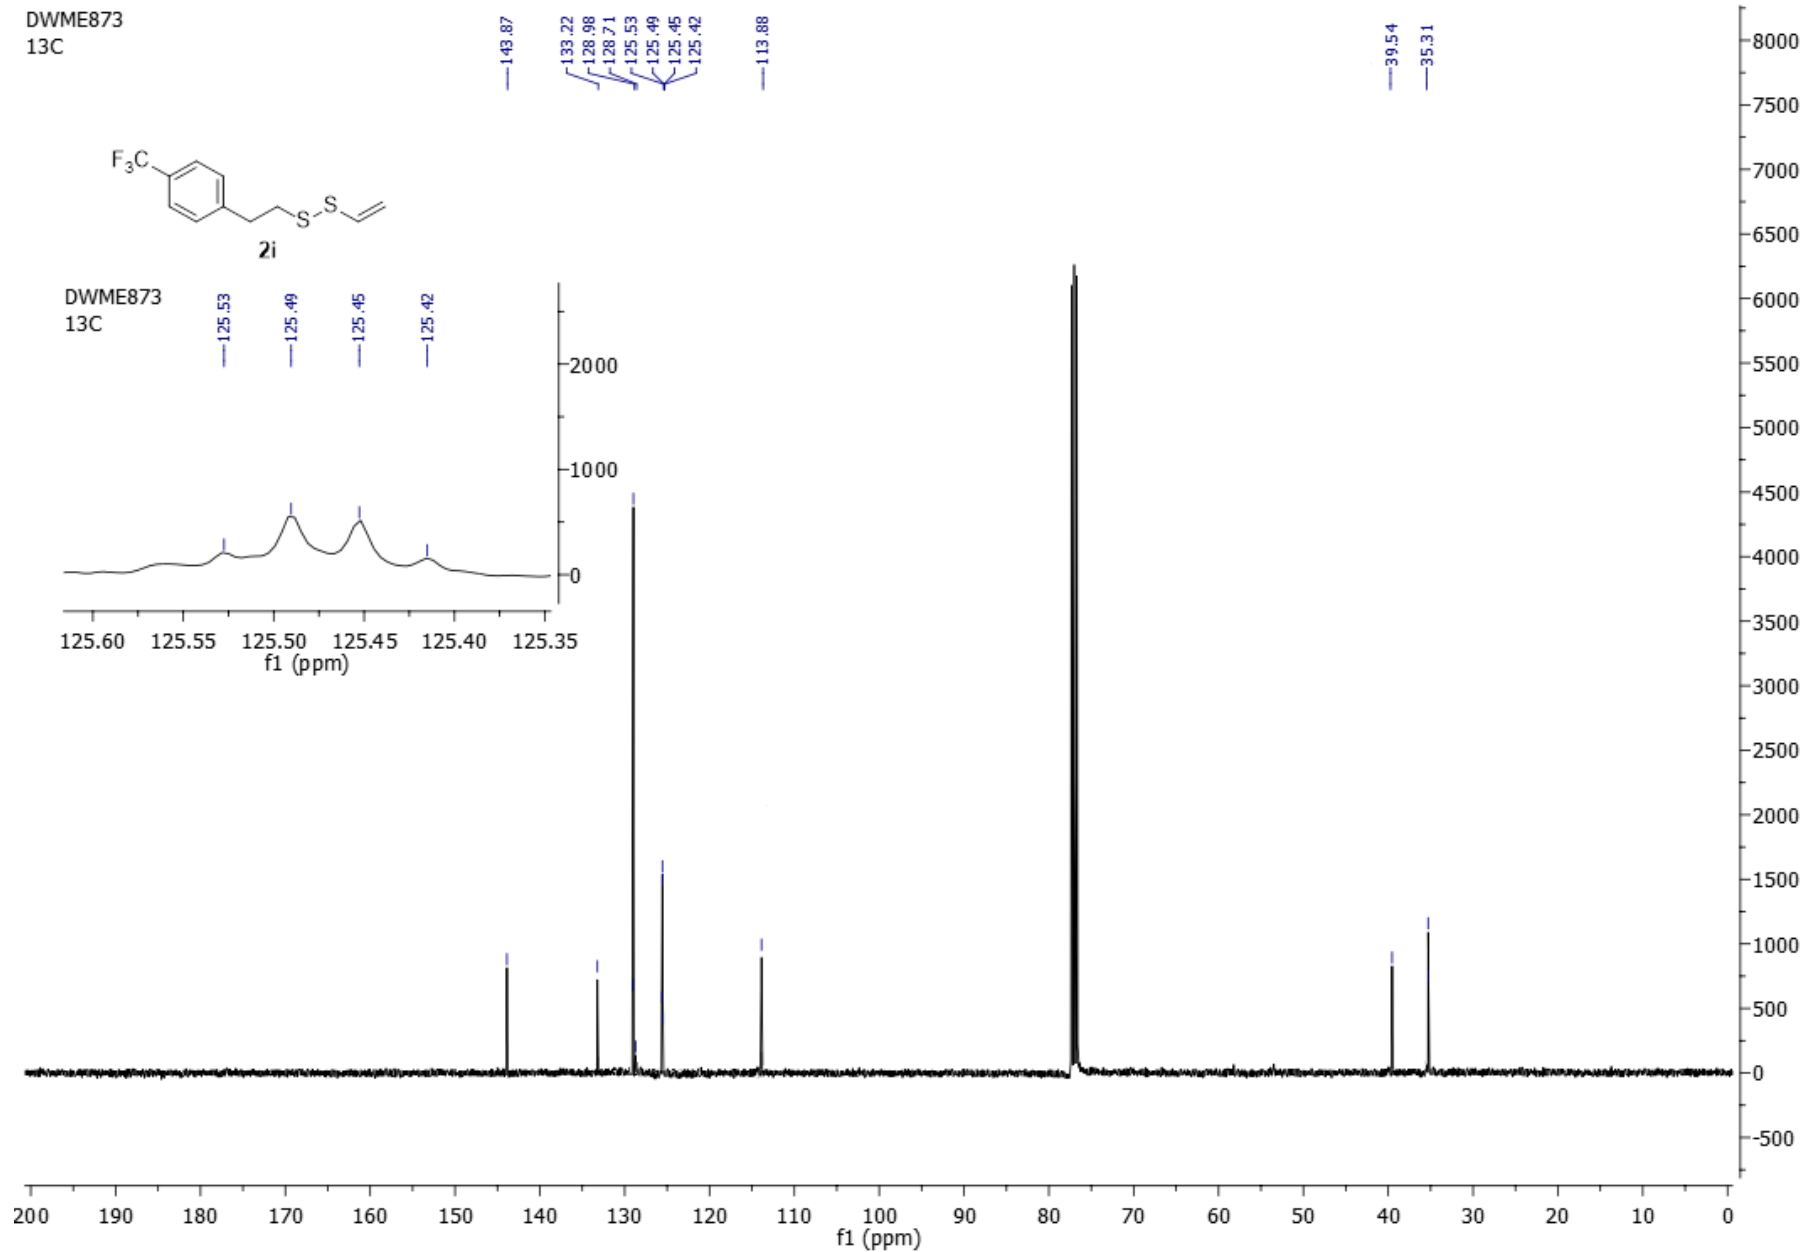

S51

DWBJ181  
1H

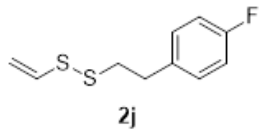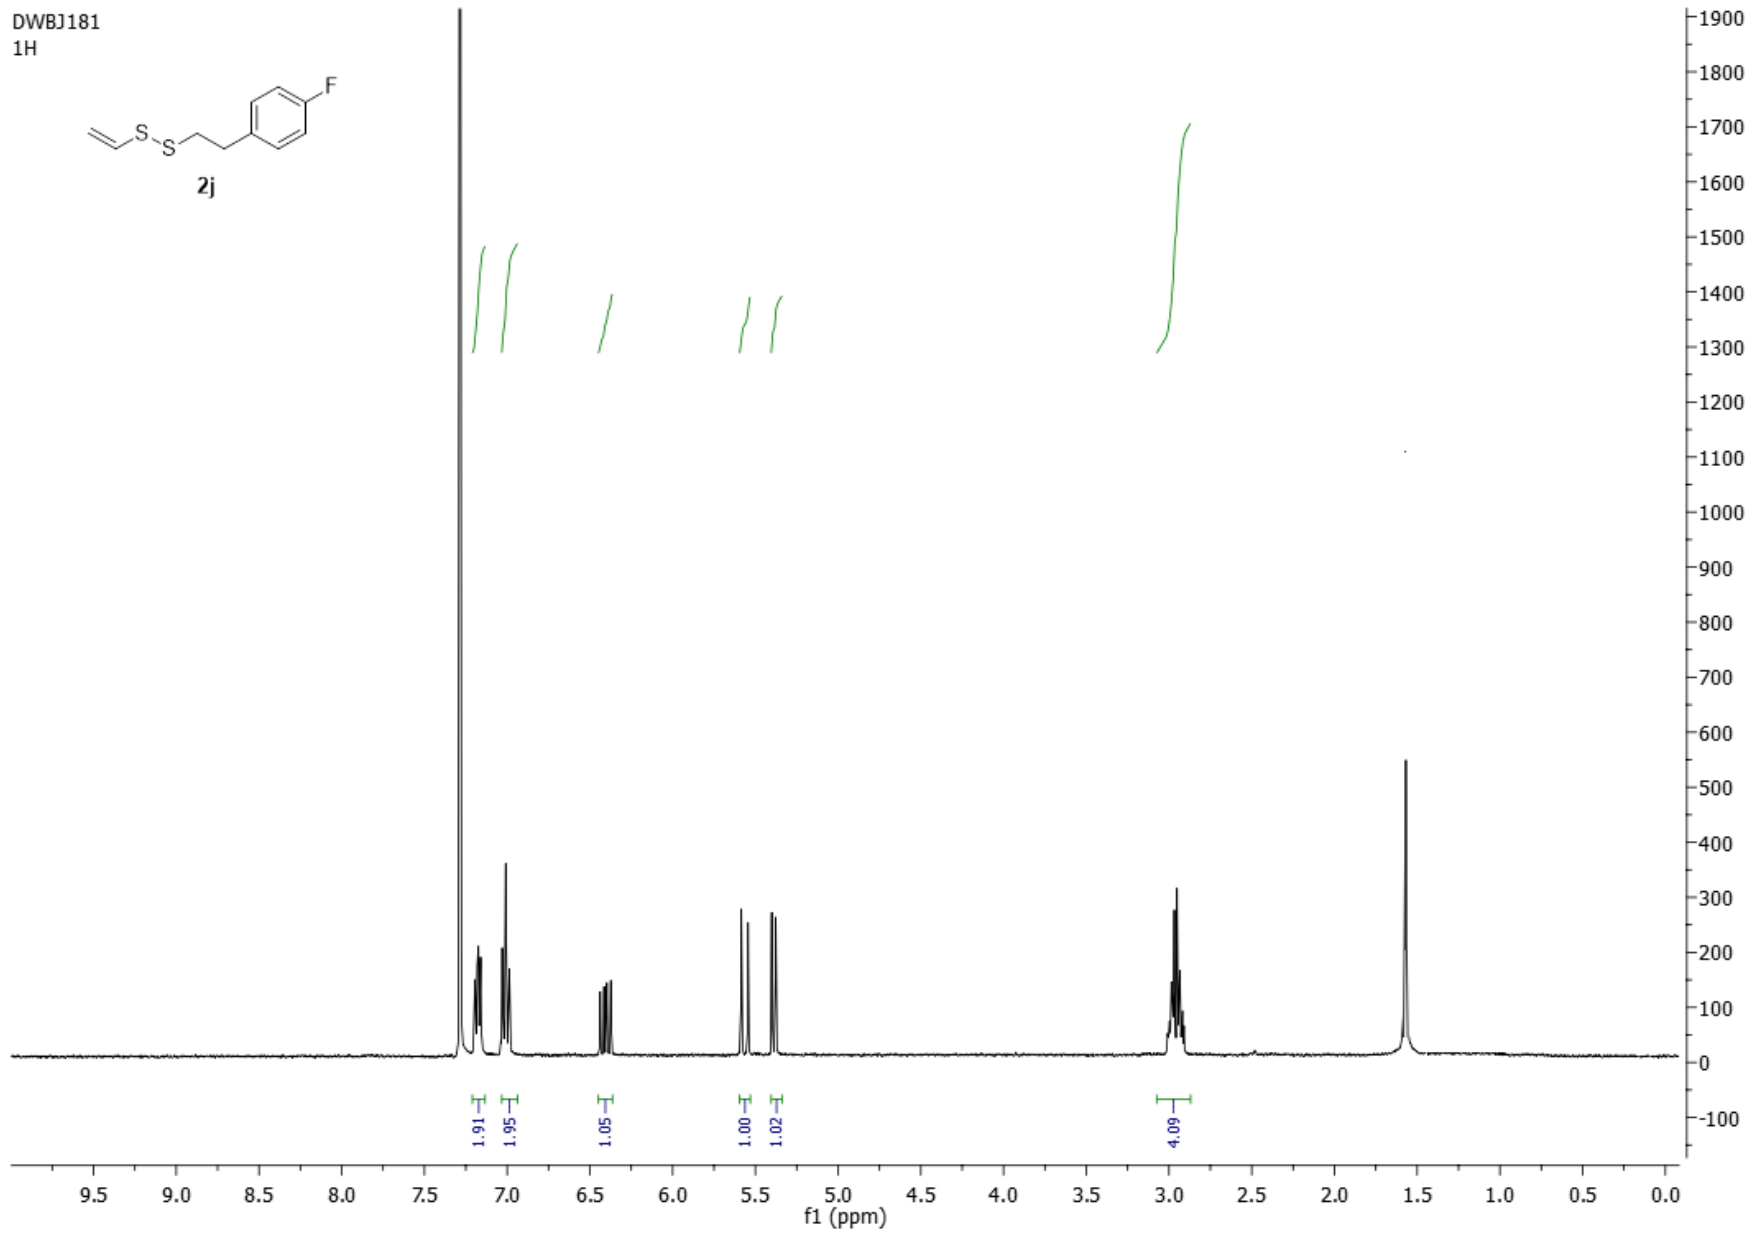

DWBJ181  
13C

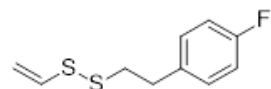

2j

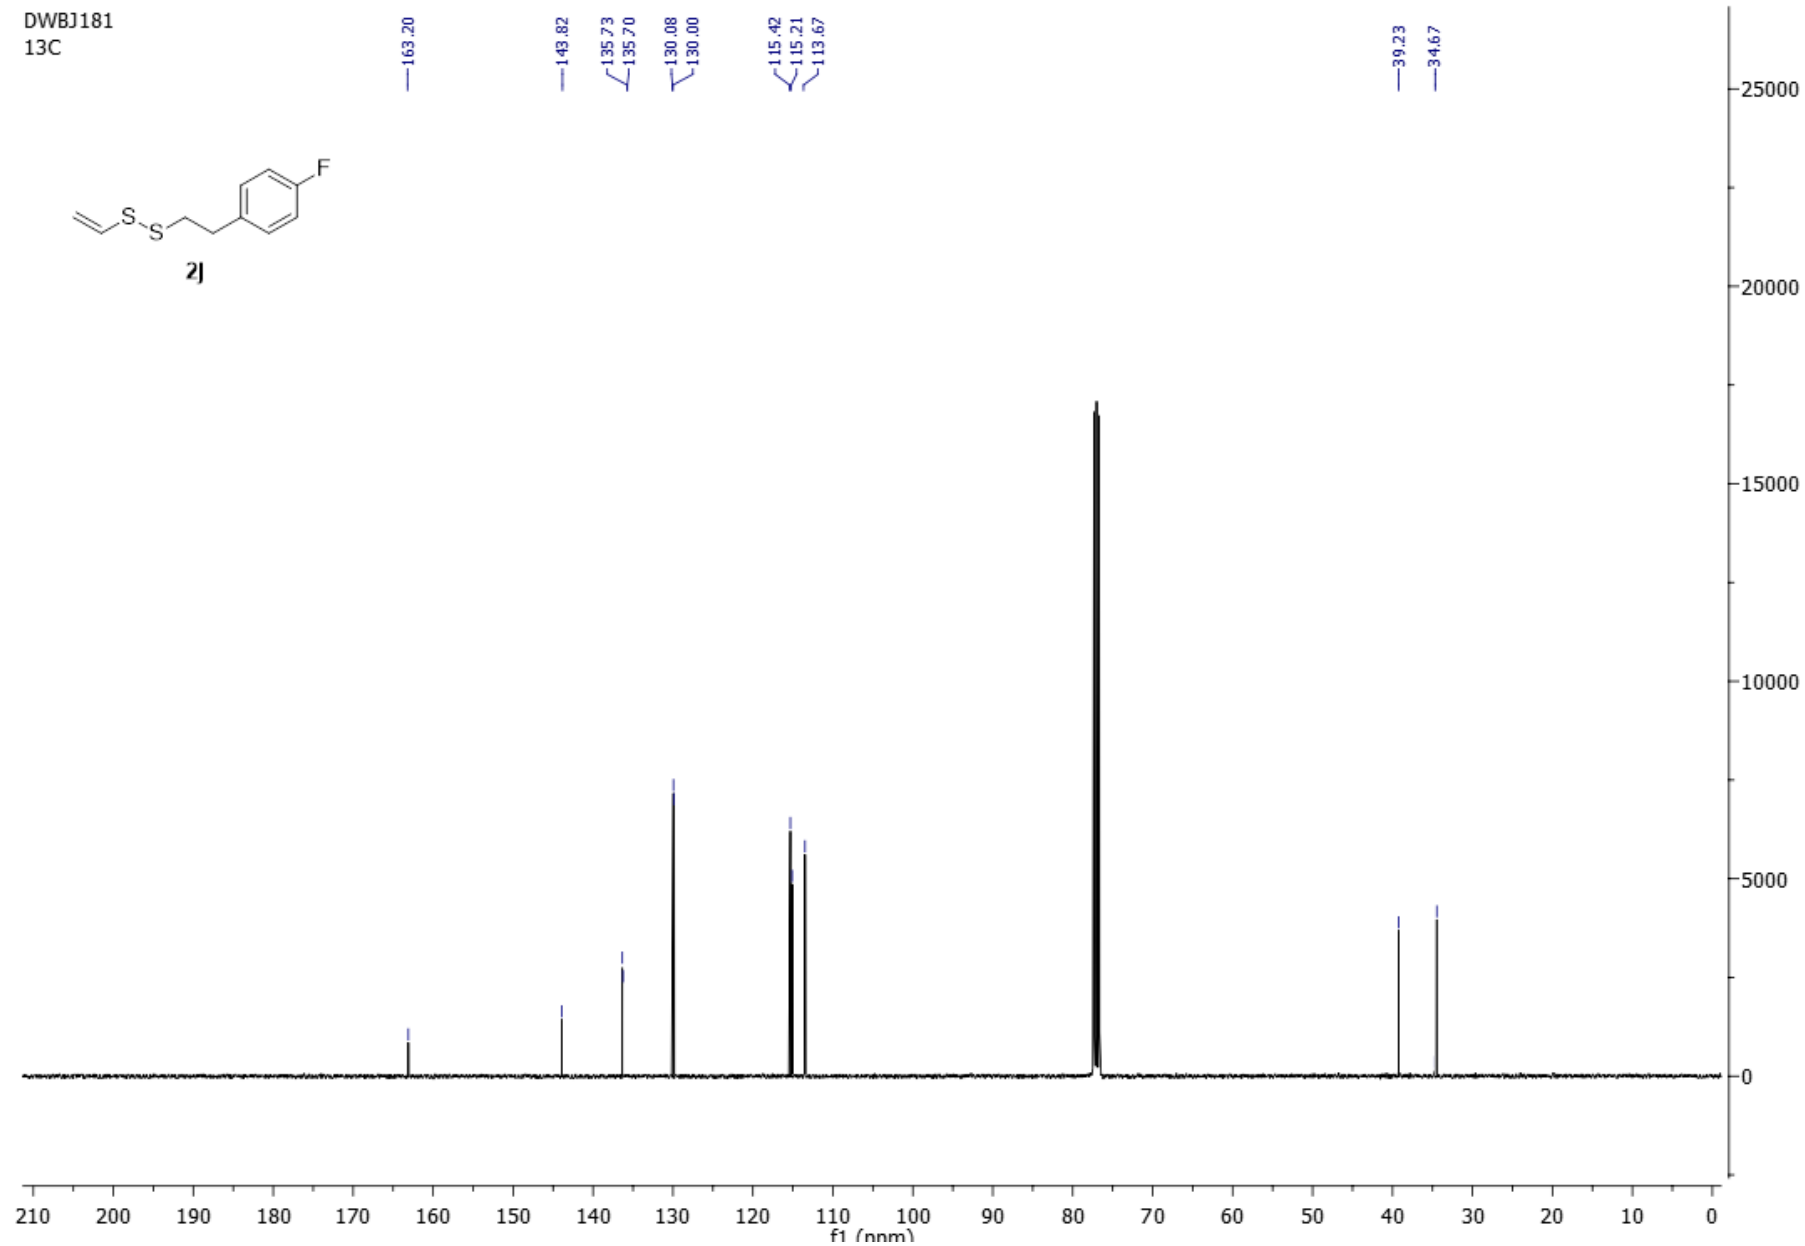

DWBJ187F1  
1H

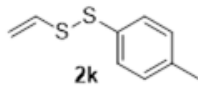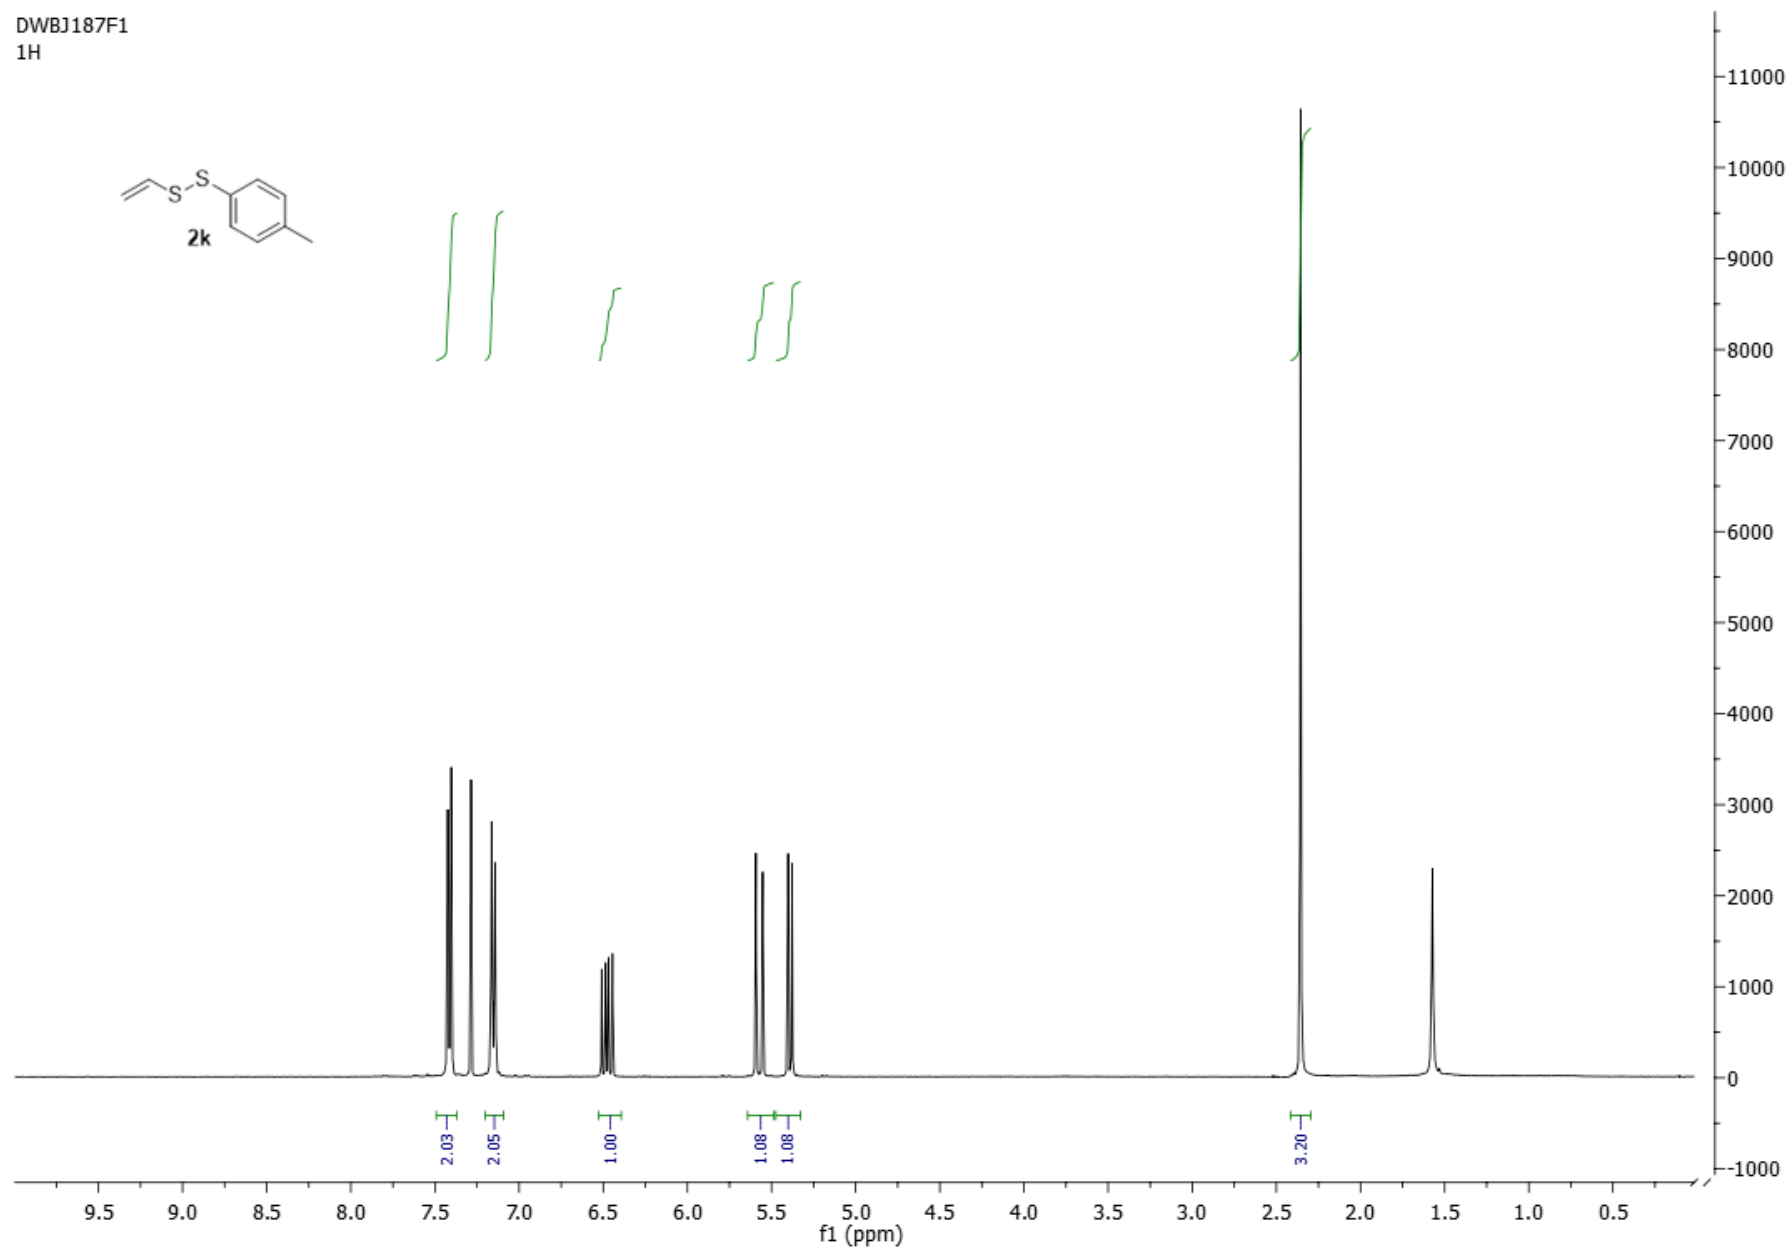

S54

DWBJ187F1  
13C{1H}

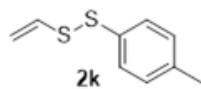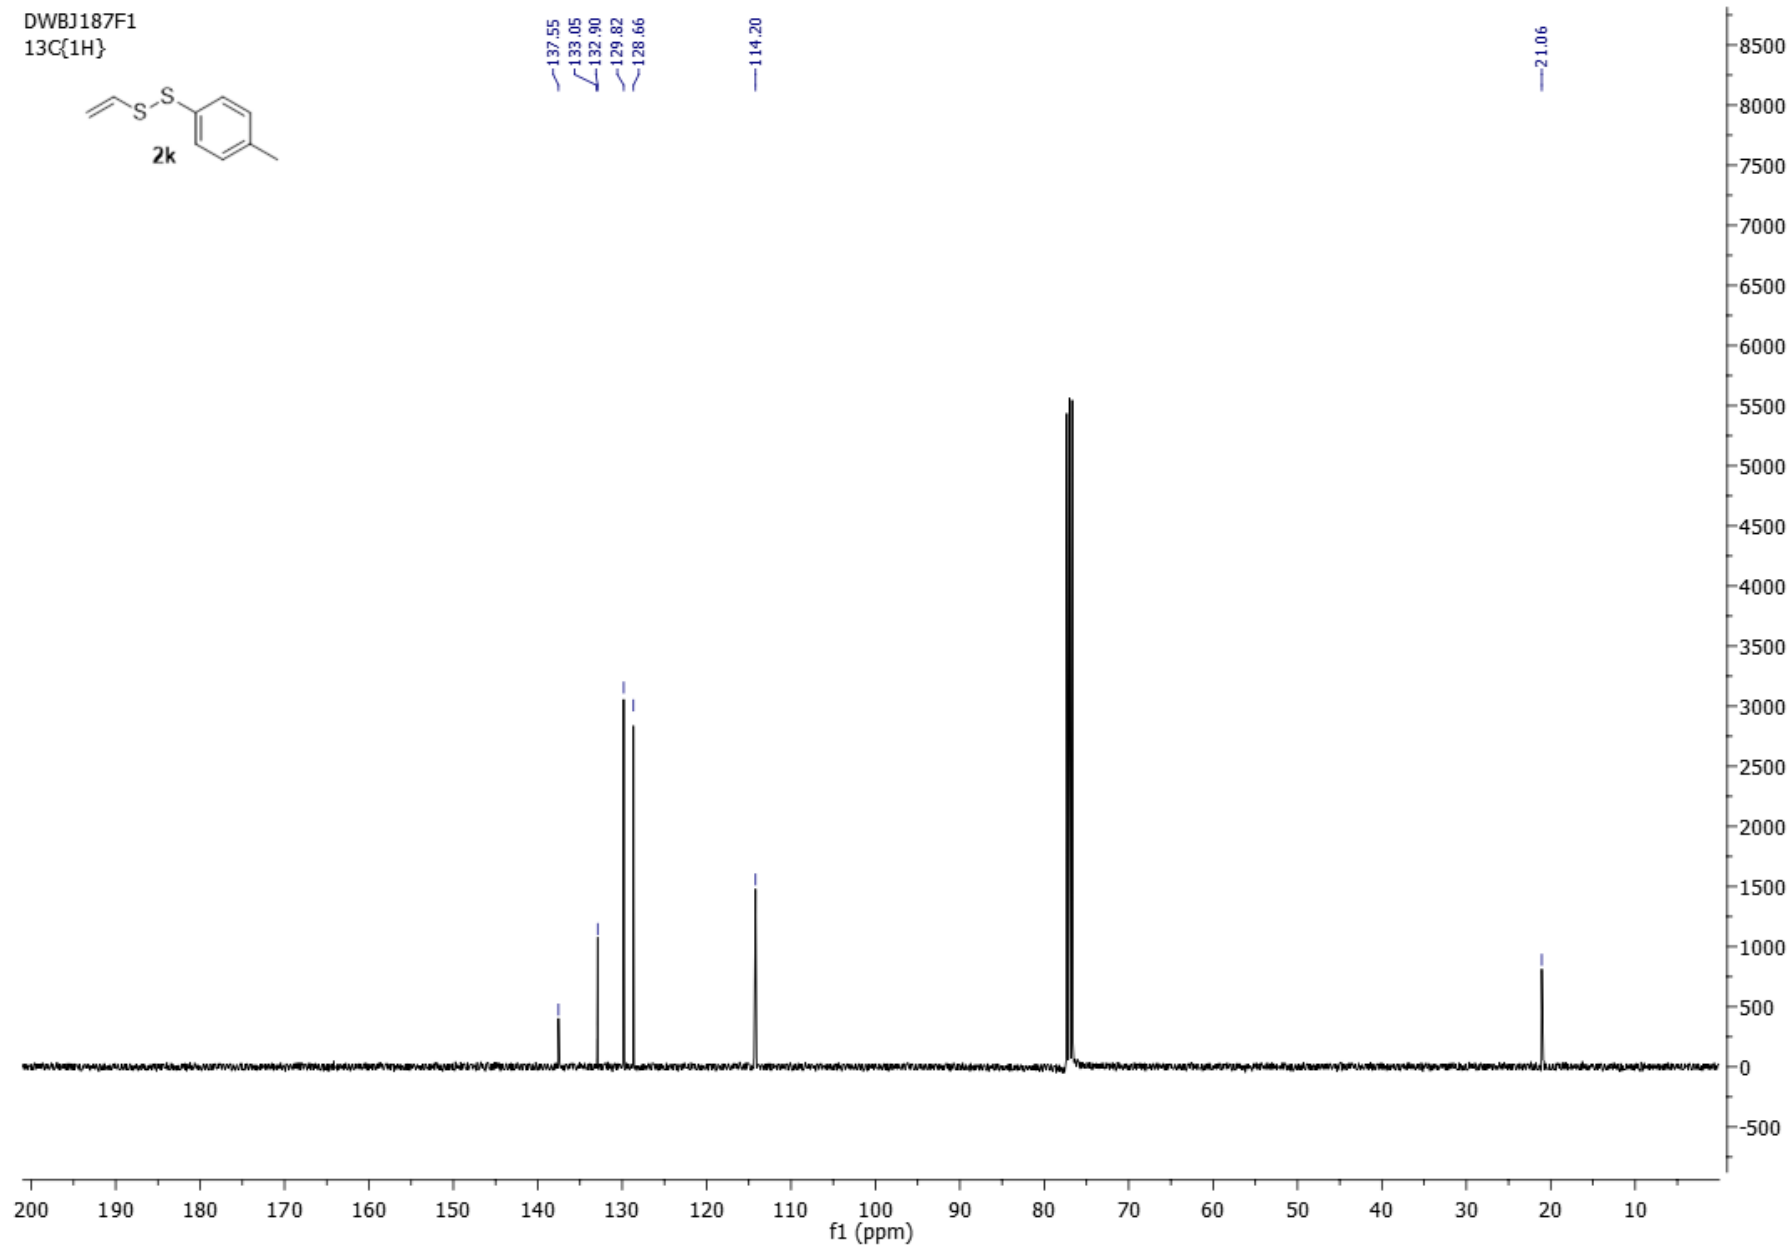

S55

DWBJ175F1  
1H

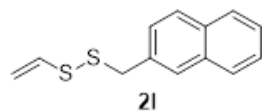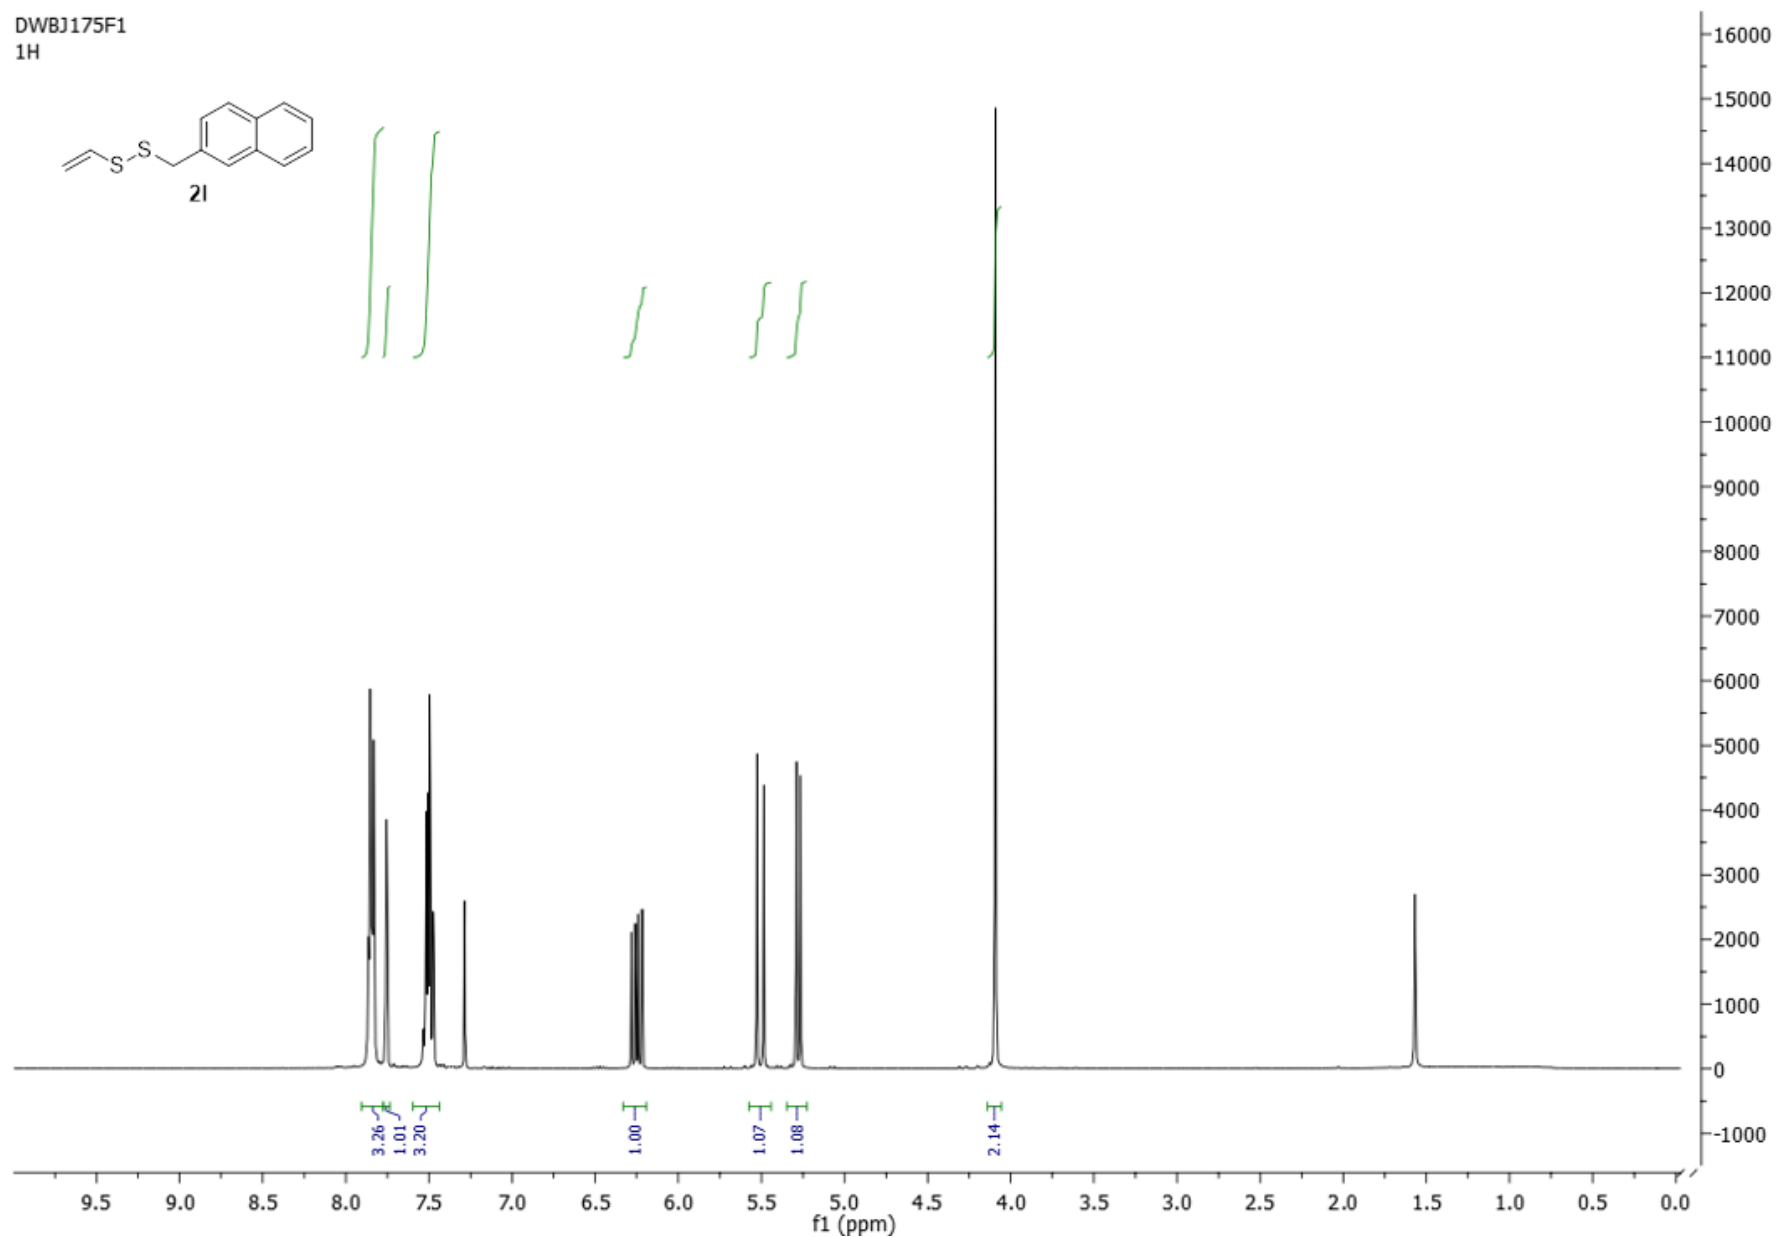



DWBJ175F1  
13C

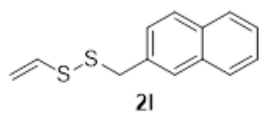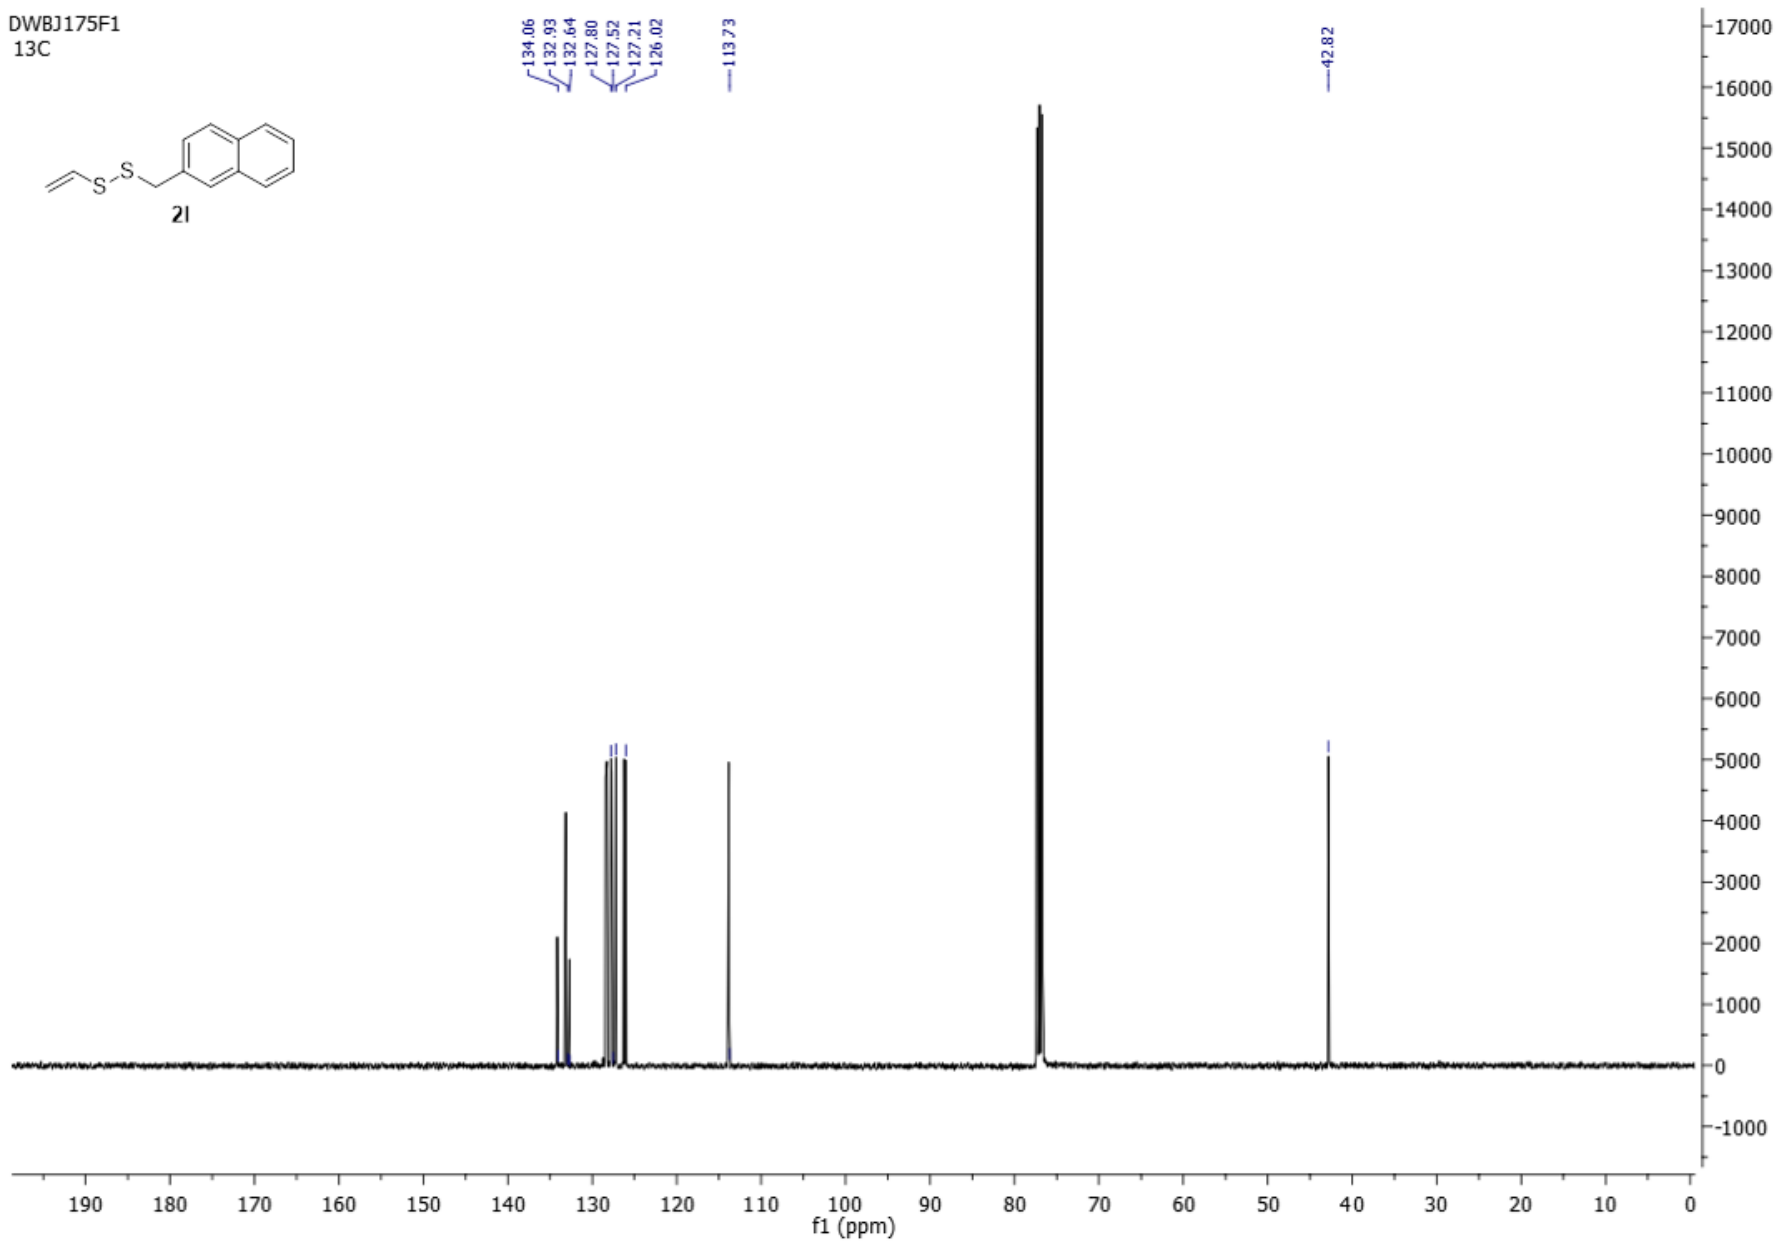

S57

DWBJ189  
1H

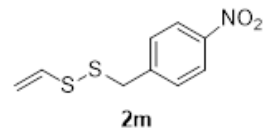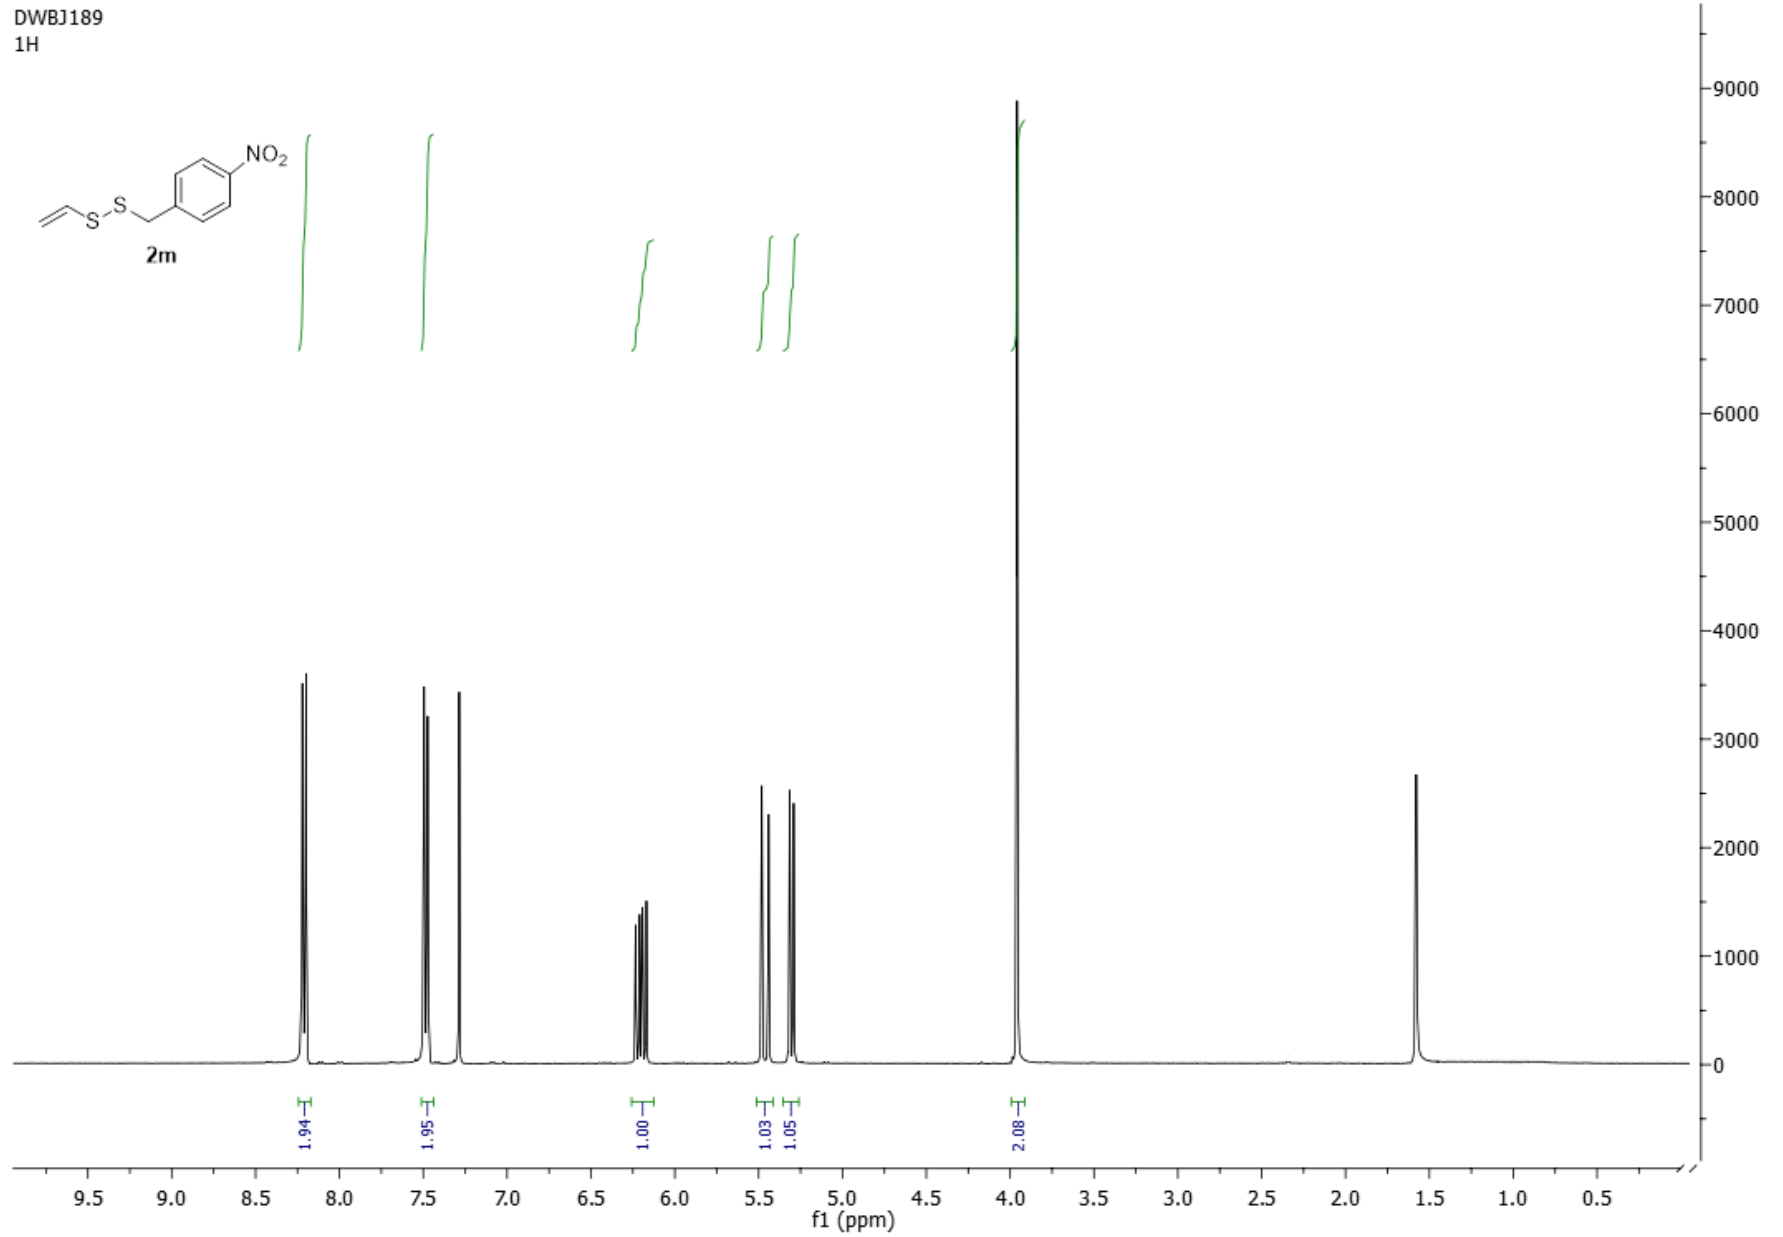

S58

DWBJ189  
13C{1H}

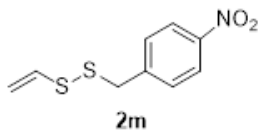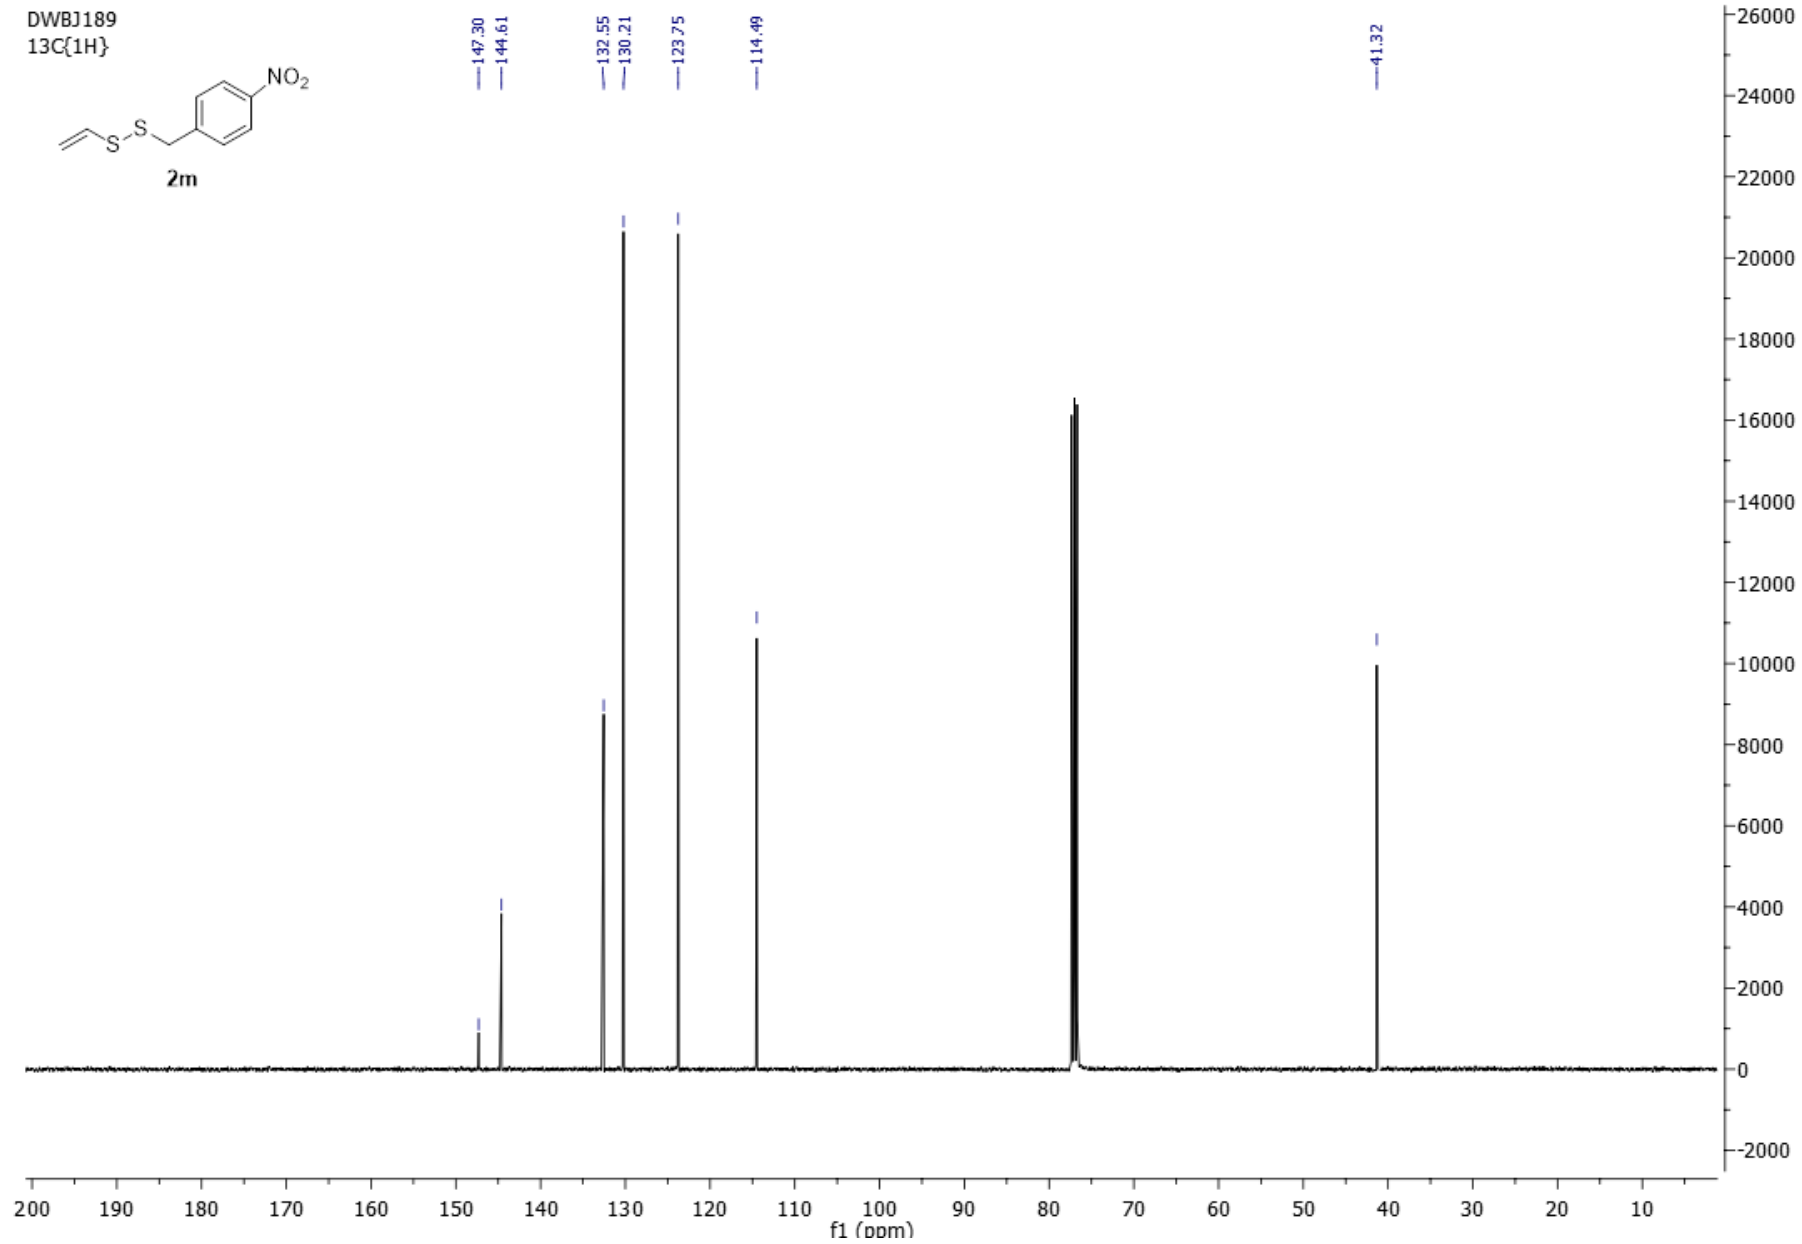

DWBJ193  
1H

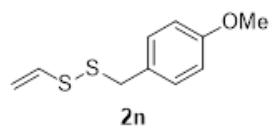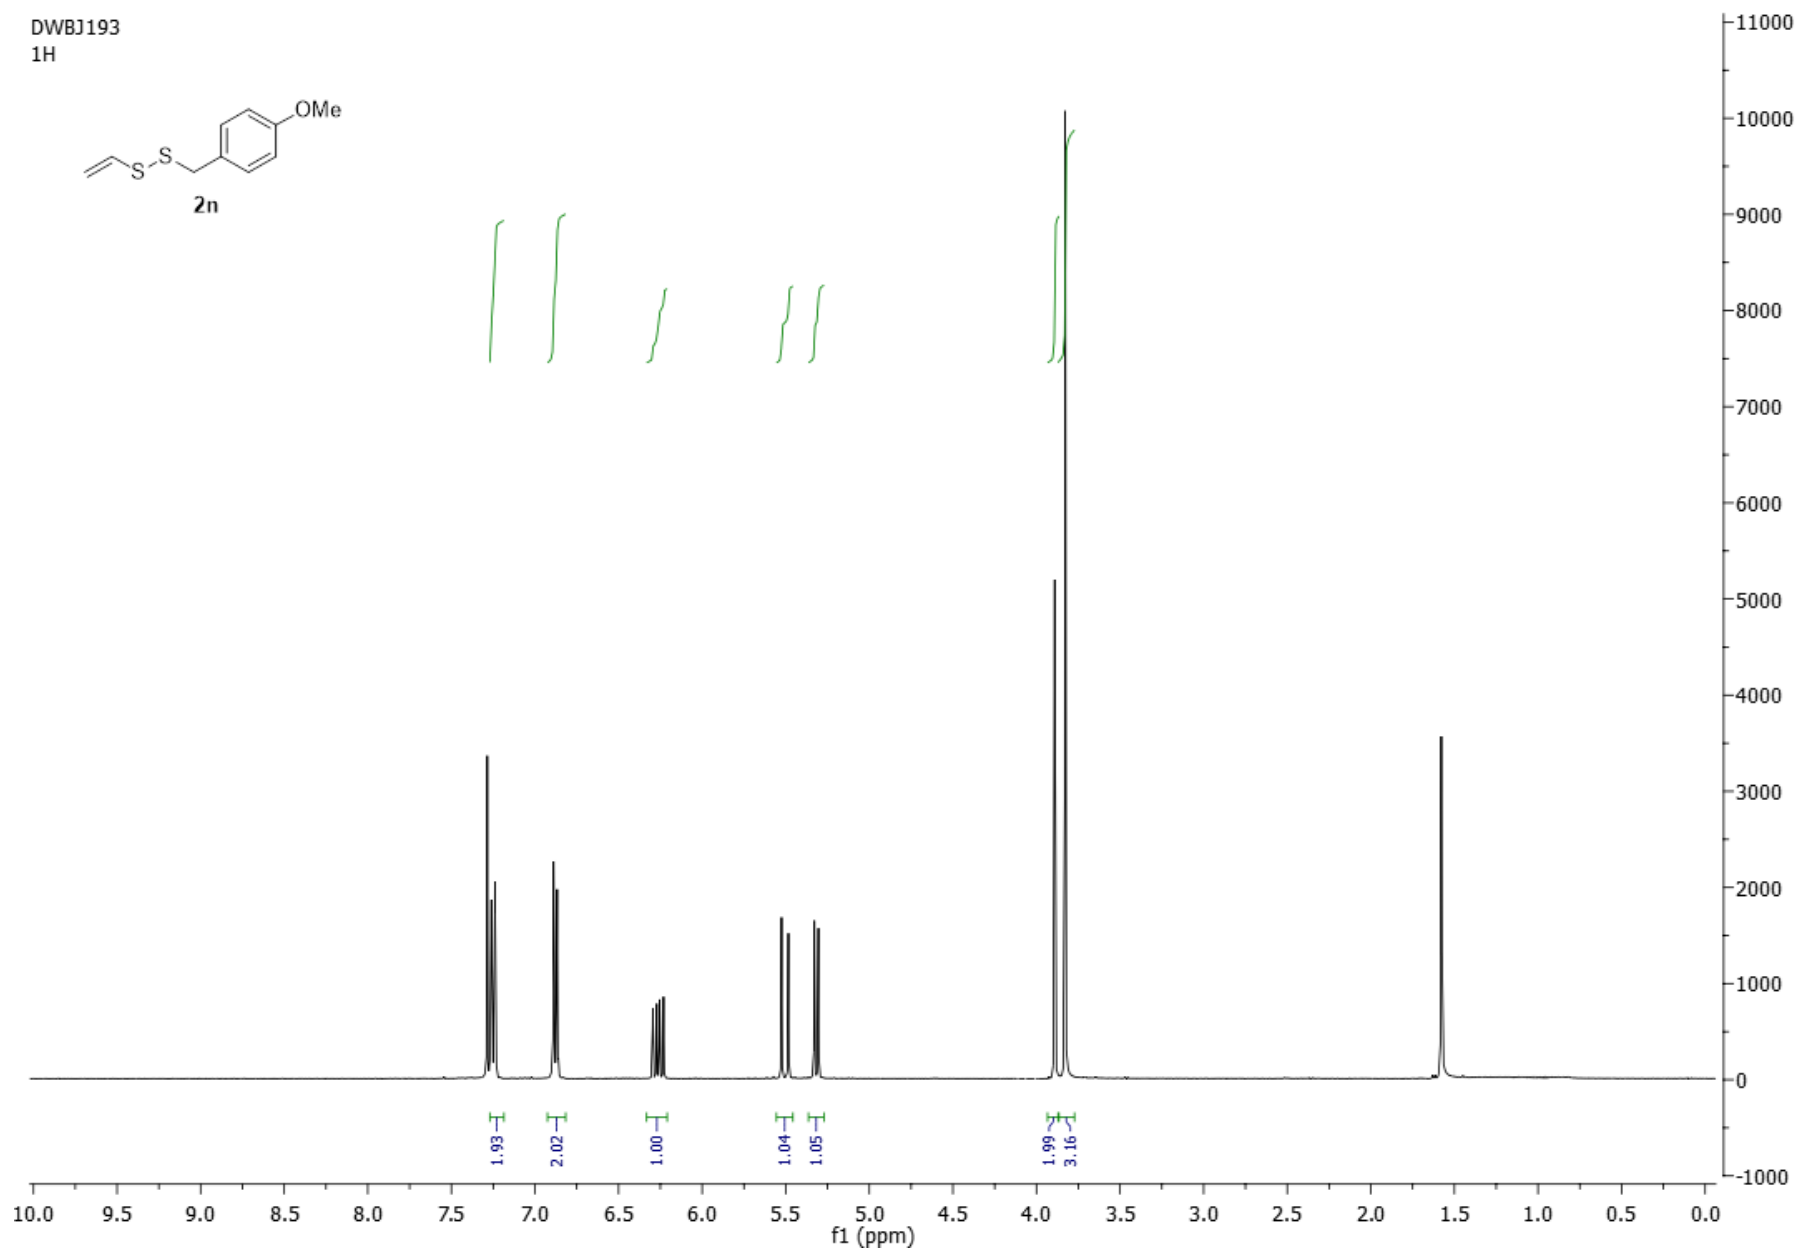

S60

DWBJ193  
13C

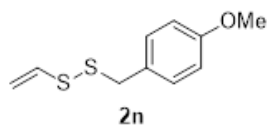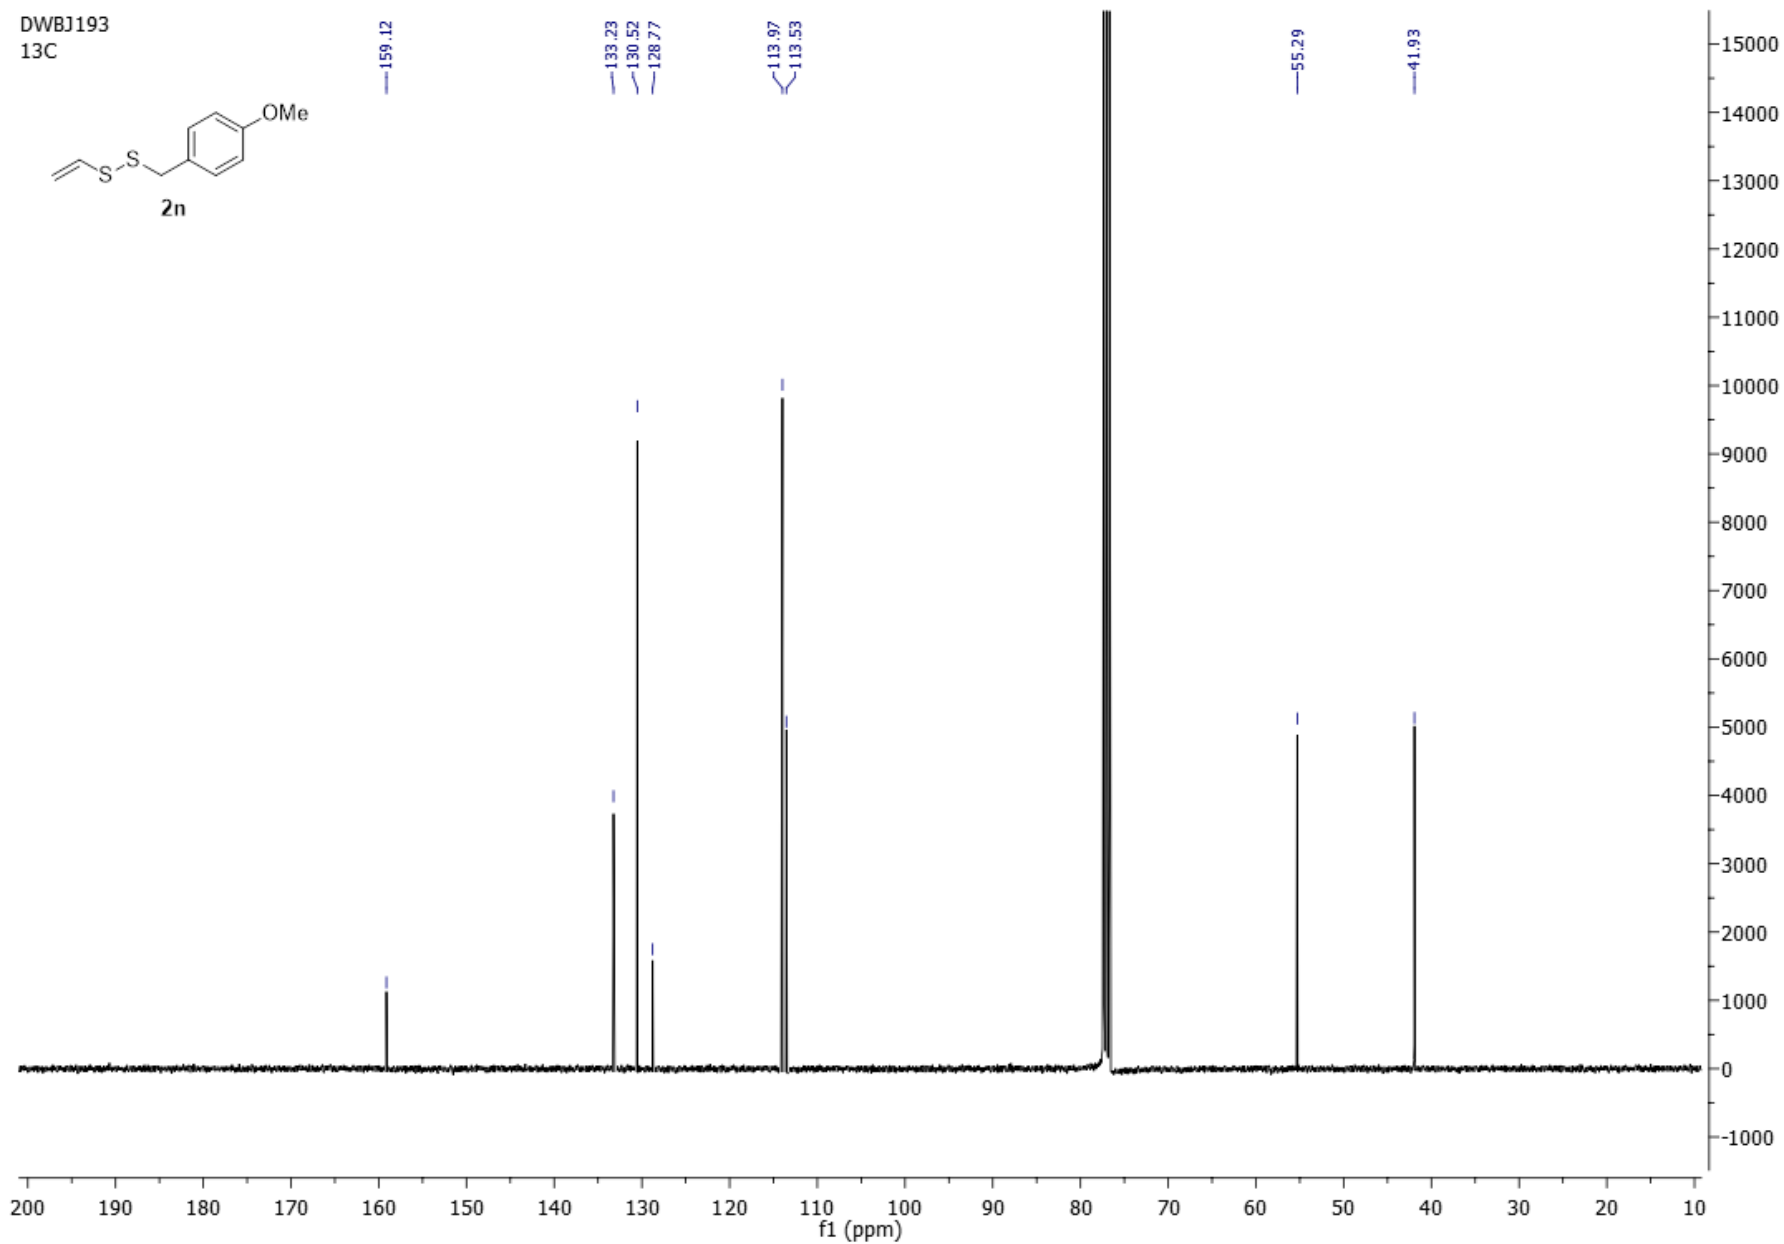

S61

DWBJ188  
1H

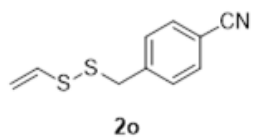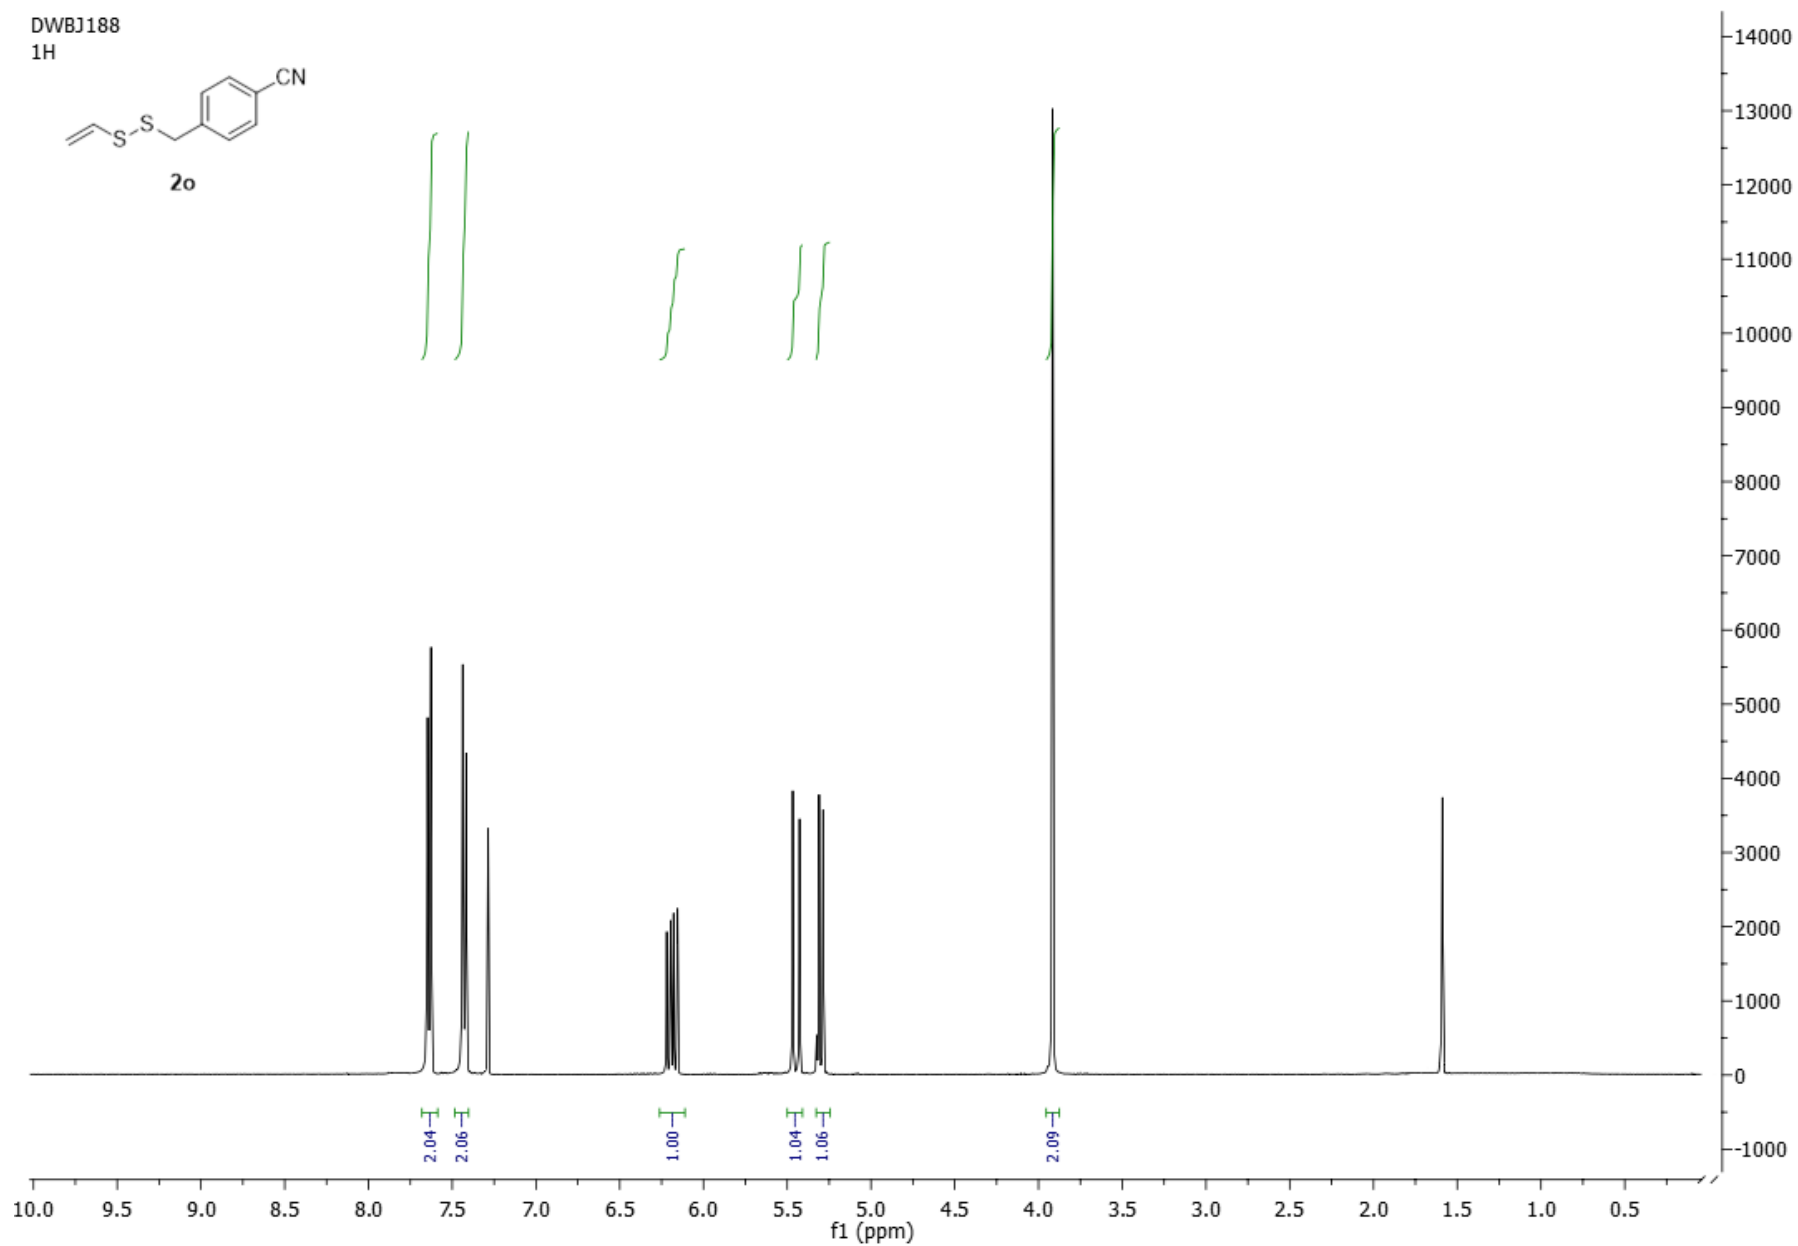

S62

DWBJ188  
13C{1H}

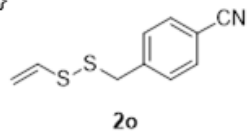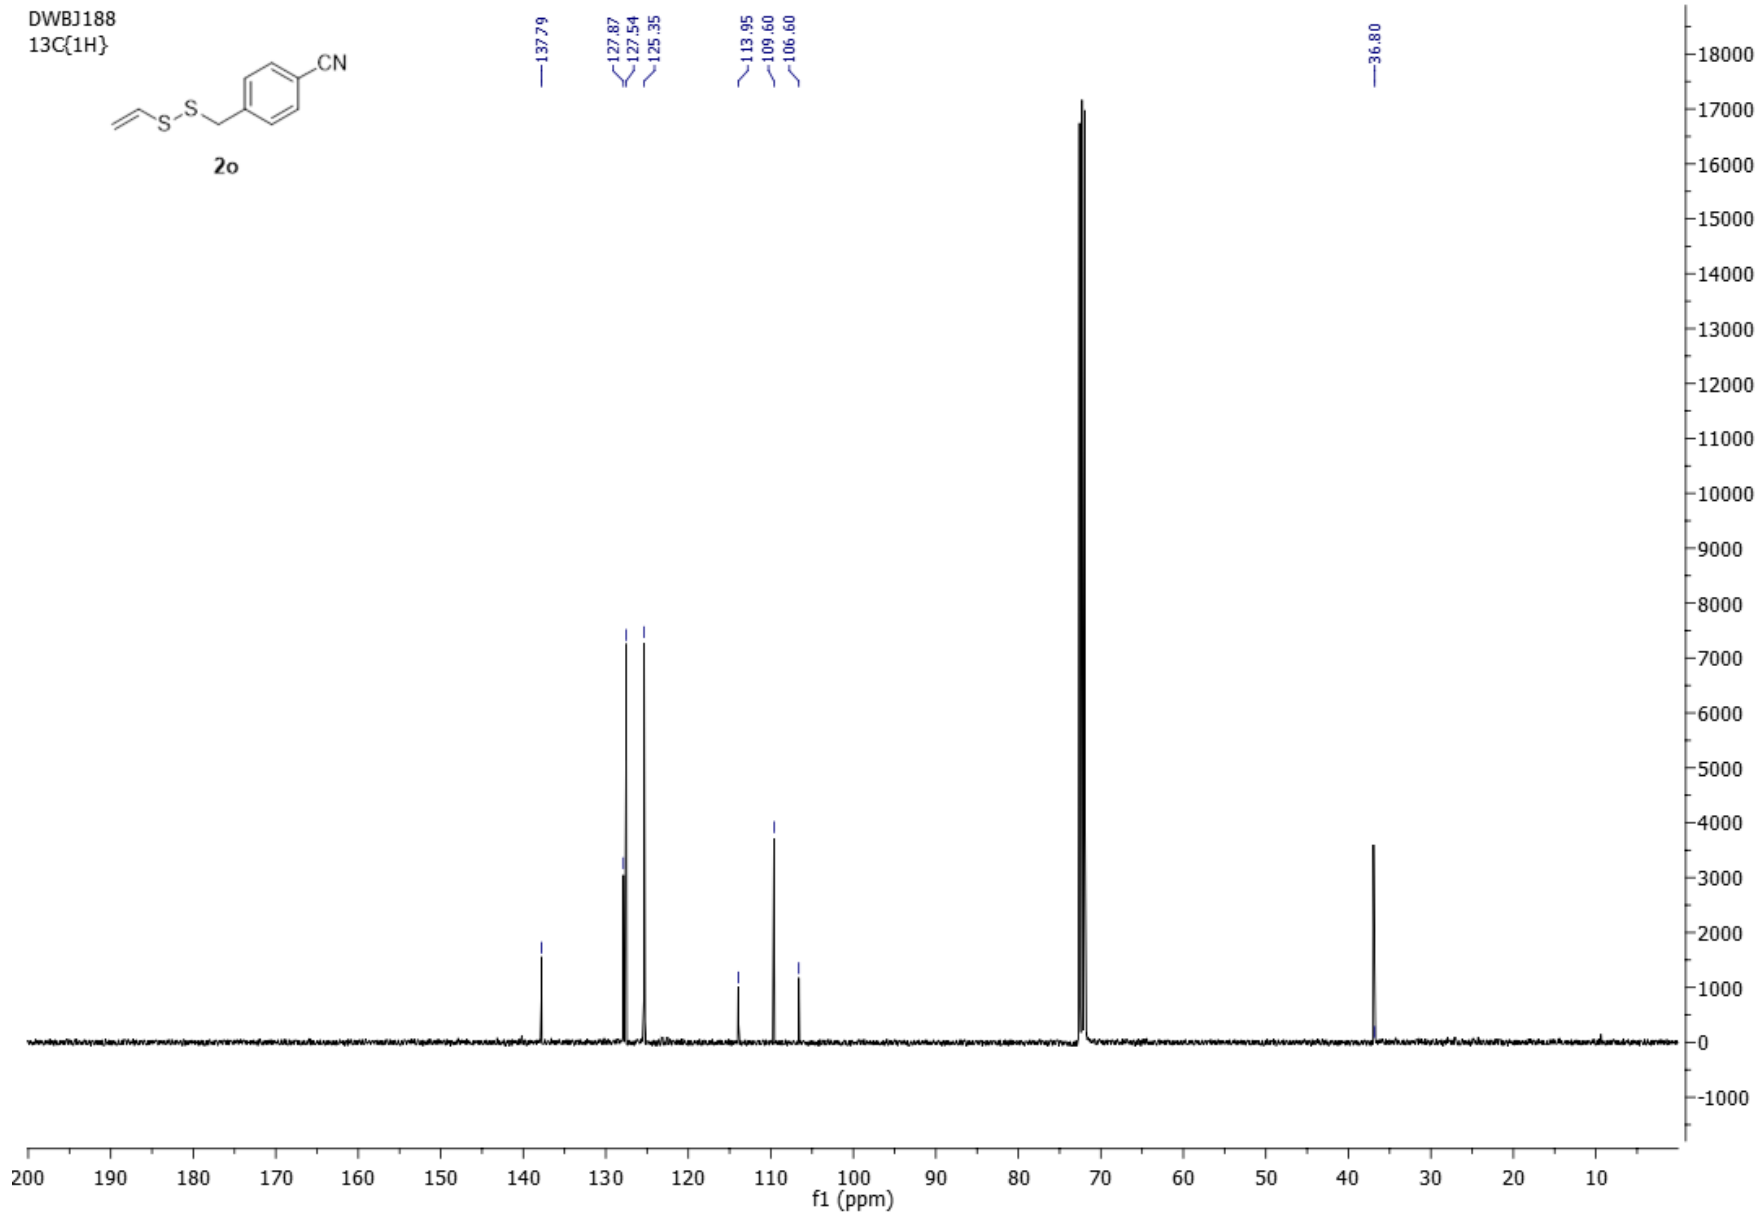

DWBJ224  
1H

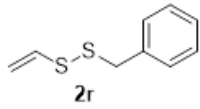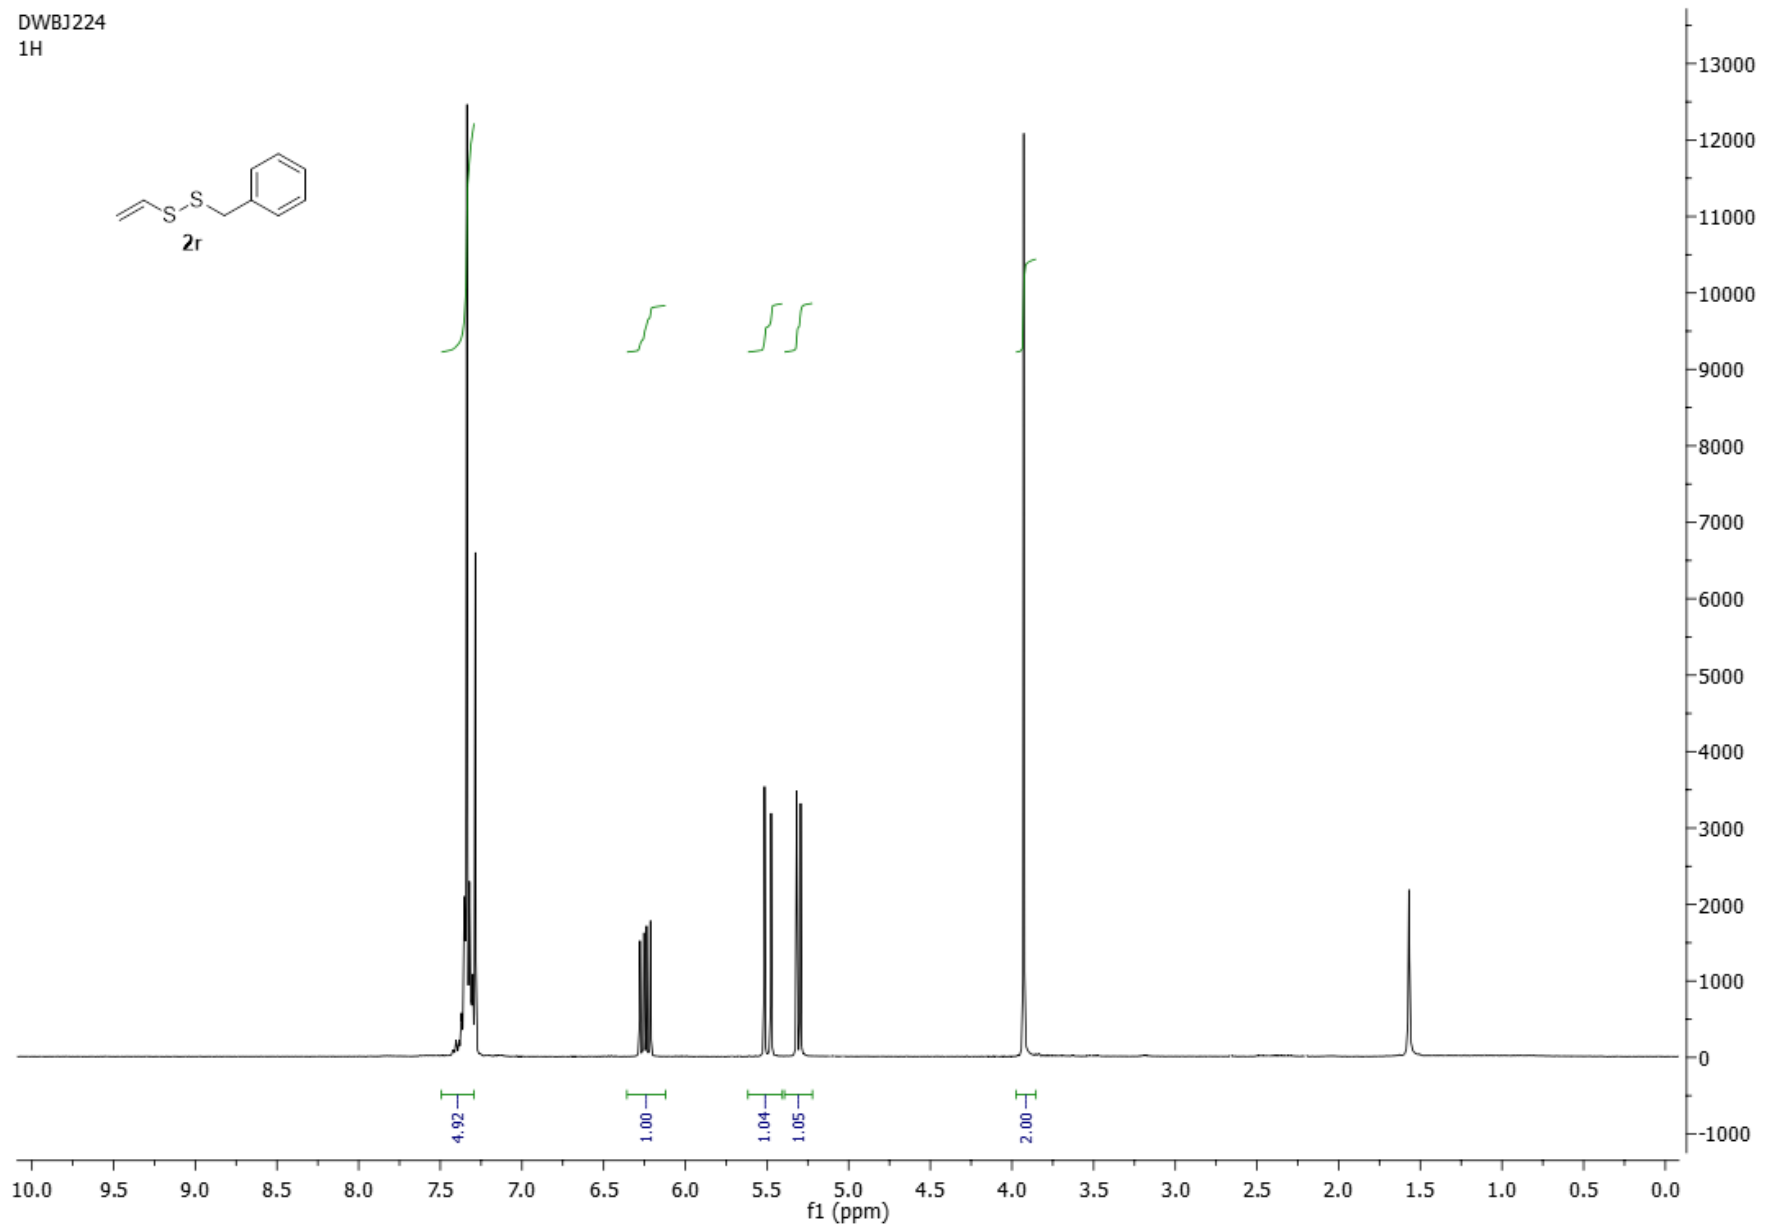

S64



DWBJ22413C  
13C{1H}

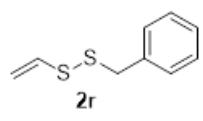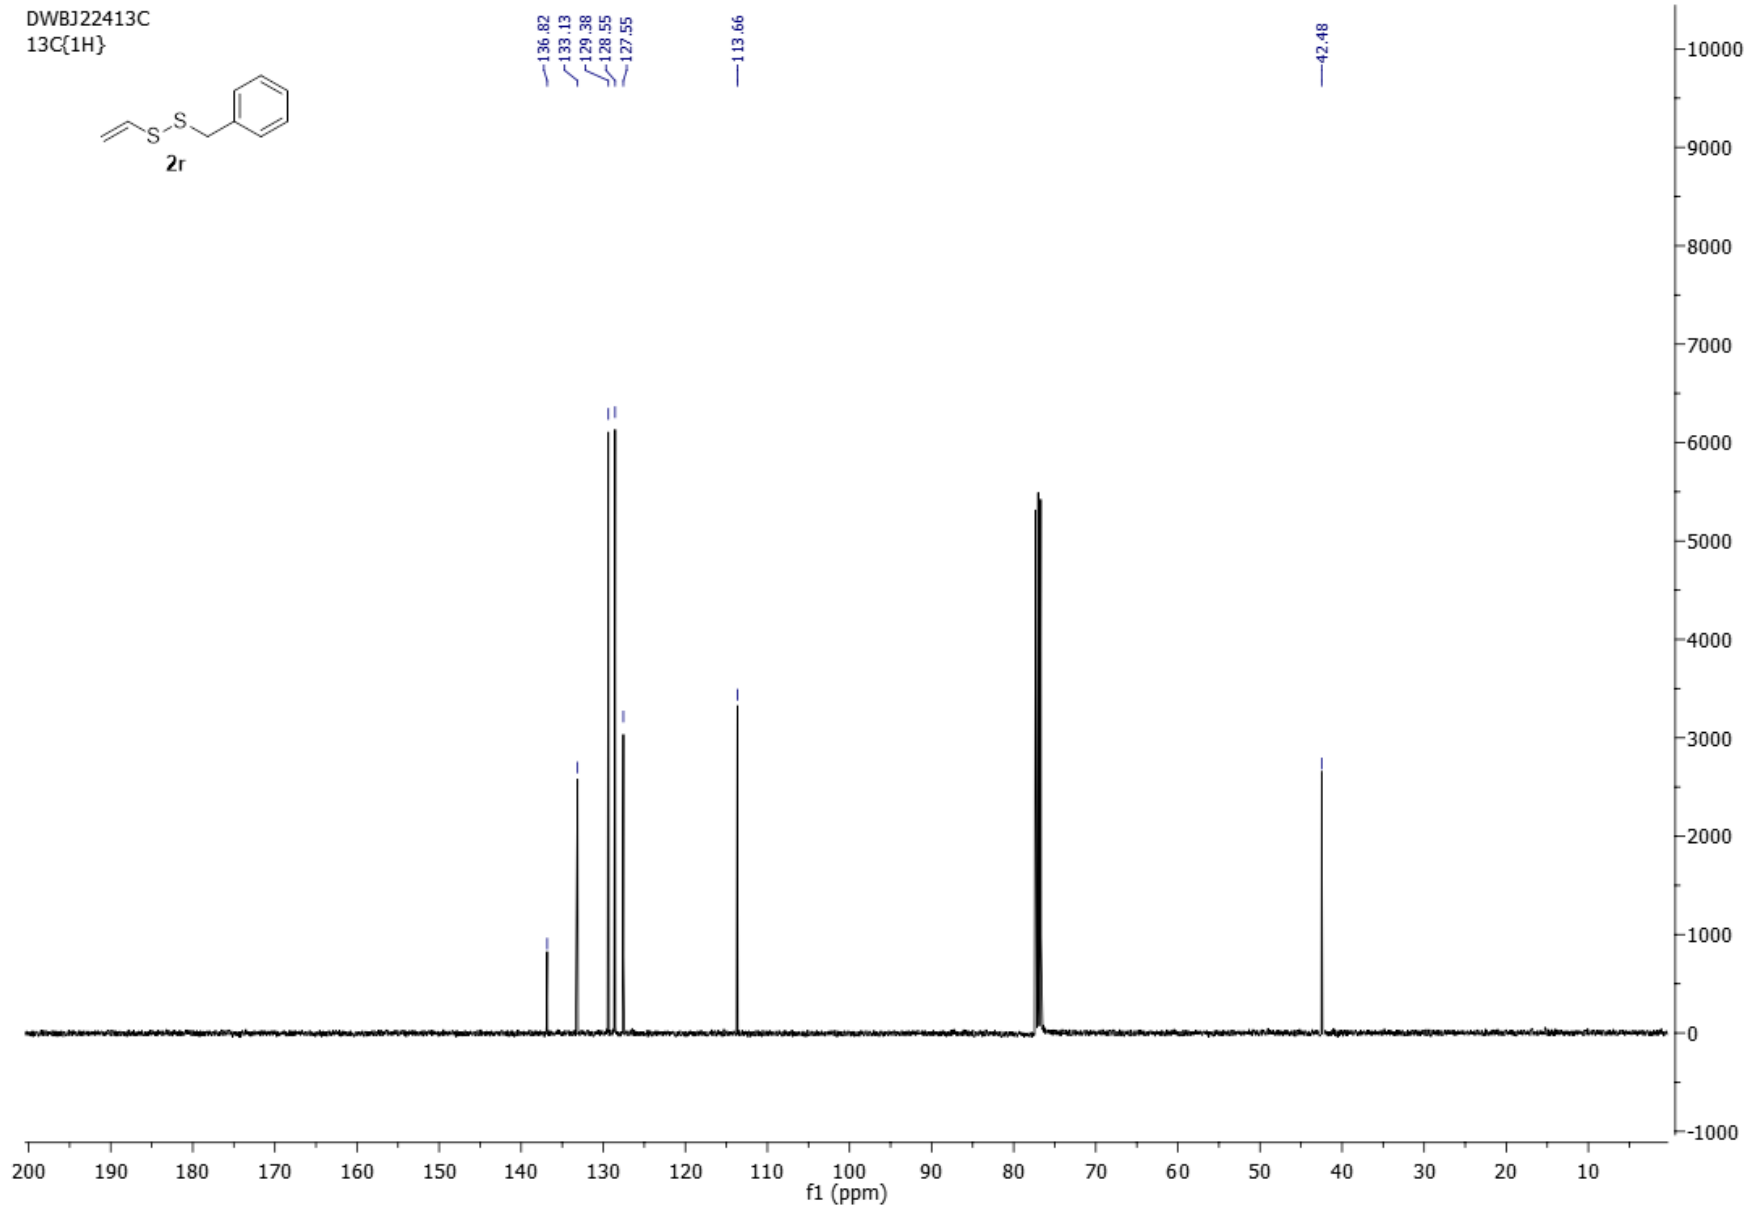

DWBJ191F1  
1H

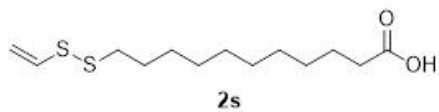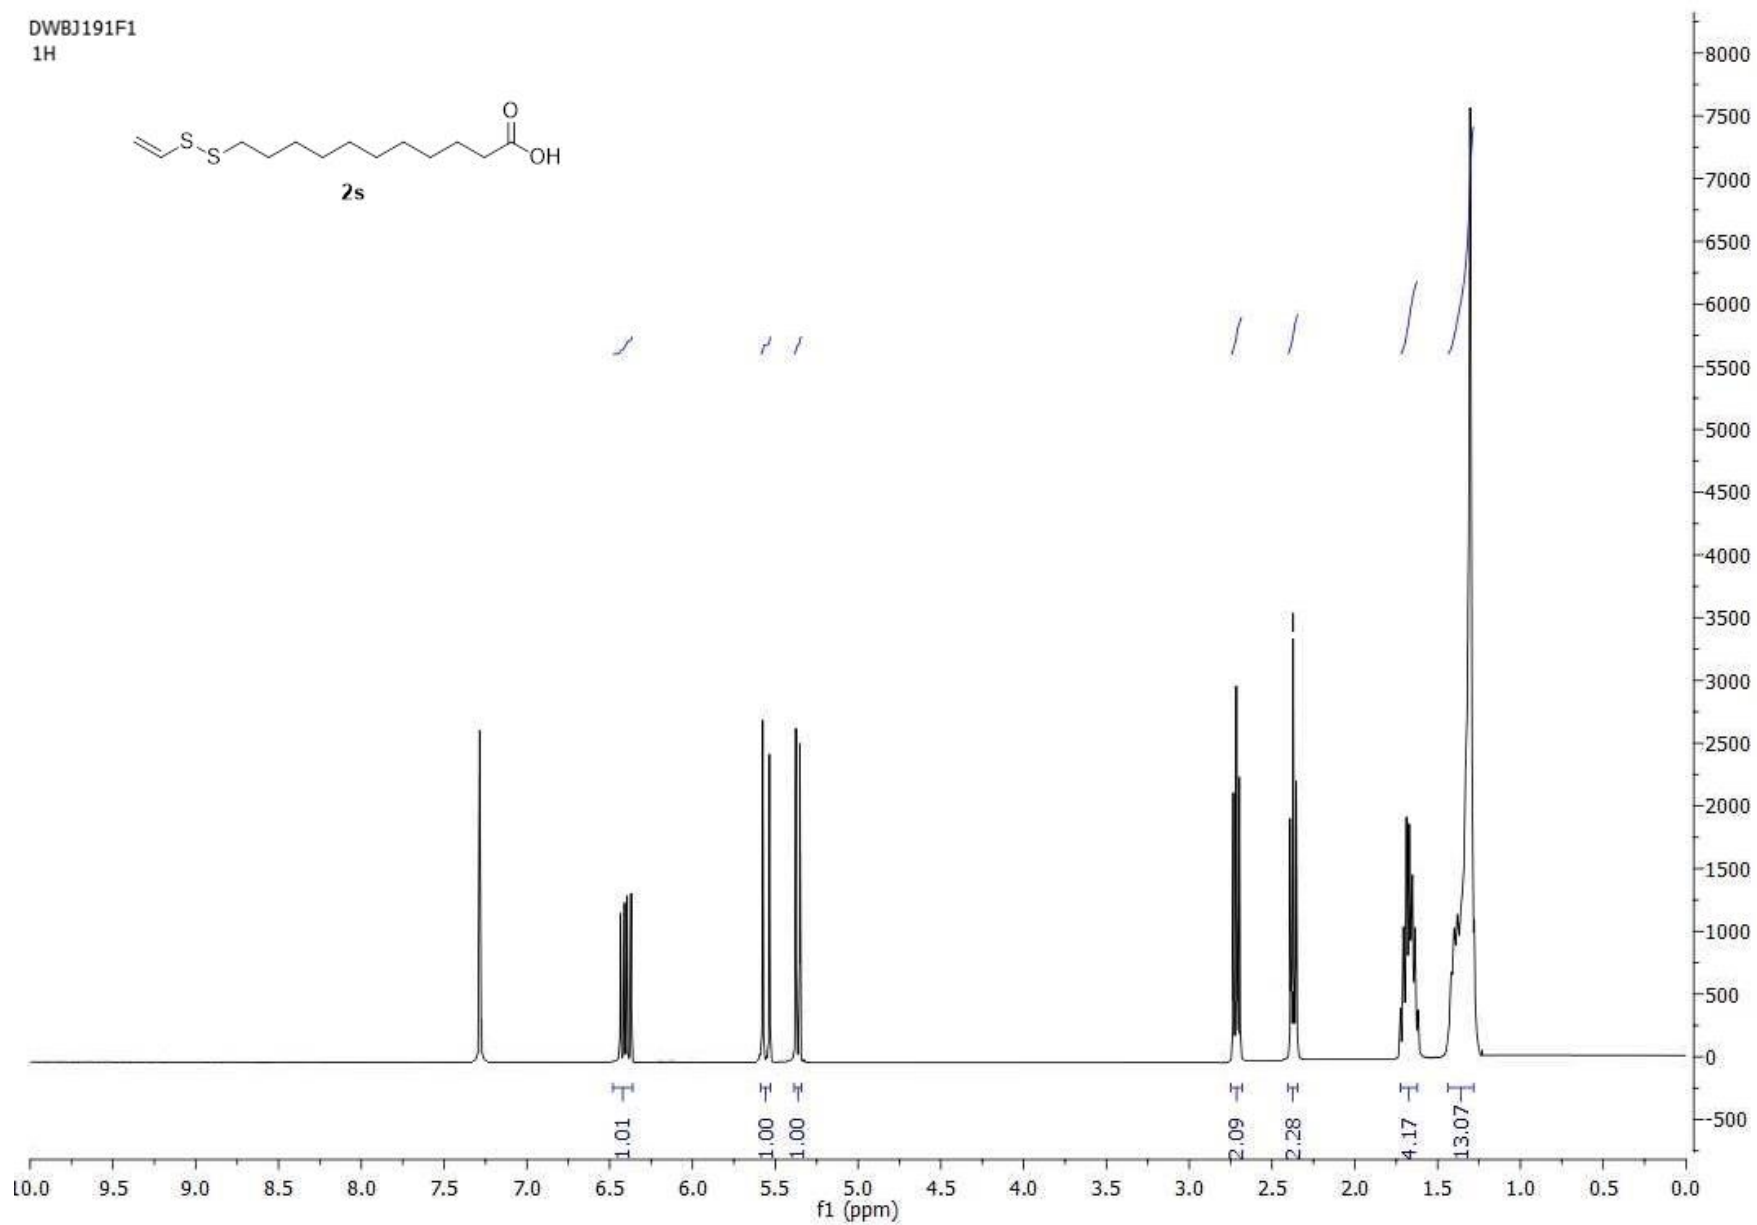

DWBJ191F1  
13C

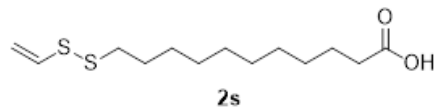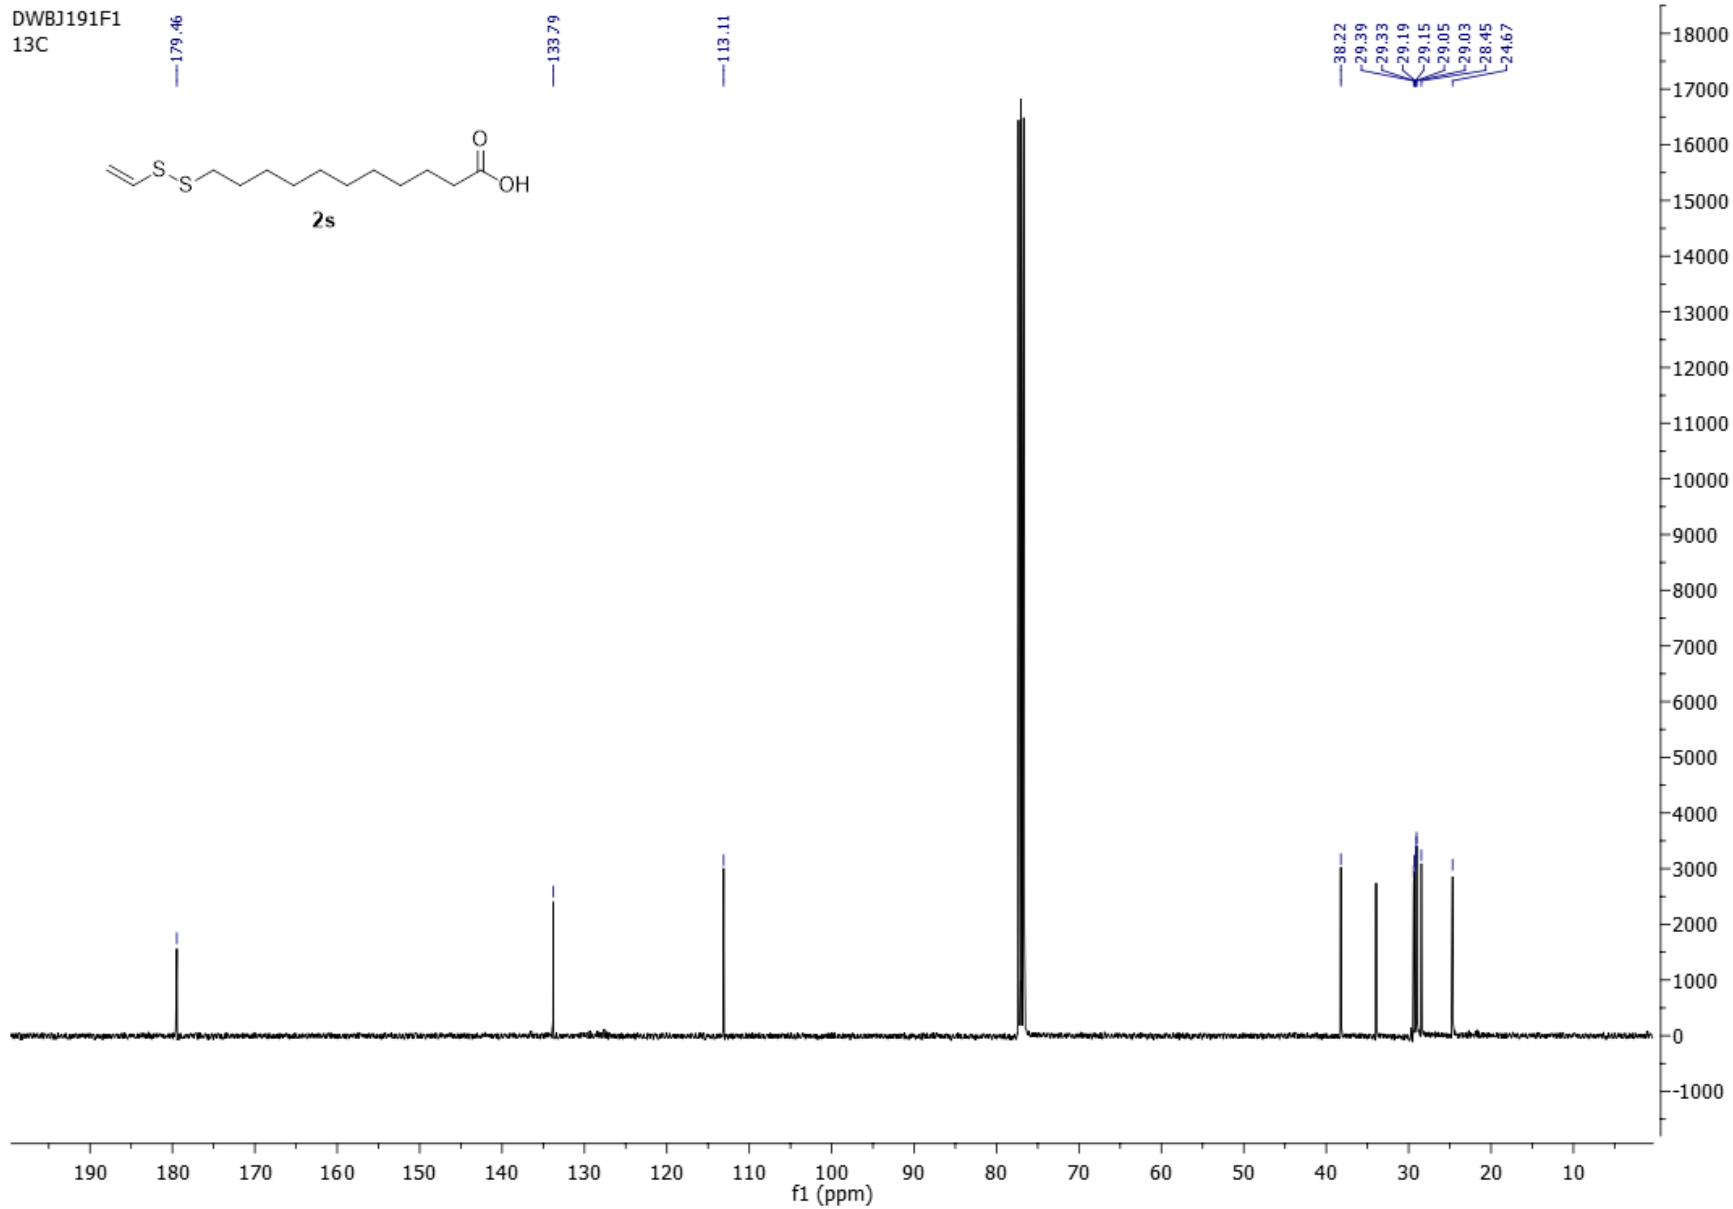

DWB1190  
1H

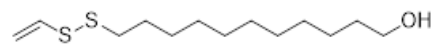

2t

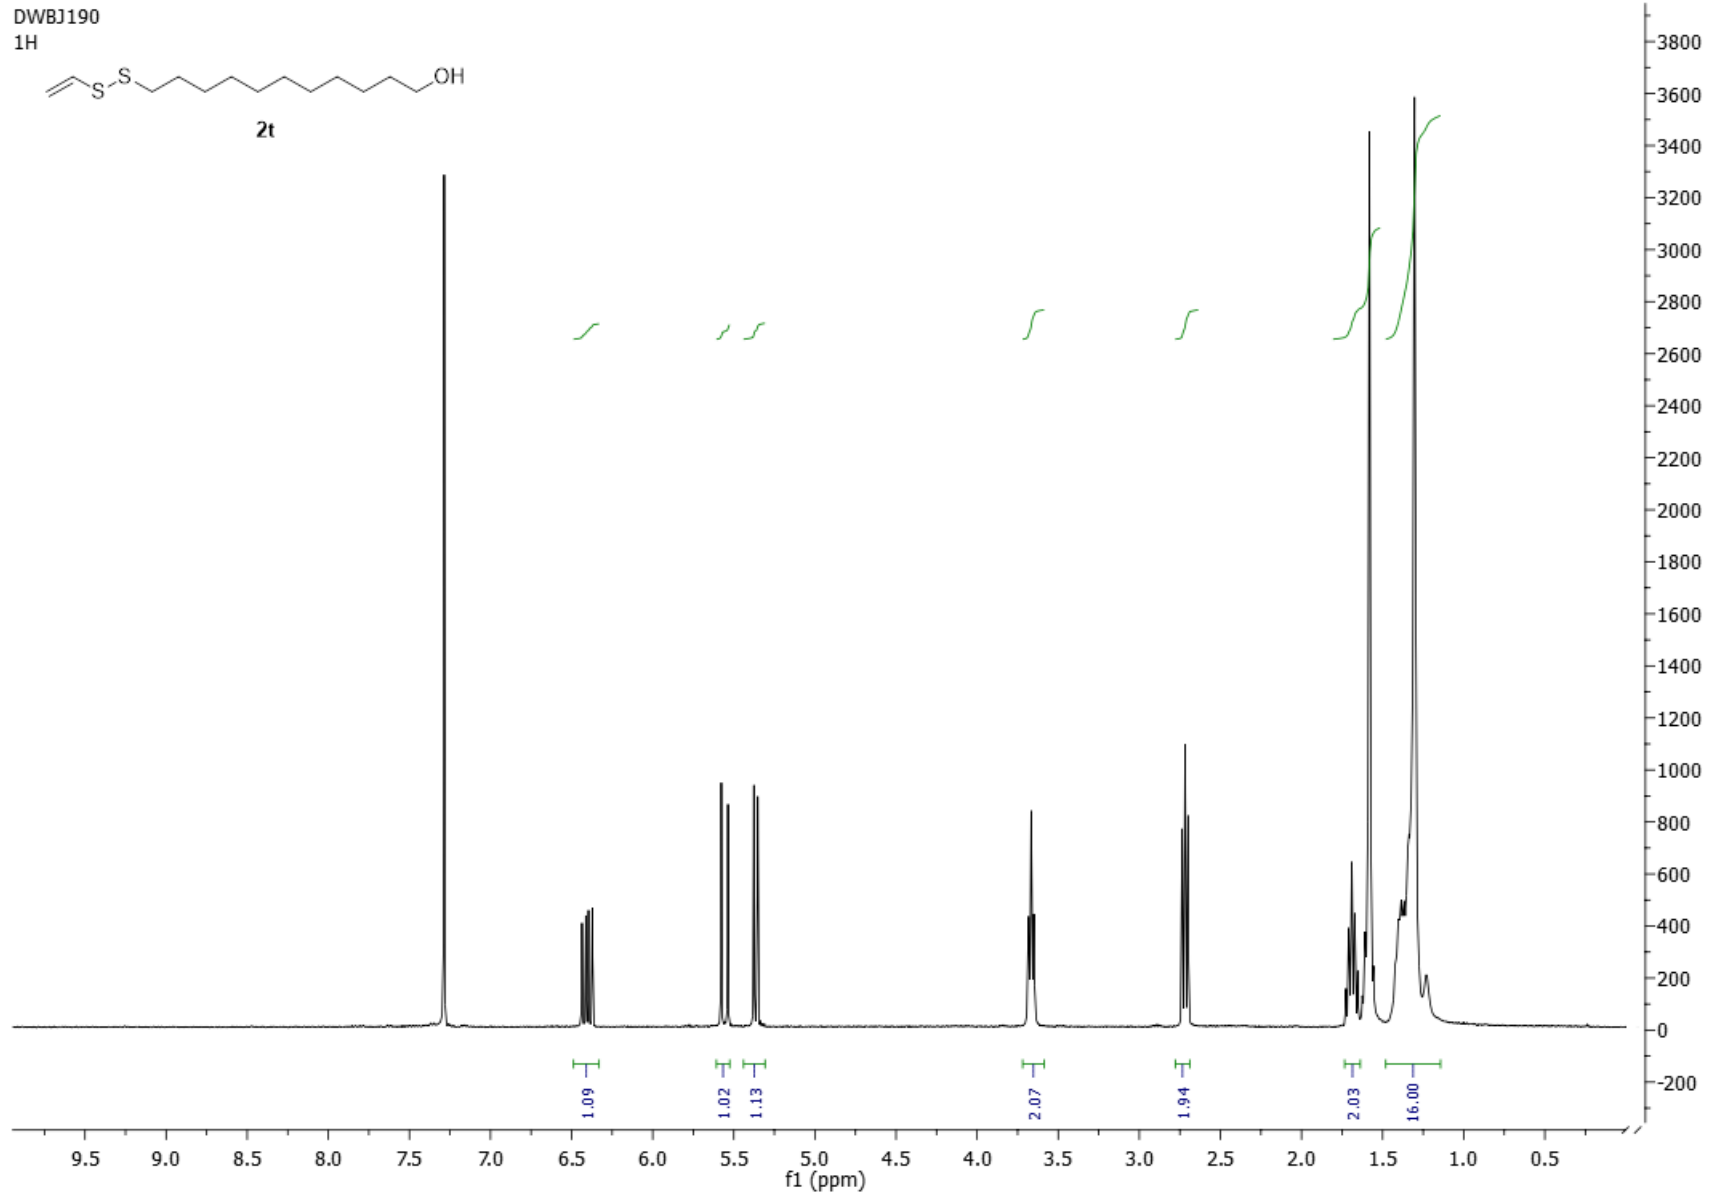

DWBJ190  
13C

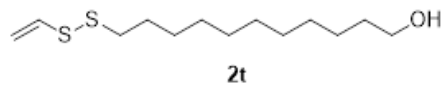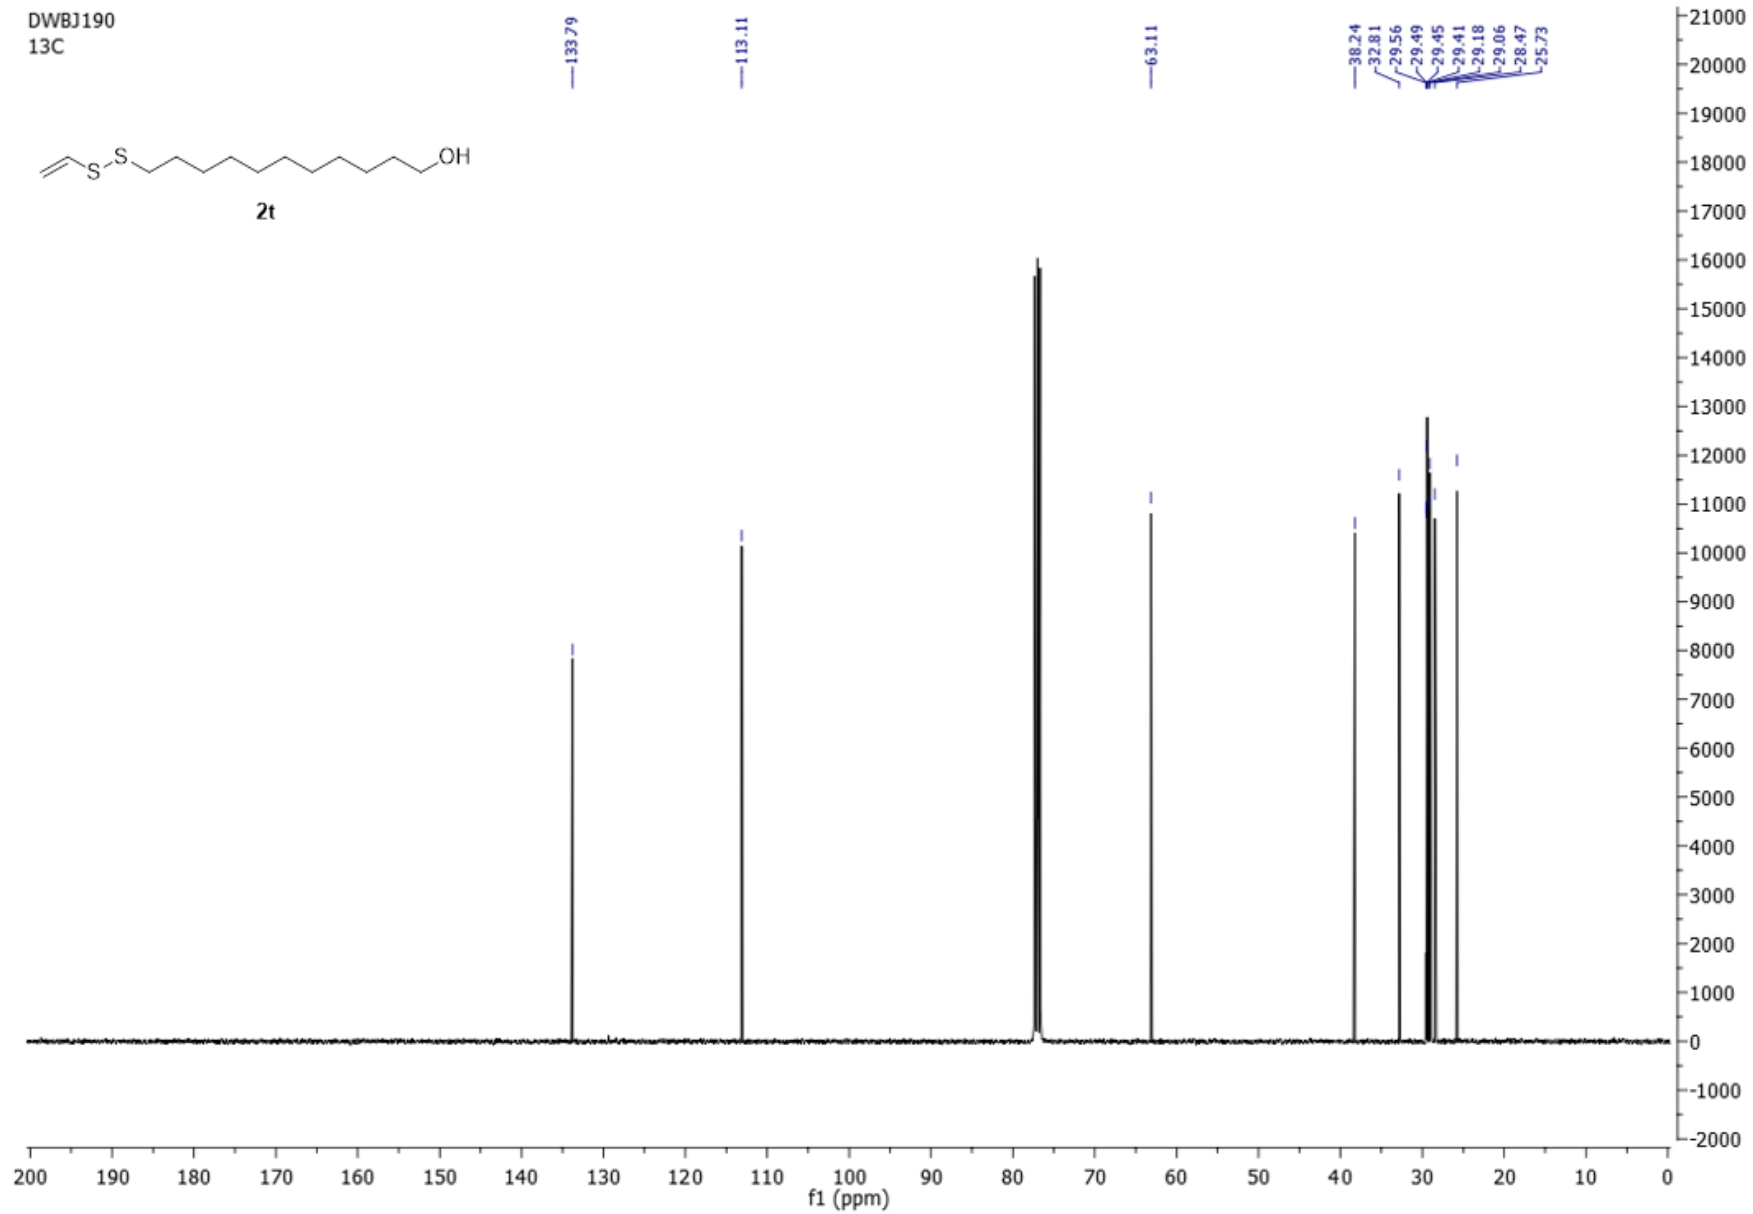

DWBJ209  
1H

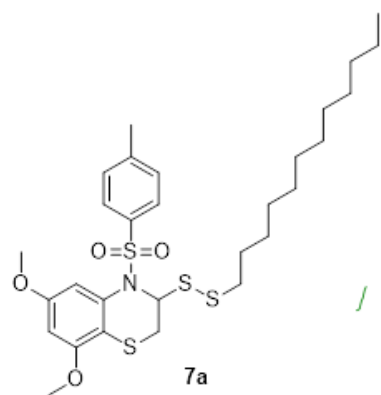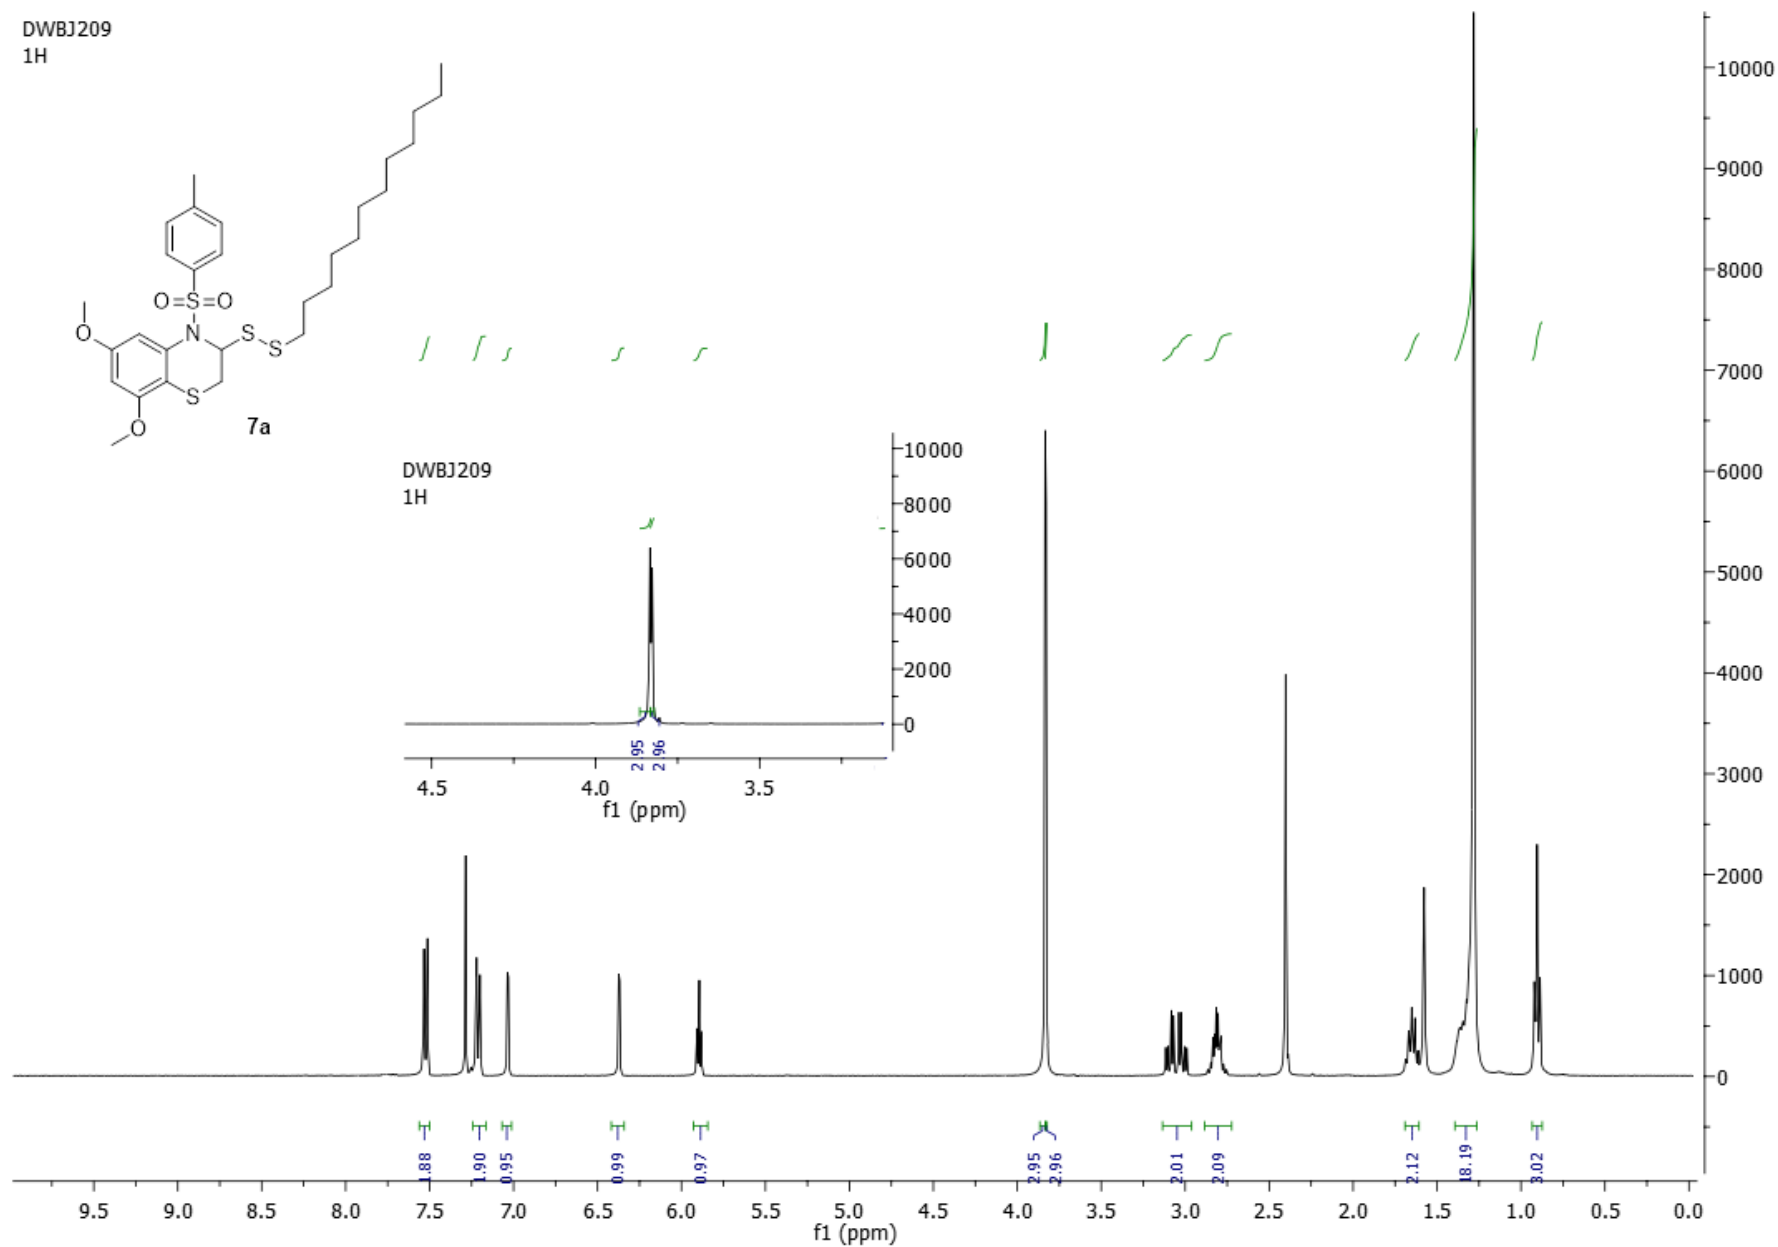

DWBJTZC12\_13C  
13C

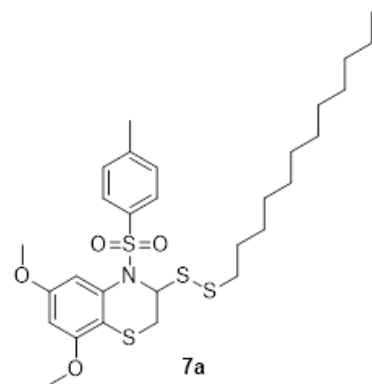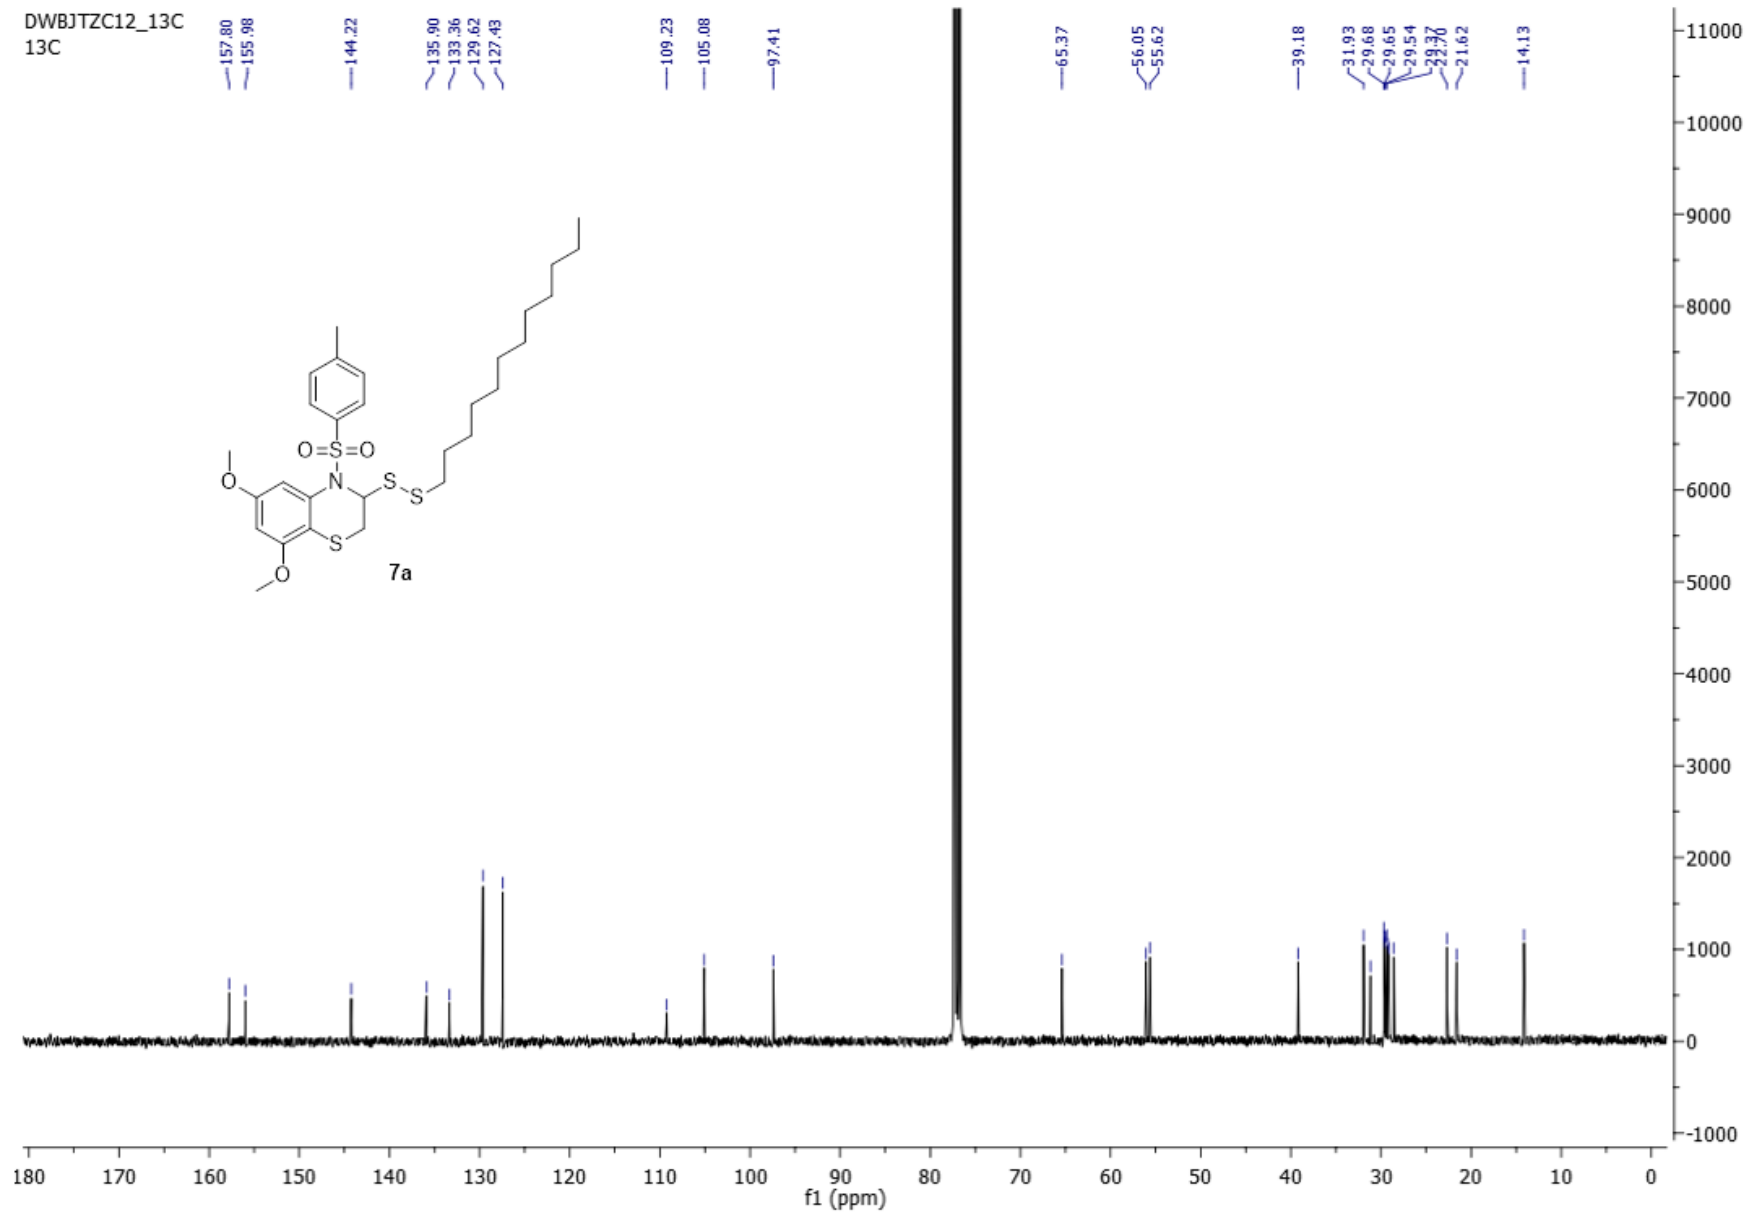

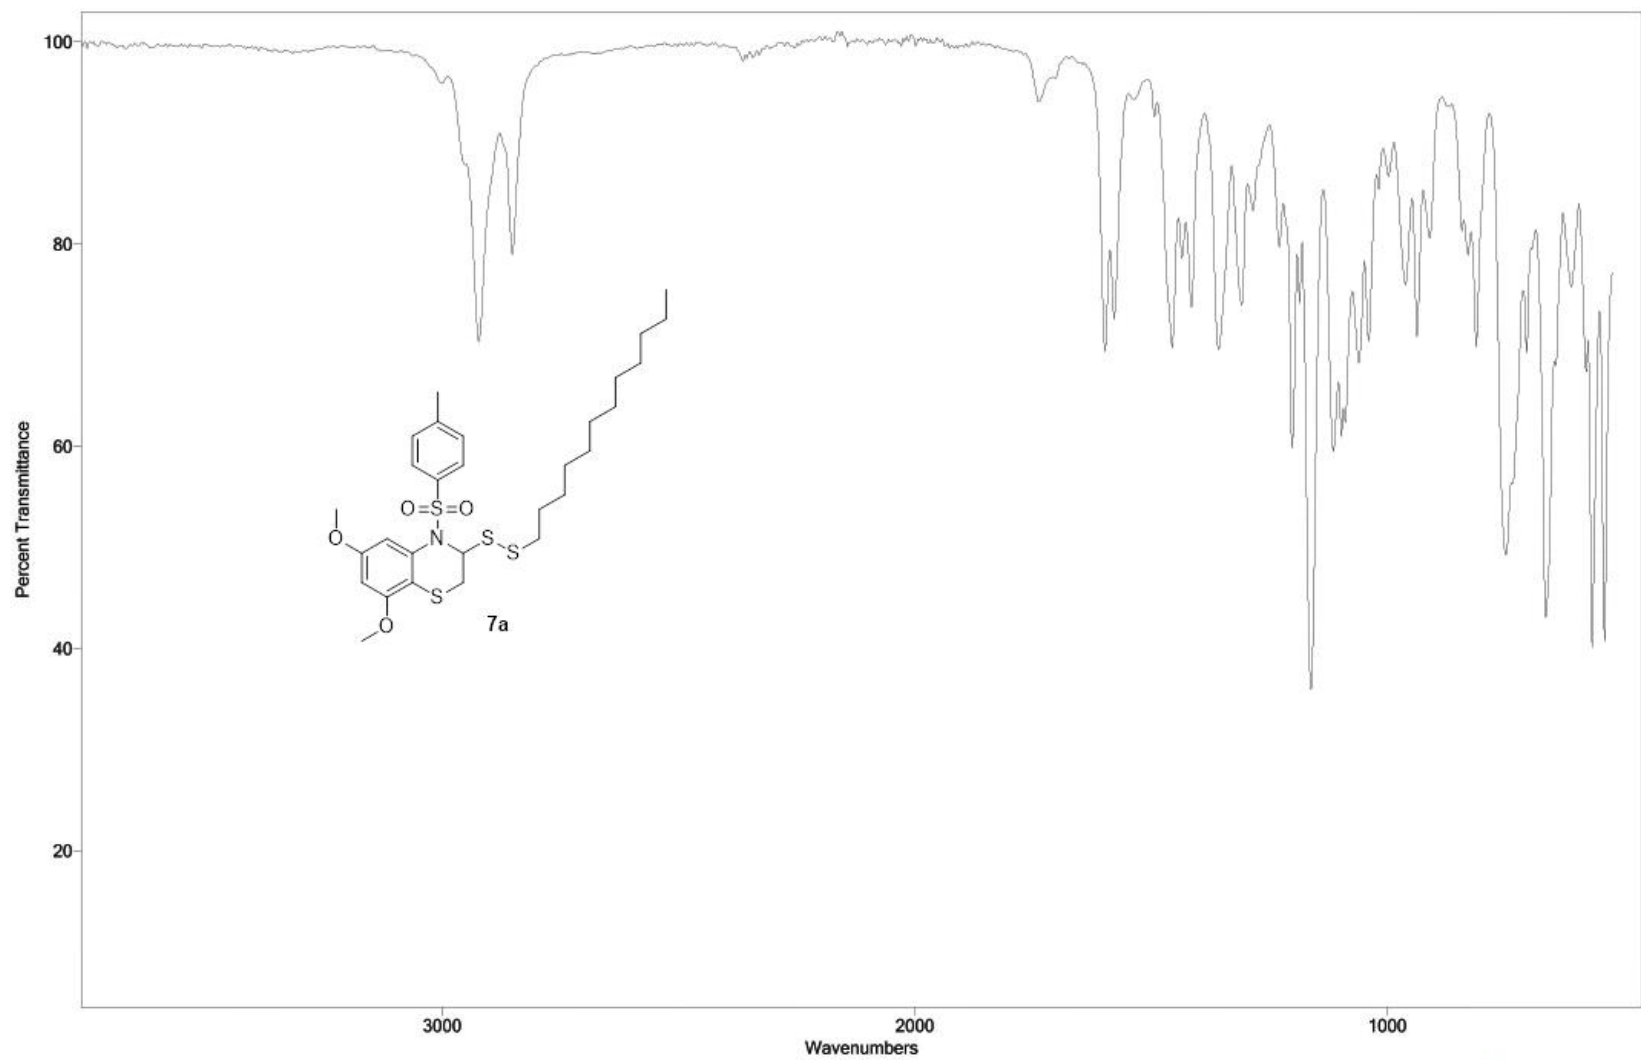

printed on 06/13/2020 14:22:25

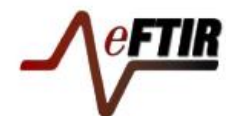



DWBJ222F2  
1H

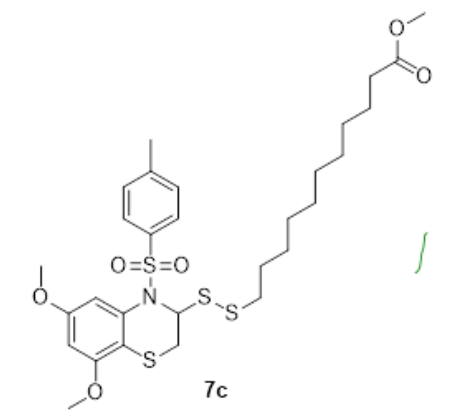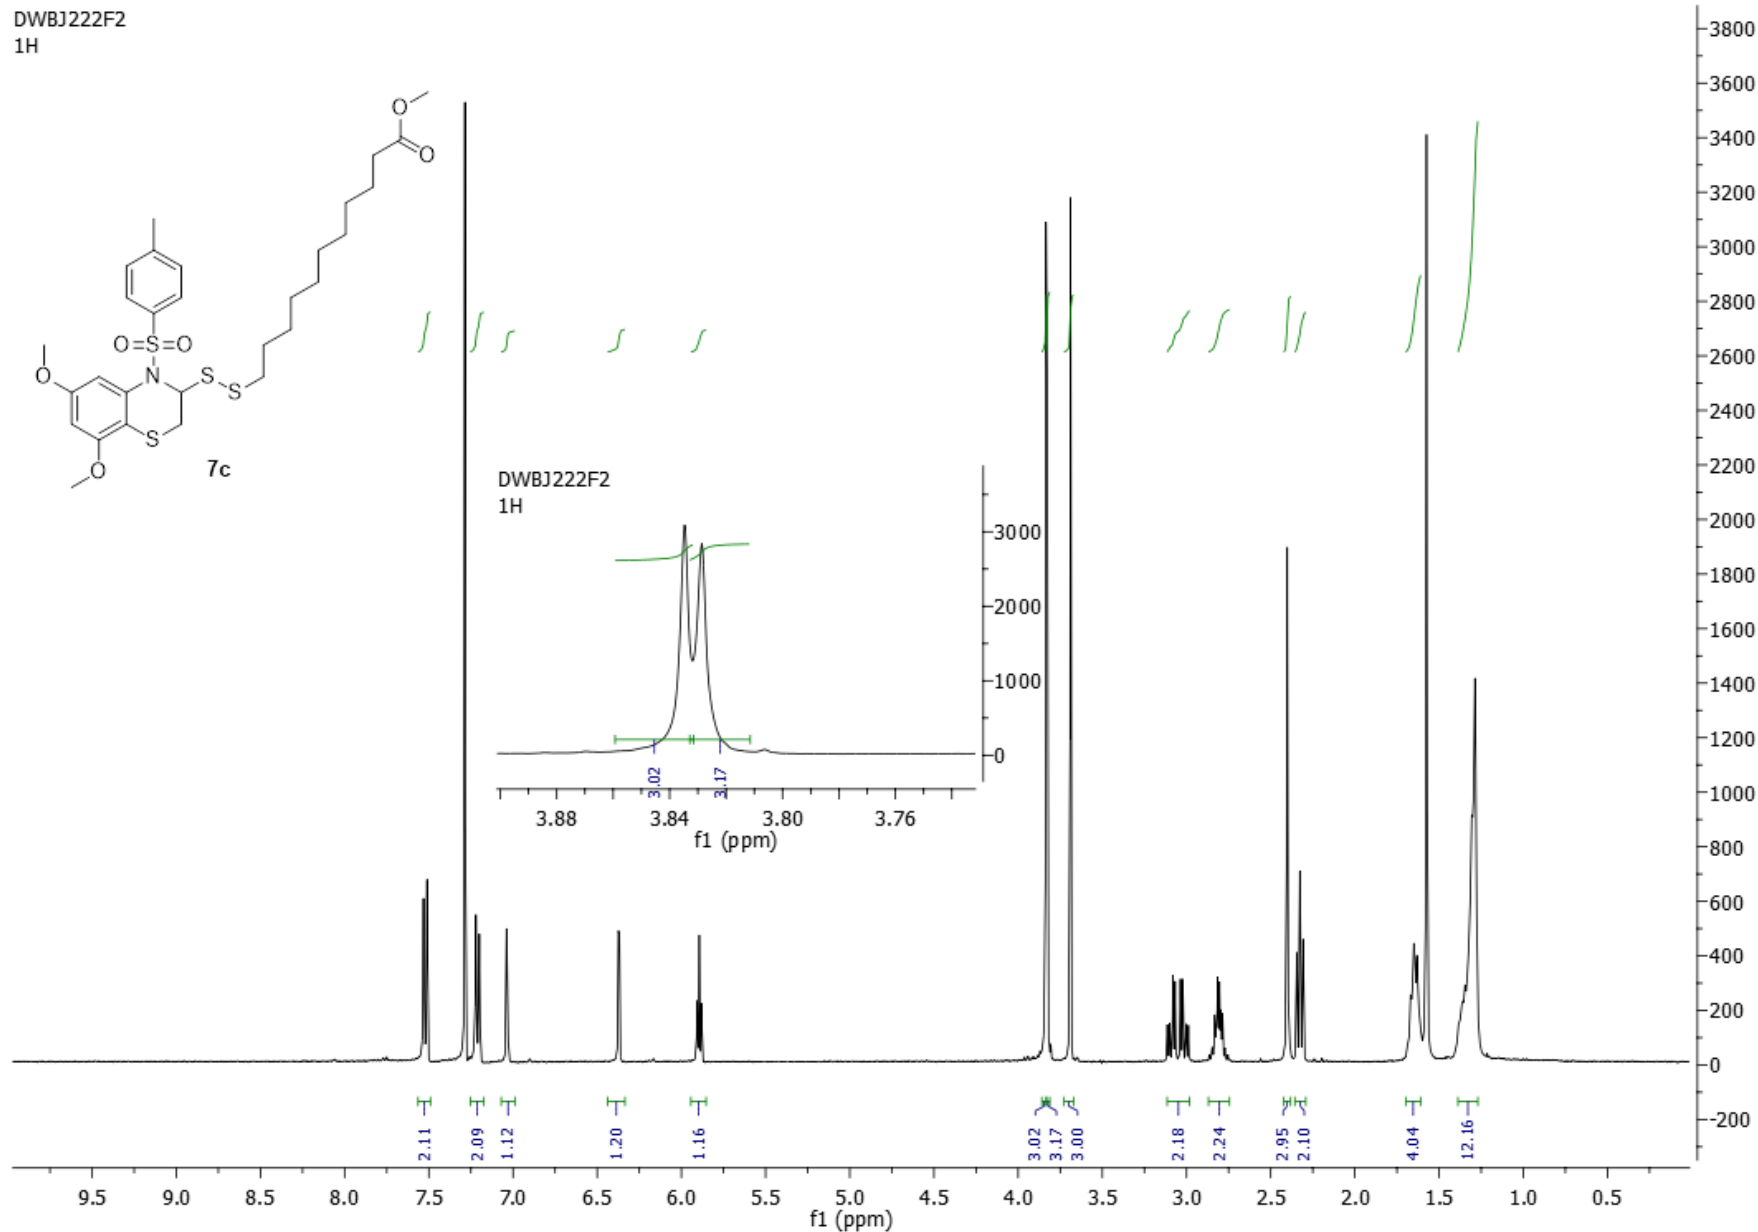

DWBJ222F213C  
13C{1H}

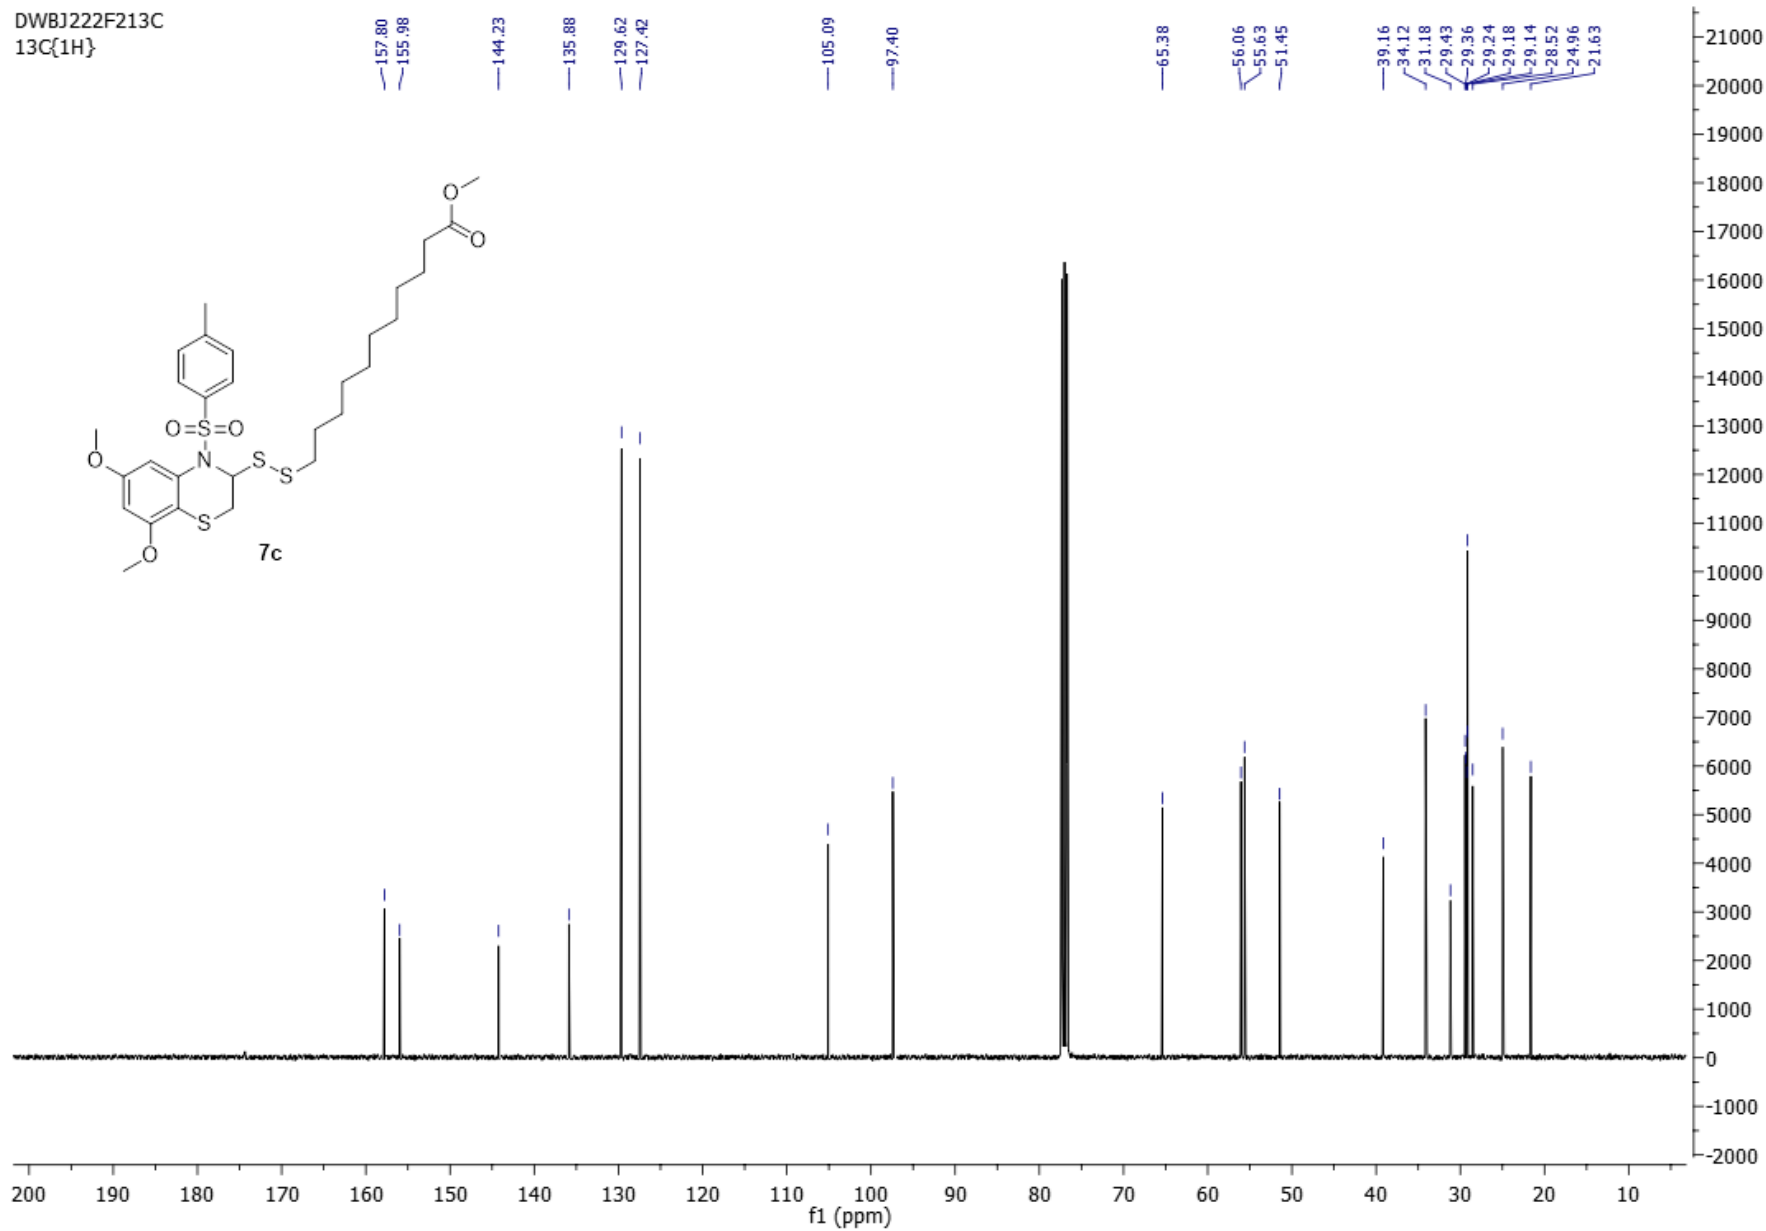

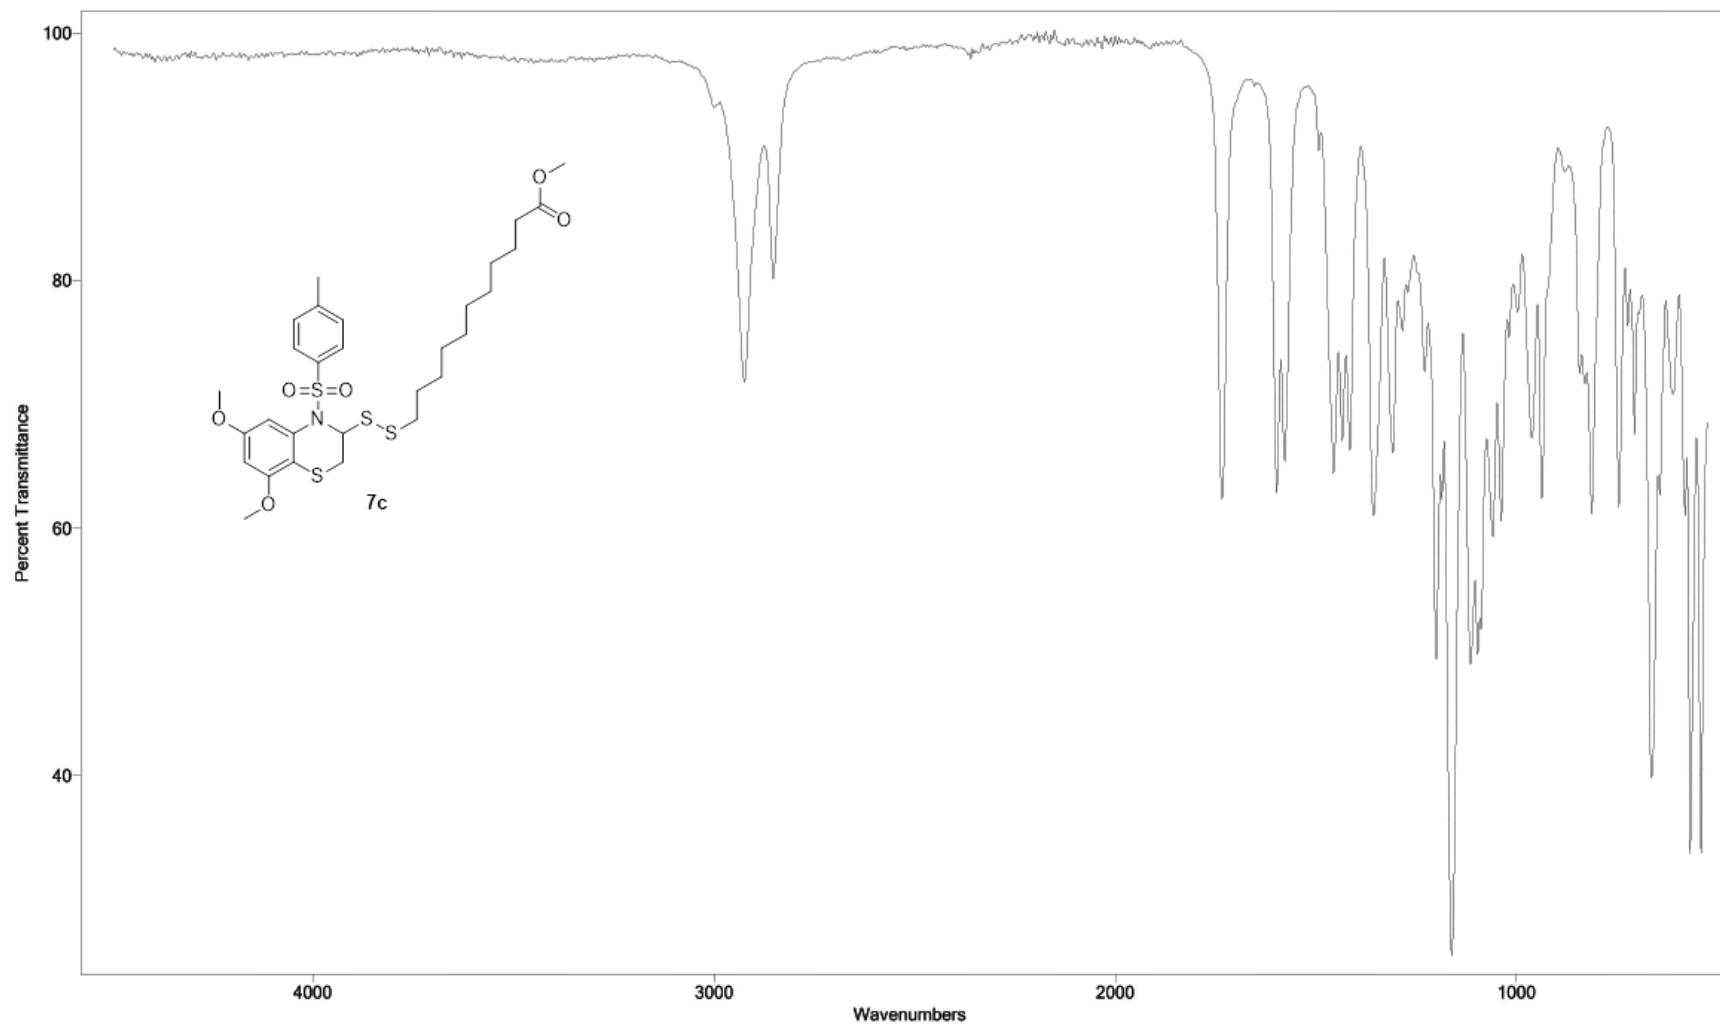

DWBJTZNO2  
1H

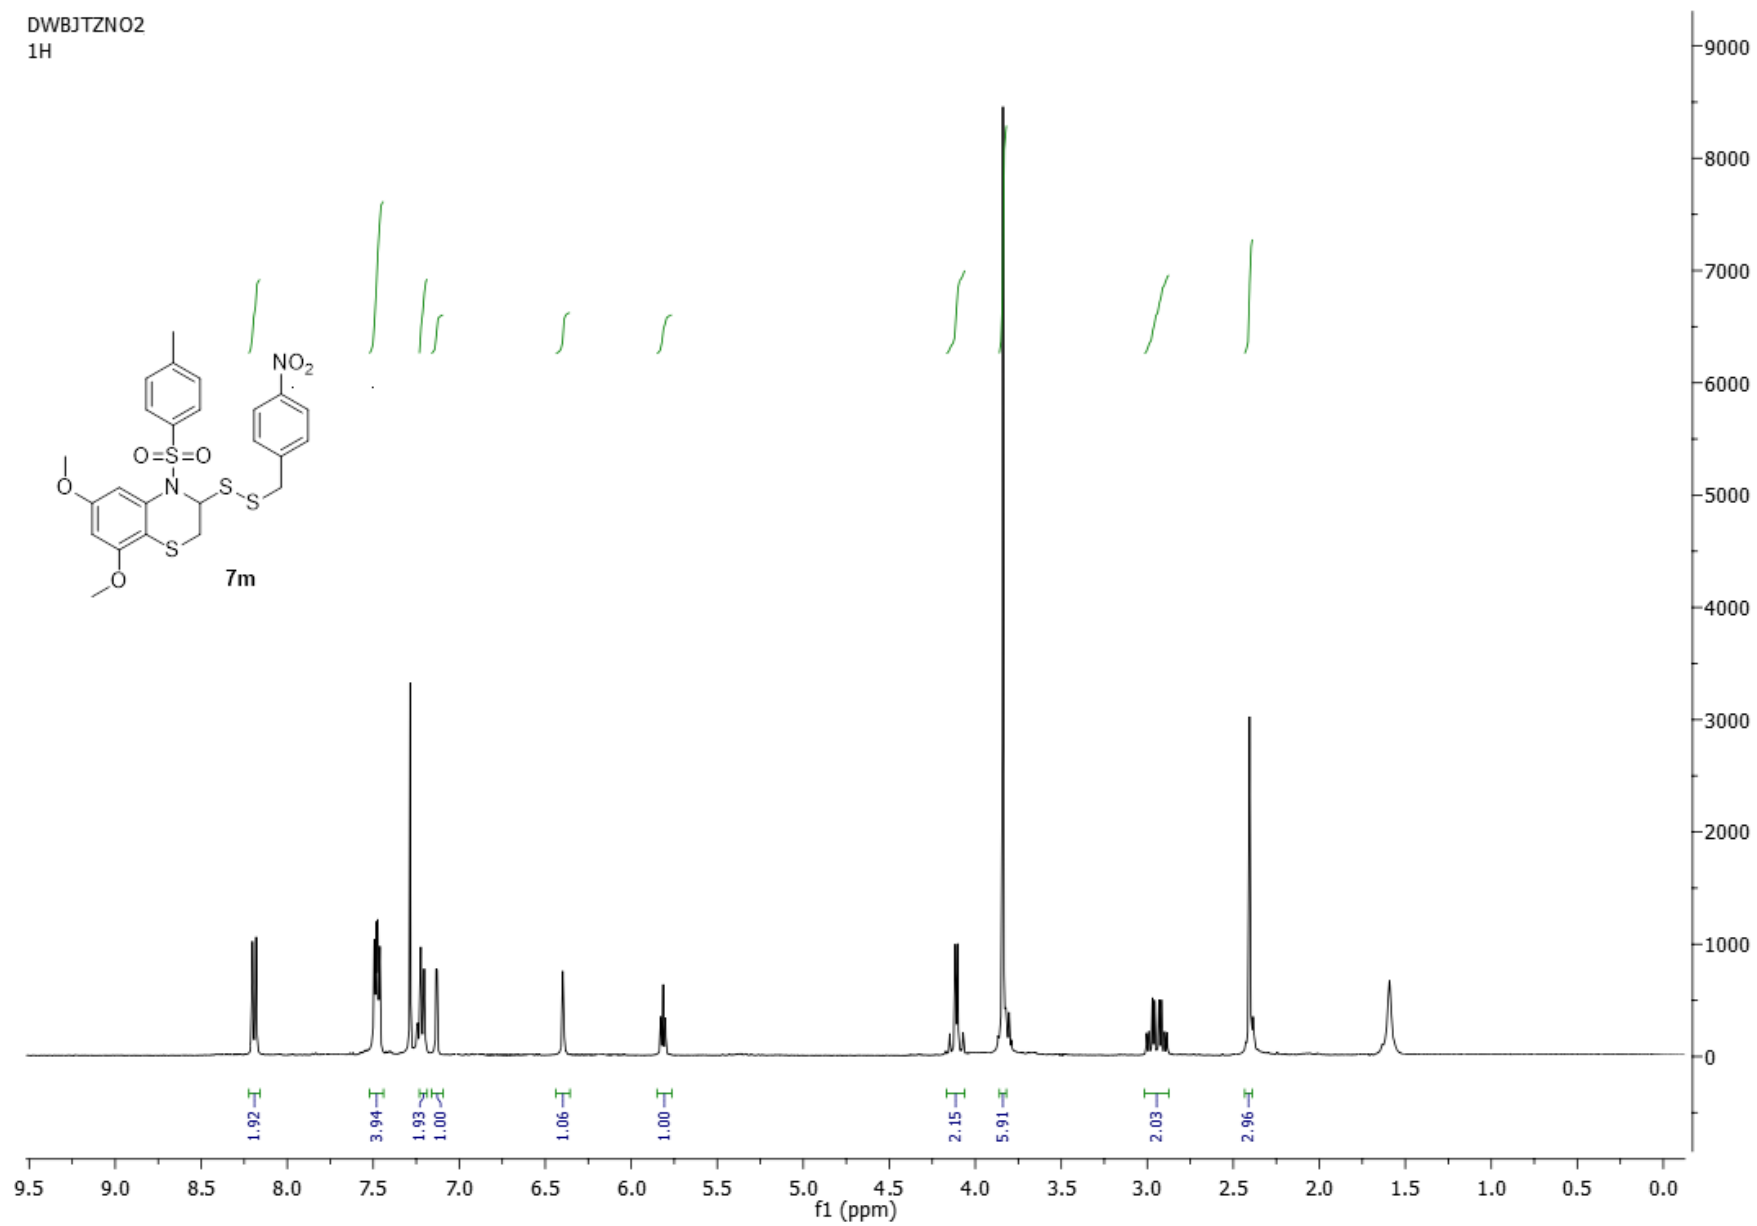

DWBJTZO2\_13C  
13C

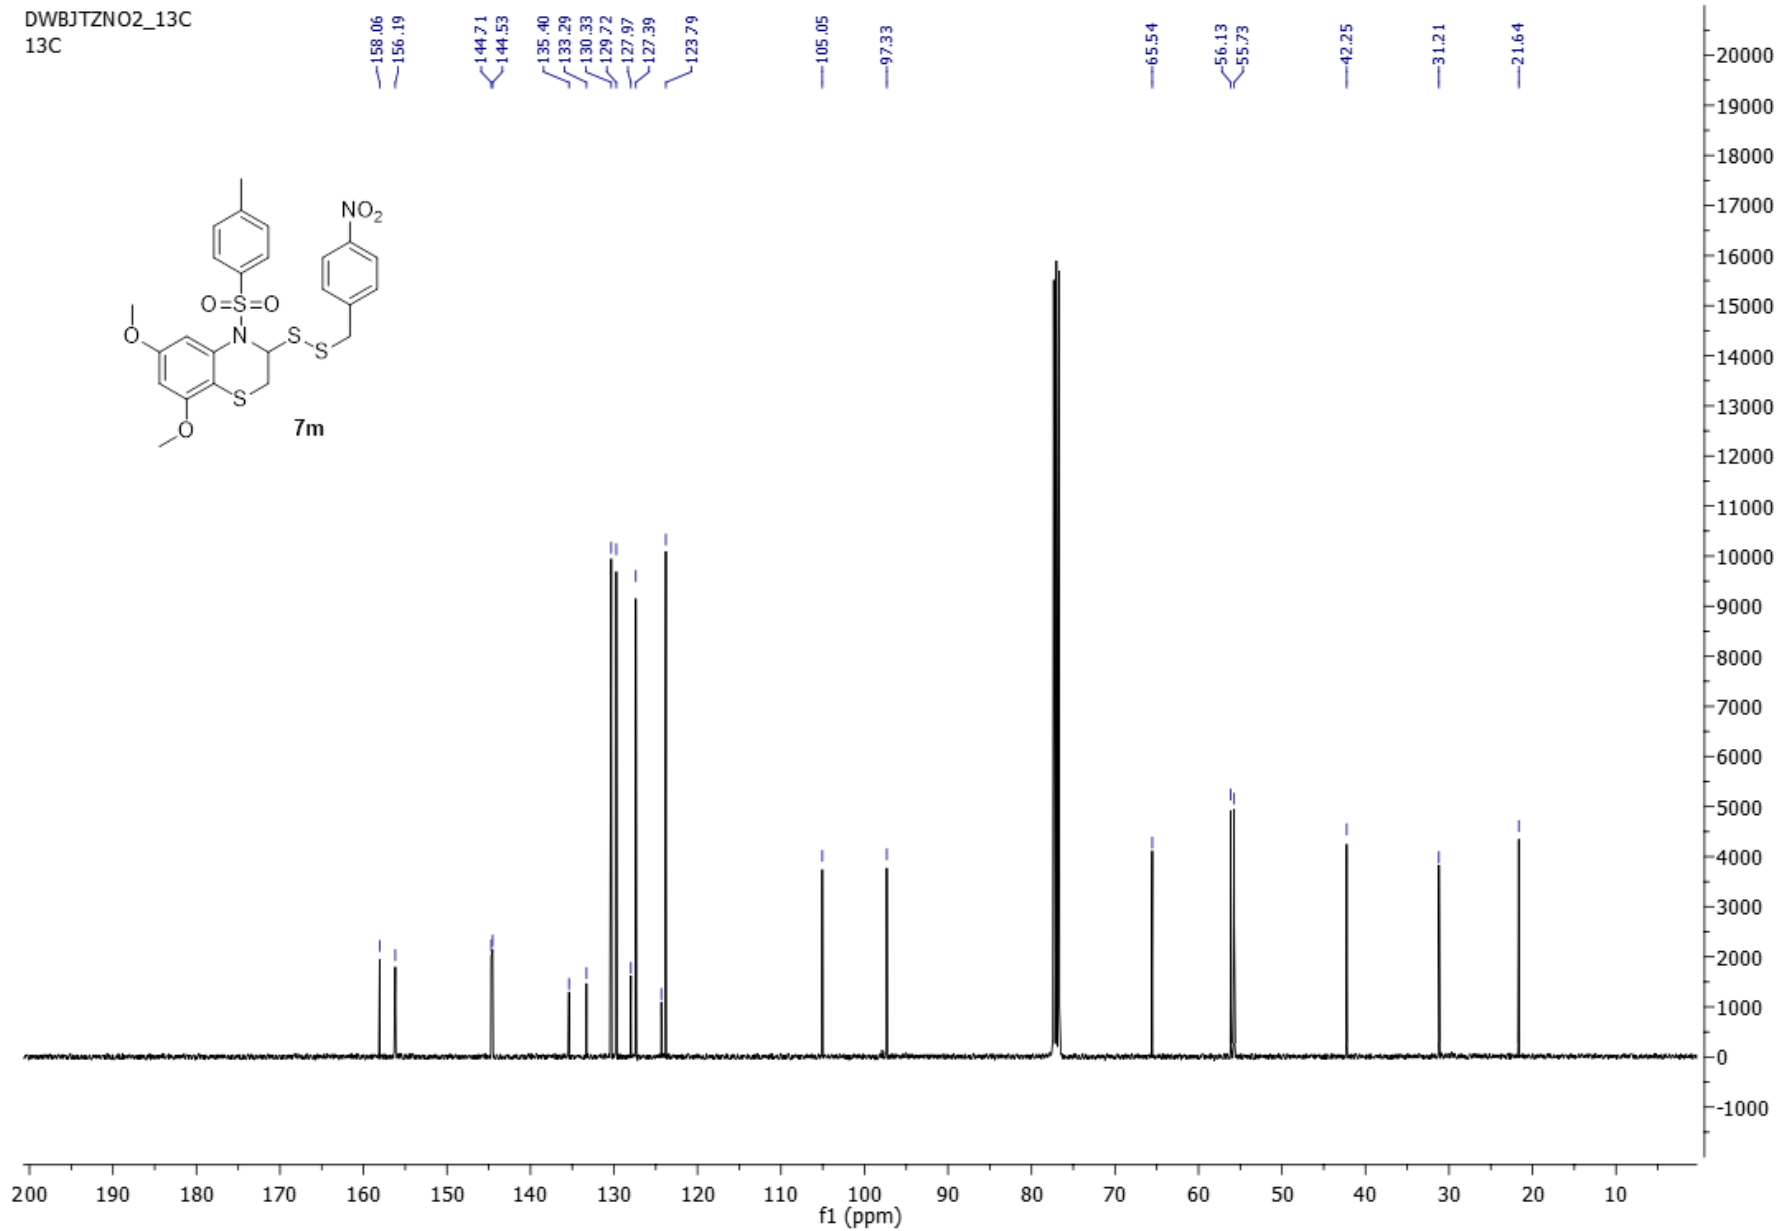

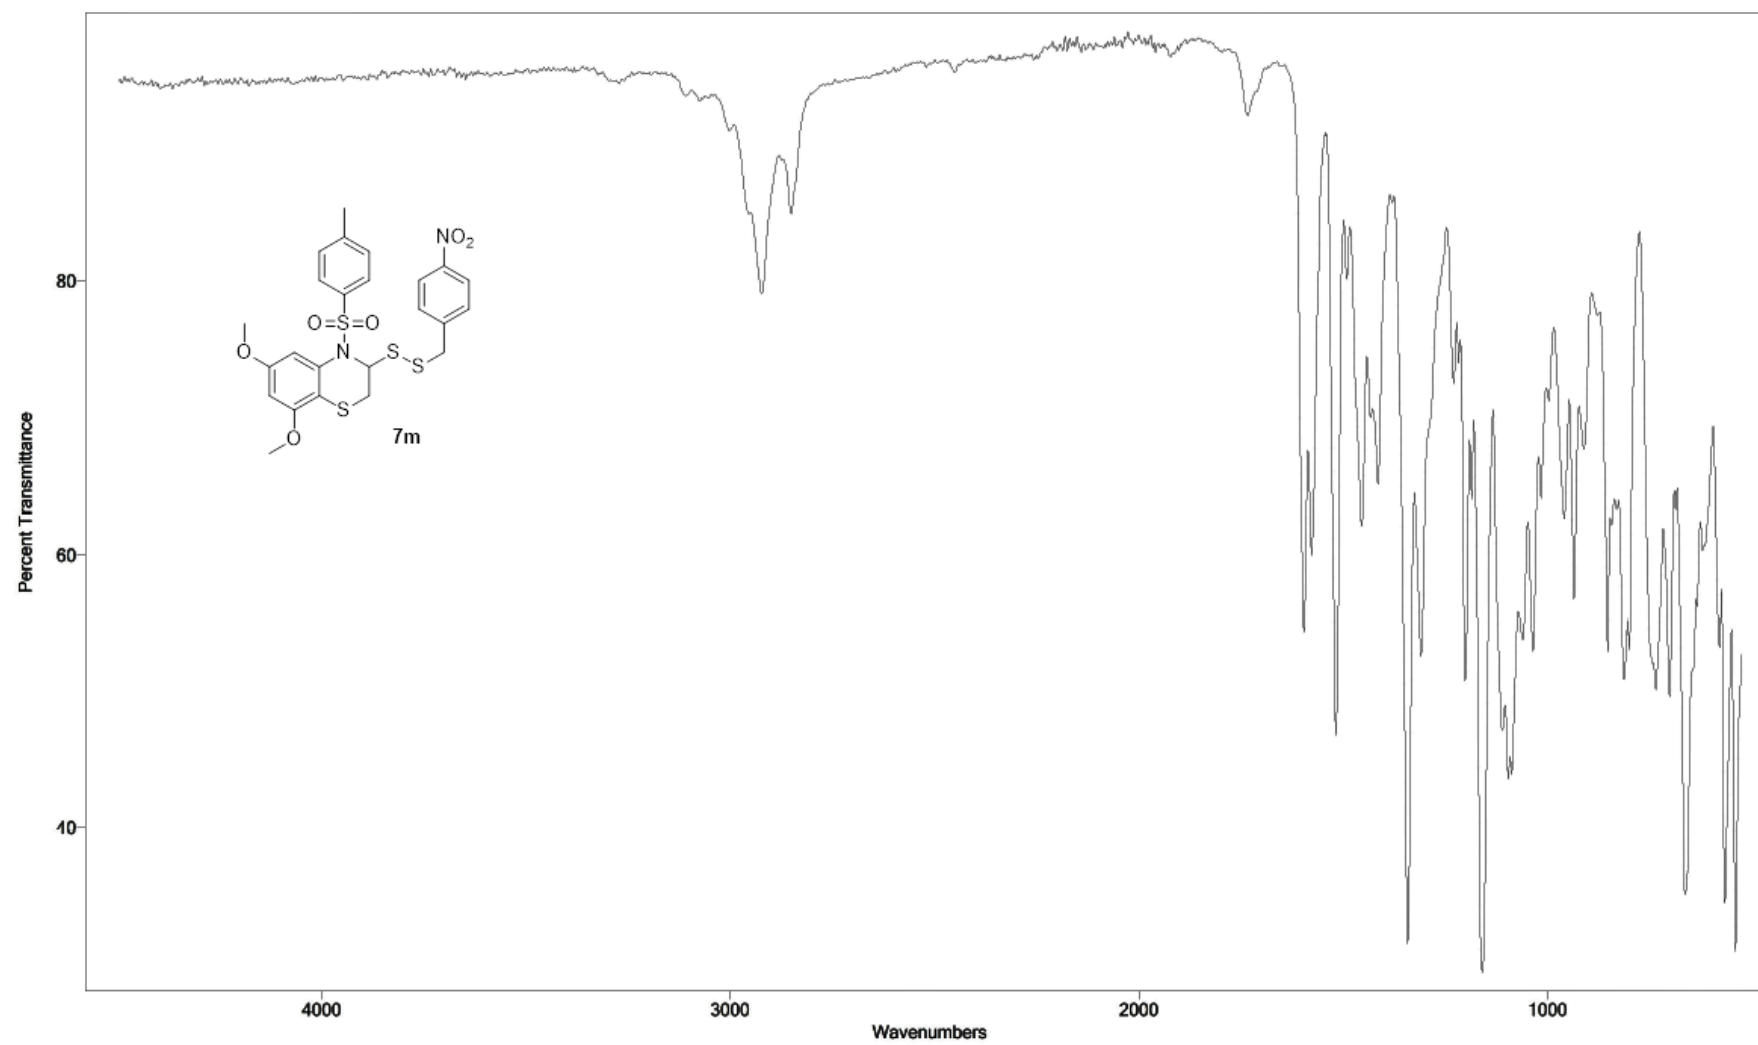

DWBJ231  
1H

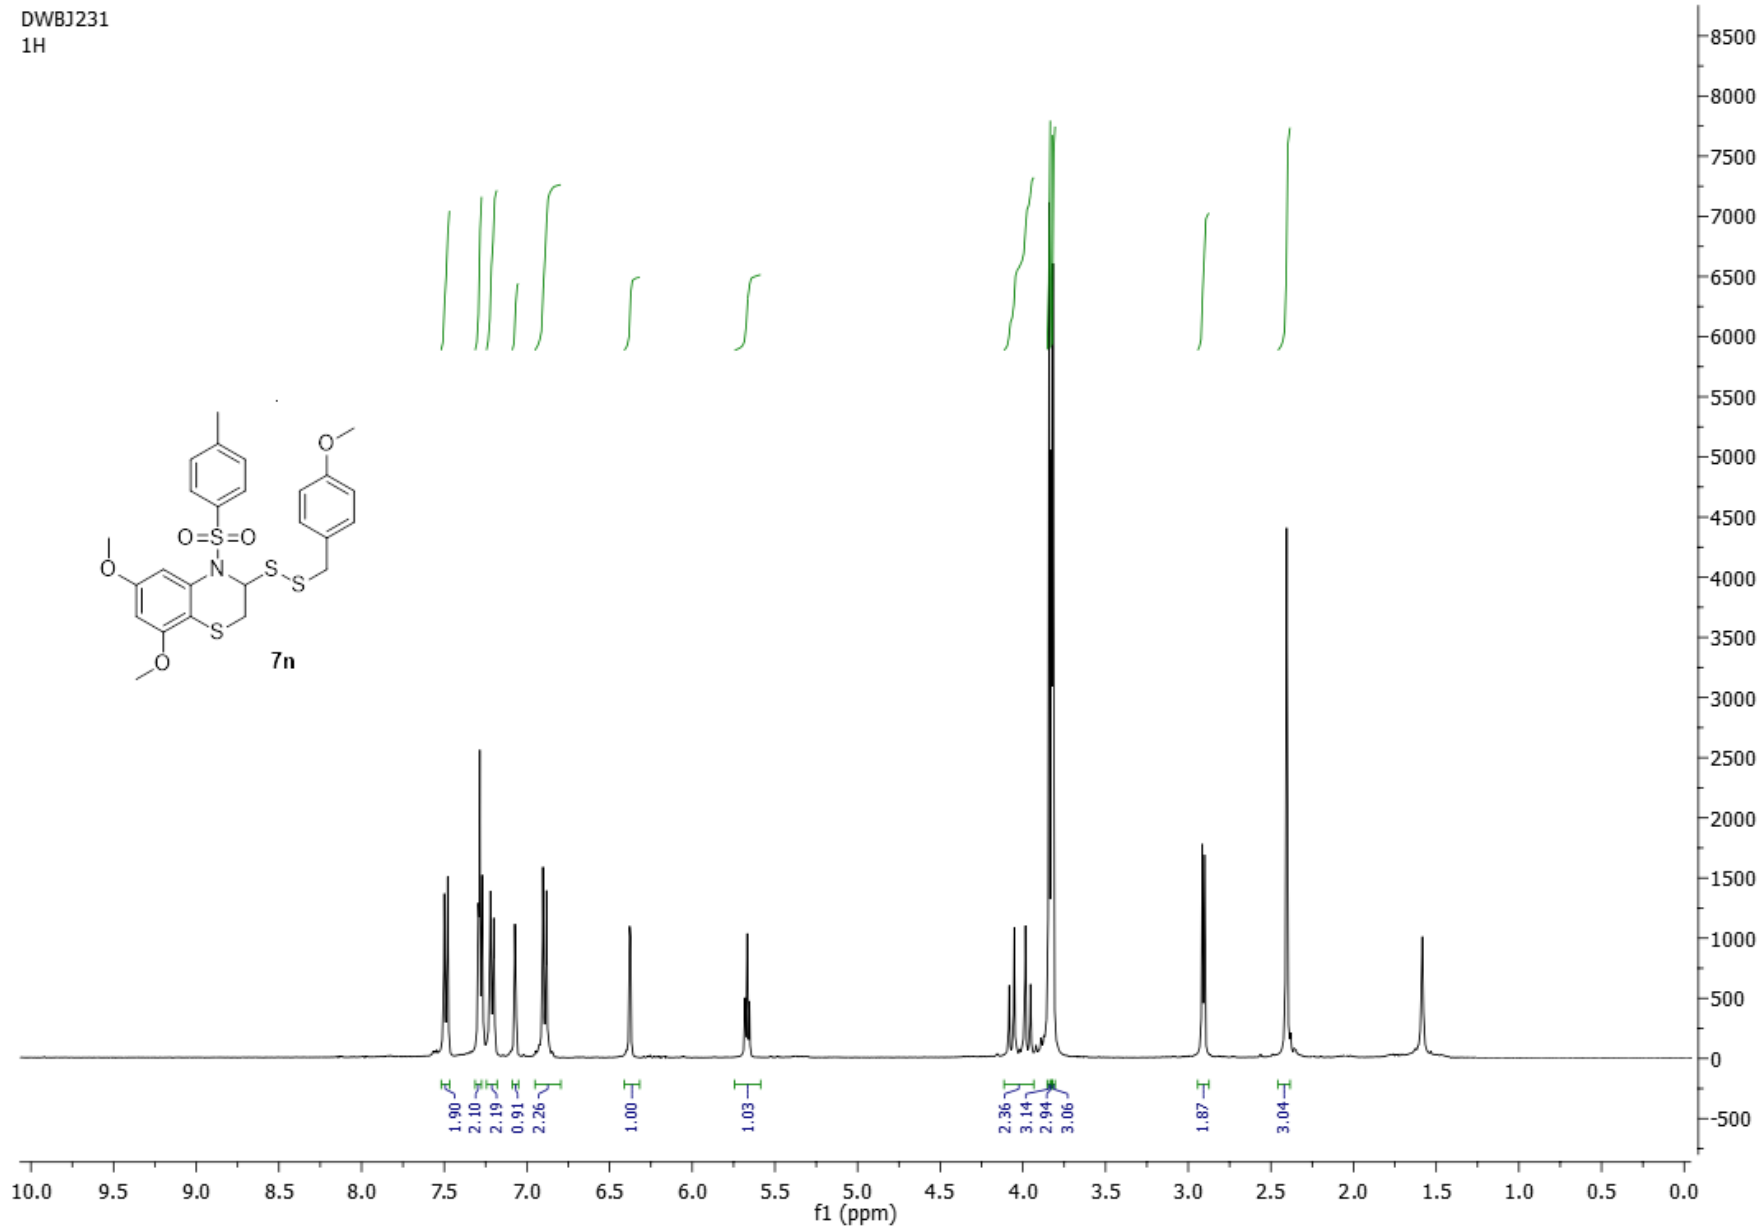

DWBJ23113C  
13C

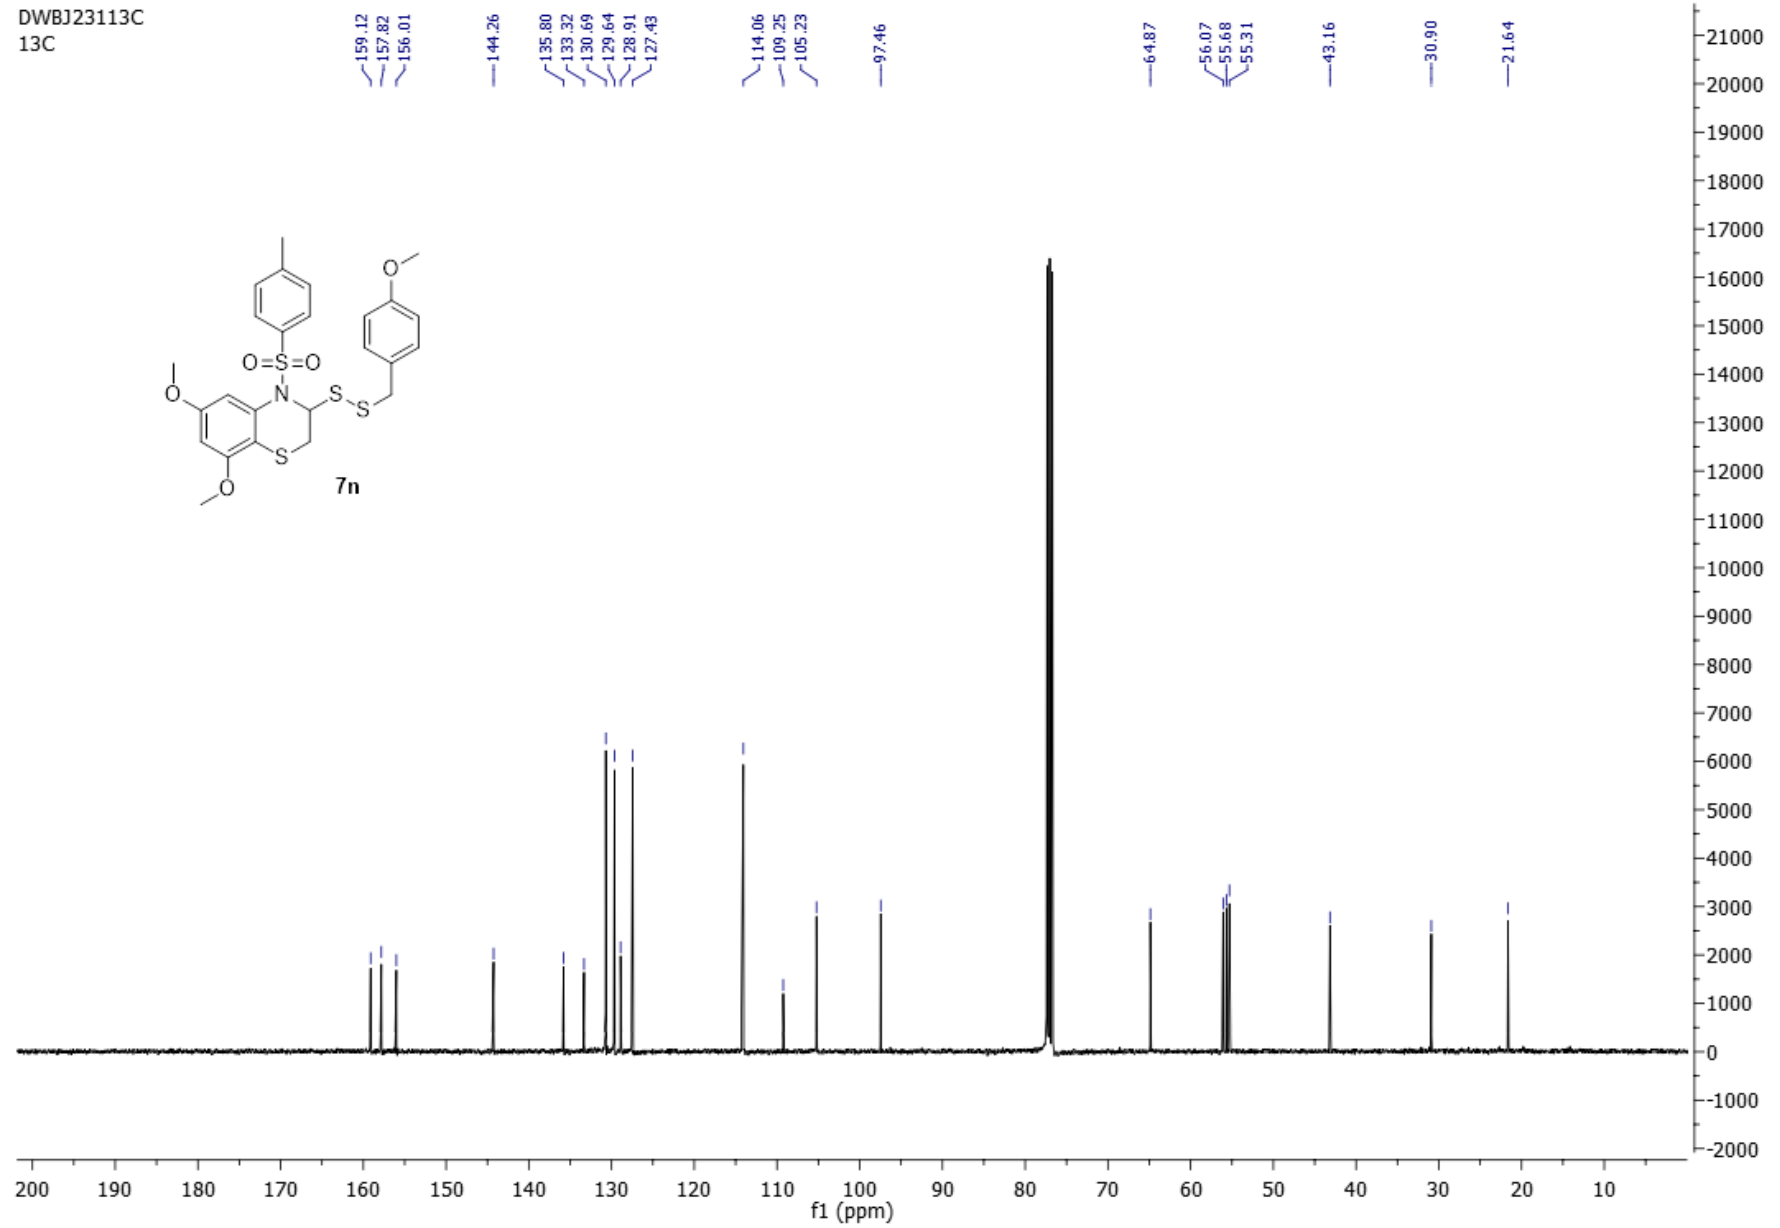



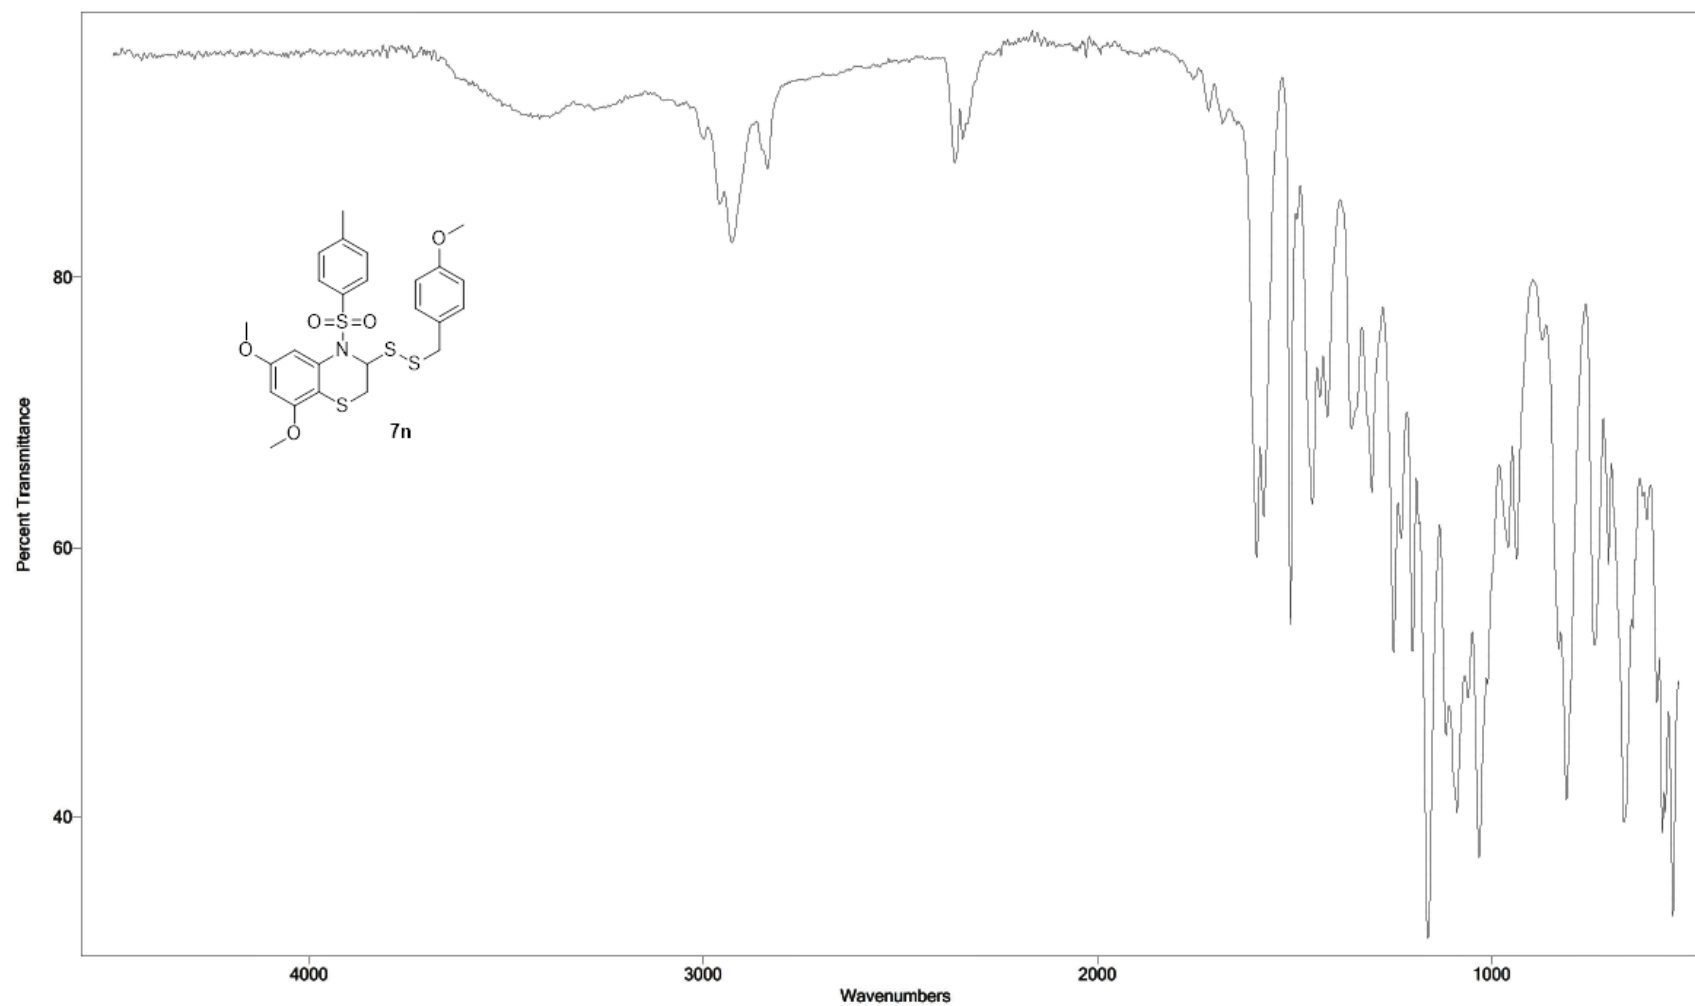

DWBJTZBN  
1H

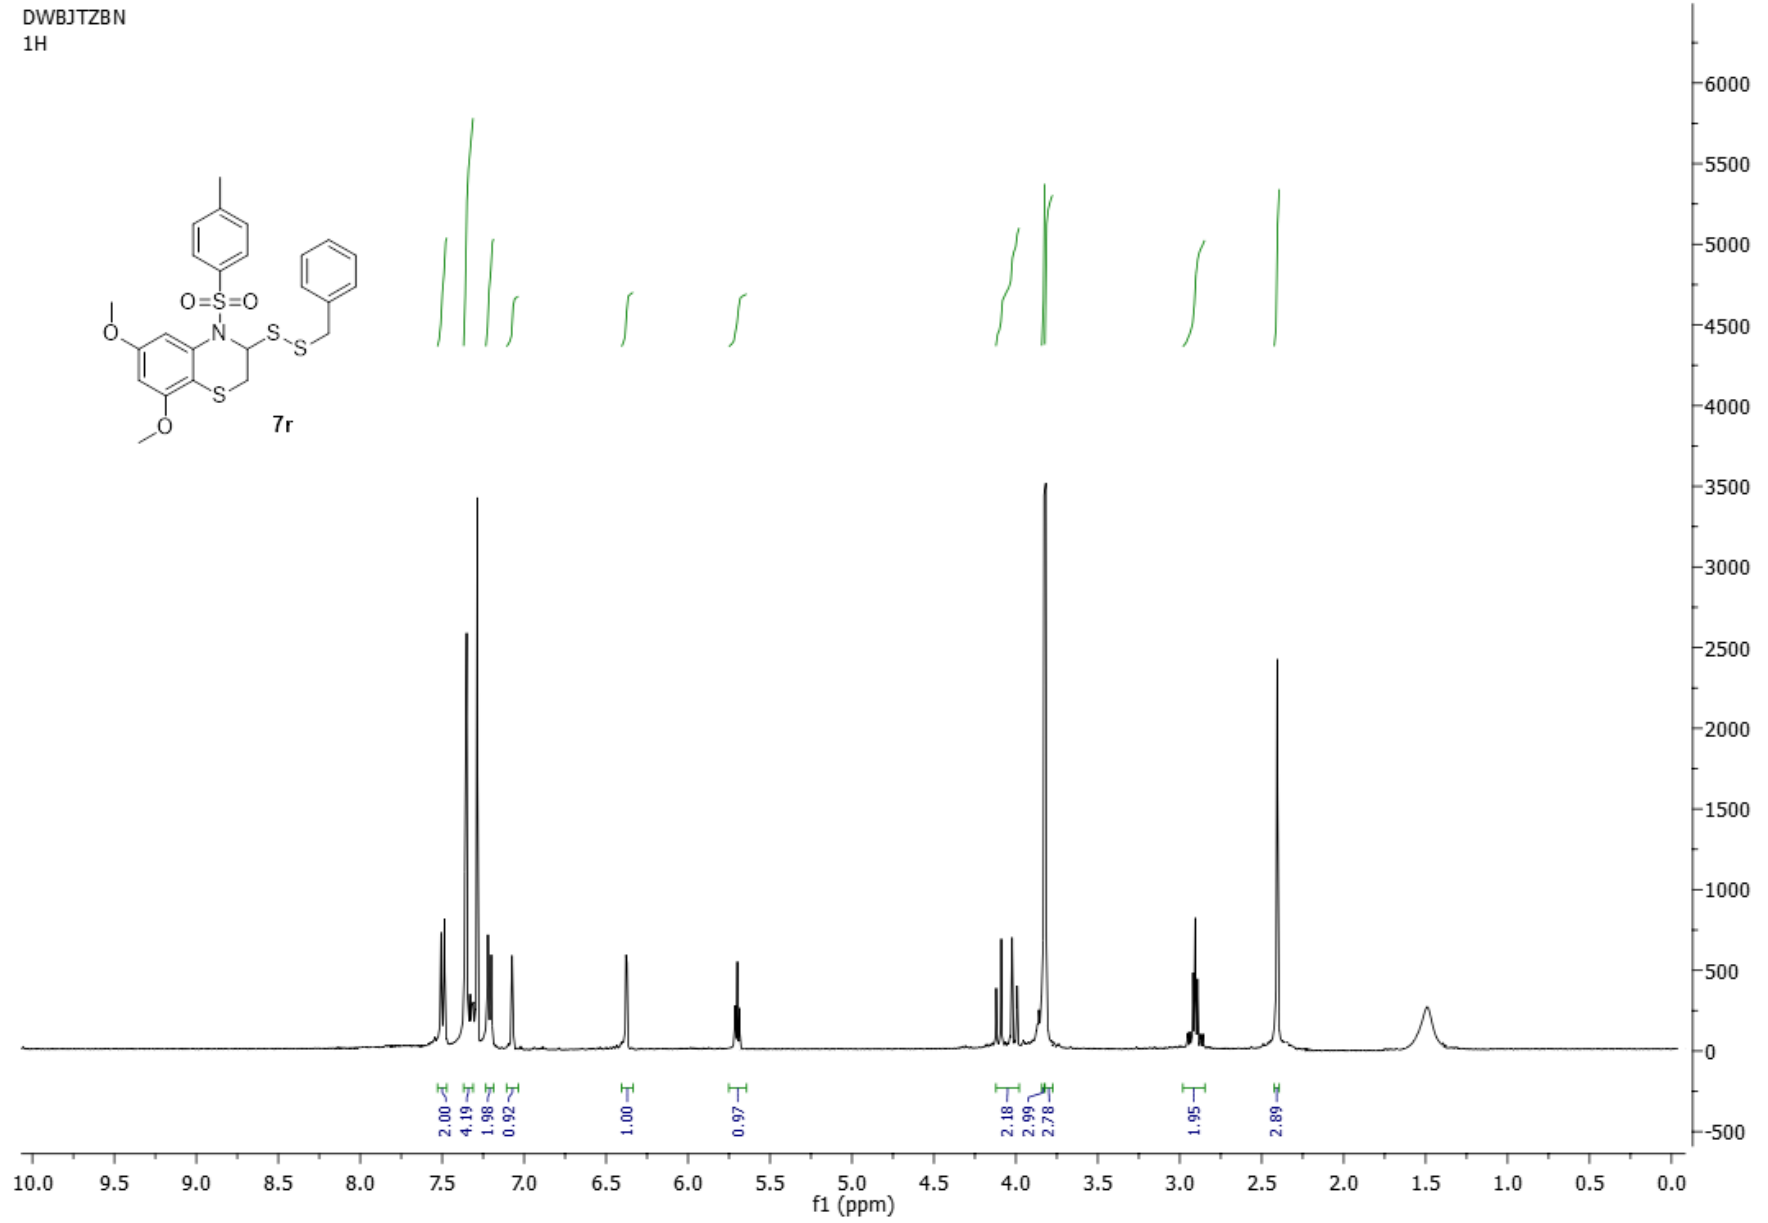

DWBJTZBN\_13C  
13C

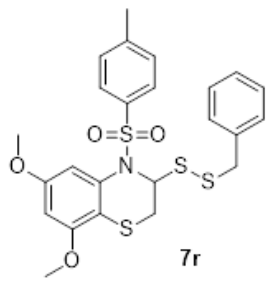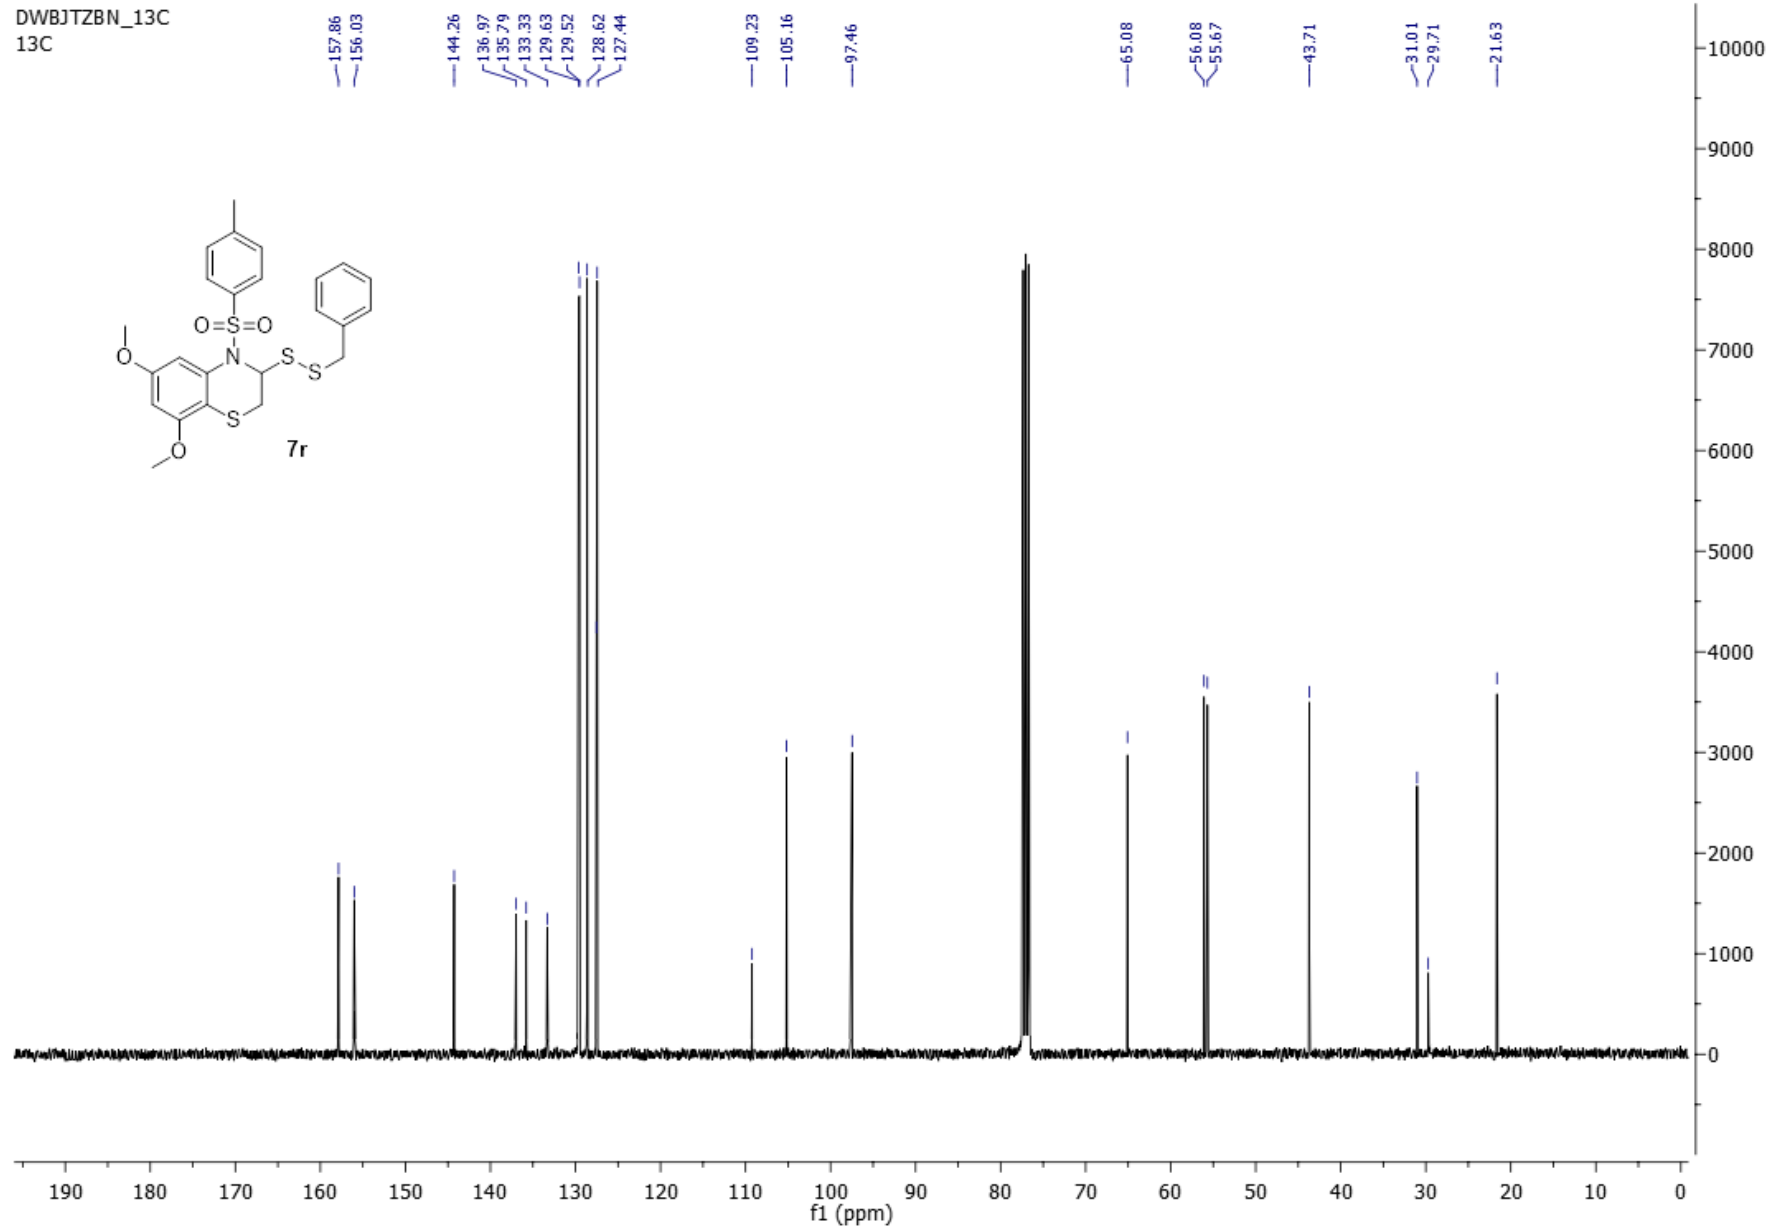

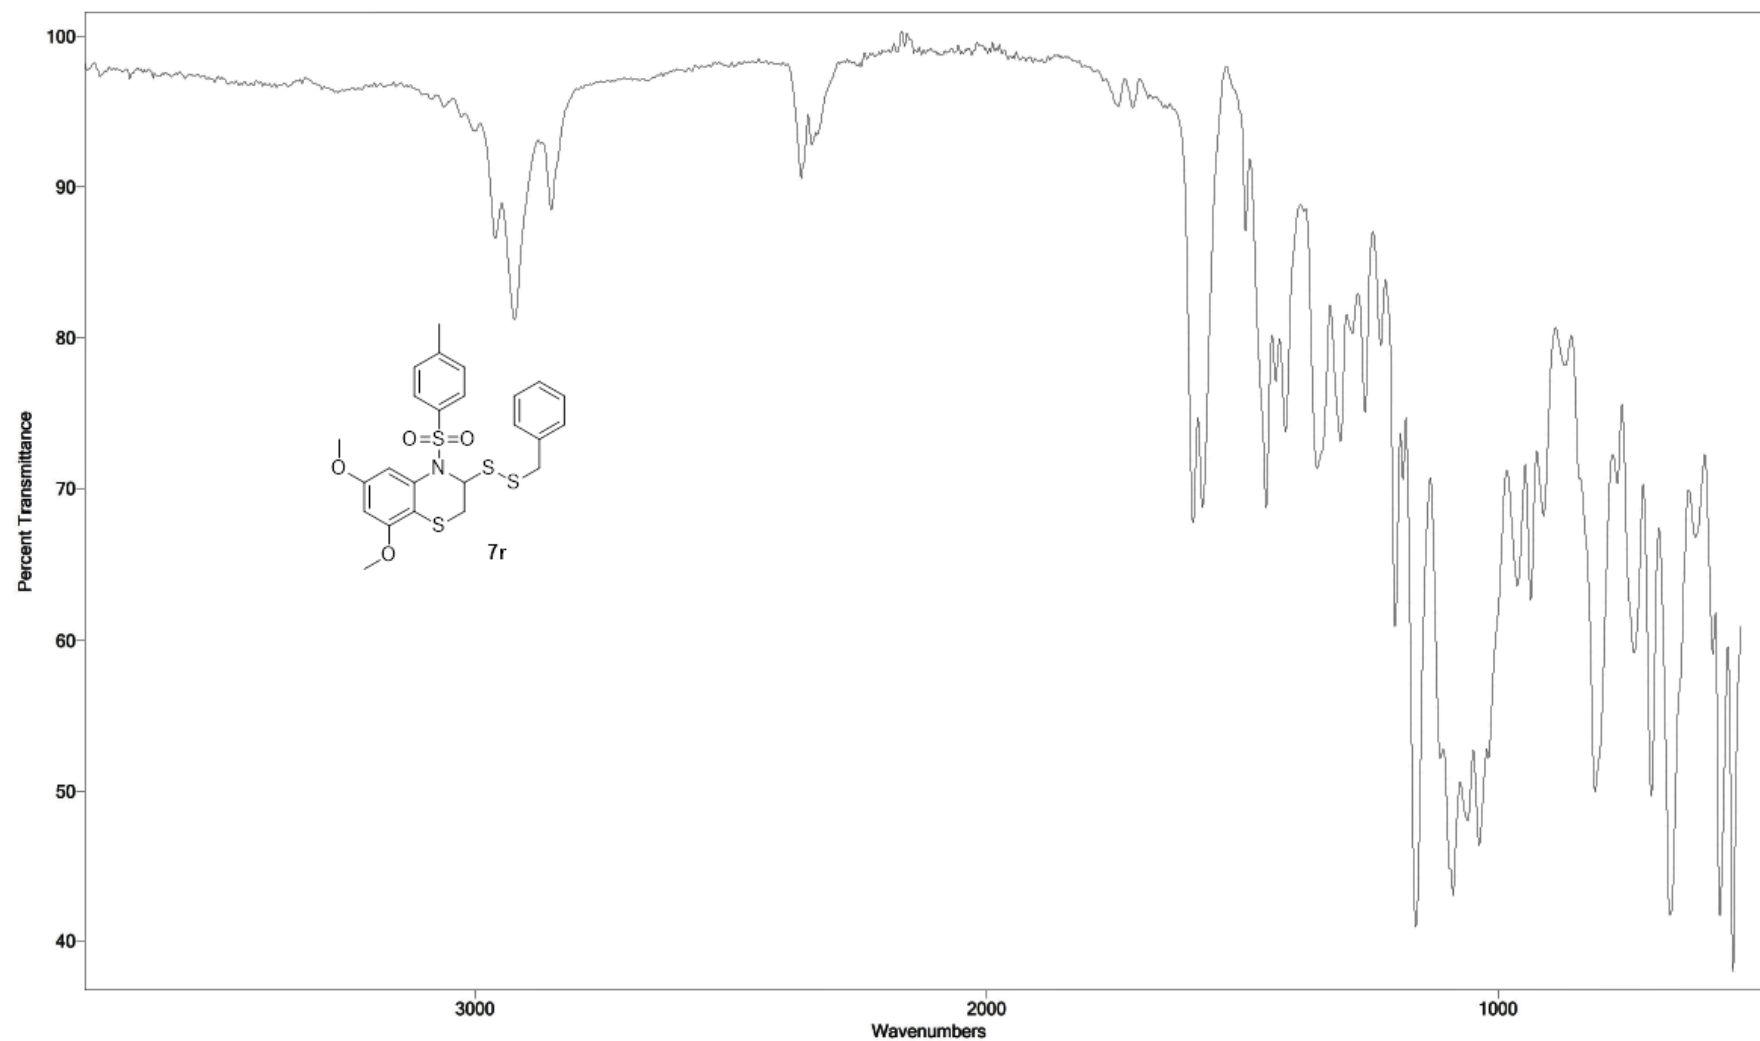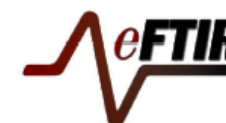

Supplement: s001 [file materials-14-01342-s001.pdf]
